# Supplementary material for: Multi-tissue network analysis reveals the effect of JNK inhibition on dietary sucrose-induced metabolic dysfunction in rats
Source: bioRxiv preprint, doi:10.1101/2024.04.22.590583, version 2 (2024-12-05)
Supplement: Data S6 [file 590583_file19.xlsx]

## Sheet: SucrosevsControl (Liver)
gene_names

## Sheet: Sucrose+JNK_D1vsSucrose (Liver)
gene_names

## Sheet: Sucrose+JNK_D2vsSucrose (Liver)
gene_names

## Sheet: SucrosevsControl (vWAT)
gene_names

## Sheet: Sucrose+JNK_D1vsSucrose (vWAT)
gene_names

## Sheet: Sucrose+JNK_D2vsSucrose (vWAT)
gene_names

## Sheet: SucrosevsControl (SkM)
gene_names

## Sheet: Sucrose+JNK_D1vsSucrose (SkM)
gene_names

## Sheet: Sucrose+JNK_D2vsSucrose (SkM)
gene_names

## Sheet: SucrosevsControl (Brain)
gene_names

[truncated: 2 more sheets: Sucrose+JNK_D1vsSucrose (Brain), Sucrose+JNK_D2vsSucrose (Brain)]
