# Supplementary material for: Multi-tissue network analysis reveals the effect of JNK inhibition on dietary sucrose-induced metabolic dysfunction in rats
Source: bioRxiv preprint, doi:10.1101/2024.04.22.590583, version 2 (2024-12-05)
Supplement: Data S7 [file 590583_file20.xlsx]

## Sheet: Liver
Gene

## Sheet: vWAT
Gene

## Sheet: SkM
Gene

## Sheet: Brain
Gene
