# Supplementary material for: Multi-tissue network analysis reveals the effect of JNK inhibition on dietary sucrose-induced metabolic dysfunction in rats
Source: bioRxiv preprint, doi:10.1101/2024.04.22.590583, version 2 (2024-12-05)
Supplement: Data S8 [file 590583_file21.xlsx]

## Sheet: SucrosevsControl (Liver)
reaction_id	wilcoxon_statistic	cohens_d	p_value	adjusted_p_value	reaction_no_direction	reaction_name	subsytem
R_10FTHF5GLUtl_pos	79	1.3455	0.0250536	0.0536924	10FTHF5GLUtl	5-glutamyl-10FTHF transport, lysosomal	Transport, lysosomal
R_10FTHF5GLUtm_pos	63	1.07683	0.331162	0.414457	10FTHF5GLUtm	5-glutamyl-10FTHF transport, mitochondrial	Transport, mitochondrial
R_10FTHF6GLUtl_pos	79	1.37334	0.0250536	0.0536924	10FTHF6GLUtl	6-glutamyl-10FTHF transport, lysosomal	Transport, lysosomal
R_10FTHF6GLUtm_pos	65	1.03083	0.260979	0.340299	10FTHF6GLUtm	6-glutamyl-10FTHF transport, mitochondrial	Transport, mitochondrial
R_10FTHF7GLUtl_pos	78	1.40438	0.0310312	0.0617975	10FTHF7GLUtl	7-glutamyl-10FTHF transport, lysosomal	Transport, lysosomal
R_10FTHF7GLUtm_pos	68	0.985884	0.175411	0.24229	10FTHF7GLUtm	7-glutamyl-10FTHF transport, mitochondrial	Transport, mitochondrial
R_10FTHFtl_neg	79	1.3455	0.0250536	0.0536924	10FTHFtl	10-Formyltetrahydrofolate lysosomal transport via diffusion	Transport, lysosomal
R_10FTHFtm_neg	2	-2.34715	4.76304e-05	0.00769926	10FTHFtm	10-Formyltetrahydrofolate mitochondrial transport via diffusion	Transport, mitochondrial
R_10FTHFtm_pos	3	-2.24077	8.33532e-05	0.00769926	10FTHFtm	10-Formyltetrahydrofolate mitochondrial transport via diffusion	Transport, mitochondrial
R_11DOCRTSLte_pos	71	1.09194	0.111943	0.166021	11DOCRTSLte	Transport of 11-Deoxycortisol, Extracellular	Transport, extracellular
R_11DOCRTSLtm_pos	70	1.02331	0.130805	0.189642	11DOCRTSLtm	11-deoxycortisol intracellular transport	Transport, mitochondrial
R_11DOCRTSLtr_neg	77	1.27927	0.0381281	0.0718944	11DOCRTSLtr	11-deoxycortisol intracellular transport	Transport, endoplasmic reticular
R_11DOCRTSTRNte_pos	78	1.2817	0.0310312	0.0617975	11DOCRTSTRNte	Transport of 11-Deoxycorticosterone, Extracellular	Transport, extracellular
R_11DOCRTSTRNtm_pos	81	1.37637	0.0158966	0.0405158	11DOCRTSTRNtm	11-deoxycorticosterone intracellular transport	Transport, mitochondrial
R_11DOCRTSTRNtr_neg	78	1.38403	0.0310312	0.0617975	11DOCRTSTRNtr	11-deoxycorticosterone intracellular transport	Transport, endoplasmic reticular
R_12DHCHOLabc_pos	86	1.60628	0.0042391	0.0222853	12DHCHOLabc	12-Dehydrocholic acid ABC bile acid transporter	Transport, extracellular
R_12DHCHOLt2_pos	61	0.0887791	0.411896	0.496012	12DHCHOLt2	12-Dehydrocholic acid transport via sodium cotransport	Transport, extracellular
R_12DHCHOLt_neg	61	0.0887791	0.411896	0.496012	12DHCHOLt	12-Dehydrocholic acid transport via bicarbonate countertransport	Transport, extracellular
R_12DHCHOLt_pos	85	1.60411	0.00565611	0.0245801	12DHCHOLt	12-Dehydrocholic acid transport via bicarbonate countertransport	Transport, extracellular
R_12HARACHDte_pos	85	1.53831	0.00565611	0.0245801	12HARACHDte	Transport of 12 Hydroxy Arachidonic Acid, Extracellular Space, Active Transport	Transport, extracellular
R_12HARACHDtr_pos	85	1.53831	0.00565611	0.0245801	12HARACHDtr	Transport of 12 Hydroxy Arachidonic Acid, Endoplasmatic Reticulum, Active Transport	Transport, endoplasmic reticular
R_12HPETATP_pos	90	1.69497	0.00115504	0.0123231	12HPETATP	Transport of 12-Hydroperoxyeicosa-5, 8, 10, 14-Tetraenoate, by FATP	Transport, extracellular
R_12HPETUPKt_pos	90	1.69497	0.00115504	0.0123231	12HPETUPKt	Transport of 12-Hydroperoxyeicosa-5, 8, 10, 14-Tetraenoate, by Diffusion	Transport, extracellular
R_12HTACRhr_pos	82	1.38078	0.0124673	0.0352696	12HTACRhr	Oxidation of tacrolimus in hepatocytes	Drug metabolism
R_12HTACRitr_pos	82	1.38078	0.0124673	0.0352696	12HTACRitr	12HTACRitr	Drug metabolism
R_12HTACRtep_neg	90	1.69497	0.00115504	0.0123231	12HTACRtep	Exit of 12-hydroxy tacrolimus into portal blood	Drug metabolism
R_12HTACRtep_pos	82	1.38078	0.0124673	0.0352696	12HTACRtep	Exit of 12-hydroxy tacrolimus into portal blood	Drug metabolism
R_12HTACRtu_pos	90	1.69497	0.00115504	0.0123231	12HTACRtu	Efflux of 12-hydroxy tacrolimus into intestinal lumen by ABC transporter	Drug metabolism
R_12PPDRte_neg	80	1.43881	0.0200405	0.0465357	12PPDRte	Assumed Passive Diffusion into Extracellular Space	Transport, extracellular
R_12PPDRte_pos	81	1.21479	0.0158966	0.0405158	12PPDRte	Assumed Passive Diffusion into Extracellular Space	Transport, extracellular
R_1331TAALThr_pos	77	1.3012	0.0381281	0.0718944	1331TAALThr	Demethylation of 13-O-desmethyl-tacrolimus to 13,31-O-Didesmethyl-tacrolimus in hepatocytes	Drug metabolism
R_1331TACRhr_pos	77	1.3012	0.0381281	0.0718944	1331TACRhr	Demethylation of 31-O-desmethyl-tacrolimus to 13,31-O-Didesmethyl-tacrolimus in hepatocytes	Drug metabolism
R_1331TACRteb_pos	78	1.35035	0.0310312	0.0617975	1331TACRteb	Efflux of 13,31-O-Didesmethyl-tacrolimus into bile	Drug metabolism
R_1331TACRtev_pos	77	1.3111	0.0381281	0.0718944	1331TACRtev	Exit of 13,31-O-Didesmethyl-tacrolimus into hepatic vein	Drug metabolism
R_13DAMPPOX_pos	79	1.23567	0.0250536	0.0536924	13DAMPPOX	1,3-Diaminopropane:oxygen oxidoreductase (deaminating)	Beta-Alanine metabolism
R_13DAMPPte_neg	66	0.794592	0.229864	0.307805	13DAMPPte	Facilitated Diffusion Through Uniport Octs Transporters into Extracellular Space	Transport, extracellular
R_13DAMPPte_pos	87	1.56019	0.00314361	0.0195418	13DAMPPte	Facilitated Diffusion Through Uniport Octs Transporters into Extracellular Space	Transport, extracellular
R_13DMThr_pos	77	1.29705	0.0381281	0.0718944	13DMThr	Demthylation of tacrolimus to 13-O-desmethyl tacrolimus in hepatocytes	Drug metabolism
R_13DMTitr_neg	77	1.29705	0.0381281	0.0718944	13DMTitr	13DMTitr	Drug metabolism
R_13DMTitr_pos	77	1.29705	0.0381281	0.0718944	13DMTitr	13DMTitr	Drug metabolism
R_13DMTtep_neg	90	1.69293	0.00115504	0.0123231	13DMTtep	Exit of 13-O-desmethyl tacrolimus into portal blood	Drug metabolism
R_13DMTtep_pos	77	1.29705	0.0381281	0.0718944	13DMTtep	Exit of 13-O-desmethyl tacrolimus into portal blood	Drug metabolism
R_13DMTtu_pos	90	1.69497	0.00115504	0.0123231	13DMTtu	Efflux of 13-O-desmethyl tacrolimus into intestinal lumen by ABC transporter	Drug metabolism
R_13HTACRitr_pos	77	1.3111	0.0381281	0.0718944	13HTACRitr	13HTACRitr	Drug metabolism
R_13_CIS_RETNte_neg	78	1.32306	0.0310312	0.0617975	13_CIS_RETNte	Transport of 13-Cis-Retinoate	Transport, extracellular
R_13_CIS_RETNte_pos	83	1.43426	0.00969278	0.0304849	13_CIS_RETNte	Transport of 13-Cis-Retinoate	Transport, extracellular
R_14HMDZALThr_pos	80	1.37008	0.0200405	0.0465357	14HMDZALThr	Oxidation of 4-OH-midazolam to 1,4-Dihydroxy-midazolam in hepatocytes	Drug metabolism
R_14HMDZhr_pos	80	1.37008	0.0200405	0.0465357	14HMDZhr	Oxidation of 1-OH-midazolam to 1,4-Dihydroxy-midazolam in hepatocytes	Drug metabolism
R_14HMDZitr_pos	79	1.377	0.0250536	0.0536924	14HMDZitr	14HMDZitr	Drug metabolism
R_14MDZtev_pos	79	1.377	0.0250536	0.0536924	14MDZtev	Efflux of 1,4-Dihydroxy-midazolam into hepatic vein	Drug metabolism
R_1513DTACRhr_pos	77	1.3012	0.0381281	0.0718944	1513DTACRhr	Demthylation of 13-O-desmethyl tacrolimus to 13,15-O-didesmethyl tacrolimus in hepatocytes	Drug metabolism
R_1513DTALThr_pos	77	1.3012	0.0381281	0.0718944	1513DTALThr	Demthylation of 15-O-desmethyl tacrolimus to 13,15-O-didesmethyl tacrolimus in hepatocytes	Drug metabolism
R_1513TACRitr_pos	77	1.3111	0.0381281	0.0718944	1513TACRitr	1513TACRitr	Drug metabolism
R_1513TACRtep_neg	90	1.69497	0.00115504	0.0123231	1513TACRtep	Exit of 13,15-O-didesmethyl tacrolimus into portal blood	Drug metabolism
R_1513TACRtep_pos	77	1.3111	0.0381281	0.0718944	1513TACRtep	Exit of 13,15-O-didesmethyl tacrolimus into portal blood	Drug metabolism
R_1513TACRtu_pos	90	1.69497	0.00115504	0.0123231	1513TACRtu	Efflux of 13,15-O-didesmethyl tacrolimus into intestinal lumen by ABC transporter	Drug metabolism
R_1531TACRhr_pos	77	1.3012	0.0381281	0.0718944	1531TACRhr	Demethylation of 15-O-desmethyl tacrolimus to 15, 31-O-Didesmethyl-tacrolimus in hepatocytes	Drug metabolism
R_1531TACRitr_pos	77	1.3111	0.0381281	0.0718944	1531TACRitr	1531TACRitr	Drug metabolism
R_1531TACRteb_pos	78	1.35035	0.0310312	0.0617975	1531TACRteb	Efflux of 15, 31-O-Didesmethyl-tacrolimus into bile	Drug metabolism
R_1531TACRtev_pos	77	1.3111	0.0381281	0.0718944	1531TACRtev	Exit of 15, 31-O-Didesmethyl-tacrolimus into hepatic vein	Drug metabolism
R_1531TALThr_pos	77	1.3012	0.0381281	0.0718944	1531TALThr	Demethylation of 31-O-desmethyl tacrolimus to 15, 31-O-Didesmethyl-tacrolimus in hepatocytes	Drug metabolism
R_15DMThr_pos	77	1.29705	0.0381281	0.0718944	15DMThr	Demethylation of tacrolimus to 15-O-desmethyl tacrolimus in hepatocytes	Drug metabolism
R_15DMTitr_neg	77	1.29705	0.0381281	0.0718944	15DMTitr	15DMTitr	Drug metabolism
R_15DMTitr_pos	77	1.29705	0.0381281	0.0718944	15DMTitr	15DMTitr	Drug metabolism
R_15DMTtep_neg	90	1.69293	0.00115504	0.0123231	15DMTtep	Exit of 15-O-desmethyl tacrolimus into portal blood	Drug metabolism
R_15DMTtep_pos	77	1.29705	0.0381281	0.0718944	15DMTtep	Exit of 15-O-desmethyl tacrolimus into portal blood	Drug metabolism
R_15DMTtu_pos	90	1.69497	0.00115504	0.0123231	15DMTtu	Efflux of 15-O-desmethyl tacrolimus into intestinal lumen by ABC transporter	Drug metabolism
R_15HPETATP_pos	90	1.69497	0.00115504	0.0123231	15HPETATP	Transport of 15(S)-HPETE, Active Transport	Transport, extracellular
R_15HPETUPKt_pos	90	1.6943	0.00115504	0.0123231	15HPETUPKt	Transport of 15(S)-HPETE, Diffusion	Transport, extracellular
R_15KPROSTGF2c_neg	60	0.501108	0.456097	0.540863	15KPROSTGF2c	Formation of 15-Keto-Prostaglandin F2A	Eicosanoid metabolism
R_15KPROSTGF2c_pos	65	0.690557	0.260979	0.340299	15KPROSTGF2c	Formation of 15-Keto-Prostaglandin F2A	Eicosanoid metabolism
R_15KPROSTGF2t_neg	88	1.6285	0.00228626	0.0165261	15KPROSTGF2t	Transport of 15-Keto-Prostaglandin F2A, Lactate Antiport	Transport, extracellular
R_15KPROSTGF2t_pos	69	1.06164	0.151941	0.214831	15KPROSTGF2t	Transport of 15-Keto-Prostaglandin F2A, Lactate Antiport	Transport, extracellular
R_17AHPRGNLONEte_pos	71	1.12646	0.111943	0.166021	17AHPRGNLONEte	Transport of 17Alpha-Hydroxypregnenolone, Extracellular	Transport, extracellular
R_17AHPRGSTRNte_pos	71	1.05517	0.111943	0.166021	17AHPRGSTRNte	Transport of 17Alpha-Hydroxyprogesterone, Extracellular	Transport, extracellular
R_18HARACHDte_pos	84	1.49163	0.00744225	0.0264329	18HARACHDte	Transport of 18 Hydroxy Arachidonic Acid, Extracellular Space, Active Transport	Transport, extracellular
R_18HARACHDtr_pos	84	1.49163	0.00744225	0.0264329	18HARACHDtr	Transport of 18 Hydroxy Arachidonic Acid, Endoplasmatic Reticulum, Active Transport	Transport, endoplasmic reticular
R_1A25DHVITD3te_pos	73	1.1315	0.0804001	0.124359	1A25DHVITD3te	Transport As Vitamin D	Transport, extracellular
R_1A25HVITD2t_neg	78	1.39119	0.0310312	0.0617975	1A25HVITD2t	1A25HVITD2t	Transport, extracellular
R_1A25HVITD2t_pos	83	1.3571	0.00969278	0.0304849	1A25HVITD2t	1A25HVITD2t	Transport, extracellular
R_1A25HVITD2tm_neg	78	1.39119	0.0310312	0.0617975	1A25HVITD2tm	1A25HVITD2tm	Transport, mitochondrial
R_1A25HVITD2tm_pos	83	1.3571	0.00969278	0.0304849	1A25HVITD2tm	1A25HVITD2tm	Transport, mitochondrial
R_1HIBUPGLUC_Sthv_pos	82	1.52745	0.0124673	0.0352696	1HIBUPGLUC_Sthv	Release of 1-hydroxy S-ibuprofen-glucuronide into hepatic vein	Drug metabolism
R_1HIBUPGLUitr_pos	82	1.52745	0.0124673	0.0352696	1HIBUPGLUitr	1HIBUPGLUitr	Drug metabolism
R_1HIBUP_SGLUhep_pos	82	1.52745	0.0124673	0.0352696	1HIBUP_SGLUhep	Glucuronidation of 1-hydroxy ibuprofen	Drug metabolism
R_1HIBUP_Sitr_neg	79	1.39333	0.0250536	0.0536924	1HIBUP_Sitr	1HIBUP Sitr	Drug metabolism
R_1HIBUP_Sitr_pos	82	1.41848	0.0124673	0.0352696	1HIBUP_Sitr	1HIBUP Sitr	Drug metabolism
R_1HIBUP_Sthv_neg	79	1.39333	0.0250536	0.0536924	1HIBUP_Sthv	Release of 1-hydroxy-ibuprofen into hepatic vein	Drug metabolism
R_1HIBUP_Sthv_pos	82	1.41848	0.0124673	0.0352696	1HIBUP_Sthv	Release of 1-hydroxy-ibuprofen into hepatic vein	Drug metabolism
R_1HMDGLUChr_pos	82	1.50648	0.0124673	0.0352696	1HMDGLUChr	Glucuronidation of 1-OH-midazolam in enterocytes	Drug metabolism
R_1HMDGLUCitr_pos	82	1.50648	0.0124673	0.0352696	1HMDGLUCitr	1HMDGLUCitr	Drug metabolism
R_1HMDZGLUChc_neg	82	1.50648	0.0124673	0.0352696	1HMDZGLUChc	Uptake of 1-OH-midazolam-glucuronide into hepatocytes	Drug metabolism
R_1MNCAMt_neg	77	1.2533	0.0381281	0.0718944	1MNCAMt	Transport of 1-Methylnicotinamide	Transport, extracellular
R_1MNCAMt_pos	90	1.69497	0.00115504	0.0123231	1MNCAMt	Transport of 1-Methylnicotinamide	Transport, extracellular
R_1MNCAMti_pos	90	1.69497	0.00115504	0.0123231	1MNCAMti	N1-Methylnicotinamide transport	Transport, extracellular
R_1OHMDZhr_pos	82	1.38078	0.0124673	0.0352696	1OHMDZhr	Oxidation of midazolam to 1-OH-midazolam in hepatocytes	Drug metabolism
R_1OHMDZitr_neg	83	1.42234	0.00969278	0.0304849	1OHMDZitr	1OHMDZitr	Drug metabolism
R_1OHMDZitr_pos	82	1.38078	0.0124673	0.0352696	1OHMDZitr	1OHMDZitr	Drug metabolism
R_1OHMDZtep_neg	83	1.42234	0.00969278	0.0304849	1OHMDZtep	Efflux of 1-OH-midazolam into portal blood	Drug metabolism
R_1OHMDZtep_pos	82	1.38078	0.0124673	0.0352696	1OHMDZtep	Efflux of 1-OH-midazolam into portal blood	Drug metabolism
R_1PPDCRp_pos	81	1.28723	0.0158966	0.0405158	1PPDCRp	Delta1-piperideine-2-carboxylate reductase, perixosomal	Lysine metabolism
R_1a25DHVITD3TRn_pos	85	1.35962	0.00565611	0.0245801	1a25DHVITD3TRn	Tanslocation of 1-alpha,25-Dihydroxyvitamin D3 to nucleus	Transport, nuclear
R_1a_24_25VITD2Hm_pos	84	1.54644	0.00744225	0.0264329	1a_24_25VITD2Hm	1-alpha-Vitamin D-24,25-hydroxylase (D2)	Vitamin D metabolism
R_1a_25VITD2Hm_pos	84	1.49015	0.00744225	0.0264329	1a_25VITD2Hm	1-alpha,24R,25-Vitamin D-hydroxylase (D2)	Vitamin D metabolism
R_21HPRGNLONE_pos	78	1.31901	0.0310312	0.0617975	21HPRGNLONE	Formation of 21-Hydroxypregnenolone	Steroid metabolism
R_21HPRGNLONEt1_pos	90	1.69497	0.00115504	0.0123231	21HPRGNLONEt1	Transport of 21-Hydroxypregnenolone, Active Transport	Transport, extracellular
R_21HPRGNLONEt2_neg	90	1.69497	0.00115504	0.0123231	21HPRGNLONEt2	Transport of 21-Hydroxypregnenolone, Diffusion	Transport, extracellular
R_21HPRGNLONEt2_pos	78	1.31901	0.0310312	0.0617975	21HPRGNLONEt2	Transport of 21-Hydroxypregnenolone, Diffusion	Transport, extracellular
R_24NPHte_neg	68	0.853017	0.175411	0.24229	24NPHte	Xenobiotic transport	Transport, extracellular
R_24_25DHVITD2t_pos	78	1.39457	0.0310312	0.0617975	24_25DHVITD2t	24,25-Dihydroxyvitamin D2 transport from cytoplasm	Transport, extracellular
R_24_25DHVITD2tm_pos	78	1.39457	0.0310312	0.0617975	24_25DHVITD2tm	24,25-Dihydroxyvitamin D2 transport from mitochondria	Transport, mitochondrial
R_24_25DHVITD3t_pos	84	1.41419	0.00744225	0.0264329	24_25DHVITD3t	24,25-Dihydroxyvitamin D3 transport from cytoplasm	Transport, extracellular
R_24_25DHVITD3tm_pos	84	1.3929	0.00744225	0.0264329	24_25DHVITD3tm	24,25-Dihydroxyvitamin D3 transport from mitochondria	Transport, mitochondrial
R_24_25VITD2Hm_pos	78	1.39457	0.0310312	0.0617975	24_25VITD2Hm	24R-Vitamin D-25-hydroxylase (D2)	Vitamin D metabolism
R_24_25VITD3Hm_pos	84	1.3929	0.00744225	0.0264329	24_25VITD3Hm	24R-Vitamin D-25-hydroxylase (D3)	Vitamin D metabolism
R_25HVITD2tin_m_pos	83	1.38031	0.00969278	0.0304849	25HVITD2tin_m	25-hydroxyvitamin D2 transport in mitochondria	Transport, mitochondrial
R_25HVITD3c_pos	84	1.36517	0.00744225	0.0264329	25HVITD3c	1-alpha hydroxylation of 25-hydroxy vitamin D	Vitamin D metabolism
R_25HVITD3t_pos	83	1.34823	0.00969278	0.0304849	25HVITD3t	25-hydroxyvitamin D3 transport from cytoplasm	Transport, extracellular
R_25HVITD3tin_m_pos	84	1.36929	0.00744225	0.0264329	25HVITD3tin_m	25-hydroxyvitamin D3 transport in mitochondria	Transport, mitochondrial
R_25VITD2Hm_pos	83	1.3571	0.00969278	0.0304849	25VITD2Hm	1-alpha-Vitamin D-25-hydroxylase (D2)	Vitamin D metabolism
R_25VITD3Hm_pos	84	1.35786	0.00744225	0.0264329	25VITD3Hm	1-alpha-Vitamin D-25-hydroxylase (D3)	Vitamin D metabolism
R_2AMACHYD_pos	4	-2.40135	0.000142891	0.00812649	2AMACHYD	2-Aminoacrylate hydrolysis	Glycine, serine, alanine, and threonine metabolism
R_2AMACSULT_pos	66	0.612664	0.229864	0.307805	2AMACSULT	2-Aminoacrylate sulfotransferase	Methionine and cysteine metabolism
R_2AMADPTm_pos	24	-0.664739	0.056192	0.0958446	2AMADPTm	L-2-aminoadipate shuttle (cytosol/mitochondria)	Lysine metabolism
R_2DR1PP_pos	76	0.92996	0.0464515	0.0828554	2DR1PP	2-deoxy-D-ribose 1-phosphate phosphorylase	Pyrimidine catabolism
R_2H3MVc_neg	75	1.21587	0.056192	0.0958446	2H3MVc	Formation of 2-Hydroxy-3-Methyl-Valerate	Valine, leucine, and isoleucine metabolism
R_2H3MVc_pos	50	0.00798304	1	1	2H3MVc	Formation of 2-Hydroxy-3-Methyl-Valerate	Valine, leucine, and isoleucine metabolism
R_2H3MVte_neg	75	1.21587	0.056192	0.0958446	2H3MVte	Transport of 2-Hydroxy-3-Methyl-Valerate	Transport, extracellular
R_2H3MVte_pos	50	0.00798304	1	1	2H3MVte	Transport of 2-Hydroxy-3-Methyl-Valerate	Transport, extracellular
R_2HATVACIDGLUChr_pos	85	1.54704	0.00565611	0.0245801	2HATVACIDGLUChr	Glucuronidation of 2-hydroxy-atorvastatin-acid in hepatocytes	Drug metabolism
R_2HATVACIDGLUCitr_pos	85	1.54704	0.00565611	0.0245801	2HATVACIDGLUCitr	2HATVACIDGLUCitr	Drug metabolism
R_2HATVACIDGLUCteb_pos	85	1.54704	0.00565611	0.0245801	2HATVACIDGLUCteb	Efflux of 2-hydroxy-atorvastatin-acyl-glucuronide into bile	Drug metabolism
R_2HATVACIDOXDhc_pos	85	1.50517	0.00565611	0.0245801	2HATVACIDOXDhc	Oxidation of atorvastatin acid to 2-hydroxy-atorvastatin-acid in hepatocytes	Drug metabolism
R_2HATVACIDhc_pos	75	1.23759	0.056192	0.0958446	2HATVACIDhc	Conversion of 2-hydroxy-atorvastatin-lactone to its acid form in hepatocytes	Drug metabolism
R_2HATVACIDitr_neg	81	1.36928	0.0158966	0.0405158	2HATVACIDitr	2HATVACIDitr	Drug metabolism
R_2HATVACIDitr_pos	85	1.50517	0.00565611	0.0245801	2HATVACIDitr	2HATVACIDitr	Drug metabolism
R_2HATVACIDteb_pos	75	0.997182	0.056192	0.0958446	2HATVACIDteb	Efflux of 2-hydroxy-atorvastatin-acid into bile	Drug metabolism
R_2HATVACIDtep_neg	97	1.52539	4.76304e-05	0.00769926	2HATVACIDtep	Efflux of 2-hydroxy-atorvastatin-acid into portal blood	Drug metabolism
R_2HATVACIDtep_pos	99	1.64842	1.19076e-05	0.00431274	2HATVACIDtep	Efflux of 2-hydroxy-atorvastatin-acid into portal blood	Drug metabolism
R_2HATVACIDthc_neg	97	1.52539	4.76304e-05	0.00769926	2HATVACIDthc	Uptake of 2-hydroxy-atorvastatin-acid into hepatocytes	Drug metabolism
R_2HATVACIDthc_pos	99	1.64842	1.19076e-05	0.00431274	2HATVACIDthc	Uptake of 2-hydroxy-atorvastatin-acid into hepatocytes	Drug metabolism
R_2HATVLACGLUChr_pos	85	1.55943	0.00565611	0.0245801	2HATVLACGLUChr	Glucuronidation of 2-hydroxy-atorvastatin-lactone in hepatocytes	Drug metabolism
R_2HATVLACGLUCitr_pos	85	1.55943	0.00565611	0.0245801	2HATVLACGLUCitr	2HATVLACGLUCitr	Drug metabolism
R_2HATVLACGLUCteb_pos	85	1.55943	0.00565611	0.0245801	2HATVLACGLUCteb	Efflux of 2-hydroxy-atorvastatin-lactone-glucuronide into bile	Drug metabolism
R_2HATVLACOXDhc_pos	85	1.55943	0.00565611	0.0245801	2HATVLACOXDhc	Oxidation of atorvastatin lactone to 2-hydroxy-atorvastatin-lactone in hepatocytes	Drug metabolism
R_2HATVLAChc_pos	75	1.23823	0.056192	0.0958446	2HATVLAChc	Conversion of 2-hydroxy-atorvastatin-acid to its lactone form in hepatocytes	Drug metabolism
R_2HATVLACteb_pos	75	0.997182	0.056192	0.0958446	2HATVLACteb	Efflux of 2-hydroxy-atorvastatin-lactone into bile	Drug metabolism
R_2HATVLACtep_neg	97	1.52539	4.76304e-05	0.00769926	2HATVLACtep	Efflux of 2-hydroxy-atorvastatin-lactone into portal blood	Drug metabolism
R_2HATVLACtep_pos	99	1.64842	1.19076e-05	0.00431274	2HATVLACtep	Efflux of 2-hydroxy-atorvastatin-lactone into portal blood	Drug metabolism
R_2HATVLACthc_neg	97	1.52539	4.76304e-05	0.00769926	2HATVLACthc	Uptake of 2-hydroxy-atorvastatin-lactone into hepatocytes	Drug metabolism
R_2HATVLACthc_pos	99	1.64842	1.19076e-05	0.00431274	2HATVLACthc	Uptake of 2-hydroxy-atorvastatin-lactone into hepatocytes	Drug metabolism
R_2HBO_neg	81	1.2161	0.0158966	0.0405158	2HBO	2 HydroxybutyrateNAD oxidoreductase	Propanoate metabolism
R_2HBO_pos	77	1.36543	0.0381281	0.0718944	2HBO	2 HydroxybutyrateNAD oxidoreductase	Propanoate metabolism
R_2HBt2_neg	74	1.06356	0.0674446	0.109256	2HBt2	2 hydroxybutyrate cotransport with proton	Transport, extracellular
R_2HBt2_pos	74	1.06356	0.0674446	0.109256	2HBt2	2 hydroxybutyrate cotransport with proton	Transport, extracellular
R_2HCO3_NAt_neg	29	-0.861516	0.130805	0.189642	2HCO3_NAt	Bicarbonate transport (Na/HCO3 1:2 cotransport)	Transport, extracellular
R_2HCO3_NAt_pos	30	-0.911162	0.151941	0.214831	2HCO3_NAt	Bicarbonate transport (Na/HCO3 1:2 cotransport)	Transport, extracellular
R_2HIBUPGLUC_Sitr_pos	83	1.54127	0.00969278	0.0304849	2HIBUPGLUC_Sitr	2HIBUPGLUC Sitr	Drug metabolism
R_2HIBUPGLUC_Sthv_pos	83	1.54127	0.00969278	0.0304849	2HIBUPGLUC_Sthv	Release of 2-hydroxy S-ibuprofen-glucuronide into hepatic vein	Drug metabolism
R_2HIBUP_Ritr_pos	79	1.36652	0.0250536	0.0536924	2HIBUP_Ritr	2HIBUP Ritr	Drug metabolism
R_2HIBUP_Rthv_pos	79	1.36652	0.0250536	0.0536924	2HIBUP_Rthv	Release of R-2-hydroxy-ibuprofen into hepatic vein	Drug metabolism
R_2HIBUP_SGLUhep_pos	83	1.54127	0.00969278	0.0304849	2HIBUP_SGLUhep	Glucuronidation of S-2-hydroxy ibuprofen	Drug metabolism
R_2HIBUP_Sitr_neg	79	1.39333	0.0250536	0.0536924	2HIBUP_Sitr	2HIBUP Sitr	Drug metabolism
R_2HIBUP_Sitr_pos	82	1.43618	0.0124673	0.0352696	2HIBUP_Sitr	2HIBUP Sitr	Drug metabolism
R_2HIBUP_Sthv_neg	79	1.39333	0.0250536	0.0536924	2HIBUP_Sthv	Release of S-2-hydroxy-ibuprofen into hepatic vein	Drug metabolism
R_2HIBUP_Sthv_pos	82	1.43618	0.0124673	0.0352696	2HIBUP_Sthv	Release of S-2-hydroxy-ibuprofen into hepatic vein	Drug metabolism
R_2HIVc_neg	75	1.21587	0.056192	0.0958446	2HIVc	Formation of 2-Hydroxy-Isovalerate	Valine, leucine, and isoleucine metabolism
R_2HIVc_pos	47	-0.171134	0.881984	0.896311	2HIVc	Formation of 2-Hydroxy-Isovalerate	Valine, leucine, and isoleucine metabolism
R_2HIVte_neg	75	1.21587	0.056192	0.0958446	2HIVte	Transport of 2-Hydroxy-Isovalerate	Transport, extracellular
R_2HIVte_pos	47	-0.171134	0.881984	0.896311	2HIVte	Transport of 2-Hydroxy-Isovalerate	Transport, extracellular
R_2HYDOGOAT3t_neg	73	0.405256	0.0804001	0.124359	2HYDOGOAT3t	Transport of 2-Hydroxy-Glutarate, Extracellular, Antiport	Transport, extracellular
R_2HYDOGte_pos	73	0.405256	0.0804001	0.124359	2HYDOGte	Transport of 2-Hydroxy-Glutarate, Extracellular	Transport, extracellular
R_2HYOXPLCte_pos	84	1.28833	0.00744225	0.0264329	2HYOXPLCte	2-Hydroxyphenylacetate Proton Symport, Cytosol	Transport, extracellular
R_2M3HBUc_pos	67	0.838059	0.201369	0.273076	2M3HBUc	Formation of 2-Methyl-3-Hydroxy-Butyrate	Valine, leucine, and isoleucine metabolism
R_2M3HBUte_pos	67	0.838059	0.201369	0.273076	2M3HBUte	Transport of 2-Methyl-3-Hydroxy-Butyrate, Extracellular	Transport, extracellular
R_2M3HBUtm_pos	67	0.838059	0.201369	0.273076	2M3HBUtm	Transport of 2-Methyl-3-Hydroxy-Butyrate, Mitochondrial	Transport, mitochondrial
R_2M3HVACc_pos	67	0.874855	0.201369	0.273076	2M3HVACc	Formation of 2-Methyl-3-Hydroxy-Valerate	Propanoate metabolism
R_2M3HVACte_pos	67	0.874855	0.201369	0.273076	2M3HVACte	Transport of 2-Methyl-3-Hydroxy-Valerate	Transport, extracellular
R_2M3OVACm_pos	67	0.874855	0.201369	0.273076	2M3OVACm	Formation of 2-Methyl-3-Oxo-Valerate	Propanoate metabolism
R_2M3OVACtm_pos	67	0.874855	0.201369	0.273076	2M3OVACtm	Transport of 2-Methyl-3-Oxo-Valerate, Mitochondrial	Transport, mitochondrial
R_2M3OVCOAm_pos	67	0.874855	0.201369	0.273076	2M3OVCOAm	Formation of 2-Methyl-3-Oxo-Valeryl Coa	Propanoate metabolism
R_2MB2COAc_pos	86	1.55195	0.0042391	0.0222853	2MB2COAc	Transport of 2-methylcrotonoyl-CoA into cytosol	Fatty acid oxidation
R_2MCITt_pos	53	0.0911564	0.823756	0.850386	2MCITt	2-methylcitrate transport via diffusion	Transport, extracellular
R_2MOPtm_pos	69	1.16721	0.151941	0.214831	2MOPtm	Transport of 2-Methyl-3-Oxopropanoate, Mitochondrial	Transport, mitochondrial
R_2OBUTt_neg	54	0.346563	0.766432	0.801003	2OBUTt	Transport by Monocarboxylate Transporter-2 into Extracellular Space	Transport, extracellular
R_2OBUTt_pos	80	1.42759	0.0200405	0.0465357	2OBUTt	Transport by Monocarboxylate Transporter-2 into Extracellular Space	Transport, extracellular
R_2OXOADOXm_pos	61	0.614486	0.411896	0.496012	2OXOADOXm	2-Oxoadipate:lipoamde 2-oxidoreductase(decarboxylating and acceptor-succinylating) (mitochondria)	Lysine metabolism
R_2OXOADPTm_neg	24	-0.661105	0.056192	0.0958446	2OXOADPTm	2-oxoadipate shuttle (cytosol/mitochondria)	Tryptophan metabolism
R_2OXOADPTm_pos	81	1.33045	0.0158966	0.0405158	2OXOADPTm	2-oxoadipate shuttle (cytosol/mitochondria)	Tryptophan metabolism
R_2OXOADPt_neg	77	1.27667	0.0381281	0.0718944	2OXOADPt	Transport of 2-Oxoadipate by Alpha-Ketoglutarate Antiport	Transport, extracellular
R_2OXOADPt_pos	58	0.395335	0.551631	0.629058	2OXOADPt	Transport of 2-Oxoadipate by Alpha-Ketoglutarate Antiport	Transport, extracellular
R_2PGtr_neg	83	1.46389	0.00969278	0.0304849	2PGtr	Transport of 2-Phospho-D-Glycerate	Transport, extracellular
R_2PGtr_pos	78	1.28565	0.0310312	0.0617975	2PGtr	Transport of 2-Phospho-D-Glycerate	Transport, extracellular
R_31DMThr_pos	77	1.29705	0.0381281	0.0718944	31DMThr	Demethylation of tacrolimus to 31-O-desmethyl tacrolimus in hepatocytes	Drug metabolism
R_31DMTitr_neg	77	1.29705	0.0381281	0.0718944	31DMTitr	31DMTitr	Drug metabolism
R_31DMTitr_pos	77	1.29705	0.0381281	0.0718944	31DMTitr	31DMTitr	Drug metabolism
R_31DMTtep_neg	90	1.69293	0.00115504	0.0123231	31DMTtep	Exit of 31-O-desmethyl tacrolimus into portal blood	Drug metabolism
R_31DMTtep_pos	77	1.29705	0.0381281	0.0718944	31DMTtep	Exit of 31-O-desmethyl tacrolimus into portal blood	Drug metabolism
R_31DMTtu_pos	90	1.69497	0.00115504	0.0123231	31DMTtu	Efflux of 31-O-desmethyl tacrolimus into intestinal lumen by ABC transporter	Drug metabolism
R_34DHALDD_pos	14	-1.49175	0.00565611	0.0245801	34DHALDD	Aldehyde dehydrogenase 3 4 dihydroxyphenylacetaldehyde NAD	Tyrosine metabolism
R_34DHOXMANDte_neg	69	0.965121	0.151941	0.214831	34DHOXMANDte	3, 4-Dihydroxymandelate Transport, Cytosol	Transport, extracellular
R_34DHOXMANDte_pos	76	1.2884	0.0464515	0.0828554	34DHOXMANDte	3, 4-Dihydroxymandelate Transport, Cytosol	Transport, extracellular
R_34DHOXPEGOX_neg	60	0.595077	0.456097	0.540863	34DHOXPEGOX	3,4-Dihydroxyphenylethyleneglycol NAD+ oxidoreductase	Tyrosine metabolism
R_34DHOXPEGOX_pos	83	1.36768	0.00969278	0.0304849	34DHOXPEGOX	3,4-Dihydroxyphenylethyleneglycol NAD+ oxidoreductase	Tyrosine metabolism
R_34DHOXPEGt_neg	60	0.595077	0.456097	0.540863	34DHOXPEGt	3,4-Dihydroxyphenylethyleneglycol transport (diffusion)	Transport, extracellular
R_34DHOXPEGt_pos	83	1.36768	0.00969278	0.0304849	34DHOXPEGt	3,4-Dihydroxyphenylethyleneglycol transport (diffusion)	Transport, extracellular
R_34DHPEAR_pos	80	1.32695	0.0200405	0.0465357	34DHPEAR	3, 4-Dihydroxyphenylethanol:NADP+ Reductase	Tyrosine metabolism
R_34DHPEt_neg	80	1.32695	0.0200405	0.0465357	34DHPEt	Transport of 3, 4-Dihydroxyphenylethanol via Passive Diffusion	Transport, extracellular
R_34DHPHAMT_pos	75	1.1803	0.056192	0.0958446	34DHPHAMT	3,4-Dihydroxyphenylacetate:amet O-methyltransferase	Tyrosine metabolism
R_34DHPHAte_neg	34	-0.615702	0.260979	0.340299	34DHPHAte	(3, 4-Dihydroxyphenyl)Acetate (Dopac) Transport, Cytosol	Transport, extracellular
R_34DHPHAte_pos	73	1.06234	0.0804001	0.124359	34DHPHAte	(3, 4-Dihydroxyphenyl)Acetate (Dopac) Transport, Cytosol	Transport, extracellular
R_34DHPHELAT1tc_pos	12	-1.72283	0.00314361	0.0195418	34DHPHELAT1tc	Transport of 3,4-Dihydroxy-L-phenylalanine by LAT1 in association with 4F2hc, across the apical surface of the memebranes.	Transport, extracellular
R_34DHPHEt_neg	12	-1.72283	0.00314361	0.0195418	34DHPHEt	3,4-Dihydroxy-L-phenylalanine transport	Transport, extracellular
R_34DHPHEt_pos	66	0.795097	0.229864	0.307805	34DHPHEt	3,4-Dihydroxy-L-phenylalanine transport	Transport, extracellular
R_34DHPLACOX_NADP_neg	14	-1.49175	0.00565611	0.0245801	34DHPLACOX_NADP	34DHPLACOX LPAREN NADP RPAREN	Tyrosine metabolism
R_34DHPLACOX_NADP_pos	72	0.893773	0.0951774	0.143538	34DHPLACOX_NADP	34DHPLACOX LPAREN NADP RPAREN	Tyrosine metabolism
R_34DHXMANDACOX_NADP_neg	14	-1.43944	0.00565611	0.0245801	34DHXMANDACOX_NADP	3,4-Dihydroxymandelaldehyde:NADP+ oxidoreductase	Tyrosine metabolism
R_34DHXMANDACOX_NADP_pos	72	1.24441	0.0951774	0.143538	34DHXMANDACOX_NADP	3,4-Dihydroxymandelaldehyde:NADP+ oxidoreductase	Tyrosine metabolism
R_34DHXMANDACOX_pos	14	-1.43944	0.00565611	0.0245801	34DHXMANDACOX	3,4-Dihydroxymandelaldehyde:NAD+ oxidoreductase	Tyrosine metabolism
R_34HPLFM_pos	78	1.15076	0.0310312	0.0617975	34HPLFM	3 4 hydroxyphenyl lactate formation	Ubiquinone synthesis
R_34HPLte_neg	89	1.29685	0.00164325	0.0139691	34HPLte	Transport of 3- (4-Hydroxyphenyl)Lactate	Transport, extracellular
R_34HPLte_pos	70	0.820417	0.130805	0.189642	34HPLte	Transport of 3- (4-Hydroxyphenyl)Lactate	Transport, extracellular
R_34HPLtm_neg	78	1.14857	0.0310312	0.0617975	34HPLtm	Transport of 3-(4-Hydroxyphenyl)Lactate, Mitochondrial	Transport, mitochondrial
R_34HPLtm_pos	76	0.913087	0.0464515	0.0828554	34HPLtm	Transport of 3-(4-Hydroxyphenyl)Lactate, Mitochondrial	Transport, mitochondrial
R_34HPPOR_pos	84	1.30563	0.00744225	0.0264329	34HPPOR	4 Hydroxyphenylpyruvateoxygen oxidoreductase	Tyrosine metabolism
R_34HPPte_neg	67	0.730204	0.201369	0.273076	34HPPte	Transport of 3-(4-hydroxyphenyl)pyruvate	Transport, extracellular
R_34HPPte_pos	76	1.27444	0.0464515	0.0828554	34HPPte	Transport of 3-(4-hydroxyphenyl)pyruvate	Transport, extracellular
R_35CGMPtn_pos	50	-0.0124949	1	1	35CGMPtn	35cGMP nuclear transport	Transport, nuclear
R_35DHPVShc_pos	81	1.41542	0.0158966	0.0405158	35DHPVShc	Conversion of pravastatin to 3-alpha-5-beta-dihydroxy pravastatin in entercoytes	Drug metabolism
R_35DHPVSitr_pos	81	1.41542	0.0158966	0.0405158	35DHPVSitr	35DHPVSitr	Drug metabolism
R_35DHPVStep_neg	97	1.52539	4.76304e-05	0.00769926	35DHPVStep	3-alpha-5-beta-dihydroxy pravastatin exit into portal blood	Drug metabolism
R_35DHPVStep_pos	99	1.64842	1.19076e-05	0.00431274	35DHPVStep	3-alpha-5-beta-dihydroxy pravastatin exit into portal blood	Drug metabolism
R_35DHPVSthc_neg	97	1.52539	4.76304e-05	0.00769926	35DHPVSthc	Uptake of 3-alpha-5-beta-dihydroxy pravastatin by hepatocytes	Drug metabolism
R_35DHPVSthc_pos	99	1.64842	1.19076e-05	0.00431274	35DHPVSthc	Uptake of 3-alpha-5-beta-dihydroxy pravastatin by hepatocytes	Drug metabolism
R_35DIODTYRte_neg	71	1.04449	0.111943	0.166021	35DIODTYRte	Transport of 3, 5-Diiodo-L-Tyrosine	Transport, extracellular
R_35DIODTYRte_pos	73	1.0411	0.0804001	0.124359	35DIODTYRte	Transport of 3, 5-Diiodo-L-Tyrosine	Transport, extracellular
R_35DSMVhep_pos	82	1.47104	0.0124673	0.0352696	35DSMVhep	Formation of 3,5-dihydrodoil simvastatin	Drug metabolism
R_35DSMVitr_pos	82	1.47104	0.0124673	0.0352696	35DSMVitr	35DSMVitr	Drug metabolism
R_35DSMVteb_pos	82	1.47104	0.0124673	0.0352696	35DSMVteb	Efflux of 3,5-dihydrodiol-simvastatin-lactone form into bile	Drug metabolism
R_3AIBSYMPt_neg	84	1.25742	0.00744225	0.0264329	3AIBSYMPt	3-Amino-Isobutyrate Transport, Sodium Symport	Transport, extracellular
R_3AIBSYMPt_pos	74	1.16663	0.0674446	0.109256	3AIBSYMPt	3-Amino-Isobutyrate Transport, Sodium Symport	Transport, extracellular
R_3AIBTm_pos	67	0.740512	0.201369	0.273076	3AIBTm	L-3-aminoisobutyrate transaminase, mitochondrial	Valine, leucine, and isoleucine metabolism
R_3AIB_Dtm_neg	75	1.06834	0.056192	0.0958446	3AIB_Dtm	Transport of 3aib D into mitochondria	Transport, mitochondrial
R_3AIB_Dtm_pos	37	-0.321721	0.370219	0.45494	3AIB_Dtm	Transport of 3aib D into mitochondria	Transport, mitochondrial
R_3AIBt1_neg	74	1.16663	0.0674446	0.109256	3AIBt1	3-Amino-Isobutyrate Transport, Proton Symport	Transport, extracellular
R_3AIBt1_pos	83	1.46189	0.00969278	0.0304849	3AIBt1	3-Amino-Isobutyrate Transport, Proton Symport	Transport, extracellular
R_3AIBt_pos	81	1.51164	0.0158966	0.0405158	3AIBt	3-amino-isobutyrate transport	Transport, extracellular
R_3AIBtm_pos	67	0.740512	0.201369	0.273076	3AIBtm	3-amino-isobutyrate transport, mitochondrial	Transport, mitochondrial
R_3ANTHRNtr_neg	79	1.17574	0.0250536	0.0536924	3ANTHRNtr	Transport of 3-Hydroxyanthranilate	Transport, extracellular
R_3ANTHRNtr_pos	76	1.27596	0.0464515	0.0828554	3ANTHRNtr	Transport of 3-Hydroxyanthranilate	Transport, extracellular
R_3DHCAS_pos	76	1.29593	0.0464515	0.0828554	3DHCAS	3-dehydrocholic acid formation	Bile acid synthesis
R_3DHCDCAS_pos	79	1.35866	0.0250536	0.0536924	3DHCDCAS	3-dehydro-chenodehydroxycholic acid formation	Bile acid synthesis
R_3DHCDCHOLabc_pos	86	1.60628	0.0042391	0.0222853	3DHCDCHOLabc	3-Dehydrochenodeoxycholic acid ABC bile acid transporter	Transport, extracellular
R_3DHCDCHOLt2_pos	61	0.0887791	0.411896	0.496012	3DHCDCHOLt2	3-Dehydrochenodeoxycholic acid transport via sodium cotransport	Transport, extracellular
R_3DHCDCHOLt_neg	61	0.0887791	0.411896	0.496012	3DHCDCHOLt	3-Dehydrochenodeoxycholic acid transport via bicarbonate countertransport	Transport, extracellular
R_3DHCDCHOLt_pos	85	1.60411	0.00565611	0.0245801	3DHCDCHOLt	3-Dehydrochenodeoxycholic acid transport via bicarbonate countertransport	Transport, extracellular
R_3DHCHOLabc_pos	86	1.60628	0.0042391	0.0222853	3DHCHOLabc	3-Dehydrocholic acid ABC bile acid transporter	Transport, extracellular
R_3DHCHOLt2_pos	61	0.0887791	0.411896	0.496012	3DHCHOLt2	3-Dehydrocholic acid transport via sodium cotransport	Transport, extracellular
R_3DHCHOLt_neg	61	0.0887791	0.411896	0.496012	3DHCHOLt	3-Dehydrocholic acid transport via bicarbonate countertransport	Transport, extracellular
R_3DHCHOLt_pos	85	1.60411	0.00565611	0.0245801	3DHCHOLt	3-Dehydrocholic acid transport via bicarbonate countertransport	Transport, extracellular
R_3DHDCAS_pos	76	1.30206	0.0464515	0.0828554	3DHDCAS	3-dehydro-deoxycholic acid formation	Bile acid synthesis
R_3DHDCAabc_pos	86	1.60746	0.0042391	0.0222853	3DHDCAabc	3-dehydro-deoxycholic acid ABC bile acid transporter	Transport, extracellular
R_3DHDCAt2_pos	61	0.0887791	0.411896	0.496012	3DHDCAt2	3-dehydro-deoxycholic acid transport via sodium cotransport	Transport, extracellular
R_3DHDCAt_neg	61	0.0887791	0.411896	0.496012	3DHDCAt	3-dehydro-deoxycholic acid transport via bicarbonate countertransport	Transport, extracellular
R_3DHDCAt_pos	86	1.60529	0.0042391	0.0222853	3DHDCAt	3-dehydro-deoxycholic acid transport via bicarbonate countertransport	Transport, extracellular
R_3DHLCAS_pos	78	1.34052	0.0310312	0.0617975	3DHLCAS	3-dehydro-lithocholic acid formation	Bile acid synthesis
R_3DHLCAabc_pos	86	1.60746	0.0042391	0.0222853	3DHLCAabc	3-dehydro-lithocholic acid ABC bile acid transporter	Transport, extracellular
R_3DHLCAt2_pos	61	0.0887791	0.411896	0.496012	3DHLCAt2	3-dehydro-lithocholic acid transport via sodium cotransport	Transport, extracellular
R_3DHLCAt_neg	61	0.0887791	0.411896	0.496012	3DHLCAt	3-dehydro-lithocholic acid transport via bicarbonate countertransport	Transport, extracellular
R_3DHLCAt_pos	86	1.60529	0.0042391	0.0222853	3DHLCAt	3-dehydro-lithocholic acid transport via bicarbonate countertransport	Transport, extracellular
R_3DPHBH1_pos	53	-0.00352519	0.823756	0.850386	3DPHBH1	Hydroxylation of 3-Decaprenyl-4-hydroxybenzoate (NADH)	Ubiquinone synthesis
R_3DPHBH2_pos	53	-0.00147849	0.823756	0.850386	3DPHBH2	Hydroxylation of 3-Decaprenyl-4-hydroxybenzoate (NADPH)	Ubiquinone synthesis
R_3DSPHR_pos	33	-0.709568	0.229864	0.307805	3DSPHR	3 Dehydrosphinganine reductase	Sphingolipid metabolism
R_3H3MGLTc_pos	86	1.58523	0.0042391	0.0222853	3H3MGLTc	Formation of 3-Hydroxy-3-Methyl-Glutarate	Valine, leucine, and isoleucine metabolism
R_3H3MGLTte_pos	86	1.58523	0.0042391	0.0222853	3H3MGLTte	Transport of 3-Hydroxy-3-Methyl-Glutarate	Transport, extracellular
R_3HADICOAx_pos	88	1.81135	0.00228626	0.0165261	3HADICOAx	Formation of 3-Hydroxy-Adipoyl Coa	Fatty acid oxidation
R_3HADPACte_pos	88	1.81135	0.00228626	0.0165261	3HADPACte	Transport of 3-Hydroxy-Adipate, Extracellular	Transport, extracellular
R_3HADPACtxc_pos	88	1.81135	0.00228626	0.0165261	3HADPACtxc	Transport of 3-Hydroxy-Adipate, Peroxisomal	Transport, peroxisomal
R_3HADPACx_pos	88	1.81135	0.00228626	0.0165261	3HADPACx	Formation of 3-Hydroxy-Adipate	Fatty acid oxidation
R_3HAO_pos	78	1.28919	0.0310312	0.0617975	3HAO	3 hydroxyanthranilate 3 4 dioxygenase	Tryptophan metabolism
R_3HBCDm_pos	84	1.50485	0.00744225	0.0264329	3HBCDm	3-hydroxybutyryl-CoA dehydratase, mitochondrial	Butanoate metabolism
R_3HBCOAHLm_pos	65	0.573111	0.260979	0.340299	3HBCOAHLm	3-hydroxyisobutyryl-CoA hydrolase, mitochondrial	Valine, leucine, and isoleucine metabolism
R_3HBCOARc_pos	84	1.50485	0.00744225	0.0264329	3HBCOARc	Transport of (R)-3-hydroxybutanoyl-CoA into cytosol	Fatty acid oxidation
R_3HCO3_NAt_neg	32	-0.733415	0.201369	0.273076	3HCO3_NAt	Bicarbonate transport (Na/HCO3 1:3 cotransport)	Transport, extracellular
R_3HCO3_NAt_pos	32	-0.805201	0.201369	0.273076	3HCO3_NAt	Bicarbonate transport (Na/HCO3 1:3 cotransport)	Transport, extracellular
R_3HGLUTCOAm_pos	81	1.3382	0.0158966	0.0405158	3HGLUTCOAm	Acyl Coenzyme A Dehydrogenase for Glutaryl Coenzyme A, Forming 3-Hydroxy-Glutaryl Coenzyme A	Lysine metabolism
R_3HIBUPGLUC_Sitr_pos	83	1.54127	0.00969278	0.0304849	3HIBUPGLUC_Sitr	3HIBUPGLUC Sitr	Drug metabolism
R_3HIBUPGLUC_Sthv_pos	83	1.54127	0.00969278	0.0304849	3HIBUPGLUC_Sthv	Release of 3-hydroxy S-ibuprofen-glucuronide into hepatic vein	Drug metabolism
R_3HIBUP_Ritr_pos	79	1.36652	0.0250536	0.0536924	3HIBUP_Ritr	3HIBUP Ritr	Drug metabolism
R_3HIBUP_Rthv_neg	78	1.32979	0.0310312	0.0617975	3HIBUP_Rthv	Release of R-3-hydroxy-ibuprofen into hepatic vein	Drug metabolism
R_3HIBUP_Rthv_pos	79	1.36652	0.0250536	0.0536924	3HIBUP_Rthv	Release of R-3-hydroxy-ibuprofen into hepatic vein	Drug metabolism
R_3HIBUP_SGLUhep_pos	83	1.54127	0.00969278	0.0304849	3HIBUP_SGLUhep	Glucuronidation of S-3-hydroxy ibuprofen	Drug metabolism
R_3HIBUP_Sitr_neg	79	1.39333	0.0250536	0.0536924	3HIBUP_Sitr	3HIBUP Sitr	Drug metabolism
R_3HIBUP_Sitr_pos	82	1.43618	0.0124673	0.0352696	3HIBUP_Sitr	3HIBUP Sitr	Drug metabolism
R_3HIBUP_Sthv_neg	78	1.32979	0.0310312	0.0617975	3HIBUP_Sthv	Release of S-3-hydroxy-ibuprofen into hepatic vein	Drug metabolism
R_3HIBUP_Sthv_pos	82	1.43618	0.0124673	0.0352696	3HIBUP_Sthv	Release of S-3-hydroxy-ibuprofen into hepatic vein	Drug metabolism
R_3HIVAcm_pos	73	1.09918	0.0804001	0.124359	3HIVAcm	Formation of 3-Hydroxy-Isovalerate	Valine, leucine, and isoleucine metabolism
R_3HIVActe_pos	73	1.09918	0.0804001	0.124359	3HIVActe	Transport of 3-Hydroxy-Isovalerate, Extracellular	Transport, extracellular
R_3HIVActm_pos	73	1.09918	0.0804001	0.124359	3HIVActm	Transport of 3-Hydroxy-Isovalerate, Mitochondrial	Transport, mitochondrial
R_3HKYNAKGAT_pos	72	0.567591	0.0951774	0.143538	3HKYNAKGAT	3-Hydroxy-L-kynurenine:2-oxoglutarate aminotransferase	Tryptophan metabolism
R_3HLVSTAChep_pos	82	1.42012	0.0124673	0.0352696	3HLVSTAChep	Conversion of 3-hydroxy-lovastatin lactone to acid form	Drug metabolism
R_3HLVSTACtbc_pos	82	1.42012	0.0124673	0.0352696	3HLVSTACtbc	Release of 3-hydroxy-lovastatin acid form into bile	Drug metabolism
R_3HLVSTitr_pos	82	1.42012	0.0124673	0.0352696	3HLVSTitr	3HLVSTitr	Drug metabolism
R_3HLYTCL_pos	70	0.934264	0.130805	0.189642	3HLYTCL	3-Hydroxy-L-tyrosine carboxy-lyase	Tyrosine metabolism
R_3HMPtd_pos	71	0.98688	0.111943	0.166021	3HMPtd	Transport of 3-Hydroxy-2-Methylpropanoate, Diffusion	Transport, extracellular
R_3HMPtm_pos	71	0.98688	0.111943	0.166021	3HMPtm	Transport of 3-Hydroxy-Isobutyrate, Mitochondrial	Transport, mitochondrial
R_3HPPNOHGLUCte_pos	76	1.25893	0.0464515	0.0828554	3HPPNOHGLUCte	Transport of 3- (3-Hydroxy-Phenyl)Propionate Hydroxy Derivative Glucuronide into Urine	Transport, extracellular
R_3HPPPNOHGLUCc_pos	76	1.25893	0.0464515	0.0828554	3HPPPNOHGLUCc	Glucuronidation of 3- (3-Hydroxyphenyl)Propionate Hydroxy Derivative	Phenylalanine metabolism
R_3HPPPNOHc_pos	76	1.25893	0.0464515	0.0828554	3HPPPNOHc	Hydroxylation of 3- (3-Hydroxyphenyl)Propionate	Phenylalanine metabolism
R_3HPPt_neg	86	1.52461	0.0042391	0.0222853	3HPPt	Transpot of 3-Hydroxypropionate	Transport, extracellular
R_3HPPt_pos	65	0.688846	0.260979	0.340299	3HPPt	Transpot of 3-Hydroxypropionate	Transport, extracellular
R_3HPPtm_neg	65	0.688846	0.260979	0.340299	3HPPtm	Transport of 3-Hydroxypropionate, Mitochondrial	Transport, mitochondrial
R_3HPPtm_pos	86	1.52461	0.0042391	0.0222853	3HPPtm	Transport of 3-Hydroxypropionate, Mitochondrial	Transport, mitochondrial
R_3HPVSCOAhc_pos	84	1.6448	0.00744225	0.0264329	3HPVSCOAhc	3HPVSCOAhc	Drug metabolism
R_3HPVSCOAitm_neg	84	1.54604	0.00744225	0.0264329	3HPVSCOAitm	3HPVSCOAitm	Drug metabolism
R_3HPVSCOAitx_pos	88	1.8344	0.00228626	0.0165261	3HPVSCOAitx	3HPVSCOAitx	Drug metabolism
R_3HPVSTETCOAhcm_pos	84	1.54604	0.00744225	0.0264329	3HPVSTETCOAhcm	Beta oxidation of 3-S-hydroxy-pravastatin-CoA to tatranor-CoA derivative in hepatocytes, mitochondria	Drug metabolism
R_3HPVSTETCOAhcx_pos	88	1.8344	0.00228626	0.0165261	3HPVSTETCOAhcx	Beta oxidation of 3-S-hydroxy-pravastatin-CoA to tetranor-CoA in hepatocytes, peroxisomes	Drug metabolism
R_3HPVSTETCOAitm_pos	84	1.54604	0.00744225	0.0264329	3HPVSTETCOAitm	3HPVSTETCOAitm	Drug metabolism
R_3HPVSTETCOAitx_pos	88	1.8344	0.00228626	0.0165261	3HPVSTETCOAitx	3HPVSTETCOAitx	Drug metabolism
R_3HPVSTEThc_pos	84	1.6448	0.00744225	0.0264329	3HPVSTEThc	3HPVSTEThc	Drug metabolism
R_3HPVSTETteb_pos	90	1.80847	0.00115504	0.0123231	3HPVSTETteb	Efflux of 3-S-hydroxy-pravastatin-tetranor into bile	Drug metabolism
R_3HPVSTETtev_neg	90	1.80796	0.00115504	0.0123231	3HPVSTETtev	Exit of 3-S-hydroxy-pravastatin-tetranor into hepatic vein	Drug metabolism
R_3HPVSTETtev_pos	84	1.6448	0.00744225	0.0264329	3HPVSTETtev	Exit of 3-S-hydroxy-pravastatin-tetranor into hepatic vein	Drug metabolism
R_3HPVShc_pos	66	0.775747	0.229864	0.307805	3HPVShc	Oxidation of pravastatin to 3-hydroxy pravastatin in hepatocytes	Drug metabolism
R_3HPVSitr_pos	66	0.775747	0.229864	0.307805	3HPVSitr	3HPVSitr	Drug metabolism
R_3HPVSteb_pos	77	1.1121	0.0381281	0.0718944	3HPVSteb	Efflux of 3-S-hydroxy-pravastatin into bile	Drug metabolism
R_3HPVStep_neg	97	1.52539	4.76304e-05	0.00769926	3HPVStep	3-hydroxy pravastatin exit into portal blood	Drug metabolism
R_3HPVStep_pos	99	1.64842	1.19076e-05	0.00431274	3HPVStep	3-hydroxy pravastatin exit into portal blood	Drug metabolism
R_3HPVSthc_neg	97	1.52539	4.76304e-05	0.00769926	3HPVSthc	Uptake of 3-hydroxy pravastatin by hepatocytes	Drug metabolism
R_3HPVSthc_pos	99	1.64842	1.19076e-05	0.00431274	3HPVSthc	Uptake of 3-hydroxy pravastatin by hepatocytes	Drug metabolism
R_3HSMVACIDhep_pos	84	1.47767	0.00744225	0.0264329	3HSMVACIDhep	Conversion of 3-hydroxy simvastatin lactone to acid form	Drug metabolism
R_3HSMVACIDteb_pos	84	1.47767	0.00744225	0.0264329	3HSMVACIDteb	Efflux of 3-hydroxy-simvastatin-acid form into bile	Drug metabolism
R_3HSMVhep_pos	84	1.47767	0.00744225	0.0264329	3HSMVhep	Acid catalyzed rearrangement of 6-beta-hydroxy-simvastatin to 3-hydroxy simvastatin	Drug metabolism
R_3HSMVitr_pos	84	1.47767	0.00744225	0.0264329	3HSMVitr	3HSMVitr	Drug metabolism
R_3ISPVShc_pos	86	1.49658	0.0042391	0.0222853	3ISPVShc	Isomerization of pravastatin to 3-alpha-iso-pravastatin in hepatocytes	Drug metabolism
R_3ISPVSitr_neg	80	1.37931	0.0200405	0.0465357	3ISPVSitr	3ISPVSitr	Drug metabolism
R_3ISPVSteb_pos	77	1.1121	0.0381281	0.0718944	3ISPVSteb	Efflux of 3-alpha-iso-pravastatin into bile	Drug metabolism
R_3ISPVStep_neg	97	1.52539	4.76304e-05	0.00769926	3ISPVStep	3-alpha-iso-pravastatin exit into portal blood	Drug metabolism
R_3ISPVStep_pos	99	1.64842	1.19076e-05	0.00431274	3ISPVStep	3-alpha-iso-pravastatin exit into portal blood	Drug metabolism
R_3ISPVSthc_neg	97	1.52539	4.76304e-05	0.00769926	3ISPVSthc	Uptake of 3-alpha-iso-pravastatin by hepatocytes	Drug metabolism
R_3ISPVSthc_pos	99	1.64842	1.19076e-05	0.00431274	3ISPVSthc	Uptake of 3-alpha-iso-pravastatin by hepatocytes	Drug metabolism
R_3ITYR_Lte_neg	65	0.838141	0.260979	0.340299	3ITYR_Lte	Transport of 3-Iodo-L-Tyrosine	Transport, extracellular
R_3ITYR_Lte_pos	73	1.05653	0.0804001	0.124359	3ITYR_Lte	Transport of 3-Iodo-L-Tyrosine	Transport, extracellular
R_3M4HDXPAC_pos	76	1.20349	0.0464515	0.0828554	3M4HDXPAC	3-Methoxy-4-hydroxyphenylacetaldehyde:NAD+ oxidoreductase	Tyrosine metabolism
R_3MEACMPhc_pos	84	1.53266	0.00744225	0.0264329	3MEACMPhc	Formation of 3-methoxy-acetaminophen in hepatocytes	Drug metabolism
R_3MEACMPitr_pos	79	1.2397	0.0250536	0.0536924	3MEACMPitr	3MEACMPitr	Drug metabolism
R_3MGLUTACc_pos	86	1.40458	0.0042391	0.0222853	3MGLUTACc	Formation of 3-Methyl-Glutaconate	Valine, leucine, and isoleucine metabolism
R_3MGLUTACte_pos	86	1.40458	0.0042391	0.0222853	3MGLUTACte	Transport of 3-Methyl-Glutaconate, Extracellular	Transport, extracellular
R_3MGLUTACtm_pos	86	1.40458	0.0042391	0.0222853	3MGLUTACtm	Transport of 3-Methyl-Glutaconate, Mitochondrial	Transport, mitochondrial
R_3MGLUTRc_pos	86	1.42253	0.0042391	0.0222853	3MGLUTRc	Formation of 3-Methyl-Glutarate	Valine, leucine, and isoleucine metabolism
R_3MGLUTRte_pos	86	1.42253	0.0042391	0.0222853	3MGLUTRte	Transport of 3-Methyl-Glutarate	Transport, extracellular
R_3MHISc_neg	78	1.33807	0.0310312	0.0617975	3MHISc	Formation of Methyl-Histidine	Histidine metabolism
R_3MHISc_pos	72	1.00577	0.0951774	0.143538	3MHISc	Formation of Methyl-Histidine	Histidine metabolism
R_3MHISt1_neg	82	1.32263	0.0124673	0.0352696	3MHISt1	Transport of Methyl-Histidine by System N Transport	Transport, extracellular
R_3MHISt1_pos	73	1.22641	0.0804001	0.124359	3MHISt1	Transport of Methyl-Histidine by System N Transport	Transport, extracellular
R_3MHISt2_neg	53	0.225971	0.823756	0.850386	3MHISt2	Transport of Methyl-Histidine by System L Transport (Lat1)	Transport, extracellular
R_3MHISt2_pos	74	1.23743	0.0674446	0.109256	3MHISt2	Transport of Methyl-Histidine by System L Transport (Lat1)	Transport, extracellular
R_3MHISt3_neg	69	0.853298	0.151941	0.214831	3MHISt3	Transport of Methyl-Histidine by System L Transport (Lat2)	Transport, extracellular
R_3MHISt3_pos	73	1.22708	0.0804001	0.124359	3MHISt3	Transport of Methyl-Histidine by System L Transport (Lat2)	Transport, extracellular
R_3MLDAt_pos	72	0.973385	0.0951774	0.143538	3MLDAt	3MLDA extracellular transport via diffusion	Transport, extracellular
R_3MOBt2im_pos	20	-1.08568	0.0250536	0.0536924	3MOBt2im	3-methyl-2-oxobutanoate mitochondrial transport via proton symport	Transport, mitochondrial
R_3MOBte_neg	41	-0.290395	0.551631	0.629058	3MOBte	Transport of 3-methyl-2-oxobutanoate	Transport, extracellular
R_3MOBte_pos	72	0.90058	0.0951774	0.143538	3MOBte	Transport of 3-methyl-2-oxobutanoate	Transport, extracellular
R_3MOPt2im_pos	20	-1.08568	0.0250536	0.0536924	3MOPt2im	3-Methyl-2-oxopentanoate mitochondrial transport via proton symport	Transport, mitochondrial
R_3MOPt_neg	48	-0.151119	0.940843	0.950233	3MOPt	3mop reversible trasport	Transport, extracellular
R_3MOPt_pos	72	0.90623	0.0951774	0.143538	3MOPt	3mop reversible trasport	Transport, extracellular
R_3MOX4HOXMte_pos	80	1.33612	0.0200405	0.0465357	3MOX4HOXMte	Transport 3-Methoxy-4-Hydroxymandelate, Extracellular	Transport, extracellular
R_3MOX4HOXPGALDOX_NADP_neg	4	-2.06874	0.000142891	0.00812649	3MOX4HOXPGALDOX_NADP	3-Methoxy-4-hydroxyphenylglycolaldehyde:NADP+ oxidoreductase	Tyrosine metabolism
R_3MOX4HOXPGALDOX_NADP_pos	70	1.15263	0.130805	0.189642	3MOX4HOXPGALDOX_NADP	3-Methoxy-4-hydroxyphenylglycolaldehyde:NADP+ oxidoreductase	Tyrosine metabolism
R_3MOX4HOXPGALDOX_pos	4	-2.06874	0.000142891	0.00812649	3MOX4HOXPGALDOX	3-Methoxy-4-hydroxyphenylglycolaldehyde:NAD+ oxidoreductase	Tyrosine metabolism
R_3MOXTYRESSte_pos	90	1.6813	0.00115504	0.0123231	3MOXTYRESSte	3-Methoxytyramine secretion via secretory vesicle (ATP driven)	Transport, extracellular
R_3MOXTYROX_pos	76	1.20349	0.0464515	0.0828554	3MOXTYROX	3-Methoxytyramine:oxygen oxidoreductase (deaminating)	Tyrosine metabolism
R_3MOXTYRt_neg	90	1.66285	0.00115504	0.0123231	3MOXTYRt	Transport of 3-Methoxytyramine, Diffusion	Transport, extracellular
R_3MOXTYRt_pos	77	1.15448	0.0381281	0.0718944	3MOXTYRt	Transport of 3-Methoxytyramine, Diffusion	Transport, extracellular
R_3MTPte_pos	71	0.868961	0.111943	0.166021	3MTPte	Secretion of 3-Methyl-Thio-Propionate	Transport, extracellular
R_3OHACMPhr_pos	82	1.41593	0.0124673	0.0352696	3OHACMPhr	Oxidation of acetaminophen to 3-OH-acetaminophen in hepatocytes	Drug metabolism
R_3OHACMPitr_neg	82	1.41593	0.0124673	0.0352696	3OHACMPitr	3OHACMPitr	Drug metabolism
R_3OHACMPtev_pos	82	1.41593	0.0124673	0.0352696	3OHACMPtev	Efflux of 3-OH-acetaminophen into hepatic vein	Drug metabolism
R_3OHGLUTACOAT3t_neg	73	0.405256	0.0804001	0.124359	3OHGLUTACOAT3t	Transport of 3-Hydroxy-Glutarate, Extracellular, Antiport	Transport, extracellular
R_3OHGLUTACOAT3t_pos	80	1.30704	0.0200405	0.0465357	3OHGLUTACOAT3t	Transport of 3-Hydroxy-Glutarate, Extracellular, Antiport	Transport, extracellular
R_3OHGLUTACm_pos	81	1.3382	0.0158966	0.0405158	3OHGLUTACm	Formation of 3-Hydroxy-Glutarate	Lysine metabolism
R_3OHGLUTACte_pos	73	0.405256	0.0804001	0.124359	3OHGLUTACte	Transport of 3-Hydroxy-Glutarate, Extracellular	Transport, extracellular
R_3OHGLUTACtm_pos	81	1.3382	0.0158966	0.0405158	3OHGLUTACtm	Transport of 3-Hydroxy-Glutarate, Mitochondrial	Transport, mitochondrial
R_3OHSEBACte_pos	88	1.70035	0.00228626	0.0165261	3OHSEBACte	Transport of 3-Hydroxy-Sebacic Acid, Extracellular	Transport, extracellular
R_3OHSEBACtxc_pos	88	1.70035	0.00228626	0.0165261	3OHSEBACtxc	Transportof 3-Hydroxy-Sebacic Acid, Peroxisomal	Transport, peroxisomal
R_3OHSEBACx_pos	88	1.70035	0.00228626	0.0165261	3OHSEBACx	Formation of 3-Hydroxy-Sebacic Acid	Fatty acid oxidation
R_3OHSEBCOAx_pos	88	1.70035	0.00228626	0.0165261	3OHSEBCOAx	Formation of 3-Hydroxy-Sebacoyl Coa	Fatty acid oxidation
R_3OHSUBACte_pos	88	1.77983	0.00228626	0.0165261	3OHSUBACte	Transport of 3-Hydoxy-Suberic Acid, Extracellular	Transport, extracellular
R_3OHSUBACtxc_pos	88	1.77983	0.00228626	0.0165261	3OHSUBACtxc	Transport of 3-Hydoxy-Suberic Acid, Peroxisomal	Transport, peroxisomal
R_3OHSUBACx_pos	88	1.77983	0.00228626	0.0165261	3OHSUBACx	Formation of 3-Hydoxy-Suberic Acid	Fatty acid oxidation
R_3OHSUBCOAx_pos	88	1.77983	0.00228626	0.0165261	3OHSUBCOAx	Formation of 3-Hydoxy-Suberyl Coa	Fatty acid oxidation
R_3PGtr_neg	83	1.46161	0.00969278	0.0304849	3PGtr	Transport of 3-Phospho-D-Glycerate	Transport, extracellular
R_3PGtr_pos	78	1.28565	0.0310312	0.0617975	3PGtr	Transport of 3-Phospho-D-Glycerate	Transport, extracellular
R_3SALAASPm_neg	64	0.709289	0.294725	0.375028	3SALAASPm	Cysteinesulfinate-aspartate mitochondrial shuttle	Transport, mitochondrial
R_3SALACBOXL_cho_pos	78	1.19516	0.0310312	0.0617975	3SALACBOXL_cho	3-Sulfino-L-alanine carboxy-lyase	Taurine and hypotaurine metabolism
R_3SALAOX_pos	82	1.33367	0.0124673	0.0352696	3SALAOX	Cysteinesulfinic acid oxidase	Taurine and hypotaurine metabolism
R_3SALATAi_pos	83	1.22448	0.00969278	0.0304849	3SALATAi	3-sulfino-alanine transaminase (irreversible)	Methionine and cysteine metabolism
R_3SALATAim_pos	84	1.42846	0.00744225	0.0264329	3SALATAim	3-sulfino-alanine transaminase (irreversible), mitochondrial	Methionine and cysteine metabolism
R_3SPYRSP_pos	83	1.22448	0.00969278	0.0304849	3SPYRSP	3-sulfinopyruvate hydrolase (spotaneous reaction)	Methionine and cysteine metabolism
R_3SPYRSPm_pos	84	1.42846	0.00744225	0.0264329	3SPYRSPm	3-sulfinopyruvate hydrolase (spotaneous reaction), mitochondrial	Methionine and cysteine metabolism
R_3UIBtd_neg	82	1.19982	0.0124673	0.0352696	3UIBtd	Transport of 3-Ureidoisobutyrate, Diffusion	Transport, extracellular
R_3UIBtd_pos	60	0.439953	0.456097	0.540863	3UIBtd	Transport of 3-Ureidoisobutyrate, Diffusion	Transport, extracellular
R_41R1H2MAE12BOOX_pos	80	1.352	0.0200405	0.0465357	41R1H2MAE12BOOX	4-[(1R)-1-Hydroxy-2-(methylamino)ethyl]-1,2-benzenediol:oxygen oxidoreductase(deaminating)(flavin-containing)	Tyrosine metabolism
R_41R2A1H12BOOX_pos	83	1.36982	0.00969278	0.0304849	41R2A1H12BOOX	4-[(1R)-2-Amino-1-hydroxyethyl]-1,2-benzenediol:oxygen oxidoreductase(deaminating)(flavin-containing)	Tyrosine metabolism
R_42A12BOOX_pos	83	1.33278	0.00969278	0.0304849	42A12BOOX	4-(2-Aminoethyl)-1,2-benzenediol:oxygen oxidoreductase(deaminating)(flavin-containing)	Tyrosine metabolism
R_4AABUTNt_neg	88	1.66705	0.00228626	0.0165261	4AABUTNt	Diffusion of 4-Acetamidobutanoate	Transport, extracellular
R_4ABUTtcn_pos	79	1.21004	0.0250536	0.0536924	4ABUTtcn	Transport of GABA	Transport, nuclear
R_4ABUTtm_neg	68	0.817401	0.175411	0.24229	4ABUTtm	4 aminobutanoate mitochondrial transport via diffusion	Transport, mitochondrial
R_4ABUTtm_pos	80	1.27616	0.0200405	0.0465357	4ABUTtm	4 aminobutanoate mitochondrial transport via diffusion	Transport, mitochondrial
R_4BHGLZABCt_pos	90	1.69497	0.00115504	0.0123231	4BHGLZABCt	Excretion of 4-beta-OH-gliclazide into bile	Drug metabolism
R_4BHGLZhr_pos	79	1.35299	0.0250536	0.0536924	4BHGLZhr	Oxidation of gliclazide to 4-beta-OH-gliclazide in hepatocytes	Drug metabolism
R_4BHGLZitr_pos	79	1.35299	0.0250536	0.0536924	4BHGLZitr	4BHGLZitr	Drug metabolism
R_4BHGLZtev_neg	90	1.69497	0.00115504	0.0123231	4BHGLZtev	Excretion of 4-beta-OH-gliclazide into hepatic vein	Drug metabolism
R_4BHGLZtev_pos	79	1.35299	0.0250536	0.0536924	4BHGLZtev	Excretion of 4-beta-OH-gliclazide into hepatic vein	Drug metabolism
R_4CMCOAS_pos	81	1.44305	0.0158966	0.0405158	4CMCOAS	4-Coumarate:Coa Ligase (AMP-Forming)	Phenylalanine metabolism
R_4GLU56DIHDINDt_pos	78	1.17051	0.0310312	0.0617975	4GLU56DIHDINDt	Transport of 4-S-Glutathionyl-5, 6-Dihydroxyindoline	Transport, extracellular
R_4HALDD_pos	4	-2.06874	0.000142891	0.00812649	4HALDD	Aldehyde dehydrogenase 4 hydroxyphenylacetaldehyde NAD	Phenylalanine metabolism
R_4HATVACIDOXDhc_pos	85	1.50517	0.00565611	0.0245801	4HATVACIDOXDhc	Oxidation of atorvastatin acid to 4-hydroxy-atorvastatin-acid in hepatocytes	Drug metabolism
R_4HATVACIDhc_pos	75	1.23759	0.056192	0.0958446	4HATVACIDhc	Conversion of 4-hydroxy-atorvastatin-lactone to its acid form in hepatocytes	Drug metabolism
R_4HATVACIDitr_pos	85	1.50517	0.00565611	0.0245801	4HATVACIDitr	4HATVACIDitr	Drug metabolism
R_4HATVACIDteb_pos	75	0.997182	0.056192	0.0958446	4HATVACIDteb	Efflux of 4-hydroxy-atorvastatin-acid into bile	Drug metabolism
R_4HATVACIDtep_neg	97	1.52539	4.76304e-05	0.00769926	4HATVACIDtep	Efflux of 4-hydroxy-atorvastatin-acid into portal blood	Drug metabolism
R_4HATVACIDtep_pos	99	1.64842	1.19076e-05	0.00431274	4HATVACIDtep	Efflux of 4-hydroxy-atorvastatin-acid into portal blood	Drug metabolism
R_4HATVACIDthc_neg	97	1.52539	4.76304e-05	0.00769926	4HATVACIDthc	Uptake of 4-hydroxy-atorvastatin-acid into hepatocytes	Drug metabolism
R_4HATVACIDthc_pos	99	1.64842	1.19076e-05	0.00431274	4HATVACIDthc	Uptake of 4-hydroxy-atorvastatin-acid into hepatocytes	Drug metabolism
R_4HATVLACOXDhc_pos	83	1.50899	0.00969278	0.0304849	4HATVLACOXDhc	Oxidation of atorvastatin lactone to 4-hydroxy-atorvastatin-lactone in hepatocytes	Drug metabolism
R_4HATVLAChc_pos	75	1.23823	0.056192	0.0958446	4HATVLAChc	Conversion of 4-hydroxy-atorvastatin-lactone to its acid form in hepatocytes	Drug metabolism
R_4HATVLACitr_pos	83	1.50899	0.00969278	0.0304849	4HATVLACitr	4HATVLACitr	Drug metabolism
R_4HATVLACteb_pos	75	0.997182	0.056192	0.0958446	4HATVLACteb	Efflux of 4-hydroxy-atorvastatin-lactone into bile	Drug metabolism
R_4HATVLACtep_neg	97	1.52539	4.76304e-05	0.00769926	4HATVLACtep	Efflux of 4-hydroxy-atorvastatin-lactone into portal blood	Drug metabolism
R_4HATVLACtep_pos	99	1.64842	1.19076e-05	0.00431274	4HATVLACtep	Efflux of 4-hydroxy-atorvastatin-lactone into portal blood	Drug metabolism
R_4HATVLACthc_neg	97	1.52539	4.76304e-05	0.00769926	4HATVLACthc	Uptake of 4-hydroxy-atorvastatin-lactone into hepatocytes	Drug metabolism
R_4HATVLACthc_pos	99	1.64842	1.19076e-05	0.00431274	4HATVLACthc	Uptake of 4-hydroxy-atorvastatin-lactone into hepatocytes	Drug metabolism
R_4HBZCOAFm_pos	88	1.67943	0.00228626	0.0165261	4HBZCOAFm	4 hydroxybenzoyl CoA formation	Ubiquinone synthesis
R_4HBZFm_pos	88	1.67943	0.00228626	0.0165261	4HBZFm	4 hydroxybenzoate formation	Ubiquinone synthesis
R_4HBZte_pos	82	1.4633	0.0124673	0.0352696	4HBZte	Transport of 4-Hydroxybenzoate, Extracellular Space	Transport, extracellular
R_4HBZtm_neg	88	1.67943	0.00228626	0.0165261	4HBZtm	4 Hydroxybenzoate mitochondrial transport	Transport, mitochondrial
R_4HBZtm_pos	53	0.0031402	0.823756	0.850386	4HBZtm	4 Hydroxybenzoate mitochondrial transport	Transport, mitochondrial
R_4HDEBRISOQUINEte_neg	81	1.36875	0.0158966	0.0405158	4HDEBRISOQUINEte	Xenobiotic transport	Transport, extracellular
R_4HGLSDm_pos	57	0.438026	0.602679	0.673269	4HGLSDm	L 4 hydroxyglutamate semialdehyde dehydrogenase mitochondrial	Arginine and proline metabolism
R_4HMDGLUCitr_pos	82	1.50648	0.0124673	0.0352696	4HMDGLUCitr	4HMDGLUCitr	Drug metabolism
R_4HMDGLUCtev_pos	82	1.50648	0.0124673	0.0352696	4HMDGLUCtev	Efflux of 4-OH-midazolam-glucuronide into hepatic vein	Drug metabolism
R_4HMDZGLUChr_pos	82	1.50648	0.0124673	0.0352696	4HMDZGLUChr	Glucuronidation of 4-OH-midazolam in enterocytes	Drug metabolism
R_4HOXPACDOX_NADP_neg	4	-2.06874	0.000142891	0.00812649	4HOXPACDOX_NADP	4HOXPACDOX LPAREN NADP RPAREN	Tyrosine metabolism
R_4HOXPACDOX_NADP_pos	79	1.26764	0.0250536	0.0536924	4HOXPACDOX_NADP	4HOXPACDOX LPAREN NADP RPAREN	Tyrosine metabolism
R_4HPROLTASCT1_pos	11	-1.57582	0.00228626	0.0165261	4HPROLTASCT1	Exit of hydroxy-proline across the basolateral surface of enterocytes	Transport, extracellular
R_4HPRO_LTte_neg	76	0.926924	0.0464515	0.0828554	4HPRO_LTte	Transport of trans-4-hydroxy-L-proline	Transport, extracellular
R_4HPRO_LTte_pos	67	0.448083	0.201369	0.273076	4HPRO_LTte	Transport of trans-4-hydroxy-L-proline	Transport, extracellular
R_4MOPt2im_pos	20	-1.08568	0.0250536	0.0536924	4MOPt2im	4-methyl-2-oxopentanoate mitochondrial transport via proton symport	Transport, mitochondrial
R_4MOPte_neg	42	-0.289426	0.602679	0.673269	4MOPte	Transport of 4-methyl-2-oxopentanoate	Transport, extracellular
R_4MOPte_pos	58	0.25004	0.551631	0.629058	4MOPte	Transport of 4-methyl-2-oxopentanoate	Transport, extracellular
R_4MPTNLte_pos	81	1.30123	0.0158966	0.0405158	4MPTNLte	4-methylpentanal transport	Transport, extracellular
R_4MPTNLtm_neg	81	1.30123	0.0158966	0.0405158	4MPTNLtm	4-methylpentanal transport (mitochondria)	Transport, mitochondrial
R_4NPHSFte_neg	63	0.359997	0.331162	0.414457	4NPHSFte	Xenobiotic transport	Transport, extracellular
R_4NPHSULT_pos	63	0.359997	0.331162	0.414457	4NPHSULT	4-Nitrophenol Sulfotransferase	Cytochrome metabolism
R_4NPHte_pos	69	0.851883	0.151941	0.214831	4NPHte	Xenobiotic transport	Transport, extracellular
R_4OHBUTm_pos	82	1.34209	0.0124673	0.0352696	4OHBUTm	Formation of 4-Hydroxy-Butyrate	Glutamate metabolism
R_4OHBUTtce_pos	82	1.34209	0.0124673	0.0352696	4OHBUTtce	Transport of 4-Hydroxy-Butyrate, Extracellular	Transport, extracellular
R_4OHBUTtmc_pos	82	1.34209	0.0124673	0.0352696	4OHBUTtmc	Transport of 4-Hydroxy-Butyrate, Mitochondrial	Transport, mitochondrial
R_4OHMDZhr_pos	82	1.38078	0.0124673	0.0352696	4OHMDZhr	Oxidation of midazolam to 4-OH-midazolam in hepatocytes	Drug metabolism
R_4OHMDZitr_neg	83	1.42234	0.00969278	0.0304849	4OHMDZitr	4OHMDZitr	Drug metabolism
R_4OHMDZitr_pos	82	1.38078	0.0124673	0.0352696	4OHMDZitr	4OHMDZitr	Drug metabolism
R_4OHMDZtev_neg	83	1.42234	0.00969278	0.0304849	4OHMDZtev	Efflux of 4-OH-midazolam into hepatic vein	Drug metabolism
R_4OHMDZtev_pos	82	1.38078	0.0124673	0.0352696	4OHMDZtev	Efflux of 4-OH-midazolam into hepatic vein	Drug metabolism
R_4OHPROIMINOtc_pos	11	-1.57582	0.00228626	0.0165261	4OHPROIMINOtc	Transport of L-OH-Proline by the apical IMINO amino acid transporters in kidney and intestine	Transport, extracellular
R_4PYRDX_pos	82	1.33641	0.0124673	0.0352696	4PYRDX	4-Pyridoxal secretion	Transport, extracellular
R_4TMEABUTNt1_neg	73	1.14071	0.0804001	0.124359	4TMEABUTNt1	Transport of 4- (Trimethylammonio)Butanoate, Sodium Symport	Transport, extracellular
R_4TMEABUTNt1_pos	82	1.37225	0.0124673	0.0352696	4TMEABUTNt1	Transport of 4- (Trimethylammonio)Butanoate, Sodium Symport	Transport, extracellular
R_4TMEABUTNt2_neg	82	1.37225	0.0124673	0.0352696	4TMEABUTNt2	Transport of 4- (Trimethylammonio)Butanoate, Proton Symport	Transport, extracellular
R_4TMEABUTNt2_pos	73	1.14071	0.0804001	0.124359	4TMEABUTNt2	Transport of 4- (Trimethylammonio)Butanoate, Proton Symport	Transport, extracellular
R_56DHPVShc_pos	79	1.37407	0.0250536	0.0536924	56DHPVShc	Oxidation of triol metabolite to 3-keto-5,6,-dihydroxy-pravastatin in hepatocytes	Drug metabolism
R_56DHPVSitr_pos	79	1.37407	0.0250536	0.0536924	56DHPVSitr	56DHPVSitr	Drug metabolism
R_56DHPVSteb_pos	90	1.80852	0.00115504	0.0123231	56DHPVSteb	Efflux of 3-keto-5,6,-dihydroxy-pravastatin into bile	Drug metabolism
R_56DHPVStev_neg	90	1.80852	0.00115504	0.0123231	56DHPVStev	Exit of 3-keto-5,6,-dihydroxy-pravastatin into hepatic vein	Drug metabolism
R_56DHPVStev_pos	79	1.38063	0.0250536	0.0536924	56DHPVStev	Exit of 3-keto-5,6,-dihydroxy-pravastatin into hepatic vein	Drug metabolism
R_56DTHMt_neg	82	1.44941	0.0124673	0.0352696	56DTHMt	Transport of 5, 6-Dihydrothymine, Sodium Symport	Transport, extracellular
R_56DTHMt_pos	80	1.40397	0.0200405	0.0465357	56DTHMt	Transport of 5, 6-Dihydrothymine, Sodium Symport	Transport, extracellular
R_56DTHMtd_neg	80	1.40397	0.0200405	0.0465357	56DTHMtd	Transport of 5, 6-Dihydrothymine, Diffusion	Transport, extracellular
R_56DTHMtd_pos	82	1.44941	0.0124673	0.0352696	56DTHMtd	Transport of 5, 6-Dihydrothymine, Diffusion	Transport, extracellular
R_56DURAt_neg	82	1.44941	0.0124673	0.0352696	56DURAt	Transport of 5, 6-Dihydrouracil, Sodium Symport	Transport, extracellular
R_56DURAt_pos	80	1.40397	0.0200405	0.0465357	56DURAt	Transport of 5, 6-Dihydrouracil, Sodium Symport	Transport, extracellular
R_56DURAtd_neg	80	1.40397	0.0200405	0.0465357	56DURAtd	Transport of 5, 6-Dihydrouracil, Diffusion	Transport, extracellular
R_56DURAtd_pos	82	1.44941	0.0124673	0.0352696	56DURAtd	Transport of 5, 6-Dihydrouracil, Diffusion	Transport, extracellular
R_56EPPVShc_pos	80	1.37931	0.0200405	0.0465357	56EPPVShc	Oxidation of 3-alpha-iso-pravastatin to 5,6-epoxy-3-alpha-iso-pravastatin in hepatocytes	Drug metabolism
R_56EPPVSitr_pos	80	1.37931	0.0200405	0.0465357	56EPPVSitr	56EPPVSitr	Drug metabolism
R_56EPPVSteb_pos	90	1.80852	0.00115504	0.0123231	56EPPVSteb	Efflux of 5,6-epoxy-3-alpha-iso-pravastatin into bile	Drug metabolism
R_56EPPVStev_neg	90	1.80852	0.00115504	0.0123231	56EPPVStev	Exit of 5,6-epoxy-3-alpha-iso-pravastatin into hepatic vein	Drug metabolism
R_56EPPVStev_pos	80	1.38086	0.0200405	0.0465357	56EPPVStev	Exit of 5,6-epoxy-3-alpha-iso-pravastatin into hepatic vein	Drug metabolism
R_5A2OPNTNte_pos	76	1.06942	0.0464515	0.0828554	5A2OPNTNte	Transport of 5-Amino-2-Oxopentanoic Acid, Extracellular	Transport, extracellular
R_5A2OPNTNtx_pos	76	1.06942	0.0464515	0.0828554	5A2OPNTNtx	Transport of 5-Amino-2-Oxopentanoic Acid, Peroxisome	Transport, peroxisomal
R_5ADTSTSTERONEGLCte_pos	79	1.04808	0.0250536	0.0536924	5ADTSTSTERONEGLCte	Glucuronidated compound transport	Transport, extracellular
R_5ADTSTSTERONEGLCtr_neg	79	1.04808	0.0250536	0.0536924	5ADTSTSTERONEGLCtr	Glucuronidated compound transport	Transport, endoplasmic reticular
R_5ADTSTSTERONESULT_pos	65	0.753833	0.260979	0.340299	5ADTSTSTERONESULT	5alpha-Dihydrotestosterone sulfotransferase	Steroid metabolism
R_5ADTSTSTERONESte_neg	85	1.40719	0.00565611	0.0245801	5ADTSTSTERONESte	Sulfonated testosterone transport	Transport, extracellular
R_5ADTSTSTERONESte_pos	73	0.978003	0.0804001	0.124359	5ADTSTSTERONESte	Sulfonated testosterone transport	Transport, extracellular
R_5ADTSTSTERONEte_neg	70	0.879272	0.130805	0.189642	5ADTSTSTERONEte	5 alpha dihydrotesterone transport	Transport, extracellular
R_5ADTSTSTERONEte_pos	82	1.3947	0.0124673	0.0352696	5ADTSTSTERONEte	5 alpha dihydrotesterone transport	Transport, extracellular
R_5ADTSTSTERONEtr_neg	79	1.04808	0.0250536	0.0536924	5ADTSTSTERONEtr	5 alpha dihydrotesterone intracellular transport	Transport, endoplasmic reticular
R_5ADTSTSTERONEtr_pos	70	0.978121	0.130805	0.189642	5ADTSTSTERONEtr	5 alpha dihydrotesterone intracellular transport	Transport, endoplasmic reticular
R_5AOPt2_pos	81	1.51164	0.0158966	0.0405158	5AOPt2	5 Aminolevulinate transport in via proton symport	Transport, extracellular
R_5AOPt_neg	87	1.61482	0.00314361	0.0195418	5AOPt	Transport of 5-Amino-4-Oxopentanoate, Proton Symport	Transport, extracellular
R_5AOPt_pos	81	1.51164	0.0158966	0.0405158	5AOPt	Transport of 5-Amino-4-Oxopentanoate, Proton Symport	Transport, extracellular
R_5AOPtm_neg	38	-0.186839	0.411896	0.496012	5AOPtm	5 Aminolevulinate mitochondrial transport	Heme synthesis
R_5AOPtm_pos	84	1.49648	0.00744225	0.0264329	5AOPtm	5 Aminolevulinate mitochondrial transport	Heme synthesis
R_5CYSDOPAt_pos	71	0.999677	0.111943	0.166021	5CYSDOPAt	Transport of 5-S-Cysteinyldopamine	Transport, extracellular
R_5DHFtl_pos	79	1.34526	0.0250536	0.0536924	5DHFtl	5-glutamyl-DHF transport, lysosomal	Transport, lysosomal
R_5EIPENCm_pos	95	1.96556	0.000142891	0.00812649	5EIPENCm	Hydrolysis of 5, 8, 11, 14, 17-Eicosapentenoylcoa to 5, 8, 11, 14, 17-Eicosapentenoic Acid	Fatty acid oxidation
R_5EIPENCte_pos	95	1.96556	0.000142891	0.00812649	5EIPENCte	Transport of 5, 8, 11, 14, 17-Eicosapentenoic Acid, Extracellular Space	Transport, extracellular
R_5EIPENCtm_pos	95	1.96556	0.000142891	0.00812649	5EIPENCtm	Transport of 5, 8, 11, 14, 17-Eicosapentenoic Acid, Mitochondrial	Transport, mitochondrial
R_5FTHFt2_1_pos	51	-0.171631	0.940843	0.950233	5FTHFt2_1	5-Formyltetrahydrofolate Transport via Anion Exchange	Transport, extracellular
R_5G2OXPTte_pos	81	1.31155	0.0158966	0.0405158	5G2OXPTte	Transport of 5-Guanidino-2-Oxopentanoic Acid, Extracellular	Transport, extracellular
R_5G2OXPTtx_pos	81	1.31155	0.0158966	0.0405158	5G2OXPTtx	Transport of 5-Guanidino-2-Oxopentanoic Acid, Peroxisomal	Transport, peroxisomal
R_5HLTDL_pos	84	1.46664	0.00744225	0.0264329	5HLTDL	5-Hydroxy-L-tryptophan decarboxy-lyase	Tryptophan metabolism
R_5HOMEPRAZOLEte_neg	76	1.29322	0.0464515	0.0828554	5HOMEPRAZOLEte	Xenobiotic transport	Transport, extracellular
R_5HOXINDACTO2OX_pos	84	1.39869	0.00744225	0.0264329	5HOXINDACTO2OX	5-Hydroxyindoleacetaldehyde:oxygen oxidoreductase	Tryptophan metabolism
R_5HOXINDACTOX_neg	84	1.40623	0.00744225	0.0264329	5HOXINDACTOX	5-Hydroxyindoleacetaldehyde:NAD+ oxidoreductase	Tryptophan metabolism
R_5HOXINDACTOX_pos	80	1.16382	0.0200405	0.0465357	5HOXINDACTOX	5-Hydroxyindoleacetaldehyde:NAD+ oxidoreductase	Tryptophan metabolism
R_5HOXINDOAtr_neg	80	1.16382	0.0200405	0.0465357	5HOXINDOAtr	Transport of 5-Hydroxyindoleacetate	Transport, extracellular
R_5HOXINDOAtr_pos	54	-0.0610456	0.766432	0.801003	5HOXINDOAtr	Transport of 5-Hydroxyindoleacetate	Transport, extracellular
R_5HOXINOXDA_pos	83	1.50242	0.00969278	0.0304849	5HOXINOXDA	5-Hydroxytryptamine:oxygen oxidoreductase(deaminating)(flavin-containing)	Tryptophan metabolism
R_5HPETATP_pos	90	1.69497	0.00115504	0.0123231	5HPETATP	Transport of 5(S)-HPETE, Active Transport	Transport, extracellular
R_5HPETtd_neg	90	1.69462	0.00115504	0.0123231	5HPETtd	Transport of 5(S)-HPETE, Diffusion	Transport, extracellular
R_5HPETtd_pos	75	1.25161	0.056192	0.0958446	5HPETtd	Transport of 5(S)-HPETE, Diffusion	Transport, extracellular
R_5HTRPVESSEC_1_pos	75	0.988079	0.056192	0.0958446	5HTRPVESSEC_1	5-Hydroxy-L-Tryptophan Secretion via Secretory Vesicle (ATP Driven)	Transport, extracellular
R_5MTAte_neg	85	1.40662	0.00565611	0.0245801	5MTAte	Transport of 5-S-methyl-5-thioadenosine	Transport, extracellular
R_5MTAte_pos	83	1.33154	0.00969278	0.0304849	5MTAte	Transport of 5-S-methyl-5-thioadenosine	Transport, extracellular
R_5MTHFt2_1_neg	46	-0.401547	0.823756	0.850386	5MTHFt2_1	5-Methyltetrahydrofolate Transport via Anion Exchange	Transport, extracellular
R_5MTHFt2_1_pos	46	-0.401547	0.823756	0.850386	5MTHFt2_1	5-Methyltetrahydrofolate Transport via Anion Exchange	Transport, extracellular
R_5MTHFt2_neg	35	-0.789984	0.294725	0.375028	5MTHFt2	5-methyltetrahydrofolate transport via anion exchange	Transport, extracellular
R_5MTHFt2_pos	38	-0.403396	0.411896	0.496012	5MTHFt2	5-methyltetrahydrofolate transport via anion exchange	Transport, extracellular
R_5MTHFt_neg	46	-0.401547	0.823756	0.850386	5MTHFt	5-Methyltetrahydrofolate transport via receptor binding and protolysis	Transport, extracellular
R_5MTHFt_pos	46	-0.401547	0.823756	0.850386	5MTHFt	5-Methyltetrahydrofolate transport via receptor binding and protolysis	Transport, extracellular
R_5OHFVSGLUhc_pos	83	1.47303	0.00969278	0.0304849	5OHFVSGLUhc	Glucuronidation of 5-hydroxy-fluvastatin	Drug metabolism
R_5OHFVSGLUitr_neg	83	1.47303	0.00969278	0.0304849	5OHFVSGLUitr	5OHFVSGLUitr	Drug metabolism
R_5OHFVSGLUtev_pos	83	1.47303	0.00969278	0.0304849	5OHFVSGLUtev	Exit of 5-hydroxy-fluvastatin-glucuronide into hepatic vein for excretion in urine	Drug metabolism
R_5OHFVShc_pos	85	1.52506	0.00565611	0.0245801	5OHFVShc	Oxidation of fluvastatin to 5-hydroxy-fluvastatin in hepatocytes	Drug metabolism
R_5OHFVSitr_pos	85	1.52506	0.00565611	0.0245801	5OHFVSitr	5OHFVSitr	Drug metabolism
R_5OHFVSteb_pos	85	1.52506	0.00565611	0.0245801	5OHFVSteb	Efflux of 5-hydroxy-fluvastatin into bile for excretion into faeces	Drug metabolism
R_5OHHEXAc_pos	89	1.80812	0.00164325	0.0139691	5OHHEXAc	Formation of 5-Hydroxy-Hexanoate	Fatty acid oxidation
R_5OHHEXAte_pos	89	1.80812	0.00164325	0.0139691	5OHHEXAte	Transport of 5-Hydroxy-Hexanoate, Extracellular	Transport, extracellular
R_5OXPROt_neg	4	-2.19487	0.000142891	0.00812649	5OXPROt	Transport of 5-oxoprolinate	Transport, extracellular
R_5OXPROt_pos	82	1.21376	0.0124673	0.0352696	5OXPROt	Transport of 5-oxoprolinate	Transport, extracellular
R_5THFtl_pos	79	1.34526	0.0250536	0.0536924	5THFtl	5-glutamyl-THF transport, lysosomal	Transport, lysosomal
R_5THFtm_pos	84	1.4513	0.00744225	0.0264329	5THFtm	5-glutamyl-THF transport,m mitochondrial	Transport, mitochondrial
R_6AHGLZABCt_pos	90	1.69497	0.00115504	0.0123231	6AHGLZABCt	Excretion of 6-alpha-OH-gliclazide into bile	Drug metabolism
R_6AHGLZhr_pos	79	1.35299	0.0250536	0.0536924	6AHGLZhr	Oxidation of gliclazide to 6-alpha-OH-gliclazide in hepatocytes	Drug metabolism
R_6AHGLZitr_pos	79	1.35299	0.0250536	0.0536924	6AHGLZitr	6AHGLZitr	Drug metabolism
R_6AHGLZtev_neg	90	1.69497	0.00115504	0.0123231	6AHGLZtev	Excretion of 6-alpha-OH-gliclazide into hepatic vein	Drug metabolism
R_6AHGLZtev_pos	79	1.35299	0.0250536	0.0536924	6AHGLZtev	Excretion of 6-alpha-OH-gliclazide into hepatic vein	Drug metabolism
R_6BHGLZABCt_pos	90	1.69497	0.00115504	0.0123231	6BHGLZABCt	Excretion of 6-beta-OH-gliclazide into bile	Drug metabolism
R_6BHGLZGLCABCt_pos	90	1.69497	0.00115504	0.0123231	6BHGLZGLCABCt	Excretion of 6-beta-OH-gliclazide-glucuronide into bile	Drug metabolism
R_6BHGLZGLChr_pos	81	1.38486	0.0158966	0.0405158	6BHGLZGLChr	Glucuronidation of 6-beta-OH-gliclazide-glucuronide in hepatocytes	Drug metabolism
R_6BHGLZGLCitr_pos	81	1.38486	0.0158966	0.0405158	6BHGLZGLCitr	6BHGLZGLCitr	Drug metabolism
R_6BHGLZGLCtev_neg	90	1.69497	0.00115504	0.0123231	6BHGLZGLCtev	Excretion of 6-beta-OH-gliclazide-glucuronide into hepatic vein	Drug metabolism
R_6BHGLZGLCtev_pos	81	1.38486	0.0158966	0.0405158	6BHGLZGLCtev	Excretion of 6-beta-OH-gliclazide-glucuronide into hepatic vein	Drug metabolism
R_6BHGLZhr_pos	79	1.36653	0.0250536	0.0536924	6BHGLZhr	Oxidation of gliclazide to 6-beta-OH-gliclazide in hepatocytes	Drug metabolism
R_6BHGLZitr_neg	78	1.3435	0.0310312	0.0617975	6BHGLZitr	6BHGLZitr	Drug metabolism
R_6BHGLZitr_pos	79	1.36653	0.0250536	0.0536924	6BHGLZitr	6BHGLZitr	Drug metabolism
R_6BHGLZtev_neg	90	1.69497	0.00115504	0.0123231	6BHGLZtev	Excretion of 6-beta-OH-gliclazide into hepatic vein	Drug metabolism
R_6BHGLZtev_pos	79	1.36653	0.0250536	0.0536924	6BHGLZtev	Excretion of 6-beta-OH-gliclazide into hepatic vein	Drug metabolism
R_6CSMVACIDhep_pos	80	1.3932	0.0200405	0.0465357	6CSMVACIDhep	Conversion of 6-beta-carboxy simvastatin lactone to acid form	Drug metabolism
R_6CSMVACIDteb_pos	80	1.3932	0.0200405	0.0465357	6CSMVACIDteb	Efflux of 6-beta-carboxy-simvastatin-acid form into bile	Drug metabolism
R_6CSMVhep_pos	80	1.3932	0.0200405	0.0465357	6CSMVhep	Oxidation of 6-exomethylene simvastatin to 6-beta-hydroxy carboxy simvastatin lactone form	Drug metabolism
R_6CSMVitr_neg	80	1.3932	0.0200405	0.0465357	6CSMVitr	6CSMVitr	Drug metabolism
R_6DHFtl_pos	79	1.378	0.0250536	0.0536924	6DHFtl	6-glutamyl-DHF transport, lysosomal	Transport, lysosomal
R_6DHFtm_pos	66	1.03086	0.229864	0.307805	6DHFtm	6-glutamyl-DHF transport,m mitochondrial	Transport, mitochondrial
R_6EPSteb_pos	77	1.1121	0.0381281	0.0718944	6EPSteb	Efflux of 6-epipravastatin into bile	Drug metabolism
R_6EPVShc_pos	86	1.49658	0.0042391	0.0222853	6EPVShc	Isomerization of pravastatin to 6-epi-pravastatin in hepatocytes	Drug metabolism
R_6EPVStep_neg	97	1.52539	4.76304e-05	0.00769926	6EPVStep	6-epi-pravastatin exit into portal blood	Drug metabolism
R_6EPVStep_pos	99	1.64842	1.19076e-05	0.00431274	6EPVStep	6-epi-pravastatin exit into portal blood	Drug metabolism
R_6EPVSthc_neg	97	1.52539	4.76304e-05	0.00769926	6EPVSthc	Uptake of 6-epi-pravastatin by hepatocytes	Drug metabolism
R_6EPVSthc_pos	99	1.64842	1.19076e-05	0.00431274	6EPVSthc	Uptake of 6-epi-pravastatin by hepatocytes	Drug metabolism
R_6HLVSTACIDitr_pos	82	1.40933	0.0124673	0.0352696	6HLVSTACIDitr	6HLVSTACIDitr	Drug metabolism
R_6HLVSTAChep_pos	80	1.38636	0.0200405	0.0465357	6HLVSTAChep	Conversion of lactone form of 6-beta-hydroxy-lovastatin to acid form	Drug metabolism
R_6HLVSTitr_pos	82	1.38078	0.0124673	0.0352696	6HLVSTitr	6HLVSTitr	Drug metabolism
R_6HLVSTthep_neg	82	1.38078	0.0124673	0.0352696	6HLVSTthep	Uptake of 6-beta-hydroxy-lovastatin by hepatocytes	Drug metabolism
R_6HLVSTthep_pos	79	1.32885	0.0250536	0.0536924	6HLVSTthep	Uptake of 6-beta-hydroxy-lovastatin by hepatocytes	Drug metabolism
R_6HMSMVACIDhep_pos	84	1.55427	0.00744225	0.0264329	6HMSMVACIDhep	Conversion of 6-beta-hydroxy-methyl simvastatin lactone to acid form	Drug metabolism
R_6HMSMVACIDteb_pos	84	1.55427	0.00744225	0.0264329	6HMSMVACIDteb	Efflux of 6-beta-hydroxy-methyl-simvastatin-acid into bile	Drug metabolism
R_6HMSMVhep_pos	84	1.55427	0.00744225	0.0264329	6HMSMVhep	Oxidation of 6-exomethylene simvastatin to 6-beta-hydroxy methyl simvastatin	Drug metabolism
R_6HMSMVitr_neg	84	1.55427	0.00744225	0.0264329	6HMSMVitr	6HMSMVitr	Drug metabolism
R_6HOXMELATNte_pos	80	1.3285	0.0200405	0.0465357	6HOXMELATNte	6-Hydroxymelatonin Diffusion, Cytosol	Transport, extracellular
R_6HSMVACIDhep_pos	83	1.4584	0.00969278	0.0304849	6HSMVACIDhep	Conversion of 6-beta-hydroxy simvastatin lactone to acid form	Drug metabolism
R_6HSMVACIDteb_pos	83	1.4584	0.00969278	0.0304849	6HSMVACIDteb	Efflux of 6-beta-hydroxy simvastatin acid into bile	Drug metabolism
R_6HSMVhep_pos	83	1.4584	0.00969278	0.0304849	6HSMVhep	Oxidation of simvastatin to 6-beta-hydroxy simvastatin	Drug metabolism
R_6HSMVitr_pos	83	1.4584	0.00969278	0.0304849	6HSMVitr	6HSMVitr	Drug metabolism
R_6HTSTSTERONEte_pos	74	1.09068	0.0674446	0.109256	6HTSTSTERONEte	Hydroxylated testosterone transport	Transport, extracellular
R_6HTSTSTERONEtr_neg	74	1.09068	0.0674446	0.109256	6HTSTSTERONEtr	Hydroxylated testosterone transport	Transport, endoplasmic reticular
R_6MELACAChep_pos	82	1.41216	0.0124673	0.0352696	6MELACAChep	Conversion of lactone form of 6-exomethylene-lovastatin to acid form	Drug metabolism
R_6MELVACIDitr_pos	83	1.45227	0.00969278	0.0304849	6MELVACIDitr	6MELVACIDitr	Drug metabolism
R_6MELVACtbc_pos	82	1.41216	0.0124673	0.0352696	6MELVACtbc	Release of 6-exomethylene-lovastatin-acid form into bile	Drug metabolism
R_6MELVSTitr_pos	80	1.38731	0.0200405	0.0465357	6MELVSTitr	6MELVSTitr	Drug metabolism
R_6MELVSTthep_neg	80	1.38731	0.0200405	0.0465357	6MELVSTthep	Uptake of 6-exomethylene-lovastatin by hepatocytes	Drug metabolism
R_6MELVSTthep_pos	81	1.33463	0.0158966	0.0405158	6MELVSTthep	Uptake of 6-exomethylene-lovastatin by hepatocytes	Drug metabolism
R_6MSMVhep_pos	84	1.55427	0.00744225	0.0264329	6MSMVhep	Oxidation of simvastatin to 6-exomethylene lactone form	Drug metabolism
R_6OHFVSGLUhc_pos	83	1.47303	0.00969278	0.0304849	6OHFVSGLUhc	Glucuronidation of 6-hydroxy-fluvastatin	Drug metabolism
R_6OHFVSGLUitr_neg	83	1.47303	0.00969278	0.0304849	6OHFVSGLUitr	6OHFVSGLUitr	Drug metabolism
R_6OHFVSGLUtev_pos	83	1.47303	0.00969278	0.0304849	6OHFVSGLUtev	Exit of 6-hydroxy-fluvastatin-glucuronide into hepatic vein for excretion in urine	Drug metabolism
R_6OHFVShc_pos	83	1.41485	0.00969278	0.0304849	6OHFVShc	Oxidation of fluvastatin to 6-hydroxy-fluvastatin in hepatocytes	Drug metabolism
R_6OHFVSitr_neg	83	1.41485	0.00969278	0.0304849	6OHFVSitr	6OHFVSitr	Drug metabolism
R_6OHFVSteb_pos	83	1.41485	0.00969278	0.0304849	6OHFVSteb	Efflux of 6-hydroxy-fluvastatin into bile for excretion into faeces	Drug metabolism
R_6THFtl_pos	79	1.378	0.0250536	0.0536924	6THFtl	6-glutamyl-THF transport, lysosomal	Transport, lysosomal
R_6THFtm_pos	83	1.42297	0.00969278	0.0304849	6THFtm	6-glutamyl-THF transport,m mitochondrial	Transport, mitochondrial
R_7AHGLZABCt_pos	90	1.69497	0.00115504	0.0123231	7AHGLZABCt	Excretion of 7-alpha-OH-gliclazide into bile	Drug metabolism
R_7AHGLZhr_pos	79	1.35299	0.0250536	0.0536924	7AHGLZhr	Oxidation of gliclazide to 7-alpha-OH-gliclazide in hepatocytes	Drug metabolism
R_7AHGLZitr_pos	79	1.35299	0.0250536	0.0536924	7AHGLZitr	7AHGLZitr	Drug metabolism
R_7AHGLZtev_neg	90	1.69497	0.00115504	0.0123231	7AHGLZtev	Excretion of 7-alpha-OH-gliclazide into hepatic vein	Drug metabolism
R_7AHGLZtev_pos	79	1.35299	0.0250536	0.0536924	7AHGLZtev	Excretion of 7-alpha-OH-gliclazide into hepatic vein	Drug metabolism
R_7BHGLZABCt_pos	90	1.69497	0.00115504	0.0123231	7BHGLZABCt	Excretion of 7-beta-OH-gliclazide into bile	Drug metabolism
R_7BHGLZGLCABCt_pos	90	1.69497	0.00115504	0.0123231	7BHGLZGLCABCt	Excretion of 7-beta-OH-gliclazide-glucuronide into bile	Drug metabolism
R_7BHGLZGLChr_pos	81	1.38485	0.0158966	0.0405158	7BHGLZGLChr	Glucuronidation of 7-beta-OH-gliclazide-glucuronide in hepatocytes	Drug metabolism
R_7BHGLZGLCitr_pos	81	1.38485	0.0158966	0.0405158	7BHGLZGLCitr	7BHGLZGLCitr	Drug metabolism
R_7BHGLZGLCtev_neg	90	1.69497	0.00115504	0.0123231	7BHGLZGLCtev	Excretion of 7-beta-OH-gliclazide-glucuronide into hepatic vein	Drug metabolism
R_7BHGLZGLCtev_pos	81	1.38485	0.0158966	0.0405158	7BHGLZGLCtev	Excretion of 7-beta-OH-gliclazide-glucuronide into hepatic vein	Drug metabolism
R_7BHGLZhr_pos	79	1.36652	0.0250536	0.0536924	7BHGLZhr	Oxidation of gliclazide to 7-beta-OH-gliclazide in hepatocytes	Drug metabolism
R_7BHGLZitr_neg	78	1.3435	0.0310312	0.0617975	7BHGLZitr	7BHGLZitr	Drug metabolism
R_7BHGLZitr_pos	79	1.36652	0.0250536	0.0536924	7BHGLZitr	7BHGLZitr	Drug metabolism
R_7BHGLZtev_neg	90	1.69497	0.00115504	0.0123231	7BHGLZtev	Excretion of 7-beta-OH-gliclazide into hepatic vein	Drug metabolism
R_7BHGLZtev_pos	79	1.36652	0.0250536	0.0536924	7BHGLZtev	Excretion of 7-beta-OH-gliclazide into hepatic vein	Drug metabolism
R_7DHCDCHOLabc_pos	86	1.60628	0.0042391	0.0222853	7DHCDCHOLabc	7-Dehydrochenodeoxycholic acid ABC bile acid transporter	Transport, extracellular
R_7DHCDCHOLt2_pos	61	0.0887791	0.411896	0.496012	7DHCDCHOLt2	7-Dehydrochenodeoxycholic acid transport via sodium cotransport	Transport, extracellular
R_7DHCDCHOLt_neg	61	0.0887791	0.411896	0.496012	7DHCDCHOLt	7-Dehydrochenodeoxycholic acid transport via bicarbonate countertransport	Transport, extracellular
R_7DHCDCHOLt_pos	85	1.60411	0.00565611	0.0245801	7DHCDCHOLt	7-Dehydrochenodeoxycholic acid transport via bicarbonate countertransport	Transport, extracellular
R_7DHCHOLabc_pos	86	1.60628	0.0042391	0.0222853	7DHCHOLabc	7-Dehydrocholic acid ABC bile acid transporter	Transport, extracellular
R_7DHCHOLt2_pos	61	0.0887791	0.411896	0.496012	7DHCHOLt2	7-Dehydrocholic acid transport via sodium cotransport	Transport, extracellular
R_7DHCHOLt_neg	61	0.0887791	0.411896	0.496012	7DHCHOLt	7-Dehydrocholic acid transport via bicarbonate countertransport	Transport, extracellular
R_7DHCHOLt_pos	85	1.60411	0.00565611	0.0245801	7DHCHOLt	7-Dehydrocholic acid transport via bicarbonate countertransport	Transport, extracellular
R_7DHCHSTEROLt_pos	90	1.69497	0.00115504	0.0123231	7DHCHSTEROLt	Transport of Cholesta-5, 7-Dien-3Beta-Ol, Active Transport	Transport, extracellular
R_7DHCHSTEROLtd_neg	90	1.69548	0.00115504	0.0123231	7DHCHSTEROLtd	Transport of Cholesta-5, 7-Dien-3Beta-Ol, Diffusion	Transport, extracellular
R_7DHCHSTEROLtd_pos	76	0.896783	0.0464515	0.0828554	7DHCHSTEROLtd	Transport of Cholesta-5, 7-Dien-3Beta-Ol, Diffusion	Transport, extracellular
R_7DHCHSTEROLtr_neg	79	1.08387	0.0250536	0.0536924	7DHCHSTEROLtr	Cholesterol precursor intracellular transport	Transport, endoplasmic reticular
R_7DHCHSTEROLtr_pos	78	1.04405	0.0310312	0.0617975	7DHCHSTEROLtr	Cholesterol precursor intracellular transport	Transport, endoplasmic reticular
R_7DHFtl_pos	80	1.41084	0.0200405	0.0465357	7DHFtl	7-glutamyl-DHF transport, lysosomal	Transport, lysosomal
R_7DHFtm_pos	68	0.992127	0.175411	0.24229	7DHFtm	7-glutamyl-DHF transport,m mitochondrial	Transport, mitochondrial
R_7HPVShc_pos	80	1.37931	0.0200405	0.0465357	7HPVShc	Oxidation of 3-alpha-iso-pravastatin to 7-hydroxy-3-alpha-iso-pravastatin in hepatocytes	Drug metabolism
R_7HPVSitr_pos	80	1.37931	0.0200405	0.0465357	7HPVSitr	7HPVSitr	Drug metabolism
R_7HPVSteb_pos	90	1.80852	0.00115504	0.0123231	7HPVSteb	Efflux of 7-hydroxy-3-alpha-iso-pravastatin into bile	Drug metabolism
R_7HPVStev_neg	90	1.80852	0.00115504	0.0123231	7HPVStev	Exit of 7-hydroxy-3-alpha-iso-pravastatin into hepatic vein	Drug metabolism
R_7HPVStev_pos	80	1.38086	0.0200405	0.0465357	7HPVStev	Exit of 7-hydroxy-3-alpha-iso-pravastatin into hepatic vein	Drug metabolism
R_7KILTCHOLATP_pos	84	1.32565	0.00744225	0.0264329	7KILTCHOLATP	Transport of 7-Ketolithocholate, Active Transport	Transport, extracellular
R_7KILTCHOLt_neg	84	1.32193	0.00744225	0.0264329	7KILTCHOLt	Transport of 7-Ketolithocholate, Sodium Symport	Transport, extracellular
R_7KILTCHOLt_pos	79	1.35122	0.0250536	0.0536924	7KILTCHOLt	Transport of 7-Ketolithocholate, Sodium Symport	Transport, extracellular
R_7KLITCHOLc_pos	79	1.35866	0.0250536	0.0536924	7KLITCHOLc	Formation of 7-Ketolithocholate	Bile acid synthesis
R_7OHOCTAc_pos	76	1.28356	0.0464515	0.0828554	7OHOCTAc	Formation of 7-Hydroxy-Octanoate	Fatty acid oxidation
R_7OHOCTAte_pos	76	1.28356	0.0464515	0.0828554	7OHOCTAte	Transport of 7-Hydroxy-Octanoate, Extracellular	Transport, extracellular
R_7THFtl_pos	80	1.41084	0.0200405	0.0465357	7THFtl	7-glutamyl-THF transport, lysosomal	Transport, lysosomal
R_7THFtm_pos	78	1.15677	0.0310312	0.0617975	7THFtm	7-glutamyl-THF transport,m mitochondrial	Transport, mitochondrial
R_A4GALTc_pos	69	0.936823	0.151941	0.214831	A4GALTc	Lactosylceramide 4-alpha-galactosyltransferase	Sphingolipid metabolism
R_A4GALTg_pos	85	1.58244	0.00565611	0.0245801	A4GALTg	Lactosylceramide 4-alpha-galactosyltransferase	Sphingolipid metabolism
R_A4GNT1g_pos	81	1.38159	0.0158966	0.0405158	A4GNT1g	Alpha 1,4-N-acetylglucosaminyltransferase, Golgi apparatus	O-glycan metabolism
R_A4GNT2g_pos	82	1.4274	0.0124673	0.0352696	A4GNT2g	Alpha 1,4-N-acetylglucosaminyltransferase, Golgi apparatus	O-glycan metabolism
R_AACOAT_pos	83	1.3509	0.00969278	0.0304849	AACOAT	Acetoacetyl-CoA:acetate CoA-transferase	Propanoate metabolism
R_AACTOOR_pos	73	1.04338	0.0804001	0.124359	AACTOOR	Aminoacetone:oxygen oxidoreductase(deaminating)(flavin-containing)	Glycine, serine, alanine, and threonine metabolism
R_AACTte_neg	52	0.231461	0.881984	0.896311	AACTte	Assumed Passive Diffusion into Extracellular Space	Transport, extracellular
R_AACTte_pos	78	1.14547	0.0310312	0.0617975	AACTte	Assumed Passive Diffusion into Extracellular Space	Transport, extracellular
R_AACTtm_pos	52	0.231461	0.881984	0.896311	AACTtm	Aminoacetone transport (mitochondrial)	Transport, mitochondrial
R_AADSACYCL_pos	80	1.32317	0.0200405	0.0465357	AADSACYCL	AAPSAS	Lysine metabolism
R_AASAD3_pos	56	0.339048	0.655632	0.702434	AASAD3	L-aminoadipate-semialdehyde dehydrogenase (NADH)	Lysine metabolism
R_AASAD3m_pos	59	0.521136	0.502727	0.581969	AASAD3m	L-aminoadipate-semialdehyde dehydrogenase (NADH), mitochondrial	Lysine metabolism
R_AATA_neg	82	1.29462	0.0124673	0.0352696	AATA	2 aminoadipate transaminase	Lysine metabolism
R_AATA_pos	24	-0.664739	0.056192	0.0958446	AATA	2 aminoadipate transaminase	Lysine metabolism
R_ABO1g_pos	75	1.02387	0.056192	0.0958446	ABO1g	ABO blood group (transferase A, alpha 1-3-N-acetylgalactosaminyltransferase; transferase B, alpha 1-3-galactosyltransferase)	Blood group synthesis
R_ABO2g_pos	73	0.984671	0.0804001	0.124359	ABO2g	ABO blood group (transferase A, alpha 1-3-N-acetylgalactosaminyltransferase; transferase B, alpha 1-3-galactosyltransferase)	Blood group synthesis
R_ABO3g_pos	74	0.96696	0.0674446	0.109256	ABO3g	ABO blood group (transferase A, alpha 1-3-N-acetylgalactosaminyltransferase; transferase B, alpha 1-3-galactosyltransferase)	Blood group synthesis
R_ABO4g_pos	73	0.929177	0.0804001	0.124359	ABO4g	ABO blood group (transferase A, alpha 1-3-N-acetylgalactosaminyltransferase; transferase B, alpha 1-3-galactosyltransferase)	Blood group synthesis
R_ABO5g_pos	73	0.929177	0.0804001	0.124359	ABO5g	ABO blood group (transferase A, alpha 1-3-N-acetylgalactosaminyltransferase; transferase B, alpha 1-3-galactosyltransferase)	Blood group synthesis
R_ABO6g_pos	75	1.00344	0.056192	0.0958446	ABO6g	ABO blood group (transferase A, alpha 1-3-N-acetylgalactosaminyltransferase; transferase B, alpha 1-3-galactosyltransferase)	Blood group synthesis
R_ABO7g_pos	75	1.00344	0.056192	0.0958446	ABO7g	ABO blood group (transferase A, alpha 1-3-N-acetylgalactosaminyltransferase; transferase B, alpha 1-3-galactosyltransferase)	Blood group synthesis
R_ABO8g_pos	76	1.03964	0.0464515	0.0828554	ABO8g	ABO blood group (transferase A, alpha 1-3-N-acetylgalactosaminyltransferase; transferase B, alpha 1-3-galactosyltransferase)	Blood group synthesis
R_ABO9g_pos	74	1.08287	0.0674446	0.109256	ABO9g	ABO blood group (transferase A, alpha 1-3-N-acetylgalactosaminyltransferase; transferase B, alpha 1-3-galactosyltransferase)	Blood group synthesis
R_ABTArm_neg	68	0.817401	0.175411	0.24229	ABTArm	4-aminobutyrate transaminase, reversible (mitochondrial)	Glutamate metabolism
R_ABTArm_pos	80	1.27616	0.0200405	0.0465357	ABTArm	4-aminobutyrate transaminase, reversible (mitochondrial)	Glutamate metabolism
R_ABTD1_neg	73	1.10373	0.0804001	0.124359	ABTD1	L-Arabinitol 4-Dehydrogenase	Pentose phosphate pathway
R_ABTD_neg	73	1.15158	0.0804001	0.124359	ABTD	L-arabinitol 4-dehydrogenase	Pentose phosphate pathway
R_ABTD_pos	77	1.28998	0.0381281	0.0718944	ABTD	L-arabinitol 4-dehydrogenase	Pentose phosphate pathway
R_ABT_Dt_neg	81	1.51164	0.0158966	0.0405158	ABT_Dt	D-Arabitol Transport via Diffusion	Transport, extracellular
R_ABT_Dt_pos	81	1.51164	0.0158966	0.0405158	ABT_Dt	D-Arabitol Transport via Diffusion	Transport, extracellular
R_ABTpp2_neg	81	1.51164	0.0158966	0.0405158	ABTpp2	D-arabinitol transport in via proton symporter	Transport, extracellular
R_ABTpp2_pos	81	1.51164	0.0158966	0.0405158	ABTpp2	D-arabinitol transport in via proton symporter	Transport, extracellular
R_ABTt_neg	73	1.15291	0.0804001	0.124359	ABTt	L arabinitol transport via passive diffusion	Transport, extracellular
R_ABUTD_pos	84	1.4062	0.00744225	0.0264329	ABUTD	Aminobutyraldehyde dehydrogenase	Beta-Alanine metabolism
R_ABUTt2rL_neg	85	1.58429	0.00565611	0.0245801	ABUTt2rL	4-aminobutyrate reversible transport in via proton symport (lysosome)	Transport, lysosomal
R_ABUTt2rL_pos	47	-0.118434	0.881984	0.896311	ABUTt2rL	4-aminobutyrate reversible transport in via proton symport (lysosome)	Transport, lysosomal
R_ABUTt2r_neg	31	-0.980577	0.175411	0.24229	ABUTt2r	4 aminobutyrate reversible transport in via proton symport	Transport, extracellular
R_ABUTt2r_pos	34	-0.888603	0.260979	0.340299	ABUTt2r	4 aminobutyrate reversible transport in via proton symport	Transport, extracellular
R_ABUTt4_2_r_neg	37	-0.66498	0.370219	0.45494	ABUTt4_2_r	ABUTt4 LPAREN 2 RPAREN r	Transport, extracellular
R_ABUTt4_2_r_pos	31	-0.980577	0.175411	0.24229	ABUTt4_2_r	ABUTt4 LPAREN 2 RPAREN r	Transport, extracellular
R_ACACT10m_neg	61	0.543468	0.411896	0.496012	ACACT10m	Acetyl-CoA C-acyltransferase	Valine, leucine, and isoleucine metabolism
R_ACACT10m_pos	69	0.774665	0.151941	0.214831	ACACT10m	Acetyl-CoA C-acyltransferase	Valine, leucine, and isoleucine metabolism
R_ACACT1m_pos	74	0.817491	0.0674446	0.109256	ACACT1m	Acetyl CoA C acetyltransferase mitochondrial	Tryptophan metabolism
R_ACACT1r_neg	72	0.7865	0.0951774	0.143538	ACACT1r	Acetyl-CoA C-acetyltransferase	Tryptophan metabolism
R_ACACT1r_pos	86	1.53392	0.0042391	0.0222853	ACACT1r	Acetyl-CoA C-acetyltransferase	Tryptophan metabolism
R_ACACT1x_pos	94	2.02725	0.000226244	0.00830347	ACACT1x	Acetyl-CoA:acetyl-CoA C-acetyltransferase	Cholesterol metabolism
R_ACACT4m_neg	80	1.16632	0.0200405	0.0465357	ACACT4m	Acetyl-CoA C-acyltransferase (C10:0)	Fatty acid oxidation
R_ACACT4m_pos	68	0.632208	0.175411	0.24229	ACACT4m	Acetyl-CoA C-acyltransferase (C10:0)	Fatty acid oxidation
R_ACACT4p_pos	96	2.12748	8.33532e-05	0.00769926	ACACT4p	Acetyl CoA C acetyltransferase octanoyl CoA peroxisomal	Fatty acid oxidation
R_ACACT5m_neg	80	1.15897	0.0200405	0.0465357	ACACT5m	Acetyl-CoA C-acyltransferase (C12:0)	Fatty acid oxidation
R_ACACT5m_pos	24	-0.690234	0.056192	0.0958446	ACACT5m	Acetyl-CoA C-acyltransferase (C12:0)	Fatty acid oxidation
R_ACACT5p_pos	93	1.87491	0.000357228	0.0097357	ACACT5p	Acetyl CoA C acyltransferase decanoyl CoA peroxisomal	Fatty acid oxidation
R_ACACT6m_neg	63	0.360135	0.331162	0.414457	ACACT6m	Acetyl-CoA C-acyltransferase (C14:0)	Fatty acid oxidation
R_ACACT6p_pos	93	1.87491	0.000357228	0.0097357	ACACT6p	Acetyl CoA C acetyltransferase dodecanoyl peroxisomal	Fatty acid oxidation
R_ACACT7m_neg	59	0.253765	0.502727	0.581969	ACACT7m	Acetyl-CoA C-acyltransferase (C16:0)	Fatty acid oxidation
R_ACACT7p_pos	94	1.90451	0.000226244	0.00830347	ACACT7p	Acetyl CoA acyltransferase tetradecanoyl CoA peroxisomal	Fatty acid oxidation
R_ACACT8p_pos	88	1.82964	0.00228626	0.0165261	ACACT8p	Acetyl CoA acyltransferase hexadecanoyl CoA peroxisomal	Fatty acid oxidation
R_ACACT9p_pos	83	1.34256	0.00969278	0.0304849	ACACT9p	Acetyl CoA acyltransferase tetracosanoyl CoA peroxisomal	Fatty acid oxidation
R_ACACt2_neg	76	1.1515	0.0464515	0.0828554	ACACt2	Acetoacetate transport via proton symport	Transport, extracellular
R_ACACt2_pos	76	1.1515	0.0464515	0.0828554	ACACt2	Acetoacetate transport via proton symport	Transport, extracellular
R_ACACt2m_neg	81	1.24304	0.0158966	0.0405158	ACACt2m	Acetoacetate mitochondrial transport via H+ symport	Transport, mitochondrial
R_ACACt2m_pos	78	1.3382	0.0310312	0.0617975	ACACt2m	Acetoacetate mitochondrial transport via H+ symport	Transport, mitochondrial
R_ACACtx_neg	81	1.34234	0.0158966	0.0405158	ACACtx	Acetoacetate transport via diffusion, glyoxysome	Transport, peroxisomal
R_ACALDt_neg	51	0.182232	0.940843	0.950233	ACALDt	Acetaldehyde reversible transport	Transport, extracellular
R_ACALDt_pos	81	1.45224	0.0158966	0.0405158	ACALDt	Acetaldehyde reversible transport	Transport, extracellular
R_ACALDtm_neg	75	0.880292	0.056192	0.0958446	ACALDtm	Acetaldehyde mitochondrial diffusion	Transport, mitochondrial
R_ACALDtr_pos	70	0.945623	0.130805	0.189642	ACALDtr	Acetaldehyde reversible transport (ER)	Transport, endoplasmic reticular
R_ACALDtx_pos	78	1.35821	0.0310312	0.0617975	ACALDtx	Acetaldehyde transport via diffusion, glyoxysome	Transport, peroxisomal
R_ACCOAC_pos	57	0.323025	0.602679	0.673269	ACCOAC	Acetyl-CoA carboxylase	Fatty acid oxidation
R_ACCOACrm_pos	27	-0.903777	0.0951774	0.143538	ACCOACrm	Acetyl Coa carboxylase mitochondrial	Fatty acid oxidation
R_ACCOAL_pos	81	1.15827	0.0158966	0.0405158	ACCOAL	Acetate-CoA ligase (ADP-forming)	Propanoate metabolism
R_ACCOALm_pos	71	0.865625	0.111943	0.166021	ACCOALm	Acetate-CoA ligase (AMP-forming)	Propanoate metabolism
R_ACCOAgt_pos	87	1.6286	0.00314361	0.0195418	ACCOAgt	Acetyl-coa transport	Transport, extracellular
R_ACCOAtr_neg	78	1.10515	0.0310312	0.0617975	ACCOAtr	Acetyl-coa transport	Transport, endoplasmic reticular
R_ACCOAtr_pos	78	1.10515	0.0310312	0.0617975	ACCOAtr	Acetyl-coa transport	Transport, endoplasmic reticular
R_ACChex_neg	68	1.01145	0.175411	0.24229	ACChex	Palmitoyl Coenzyme A Hydrolase	Fatty acid oxidation
R_ACDO_pos	85	1.4112	0.00565611	0.0245801	ACDO	Acireductone dioxygenase	Methionine and cysteine metabolism
R_ACER11r_pos	87	1.66783	0.00314361	0.0195418	ACER11r	Alkaline Ceramidase 1 (Acer1) Or Alkaline Ceramidase 3 (Acer3)	Sphingolipid metabolism
R_ACER12r_pos	84	1.46497	0.00744225	0.0264329	ACER12r	Alkaline Ceramidase 1 (Acer1) Or Alkaline Ceramidase 3 (Acer3)	Exchange/demand reaction
R_ACER21g_pos	83	1.57692	0.00969278	0.0304849	ACER21g	Alkaline Ceramidase 2 (Acer2) Or Alkaline Ceramidase 3 (Acer3)	Exchange/demand reaction
R_ACER22g_pos	83	1.39937	0.00969278	0.0304849	ACER22g	Alkaline Ceramidase 2 (Acer2) Or Alkaline Ceramidase 3 (Acer3)	Sphingolipid metabolism
R_ACER23g_pos	72	0.797638	0.0951774	0.143538	ACER23g	Alkaline Ceramidase 3 (Acer3) Or Alkaline Ceramidase 2 (Acer2)	Sphingolipid metabolism
R_ACER31r_pos	72	0.82483	0.0951774	0.143538	ACER31r	Alkaline Ceramidase 3 (Acer3)	Sphingolipid metabolism
R_ACETONEt2_neg	82	1.21877	0.0124673	0.0352696	ACETONEt2	Acetone transport via proton symport	Transport, extracellular
R_ACETONEt2_pos	73	1.09727	0.0804001	0.124359	ACETONEt2	Acetone transport via proton symport	Transport, extracellular
R_ACETONEt2m_neg	82	1.21877	0.0124673	0.0352696	ACETONEt2m	Acetone mitochondrial transport via proton symport	Transport, mitochondrial
R_ACETONEt2m_pos	73	1.09727	0.0804001	0.124359	ACETONEt2m	Acetone mitochondrial transport via proton symport	Transport, mitochondrial
R_ACGAGBSIDEtg_neg	87	1.60922	0.00314361	0.0195418	ACGAGBSIDEtg	Acgagbside hs intracellular transport	Transport, golgi apparatus
R_ACGAGBSIDEtl_pos	87	1.60922	0.00314361	0.0195418	ACGAGBSIDEtl	Acgagbside hs intracellular transport	Transport, lysosomal
R_ACGALFUCGALACGALFUC12GAL14ACGLCGALGLUSIDEte_neg	73	0.929177	0.0804001	0.124359	ACGALFUCGALACGALFUC12GAL14ACGLCGALGLUSIDEte	Blood group intracellular transport	Transport, extracellular
R_ACGALFUCGALACGALFUC12GAL14ACGLCGALGLUSIDEtg_pos	73	0.929177	0.0804001	0.124359	ACGALFUCGALACGALFUC12GAL14ACGLCGALGLUSIDEtg	Blood group intracellular transport	Transport, golgi apparatus
R_ACGALFUCGALACGALFUCGALACGLCGAL14ACGLCGALGLUSIDEte_neg	75	1.00344	0.056192	0.0958446	ACGALFUCGALACGALFUCGALACGLCGAL14ACGLCGALGLUSIDEte	Blood group intracellular transport	Transport, extracellular
R_ACGALFUCGALACGALFUCGALACGLCGAL14ACGLCGALGLUSIDEtg_pos	75	1.00344	0.056192	0.0958446	ACGALFUCGALACGALFUCGALACGLCGAL14ACGLCGALGLUSIDEtg	Blood group intracellular transport	Transport, golgi apparatus
R_ACGALK2_pos	75	1.24427	0.056192	0.0958446	ACGALK2	N-acetylgalactosamine kinase (ITP)	Aminosugar metabolism
R_ACGALK_pos	77	1.26412	0.0381281	0.0718944	ACGALK	N-acetylgalactosamine kinase	Aminosugar metabolism
R_ACGALtlg_neg	85	1.58244	0.00565611	0.0245801	ACGALtlg	N-acetyl-galactosamine intracellular transport	Transport, golgi apparatus
R_ACGALtly_pos	83	1.37322	0.00969278	0.0304849	ACGALtly	N-acetyl-galactosamine lysosomal efflux	Transport, lysosomal
R_ACGALtr_pos	75	0.927558	0.056192	0.0958446	ACGALtr	N-Acetylgalactosamine Export	Transport, extracellular
R_ACGAM2E_neg	33	-0.665369	0.229864	0.307805	ACGAM2E	N-acetylglucosamine 2-epimerase	Aminosugar metabolism
R_ACGAM2E_pos	77	1.08306	0.0381281	0.0718944	ACGAM2E	N-acetylglucosamine 2-epimerase	Aminosugar metabolism
R_ACGAM6PS_pos	85	1.19769	0.00565611	0.0245801	ACGAM6PS	N acetylglucosamine 6 phosphate synthase	Aminosugar metabolism
R_ACGAMK_pos	33	-0.649609	0.229864	0.307805	ACGAMK	N-acetylglucosamine kinase	Aminosugar metabolism
R_ACGAMPM_pos	33	-0.667217	0.229864	0.307805	ACGAMPM	Phosphoacetylglucosamine mutase	Aminosugar metabolism
R_ACGBGBSIDEtg_neg	85	1.58244	0.00565611	0.0245801	ACGBGBSIDEtg	Acgbgbside hs intracellular transport	Transport, golgi apparatus
R_ACGBGBSIDEtl_pos	85	1.58244	0.00565611	0.0245801	ACGBGBSIDEtl	Acgbgbside hs intracellular transport	Transport, lysosomal
R_ACGLUtd_pos	84	1.39445	0.00744225	0.0264329	ACGLUtd	Transport of N-Acetyl-L-Glutamate, Diffusion	Transport, extracellular
R_ACGLUtm_neg	84	1.39445	0.00744225	0.0264329	ACGLUtm	Transport of N-Acetyl-L-Glutamate, Mitochondrial	Transport, mitochondrial
R_ACGLYtc_pos	60	0.611745	0.456097	0.540863	ACGLYtc	Intra-Cellular Transport of Acetyl-Glycine	Transport, mitochondrial
R_ACGLYte_pos	60	0.611745	0.456097	0.540863	ACGLYte	Extracellular Transport of Acetyl-Glycine	Transport, extracellular
R_ACGPID_pos	84	1.2925	0.00744225	0.0264329	ACGPID	N-acetylglucosaminylphosphatidylinositol deacetylase	Phosphatidylinositol phosphate metabolism
R_ACGSm_pos	84	1.39445	0.00744225	0.0264329	ACGSm	N acteylglutamate synthase mitochondrial	Urea cycle
R_ACHEe_pos	56	0.208915	0.655632	0.702434	ACHEe	Acetylcholinesterase	Glycerophospholipid metabolism
R_ACHOMm_pos	79	1.34244	0.0250536	0.0536924	ACHOMm	Acetylation of Homoserine	Glycine, serine, alanine, and threonine metabolism
R_ACHOMte_pos	79	1.34244	0.0250536	0.0536924	ACHOMte	Transport of Acetyl Homoserine, Extracellular	Transport, extracellular
R_ACHOMtm_pos	79	1.34244	0.0250536	0.0536924	ACHOMtm	Transport of Acetyl Homoserine, Intracellular	Transport, mitochondrial
R_ACHVESSEC_1_pos	90	1.69184	0.00115504	0.0123231	ACHVESSEC_1	Acetylcholine Secretion via Secretory Vesicle (ATP Driven)	Transport, extracellular
R_ACILEm_pos	81	1.25809	0.0158966	0.0405158	ACILEm	Acetylation of Isoleucine	Valine, leucine, and isoleucine metabolism
R_ACILEte_pos	81	1.25809	0.0158966	0.0405158	ACILEte	Transport of Acetyl Isoleucine, Extracellular	Transport, extracellular
R_ACILEtm_pos	81	1.25809	0.0158966	0.0405158	ACILEtm	Transport of Acetyl Isoleucine, Intracellular	Transport, mitochondrial
R_ACITL_pos	80	1.0637	0.0200405	0.0465357	ACITL	ATP-Citrate lyase	Citric acid cycle
R_ACLEUm_pos	77	1.23626	0.0381281	0.0718944	ACLEUm	Acetylation of Leucine	Valine, leucine, and isoleucine metabolism
R_ACLEUte_pos	77	1.23626	0.0381281	0.0718944	ACLEUte	Transport of Acetyl Leucine, Extracellular	Transport, extracellular
R_ACLEUtm_pos	77	1.23626	0.0381281	0.0718944	ACLEUtm	Transport of Acetyl Leucine, Intracellular	Transport, mitochondrial
R_ACLYSHYc_neg	75	0.965806	0.056192	0.0958446	ACLYSHYc	Hydrolysis of Acetyl-Lysine	Lysine metabolism
R_ACLYSHYc_pos	91	1.87252	0.000797809	0.0123231	ACLYSHYc	Hydrolysis of Acetyl-Lysine	Lysine metabolism
R_ACLYSt_neg	83	1.35773	0.00969278	0.0304849	ACLYSt	Transport of Acetyl-Lysine, Extracellular	Transport, extracellular
R_ACLYSt_pos	75	0.965806	0.056192	0.0958446	ACLYSt	Transport of Acetyl-Lysine, Extracellular	Transport, extracellular
R_ACLYStm_pos	91	1.87024	0.000797809	0.0123231	ACLYStm	Intracellular Transport of Acetyl-Lysine	Transport, extracellular
R_ACMPGLUChr_pos	77	1.0982	0.0381281	0.0718944	ACMPGLUChr	Glucuronidation of acetaminophen in hepatocytes	Drug metabolism
R_ACMPGLUTTRsc_pos	78	1.31498	0.0310312	0.0617975	ACMPGLUTTRsc	ACMPGLUTTRsc	Drug metabolism
R_ACMPGLUTdt_neg	26	-1.02843	0.0804001	0.124359	ACMPGLUTdt	Uptake of acetaminophen-glutathione-conjugate into the enterocytes	Drug metabolism
R_ACMPGLUTdt_pos	26	-1.02691	0.0804001	0.124359	ACMPGLUTdt	Uptake of acetaminophen-glutathione-conjugate into the enterocytes	Drug metabolism
R_ACMPGLUTitr_pos	78	1.31498	0.0310312	0.0617975	ACMPGLUTitr	ACMPGLUTitr	Drug metabolism
R_ACMPGLUTtep_pos	26	-1.02843	0.0804001	0.124359	ACMPGLUTtep	Efflux of acetaminophen-glutathione-conjugate from enterocytes into portal blood	Drug metabolism
R_ACMPGLUTthc_pos	26	-1.02843	0.0804001	0.124359	ACMPGLUTthc	Uptake of acetaminophen-glutathione-conjugate by the hepatocytes	Drug metabolism
R_ACMPGLUitr_pos	77	1.0982	0.0381281	0.0718944	ACMPGLUitr	ACMPGLUitr	Drug metabolism
R_ACMPGLUtep_pos	12	-1.5866	0.00314361	0.0195418	ACMPGLUtep	Efflux of acetaminophen-glucuronide-conjugate from enterocytes into portal blood	Drug metabolism
R_ACMPGLUthc_pos	12	-1.5866	0.00314361	0.0195418	ACMPGLUthc	Uptake of acetaminophen-glucuronide-conjugate by the hepatocytes	Drug metabolism
R_ACMPShc_pos	50	0.144782	1	1	ACMPShc	Sulphation of acetaminophen in hepatocytes	Drug metabolism
R_ACMPdt_neg	26	-1.02843	0.0804001	0.124359	ACMPdt	Uptake of acetaminophen by enterocytes	Drug metabolism
R_ACMPdt_pos	90	1.69497	0.00115504	0.0123231	ACMPdt	Uptake of acetaminophen by enterocytes	Drug metabolism
R_ACMPitr_pos	81	1.35749	0.0158966	0.0405158	ACMPitr	ACMPitr	Drug metabolism
R_ACMPthc_pos	26	-1.02843	0.0804001	0.124359	ACMPthc	Uptake of acetaminophen by the hepatocytes	Drug metabolism
R_ACMPtu_pos	90	1.69497	0.00115504	0.0123231	ACMPtu	Efflux of acetaminophen by P-gp from the enterocytes into lumen	Drug metabolism
R_ACN13ACNGALGBSIDEte_pos	74	1.11688	0.0674446	0.109256	ACN13ACNGALGBSIDEte	ACN13ACNGALGBSIDEte	Transport, extracellular
R_ACN13ACNGALGBSIDEtg_neg	74	1.11688	0.0674446	0.109256	ACN13ACNGALGBSIDEtg	Acn13acngalgbside hs intracellular transport	Transport, golgi apparatus
R_ACN23ACNGALGBSIDEte_pos	74	1.11688	0.0674446	0.109256	ACN23ACNGALGBSIDEte	ACN23ACNGALGBSIDEte	Transport, extracellular
R_ACN23ACNGALGBSIDEtg_neg	74	1.11688	0.0674446	0.109256	ACN23ACNGALGBSIDEtg	Acn23acngalgbside intracellular transport	Transport, golgi apparatus
R_ACNACNGAL14ACGLCGALGLUSIDEte_neg	80	1.27472	0.0200405	0.0465357	ACNACNGAL14ACGLCGALGLUSIDEte	Blood group intracellular transport	Transport, extracellular
R_ACNACNGAL14ACGLCGALGLUSIDEtg_pos	81	1.38028	0.0158966	0.0405158	ACNACNGAL14ACGLCGALGLUSIDEtg	Blood group intracellular transport	Transport, golgi apparatus
R_ACNACNGALGBSIDEte_pos	79	1.32904	0.0250536	0.0536924	ACNACNGALGBSIDEte	ACNACNGALGBSIDEte	Transport, extracellular
R_ACNACNGALGBSIDEtg_neg	79	1.32904	0.0250536	0.0536924	ACNACNGALGBSIDEtg	Acnacngalgbside hs intracellular transport	Transport, golgi apparatus
R_ACNAM9PL2_pos	75	1.26888	0.056192	0.0958446	ACNAM9PL2	N-Acetylneuraminate 9-phosphate pyruvate-lyase (pyruvate-phosphorylating)	Aminosugar metabolism
R_ACNAM9PL_pos	74	0.876949	0.0674446	0.109256	ACNAM9PL	N-Acetylneuraminate 9-phosphate pyruvate-lyase (pyruvate-phosphorylating)	Aminosugar metabolism
R_ACNAMPH_pos	74	0.876949	0.0674446	0.109256	ACNAMPH	N-Acetylneuraminate 9-phosphate phosphohydrolase	Aminosugar metabolism
R_ACNAMlt_neg	84	1.52094	0.00744225	0.0264329	ACNAMlt	N-acetylneuraminate transport into lysososme	Transport, lysosomal
R_ACNAMt2_pos	81	1.51164	0.0158966	0.0405158	ACNAMt2	N-acetylneuraminate proton symport	Transport, extracellular
R_ACNAMtn_pos	83	1.41399	0.00969278	0.0304849	ACNAMtn	N-acetylneuraminate nuclear import	Transport, nuclear
R_ACNAMtr_pos	81	1.51164	0.0158966	0.0405158	ACNAMtr	N-Acetylneuraminate Export	Transport, extracellular
R_ACNGALACGLCGAL14ACGLCGALGLUSIDEte_neg	75	1.20288	0.056192	0.0958446	ACNGALACGLCGAL14ACGLCGALGLUSIDEte	Blood group intracellular transport	Transport, extracellular
R_ACNGALACGLCGAL14ACGLCGALGLUSIDEtg_pos	80	1.32312	0.0200405	0.0465357	ACNGALACGLCGAL14ACGLCGALGLUSIDEtg	Blood group intracellular transport	Transport, golgi apparatus
R_ACNMCT_pos	71	1.16672	0.111943	0.166021	ACNMCT	CTP:N-acylneuraminate cytidylyltransferase	Aminosugar metabolism
R_ACNML_neg	85	1.45075	0.00565611	0.0245801	ACNML	N-Acetylneuraminate lyase	Aminosugar metabolism
R_ACNML_pos	75	0.943365	0.056192	0.0958446	ACNML	N-Acetylneuraminate lyase	Aminosugar metabolism
R_ACOAD10m_pos	70	0.878683	0.130805	0.189642	ACOAD10m	2-methylacyl-coa dehydrogenase, trans-2-Methylbut-2-enoyl-CoA forming	Valine, leucine, and isoleucine metabolism
R_ACOAD1fm_pos	69	0.728811	0.151941	0.214831	ACOAD1fm	Acyl-CoA dehydrogenase (butanoyl-CoA), mitochondrial	Butanoate metabolism
R_ACOAD8m_pos	54	0.00334199	0.766432	0.801003	ACOAD8m	Isovaleryl-coa dehydrogenase	Valine, leucine, and isoleucine metabolism
R_ACOAD9m_pos	57	0.325252	0.602679	0.673269	ACOAD9m	2-methylacyl-coa dehydrogenase, 2-Methylprop-2-enoyl-CoA forming	Valine, leucine, and isoleucine metabolism
R_ACOADH100_m_pos	27	-0.562768	0.0951774	0.143538	ACOADH100_m	Acyl-CoA dehydrogenase (10:0)	Fatty acid oxidation
R_ACOADH120_m_pos	27	-0.554566	0.0951774	0.143538	ACOADH120_m	Acyl-CoA dehydrogenase (12:0)	Fatty acid oxidation
R_ACOADH160_m_pos	27	-0.554969	0.0951774	0.143538	ACOADH160_m	Acyl-CoA dehydrogenase (16:0)	Fatty acid oxidation
R_ACOADH60_m_pos	27	-0.543078	0.0951774	0.143538	ACOADH60_m	Acyl-CoA dehydrogenase (6:0)	Fatty acid oxidation
R_ACOAH_neg	77	1.06095	0.0381281	0.0718944	ACOAH	Acetyl-CoA hydrolase	Pyruvate metabolism
R_ACOAHim_pos	91	1.77067	0.000797809	0.0123231	ACOAHim	Acetyl CoA hydrolase mitochondrial irreversible	Pyruvate metabolism
R_ACOAO4p_pos	94	1.90198	0.000226244	0.00830347	ACOAO4p	Acyl CoA oxidase decanoyl CoA peroxisomal	Fatty acid oxidation
R_ACOAO5p_pos	94	1.90198	0.000226244	0.00830347	ACOAO5p	Acyl CoA oxidase dodecanoyl CoA peroxisomal	Fatty acid oxidation
R_ACOAO7p_pos	89	1.61748	0.00164325	0.0139691	ACOAO7p	Acyl CoA oxidase hexadecanoyl CoA peroxisomal	Fatty acid oxidation
R_ACOAO8p_pos	88	1.82964	0.00228626	0.0165261	ACOAO8p	Acyl CoA oxidase octadecanoyl CoA peroxisomal	Fatty acid oxidation
R_ACOAR2m_neg	68	0.58317	0.175411	0.24229	ACOAR2m	Trans-2-enoyl-CoA reductase (NADPH) (C6:0)	Fatty acid oxidation
R_ACOAR2m_pos	24	-0.649649	0.056192	0.0958446	ACOAR2m	Trans-2-enoyl-CoA reductase (NADPH) (C6:0)	Fatty acid oxidation
R_ACOAR4m_neg	81	1.19497	0.0158966	0.0405158	ACOAR4m	Trans-2-enoyl-CoA reductase (NADPH) (C10:0)	Fatty acid oxidation
R_ACOAR4m_pos	23	-0.739216	0.0464515	0.0828554	ACOAR4m	Trans-2-enoyl-CoA reductase (NADPH) (C10:0)	Fatty acid oxidation
R_ACOAR5m_neg	80	1.15887	0.0200405	0.0465357	ACOAR5m	Trans-2-enoyl-CoA reductase (NADPH) (C12:0)	Fatty acid oxidation
R_ACOAR5m_pos	23	-0.750101	0.0464515	0.0828554	ACOAR5m	Trans-2-enoyl-CoA reductase (NADPH) (C12:0)	Fatty acid oxidation
R_ACOAR7m_neg	60	0.269787	0.456097	0.540863	ACOAR7m	Trans-2-enoyl-CoA reductase (NADPH) (C16:0)	Fatty acid oxidation
R_ACOAR7m_pos	23	-0.739848	0.0464515	0.0828554	ACOAR7m	Trans-2-enoyl-CoA reductase (NADPH) (C16:0)	Fatty acid oxidation
R_ACODA_pos	50	-0.0382541	1	1	ACODA	Acetylornithine deacetylase	Urea cycle
R_ACONT_neg	34	-0.965207	0.260979	0.340299	ACONT	Aconitate hydratase	Citric acid cycle
R_ACONT_pos	34	-0.965207	0.260979	0.340299	ACONT	Aconitate hydratase	Citric acid cycle
R_ACONTm_neg	34	-0.965207	0.260979	0.340299	ACONTm	Aconitate hydratase	Citric acid cycle
R_ACONTm_pos	53	0.012882	0.823756	0.850386	ACONTm	Aconitate hydratase	Citric acid cycle
R_ACORNt_neg	50	-0.0382541	1	1	ACORNt	Diffusion of N(2)-Acetyl-L-Ornithine	Transport, extracellular
R_ACOX22x_pos	81	1.39377	0.0158966	0.0405158	ACOX22x	Acyl-Coenzyme A oxidase 2, branched chain	Bile acid synthesis
R_ACOX2x_pos	85	1.48215	0.00565611	0.0245801	ACOX2x	Acyl-Coenzyme A oxidase 2, branched chain	Bile acid synthesis
R_ACP1_FMN_pos	85	1.3402	0.00565611	0.0245801	ACP1_FMN	Acid phosphatase (FMN)	Vitamin B2 metabolism
R_ACP1e_pos	69	0.77298	0.151941	0.214831	ACP1e	Acid phosphatase extracellular secreted	Transport, extracellular
R_ACRNte_neg	89	1.67246	0.00164325	0.0139691	ACRNte	Transport of O-Acetylcarnitine	Transport, extracellular
R_ACRNte_pos	89	1.71085	0.00164325	0.0139691	ACRNte	Transport of O-Acetylcarnitine	Transport, extracellular
R_ACRNtm_neg	69	0.608912	0.151941	0.214831	ACRNtm	O acetylcarnintine transport into mitochondria via diffusion	Transport, mitochondrial
R_ACRNtm_pos	69	0.608912	0.151941	0.214831	ACRNtm	O acetylcarnintine transport into mitochondria via diffusion	Transport, mitochondrial
R_ACRNtp_neg	86	1.67061	0.0042391	0.0222853	ACRNtp	Acetylcarnitine transport out of peroxisome	Transport, peroxisomal
R_ACRNtp_pos	90	1.67316	0.00115504	0.0123231	ACRNtp	Acetylcarnitine transport out of peroxisome	Transport, peroxisomal
R_ACRNtr_neg	89	1.67246	0.00164325	0.0139691	ACRNtr	Transport of Acetyl Carnitine	Transport, extracellular
R_ACRNtr_pos	89	1.71085	0.00164325	0.0139691	ACRNtr	Transport of Acetyl Carnitine	Transport, extracellular
R_ACS2_pos	68	0.924001	0.175411	0.24229	ACS2	Acetyl-CoA synthase (propionate)	Propanoate metabolism
R_ACSRTNMT_pos	81	1.29545	0.0158966	0.0405158	ACSRTNMT	S-Adenosyl-L-homocysteine:N-acetylserotonin O-methyltransferase	Tryptophan metabolism
R_ACS_pos	50	0.209187	1	1	ACS	Acetyl-CoA synthetase	Glycolysis/gluconeogenesis
R_ACSm_pos	36	-0.333599	0.331162	0.414457	ACSm	Acetyl CoA synthetase	Glycolysis/gluconeogenesis
R_ACTHRtc_pos	75	1.17391	0.056192	0.0958446	ACTHRtc	Intra-Cellular Transport of Acetyl-Threonine	Transport, mitochondrial
R_ACTHRte_pos	75	1.17391	0.056192	0.0958446	ACTHRte	Extracellular Transport of Acetyl-Threonine	Transport, extracellular
R_ACTLMO_pos	79	1.30722	0.0250536	0.0536924	ACTLMO	Acetol monooxygenase	Pyruvate metabolism
R_ACTNMO_pos	84	1.54143	0.00744225	0.0264329	ACTNMO	Acetone monooxygenase	Pyruvate metabolism
R_ACTYRm_pos	83	1.39372	0.00969278	0.0304849	ACTYRm	Acetylation of Tyrosine	Tyrosine metabolism
R_ACTYRtc_pos	83	1.39372	0.00969278	0.0304849	ACTYRtc	Transport of N-Acetyl-Tyrosine into Cytosol	Transport, mitochondrial
R_ACTYRte_pos	83	1.39372	0.00969278	0.0304849	ACTYRte	Secretion of N-Acetyl-Tyrosine	Transport, extracellular
R_ACYP_pos	83	1.50623	0.00969278	0.0304849	ACYP	Acylphosphatase	Glycolysis/gluconeogenesis
R_ACt2m_neg	87	1.62015	0.00314361	0.0195418	ACt2m	Acetate mitochondrial transport via proton symport	Transport, mitochondrial
R_ACt2m_pos	43	-0.208133	0.655632	0.702434	ACt2m	Acetate mitochondrial transport via proton symport	Transport, mitochondrial
R_ACt2r_neg	82	1.49189	0.0124673	0.0352696	ACt2r	Acetate reversible transport via proton symport	Transport, extracellular
R_ACt2r_pos	82	1.49189	0.0124673	0.0352696	ACt2r	Acetate reversible transport via proton symport	Transport, extracellular
R_ACtg_neg	85	1.52445	0.00565611	0.0245801	ACtg	Acetate transport, Golgi apparatus	Transport, golgi apparatus
R_ACtp_neg	96	2.16574	8.33532e-05	0.00769926	ACtp	Acetate transport peroxisomal	Transport, peroxisomal
R_ADADir_pos	63	0.690837	0.331162	0.414457	ADADir	Deoxycytidine kinase	Pyrimidine catabolism
R_ADA_pos	37	-0.300383	0.370219	0.45494	ADA	Adenosine deaminase	Purine catabolism
R_ADAe_pos	33	-0.688047	0.229864	0.307805	ADAe	Adenosine deaminase, extracellular	Purine catabolism
R_ADCim_pos	82	1.21877	0.0124673	0.0352696	ADCim	Acetoacetate decarboxylation (irreversible), mitochondrial	Propanoate metabolism
R_ADD_pos	44	-0.113286	0.7103	0.749568	ADD	Adenine deaminase	Purine catabolism
R_ADEt_neg	70	0.74353	0.130805	0.189642	ADEt	Adenine transport via diffusion	Transport, extracellular
R_ADEt_pos	80	1.27304	0.0200405	0.0465357	ADEt	Adenine transport via diffusion	Transport, extracellular
R_ADK1_neg	48	-0.216351	0.940843	0.950233	ADK1	Adenylate kinase	Nucleotide interconversion
R_ADK1_pos	48	-0.216351	0.940843	0.950233	ADK1	Adenylate kinase	Nucleotide interconversion
R_ADK1m_neg	24	-1.21182	0.056192	0.0958446	ADK1m	Adenylate kinase mitochondrial	Nucleotide interconversion
R_ADK1m_pos	24	-1.21182	0.056192	0.0958446	ADK1m	Adenylate kinase mitochondrial	Nucleotide interconversion
R_ADK3_neg	48	-0.216351	0.940843	0.950233	ADK3	Adentylate kinase (GTP)	Nucleotide interconversion
R_ADK3_pos	48	-0.216351	0.940843	0.950233	ADK3	Adentylate kinase (GTP)	Nucleotide interconversion
R_ADK3m_neg	24	-1.21182	0.056192	0.0958446	ADK3m	Adentylate kinase GTP	Nucleotide interconversion
R_ADK3m_pos	24	-1.21182	0.056192	0.0958446	ADK3m	Adentylate kinase GTP	Nucleotide interconversion
R_ADKd_neg	46	-0.229725	0.823756	0.850386	ADKd	Adenylate kinase (d form)	Nucleotide interconversion
R_ADKd_pos	46	-0.229725	0.823756	0.850386	ADKd	Adenylate kinase (d form)	Nucleotide interconversion
R_ADMDC_pos	86	1.40702	0.0042391	0.0222853	ADMDC	Adenosylmethionine decarboxylase	Arginine and proline metabolism
R_ADNCYC_pos	58	0.500207	0.551631	0.629058	ADNCYC	Adenylate cyclase	Nucleotide interconversion
R_ADNK1_pos	62	0.538928	0.370219	0.45494	ADNK1	Adenosine kinase	Nucleotide interconversion
R_ADNK1m_pos	49	0.0876013	1	1	ADNK1m	Adenosine kinase, mitochondria	Nucleotide interconversion
R_ADNK3_pos	84	1.48698	0.00744225	0.0264329	ADNK3	Adenosine kinase	Purine synthesis
R_ADNK4_pos	84	1.48803	0.00744225	0.0264329	ADNK4	Adenosine kinase	Purine synthesis
R_ADNt2_neg	27	-0.781619	0.0951774	0.143538	ADNt2	Adenosine transport in via proton symport	Transport, extracellular
R_ADNt2_pos	28	-0.620451	0.111943	0.166021	ADNt2	Adenosine transport in via proton symport	Transport, extracellular
R_ADNt4_pos	39	-0.465681	0.456097	0.540863	ADNt4	Adenosine transport (Na/Adn cotransport)	Transport, extracellular
R_ADNt5_pos	30	-0.665982	0.151941	0.214831	ADNt5	Adenosine transport (1:2 Na/Adn cotransport)	Transport, extracellular
R_ADNt_neg	39	-0.465681	0.456097	0.540863	ADNt	Adenosine facilated transport in cytosol	Transport, extracellular
R_ADNt_pos	28	-0.610677	0.111943	0.166021	ADNt	Adenosine facilated transport in cytosol	Transport, extracellular
R_ADNtl_pos	88	1.6629	0.00228626	0.0165261	ADNtl	Adenosine facilated transport from lysosome	Transport, lysosomal
R_ADNtm_neg	75	1.10153	0.056192	0.0958446	ADNtm	Equilibrative nucleoside transporter, mitochondrial	Transport, mitochondrial
R_ADNtm_pos	78	1.13016	0.0310312	0.0617975	ADNtm	Equilibrative nucleoside transporter, mitochondrial	Transport, mitochondrial
R_ADPACDAc_pos	85	1.55609	0.00565611	0.0245801	ADPACDAc	Activation of adipic acid for formation of adipoyl carnitine	Fatty acid oxidation
R_ADPACTD_pos	85	1.55549	0.00565611	0.0245801	ADPACTD	Transport into cytosol (diffusion)	Fatty acid oxidation
R_ADPACtd_neg	86	1.7116	0.0042391	0.0222853	ADPACtd	Transport of Adipic Acid, Diffusion	Transport, extracellular
R_ADPACtd_pos	89	1.92238	0.00164325	0.0139691	ADPACtd	Transport of Adipic Acid, Diffusion	Transport, extracellular
R_ADPCOACROT_neg	85	1.55549	0.00565611	0.0245801	ADPCOACROT	Production of adipoyl carnitine	Fatty acid oxidation
R_ADPCOACROT_pos	90	1.96038	0.00115504	0.0123231	ADPCOACROT	Production of adipoyl carnitine	Fatty acid oxidation
R_ADPCOAPTE_pos	85	1.55549	0.00565611	0.0245801	ADPCOAPTE	Thioesterification of adipoyl coA for release into cytosol	Fatty acid oxidation
R_ADPMAN_pos	81	1.29082	0.0158966	0.0405158	ADPMAN	ADPmannose diphosphatase	Nucleotide interconversion
R_ADPOHc_neg	76	1.33817	0.0464515	0.0828554	ADPOHc	Hydroxylation of 2-Oxoadipate	Lysine metabolism
R_ADPOHc_pos	67	0.706121	0.201369	0.273076	ADPOHc	Hydroxylation of 2-Oxoadipate	Lysine metabolism
R_ADPOHt_neg	76	1.33817	0.0464515	0.0828554	ADPOHt	Secretion of 2-Hydroxyadipic Acid	Transport, extracellular
R_ADPOHt_pos	67	0.706121	0.201369	0.273076	ADPOHt	Secretion of 2-Hydroxyadipic Acid	Transport, extracellular
R_ADPRDP_pos	62	0.779414	0.370219	0.45494	ADPRDP	ADPribose diphosphatase	Nucleotide interconversion
R_ADPRIBt_pos	34	-0.641798	0.260979	0.340299	ADPRIBt	ADPribose transport	Transport, extracellular
R_ADPT_pos	81	1.27837	0.0158966	0.0405158	ADPT	Adenine phosphoribosyltransferase	Nucleotide salvage pathway
R_ADRNCOAtx_neg	91	1.9749	0.000797809	0.0123231	ADRNCOAtx	Fatty acid intracellular transport	Transport, peroxisomal
R_ADRNCOAtx_pos	90	1.96369	0.00115504	0.0123231	ADRNCOAtx	Fatty acid intracellular transport	Transport, peroxisomal
R_ADRNCPT1_pos	89	1.58841	0.00164325	0.0139691	ADRNCPT1	Carnitine O-palmitoyltransferase	Fatty acid oxidation
R_ADRNCPT2_pos	89	1.58841	0.00164325	0.0139691	ADRNCPT2	Carnitine transferase	Fatty acid oxidation
R_ADRNCRNt_neg	73	0.847758	0.0804001	0.124359	ADRNCRNt	Transport into the mitochondria (carnitine)	Fatty acid oxidation
R_ADRNCRNt_pos	73	0.847758	0.0804001	0.124359	ADRNCRNt	Transport into the mitochondria (carnitine)	Fatty acid oxidation
R_ADRNLPVESSEC_1_pos	45	0.00144738	0.766432	0.801003	ADRNLPVESSEC_1	Adrenaline Secretion via Secretory Vesicle (ATP Driven)	Transport, extracellular
R_ADRNLtu_neg	81	1.32933	0.0158966	0.0405158	ADRNLtu	Adrenaline (epinephrine) transport, uniport	Transport, extracellular
R_ADRNLtu_pos	45	0.00010664	0.766432	0.801003	ADRNLtu	Adrenaline (epinephrine) transport, uniport	Transport, extracellular
R_ADRNt_neg	85	1.48781	0.00565611	0.0245801	ADRNt	Fatty acid transport via diffusion	Transport, extracellular
R_ADRNt_pos	90	1.50087	0.00115504	0.0123231	ADRNt	Fatty acid transport via diffusion	Transport, extracellular
R_ADSK_pos	63	0.615383	0.331162	0.414457	ADSK	Adenylyl-sulfate kinase	Nucleotide interconversion
R_ADSL1r_pos	32	-0.588051	0.201369	0.273076	ADSL1r	Adenylsuccinate lyase	Nucleotide interconversion
R_ADSL2r_pos	43	-0.149773	0.655632	0.702434	ADSL2r	Adenylosuccinate lyase	Purine synthesis
R_ADSS_pos	32	-0.588051	0.201369	0.273076	ADSS	Adenylosuccinate synthase	Nucleotide interconversion
R_AFLATOXINte_pos	75	1.30903	0.056192	0.0958446	AFLATOXINte	Xenobiotic transport	Transport, extracellular
R_AG13T16g_pos	84	1.4819	0.00744225	0.0264329	AG13T16g	N-acetyllactosaminide beta-1,3-N-acetylglucosaminyltransferase, Golgi apparatus	Keratan sulfate synthesis
R_AG13T17g_pos	84	1.4819	0.00744225	0.0264329	AG13T17g	N-acetyllactosaminide beta-1,3-N-acetylglucosaminyltransferase, Golgi apparatus	Keratan sulfate synthesis
R_AG13T18g_pos	84	1.4819	0.00744225	0.0264329	AG13T18g	N-acetyllactosaminide beta-1,3-N-acetylglucosaminyltransferase, Golgi apparatus	Keratan sulfate synthesis
R_AG13T1g_pos	84	1.47763	0.00744225	0.0264329	AG13T1g	N-acetyllactosaminide beta-1,3-N-acetylglucosaminyltransferase, Golgi apparatus	Keratan sulfate synthesis
R_AG13T2g_pos	84	1.47763	0.00744225	0.0264329	AG13T2g	N-acetyllactosaminide beta-1,3-N-acetylglucosaminyltransferase, Golgi apparatus	Keratan sulfate synthesis
R_AG13T3g_pos	84	1.47763	0.00744225	0.0264329	AG13T3g	N-acetyllactosaminide beta-1,3-N-acetylglucosaminyltransferase, Golgi apparatus	Keratan sulfate synthesis
R_AGDC_pos	85	1.14716	0.00565611	0.0245801	AGDC	N-acetylglucosamine-6-phosphate deacetylase	Aminosugar metabolism
R_AGMTm_pos	54	0.212888	0.766432	0.801003	AGMTm	Agmatinase (m)	Arginine and proline metabolism
R_AGMt_m_neg	70	0.716474	0.130805	0.189642	AGMt_m	Agmatine transport from cytosol to the mitochondria	Transport, mitochondrial
R_AGMt_m_pos	75	1.10383	0.056192	0.0958446	AGMt_m	Agmatine transport from cytosol to the mitochondria	Transport, mitochondrial
R_AGPAT1_1_pos	81	1.48913	0.0158966	0.0405158	AGPAT1_1	1-Acylglycerol-3-Phosphate O-Acyltransferase 1	Triacylglycerol synthesis
R_AGPAT4_pos	90	1.71384	0.00115504	0.0123231	AGPAT4	1-Acylglycerol-3-Phosphate O-Acyltransferase 1 (C18:2)	Glycerophospholipid metabolism
R_AGPOP_pos	17	-1.42529	0.0124673	0.0352696	AGPOP	DGTP:pyruvate 2-O-phosphotransferase, cytosol	Glycolysis/gluconeogenesis
R_AGRMte_neg	75	1.10383	0.056192	0.0958446	AGRMte	Transport of Agmatinium into Extracellular Space	Transport, extracellular
R_AGRMte_pos	70	0.716474	0.130805	0.189642	AGRMte	Transport of Agmatinium into Extracellular Space	Transport, extracellular
R_AGTim_pos	75	1.1628	0.056192	0.0958446	AGTim	Alanine---glyoxylate aminotransferase	Alanine and aspartate metabolism
R_AGTix_pos	79	1.28345	0.0250536	0.0536924	AGTix	Alanine---glyoxylate aminotransferase, glyoxysome	Alanine and aspartate metabolism
R_AHANDROSTANGLCte_pos	73	1.17048	0.0804001	0.124359	AHANDROSTANGLCte	Glucuronidated compound transport	Transport, extracellular
R_AHANDROSTANGLCtr_neg	73	1.17048	0.0804001	0.124359	AHANDROSTANGLCtr	Glucuronidated compound transport	Transport, endoplasmic reticular
R_AHANDROSTANte_pos	90	1.69497	0.00115504	0.0123231	AHANDROSTANte	Transport of 3Alpha-Hydroxy-5Beta-Androstan-17-One, Extracellular	Transport, extracellular
R_AHANDROSTANtr_pos	90	1.69497	0.00115504	0.0123231	AHANDROSTANtr	Transport of 3Alpha-Hydroxy-5Beta-Androstan-17-One, Endoplasmatic Reticulum	Transport, endoplasmic reticular
R_AHCYSte_neg	82	1.34289	0.0124673	0.0352696	AHCYSte	Transport of S-adenosyl-L-homocysteine	Transport, extracellular
R_AHCYSte_pos	80	1.29319	0.0200405	0.0465357	AHCYSte	Transport of S-adenosyl-L-homocysteine	Transport, extracellular
R_AHCYStm_neg	82	1.35281	0.0124673	0.0352696	AHCYStm	S adenosyl L homocysteine reversible transport mitochondrial	Transport, mitochondrial
R_AHCYStm_pos	82	1.35281	0.0124673	0.0352696	AHCYStm	S adenosyl L homocysteine reversible transport mitochondrial	Transport, mitochondrial
R_AHCYStr_neg	91	1.83003	0.000797809	0.0123231	AHCYStr	S-Adenosyl-L-homocysteine intracellular diffusion	Transport, endoplasmic reticular
R_AHCYStr_pos	79	1.41625	0.0250536	0.0536924	AHCYStr	S-Adenosyl-L-homocysteine intracellular diffusion	Transport, endoplasmic reticular
R_AHCi_neg	78	1.33243	0.0310312	0.0617975	AHCi	Adenosylhomocysteinase	Methionine and cysteine metabolism
R_AHCi_pos	67	0.962115	0.201369	0.273076	AHCi	Adenosylhomocysteinase	Methionine and cysteine metabolism
R_AHEXASE2ly_pos	72	0.839482	0.0951774	0.143538	AHEXASE2ly	Beta-N-acetylhexosaminidase, lysosomal	N-glycan degradation
R_AHEXASEly_pos	77	1.19352	0.0381281	0.0718944	AHEXASEly	Beta-N-acetylhexosaminidase, lysosomal	N-glycan degradation
R_AICART_neg	75	1.0556	0.056192	0.0958446	AICART	Phosphoribosylaminoimidazolecarboxamide formyltransferase	Purine synthesis
R_AICART_pos	43	-0.140807	0.655632	0.702434	AICART	Phosphoribosylaminoimidazolecarboxamide formyltransferase	Purine synthesis
R_AICARte_neg	84	1.62103	0.00744225	0.0264329	AICARte	Transport of 5-amino-1-(5-phospho-D-ribosyl)imidazole-4-carboxamide(2-)	Transport, extracellular
R_AICARte_pos	72	0.84082	0.0951774	0.143538	AICARte	Transport of 5-amino-1-(5-phospho-D-ribosyl)imidazole-4-carboxamide(2-)	Transport, extracellular
R_AIRCr_pos	43	-0.149773	0.655632	0.702434	AIRCr	Phosphoribosylaminoimidazole carboxylase	Purine synthesis
R_AK2LGCHOLABCt_pos	90	1.87429	0.00115504	0.0123231	AK2LGCHOLABCt	1-Alkyl 2-Acylglycerol 3-Phosphocholine Transport	Transport, extracellular
R_AK2LGCHOLt_pos	90	1.87429	0.00115504	0.0123231	AK2LGCHOLt	1-Alkyl 2-Acylglycerol 3-Phosphocholine Transport, Vescicular	Transport, extracellular
R_AKGCITtm_neg	35	-1.15014	0.294725	0.375028	AKGCITtm	Dicarboxylate/tricarboxylate carrier (akg:cit), mitochondrial	Transport, mitochondrial
R_AKGCITtm_pos	35	-1.15014	0.294725	0.375028	AKGCITtm	Dicarboxylate/tricarboxylate carrier (akg:cit), mitochondrial	Transport, mitochondrial
R_AKGDm_pos	71	0.761785	0.111943	0.166021	AKGDm	2-oxoglutarate dehydrogenase	Citric acid cycle
R_AKGICITtm_neg	35	-1.15014	0.294725	0.375028	AKGICITtm	Dicarboxylate/tricarboxylate carrier (akg:icit), mitochondrial	Transport, peroxisomal
R_AKGICITtm_pos	35	-1.15014	0.294725	0.375028	AKGICITtm	Dicarboxylate/tricarboxylate carrier (akg:icit), mitochondrial	Transport, peroxisomal
R_AKGMALtm_neg	34	-1.16817	0.260979	0.340299	AKGMALtm	Dicarboxylate/tricarboxylate carrier (mal:akg), mitochondrial	Transport, mitochondrial
R_AKGMALtm_pos	34	-1.14791	0.260979	0.340299	AKGMALtm	Dicarboxylate/tricarboxylate carrier (mal:akg), mitochondrial	Transport, mitochondrial
R_AKGt4_3_neg	51	-0.0724096	0.940843	0.950233	AKGt4_3	AKG transport via sodium symport	Transport, extracellular
R_AKGt4_3_pos	26	-0.88855	0.0804001	0.124359	AKGt4_3	AKG transport via sodium symport	Transport, extracellular
R_AKR1C1_pos	79	1.26008	0.0250536	0.0536924	AKR1C1	Aldo-keto reductase family 1, member C1 (chlordecone reductase; 3-alpha hydroxysteroid dehydrogenase, type I; dihydrodiol dehydrogenase 4)	Steroid metabolism
R_AKR1C41_pos	62	0.394979	0.370219	0.45494	AKR1C41	Aldo-keto reductase family 1, member C4 (chlordecone reductase; 3-alpha hydroxysteroid dehydrogenase, type I; dihydrodiol dehydrogenase 4)	Bile acid synthesis
R_AKR1C42_pos	62	0.394979	0.370219	0.45494	AKR1C42	Aldo-keto reductase family 1, member C4 (chlordecone reductase; 3-alpha hydroxysteroid dehydrogenase, type I; dihydrodiol dehydrogenase 4)	Bile acid synthesis
R_AKR1D2_pos	83	1.43628	0.00969278	0.0304849	AKR1D2	Aldo-keto reductase family 1, member D1 (delta 4-3-ketosteroid-5-beta-reductase)	Bile acid synthesis
R_AKR1D_pos	75	1.05373	0.056192	0.0958446	AKR1D	Aldo-keto reductase family 1, member D1 (delta 4-3-ketosteroid-5-beta-reductase)	Bile acid synthesis
R_ALAALACNc_neg	78	1.29903	0.0310312	0.0617975	ALAALACNc	Hydrolysis of Alanylalanine	Transport, extracellular
R_ALAALACNc_pos	56	0.294594	0.655632	0.702434	ALAALACNc	Hydrolysis of Alanylalanine	Transport, extracellular
R_ALAALAPEPT1tc_pos	59	0.438459	0.502727	0.581969	ALAALAPEPT1tc	Transport of Alanylalanine by the apical PEPT1 amino acid transporters across the brush border cells of the enterocytes of the intestine and renal cells	Transport, extracellular
R_ALAARGCYSr_neg	60	0.404886	0.456097	0.540863	ALAARGCYSr	Metabolism (Formation/Degradation) of AlaArgCys	Peptide metabolism
R_ALAARGCYSr_pos	59	0.331856	0.502727	0.581969	ALAARGCYSr	Metabolism (Formation/Degradation) of AlaArgCys	Peptide metabolism
R_ALAARGCYSt_neg	60	0.404886	0.456097	0.540863	ALAARGCYSt	Transport of AlaArgCys, Extracellular	Transport, extracellular
R_ALAARGCYSt_pos	59	0.331856	0.502727	0.581969	ALAARGCYSt	Transport of AlaArgCys, Extracellular	Transport, extracellular
R_ALAARGGLYr_neg	76	1.23735	0.0464515	0.0828554	ALAARGGLYr	Metabolism (Formation/Degradation) of AlaArgGly	Peptide metabolism
R_ALAARGGLYr_pos	51	0.000951924	0.940843	0.950233	ALAARGGLYr	Metabolism (Formation/Degradation) of AlaArgGly	Peptide metabolism
R_ALAARGGLYt_neg	76	1.23735	0.0464515	0.0828554	ALAARGGLYt	Transport of AlaArgGly, Extracellular	Transport, extracellular
R_ALAARGGLYt_pos	51	0.000951924	0.940843	0.950233	ALAARGGLYt	Transport of AlaArgGly, Extracellular	Transport, extracellular
R_ALAASNLEUr_neg	43	-0.199635	0.655632	0.702434	ALAASNLEUr	Metabolism (Formation/Degradation) of AlaAsnLeu	Peptide metabolism
R_ALAASNLEUr_pos	68	0.592892	0.175411	0.24229	ALAASNLEUr	Metabolism (Formation/Degradation) of AlaAsnLeu	Peptide metabolism
R_ALAASNLEUt_neg	43	-0.199635	0.655632	0.702434	ALAASNLEUt	Transport of AlaAsnLeu, Extracellular	Transport, extracellular
R_ALAASNLEUt_pos	68	0.592892	0.175411	0.24229	ALAASNLEUt	Transport of AlaAsnLeu, Extracellular	Transport, extracellular
R_ALAASNNaEx_pos	14	-1.49282	0.00565611	0.0245801	ALAASNNaEx	L-alanine/L-asparagine Na-dependent exchange (Ala-L in)	Transport, extracellular
R_ALAATB0tc_pos	29	-1.05617	0.130805	0.189642	ALAATB0tc	Transport of L-Alanine into the intestinal cells by ATB0 transporter	Transport, extracellular
R_ALAB0AT3tc_pos	22	-1.32345	0.0381281	0.0718944	ALAB0AT3tc	Alanine Transport by B0At3	Transport, extracellular
R_ALACYSNaEx_pos	14	-1.6672	0.00565611	0.0245801	ALACYSNaEx	L-alanine/L-cysteine Na-dependent exchange (Ala-L in)	Transport, extracellular
R_ALADGLNexR_neg	6	-1.87225	0.000357228	0.0097357	ALADGLNexR	L-alanine/glutamine reversible exchange	Transport, extracellular
R_ALADGLNexR_pos	5	-1.80298	0.000226244	0.00830347	ALADGLNexR	L-alanine/glutamine reversible exchange	Transport, extracellular
R_ALADGLYexR_neg	6	-1.80985	0.000357228	0.0097357	ALADGLYexR	D-alanine/glycine reversible exchange	Transport, extracellular
R_ALADGLYexR_pos	6	-1.57481	0.000357228	0.0097357	ALADGLYexR	D-alanine/glycine reversible exchange	Transport, extracellular
R_ALAGLNNaEx_pos	12	-1.68846	0.00314361	0.0195418	ALAGLNNaEx	L-alanine/L-glutamine Na-dependent exchange (Ala-L in)	Transport, extracellular
R_ALAGLNexR_neg	5	-1.69239	0.000226244	0.00830347	ALAGLNexR	L-alanine/glutamine reversible exchange	Transport, extracellular
R_ALAGLNexR_pos	5	-1.69239	0.000226244	0.00830347	ALAGLNexR	L-alanine/glutamine reversible exchange	Transport, extracellular
R_ALAGLYLYSr_neg	57	0.271706	0.602679	0.673269	ALAGLYLYSr	Metabolism (Formation/Degradation) of AlaGlyLys	Peptide metabolism
R_ALAGLYLYSr_pos	60	0.372374	0.456097	0.540863	ALAGLYLYSr	Metabolism (Formation/Degradation) of AlaGlyLys	Peptide metabolism
R_ALAGLYLYSt_neg	57	0.271706	0.602679	0.673269	ALAGLYLYSt	Transport of AlaGlyLys, Extracellular	Transport, extracellular
R_ALAGLYLYSt_pos	60	0.372374	0.456097	0.540863	ALAGLYLYSt	Transport of AlaGlyLys, Extracellular	Transport, extracellular
R_ALAGLYexR_neg	4	-1.85316	0.000142891	0.00812649	ALAGLYexR	L-alanine/glycine reversible exchange	Transport, extracellular
R_ALAGLYexR_pos	11	-1.50206	0.00228626	0.0165261	ALAGLYexR	L-alanine/glycine reversible exchange	Transport, extracellular
R_ALAHISALAr_neg	50	0.0554945	1	1	ALAHISALAr	Metabolism (Formation/Degradation) of AlaHisAla	Peptide metabolism
R_ALAHISALAr_pos	65	0.489605	0.260979	0.340299	ALAHISALAr	Metabolism (Formation/Degradation) of AlaHisAla	Peptide metabolism
R_ALAHISALAt_neg	50	0.0554945	1	1	ALAHISALAt	Transport of AlaHisAla, Extracellular	Transport, extracellular
R_ALAHISALAt_pos	65	0.489605	0.260979	0.340299	ALAHISALAt	Transport of AlaHisAla, Extracellular	Transport, extracellular
R_ALALYSTHRr_neg	55	0.132857	0.7103	0.749568	ALALYSTHRr	Metabolism (Formation/Degradation) of AlaLysThr	Peptide metabolism
R_ALALYSTHRr_pos	60	0.372374	0.456097	0.540863	ALALYSTHRr	Metabolism (Formation/Degradation) of AlaLysThr	Peptide metabolism
R_ALALYSTHRt_neg	55	0.132857	0.7103	0.749568	ALALYSTHRt	Transport of AlaLysThr, Extracellular	Transport, extracellular
R_ALALYSTHRt_pos	60	0.372374	0.456097	0.540863	ALALYSTHRt	Transport of AlaLysThr, Extracellular	Transport, extracellular
R_ALAPAT4te_neg	19	-1.18091	0.0200405	0.0465357	ALAPAT4te	Transport of Alanine via Pat4	Transport, extracellular
R_ALAPAT4te_pos	10	-1.50071	0.00164325	0.0139691	ALAPAT4te	Transport of Alanine via Pat4	Transport, extracellular
R_ALAR_neg	55	0.144127	0.7103	0.749568	ALAR	Alanine racemase	Alanine and aspartate metabolism
R_ALAR_pos	53	0.145847	0.823756	0.850386	ALAR	Alanine racemase	Alanine and aspartate metabolism
R_ALASERNaEx_pos	18	-1.48396	0.0158966	0.0405158	ALASERNaEx	L-alanine/L-serine Na-dependent exchange (Ala-L in)	Transport, extracellular
R_ALASm_pos	34	-0.708942	0.260979	0.340299	ALASm	5 aminolevulinate synthase	Glycine, serine, alanine, and threonine metabolism
R_ALATA_L_neg	48	-0.0493986	0.940843	0.950233	ALATA_L	L-alanine transaminase	Glutamate metabolism
R_ALATA_L_pos	6	-2.15686	0.000357228	0.0097357	ALATA_L	L-alanine transaminase	Glutamate metabolism
R_ALATA_Lm_neg	19	-1.34326	0.0200405	0.0465357	ALATA_Lm	L alanine transaminase mitochondrial	Citric acid cycle
R_ALATA_Lm_pos	19	-1.34326	0.0200405	0.0465357	ALATA_Lm	L alanine transaminase mitochondrial	Citric acid cycle
R_ALATHRNaEx_pos	18	-1.48049	0.0158966	0.0405158	ALATHRNaEx	L-alanine/L-threonine Na-dependent exchange (Ala-L in)	Transport, extracellular
R_ALA_DTDe_pos	11	-1.33264	0.00228626	0.0165261	ALA_DTDe	Exit of D-alanine from the enterocytes	Transport, extracellular
R_ALAt2r_neg	22	-1.18763	0.0381281	0.0718944	ALAt2r	L alanine reversible transport via proton symport	Transport, extracellular
R_ALAt2r_pos	23	-1.1654	0.0464515	0.0828554	ALAt2r	L alanine reversible transport via proton symport	Transport, extracellular
R_ALAt4_pos	27	-1.05239	0.0951774	0.143538	ALAt4	Alanine-Sodium symporter	Transport, extracellular
R_ALAtN1_neg	5	-1.78169	0.000226244	0.00830347	ALAtN1	Alanine transport (Na, H coupled)	Transport, extracellular
R_ALAtN1_pos	5	-1.69239	0.000226244	0.00830347	ALAtN1	Alanine transport (Na, H coupled)	Transport, extracellular
R_ALAtmi_neg	54	0.125093	0.766432	0.801003	ALAtmi	Alanine transport from mitochondia to cytoplasm	Transport, mitochondrial
R_ALAyLATthc_pos	22	-1.1807	0.0381281	0.0718944	ALAyLATthc	Transport of Alanine by y+LAT1 or y+LAT2 with co-transporter of h in small intestine and kidney	Transport, extracellular
R_ALCD19y_neg	81	1.54387	0.0158966	0.0405158	ALCD19y	Alcohol dehydrogenase glycerol NADP	Glycerophospholipid metabolism
R_ALCD1_neg	40	-0.130171	0.502727	0.581969	ALCD1	Alcohol dehydrogenase (methanol)	Miscellaneous
R_ALCD1_pos	68	0.487206	0.175411	0.24229	ALCD1	Alcohol dehydrogenase (methanol)	Miscellaneous
R_ALCD21_D_pos	31	-1.14665	0.175411	0.24229	ALCD21_D	Alcohol dehydrogenase (D-1,2-propanediol)	Pyruvate metabolism
R_ALCD22_D_pos	56	-0.0087157	0.655632	0.702434	ALCD22_D	Alcohol dehydrogenase (D-lactaldehyde)	Pyruvate metabolism
R_ALCD22_L_pos	12	-1.20496	0.00314361	0.0195418	ALCD22_L	Alcohol dehydrogenase (L-lactaldehyde)	Pyruvate metabolism
R_ALCD2x_pos	76	1.2708	0.0464515	0.0828554	ALCD2x	Alcohol dehydrogenase (ethanol)	Glycolysis/gluconeogenesis
R_ALCD2y_pos	76	1.35163	0.0464515	0.0828554	ALCD2y	Alcohol dehydrogenase (ethanol, NADP)	Glycolysis/gluconeogenesis
R_ALDD19x_P_neg	4	-2.06874	0.000142891	0.00812649	ALDD19x_P	Aldehyde dehydrogenase (phenylacetaldehyde, NADP)	Phenylalanine metabolism
R_ALDD19x_P_pos	82	1.43194	0.0124673	0.0352696	ALDD19x_P	Aldehyde dehydrogenase (phenylacetaldehyde, NADP)	Phenylalanine metabolism
R_ALDD19xr_pos	4	-2.06874	0.000142891	0.00812649	ALDD19xr	Aldehyde dehydrogenase (phenylacetaldehyde, NAD)	Phenylalanine metabolism
R_ALDD20x_pos	80	1.35622	0.0200405	0.0465357	ALDD20x	Aldehyde dehydrogenase (indole-3-acetaldehyde, NAD)	Tryptophan metabolism
R_ALDD20xm_pos	81	1.26153	0.0158966	0.0405158	ALDD20xm	Aldehyde dehydrogenase indole 3 acetaldehyde NAD mitochondrial	Tryptophan metabolism
R_ALDD21_pos	84	1.5437	0.00744225	0.0264329	ALDD21	Aldehyde dehydrogenase (pristanal, NAD)	Fatty acid oxidation
R_ALDD2x_pos	33	-0.4393	0.229864	0.307805	ALDD2x	Aldehyde dehydrogenase (acetaldehyde, NAD)	Glycolysis/gluconeogenesis
R_ALDD2xm_pos	75	0.880292	0.056192	0.0958446	ALDD2xm	Aldehyde dehydrogenase acetylaldehyde NAD mitochondrial	Glycolysis/gluconeogenesis
R_ALDD2y_pos	62	0.453479	0.370219	0.45494	ALDD2y	Aldehyde dehydrogenase (acetaldehyde, NADP)	Glycolysis/gluconeogenesis
R_ALDSTRNte_pos	80	1.39415	0.0200405	0.0465357	ALDSTRNte	Aldosterone transport	Transport, extracellular
R_ALDSTRNtm_neg	80	1.39415	0.0200405	0.0465357	ALDSTRNtm	Aldosterone intracellular transport	Transport, mitochondrial
R_ALLOP1tu_pos	59	0.234679	0.502727	0.581969	ALLOP1tu	Uptake of allopurinol by the enterocytes	Drug metabolism
R_ALLOP2tu_pos	46	-0.112774	0.823756	0.850386	ALLOP2tu	Uptake of allopurinol by the enterocytes	Drug metabolism
R_ALLOPOXDhep_pos	95	1.62715	0.000142891	0.00812649	ALLOPOXDhep	Oxidation of allopurinol to oxypurinol in hepatocytes	Drug metabolism
R_ALLOPtepvb_neg	59	0.234679	0.502727	0.581969	ALLOPtepvb	Uptake of allopurinol by the hepatocytes	Drug metabolism
R_ALLOPtepvb_pos	95	1.62715	0.000142891	0.00812649	ALLOPtepvb	Uptake of allopurinol by the hepatocytes	Drug metabolism
R_ALLTNti_neg	89	1.65656	0.00164325	0.0139691	ALLTNti	Allantoin irreversible uniport	Transport, extracellular
R_ALLTNti_pos	83	1.25658	0.00969278	0.0304849	ALLTNti	Allantoin irreversible uniport	Transport, extracellular
R_ALOX12_pos	72	0.915019	0.0951774	0.143538	ALOX12	Arachidonate 12-lipoxygenase	Eicosanoid metabolism
R_ALOX15_pos	73	1.0096	0.0804001	0.124359	ALOX15	Arachidonate 15-lipoxygenase	Eicosanoid metabolism
R_ALOX52_pos	67	0.658339	0.201369	0.273076	ALOX52	Arachidonate 5-lipoxygenase	Eicosanoid metabolism
R_ALOX5_pos	78	1.24644	0.0310312	0.0617975	ALOX5	Arachidonate 5-lipoxygenase	Eicosanoid metabolism
R_ALR2_pos	12	-1.20496	0.00314361	0.0195418	ALR2	Aldose reductase (methylglyoxal)	Pyruvate metabolism
R_ALR3_pos	12	-1.20496	0.00314361	0.0195418	ALR3	Aldose reductase (acetol)	Pyruvate metabolism
R_ALR_pos	80	1.31272	0.0200405	0.0465357	ALR	Aldose reductase	Pyruvate metabolism
R_AM19CSALThr_pos	80	1.37008	0.0200405	0.0465357	AM19CSALThr	Alternative pathway for formation of AM19 from AM1 in hepatocytes	Drug metabolism
R_AM19CShr_pos	78	1.35063	0.0310312	0.0617975	AM19CShr	Oxidation of AM9 to AM19 (cyclosporine) in hepatocytes	Drug metabolism
R_AM19CSitr_pos	79	1.36935	0.0250536	0.0536924	AM19CSitr	AM19CSitr	Drug metabolism
R_AM19CSteb_pos	90	1.69497	0.00115504	0.0123231	AM19CSteb	Efflux of AM19-cyclosporine into bile	Drug metabolism
R_AM1A4NCShc_pos	78	1.31511	0.0310312	0.0617975	AM1A4NCShc	Demethylation of AM1A to AM1A4N in hepatocytes	Drug metabolism
R_AM1A4NCSteb_pos	78	1.31511	0.0310312	0.0617975	AM1A4NCSteb	Efflux of AM1A4N-cyclosporine into bile	Drug metabolism
R_AM1ACCShr_pos	79	1.39405	0.0250536	0.0536924	AM1ACCShr	Oxidation of AM1c to AM1Ac in hepatocytes (alternative mechanism)	Drug metabolism
R_AM1ACCSitr_neg	79	1.39405	0.0250536	0.0536924	AM1ACCSitr	AM1ACCSitr	Drug metabolism
R_AM1ACCStev_pos	79	1.39405	0.0250536	0.0536924	AM1ACCStev	Efflux of AM1Ac-cyclosporine into hepatic vein	Drug metabolism
R_AM1ACShr_pos	79	1.33665	0.0250536	0.0536924	AM1ACShr	Formation of AM1A-cyclosporine in hepatocytes	Drug metabolism
R_AM1ACSitr_pos	79	1.33665	0.0250536	0.0536924	AM1ACSitr	AM1ACSitr	Drug metabolism
R_AM1ACSteb_pos	90	1.69497	0.00115504	0.0123231	AM1ACSteb	Efflux of AM1A-cyclosporine into bile	Drug metabolism
R_AM1ACStep_neg	90	1.69498	0.00115504	0.0123231	AM1ACStep	Efflux of AM1A (cyclosporine) into portal blood	Drug metabolism
R_AM1ACStep_pos	79	1.33665	0.0250536	0.0536924	AM1ACStep	Efflux of AM1A (cyclosporine) into portal blood	Drug metabolism
R_AM1ALCShr_pos	79	1.35557	0.0250536	0.0536924	AM1ALCShr	Formation of AM1AL-cyclosporine in hepatocytes	Drug metabolism
R_AM1ALCSitr_pos	79	1.33665	0.0250536	0.0536924	AM1ALCSitr	AM1ALCSitr	Drug metabolism
R_AM1ALCSteb_pos	90	1.69497	0.00115504	0.0123231	AM1ALCSteb	Efflux of AM1AL-cyclosporine into bile	Drug metabolism
R_AM1ALCStep_neg	90	1.69497	0.00115504	0.0123231	AM1ALCStep	Efflux of AM1AL (cyclosporine) into portal blood	Drug metabolism
R_AM1ALCStep_pos	79	1.35557	0.0250536	0.0536924	AM1ALCStep	Efflux of AM1AL (cyclosporine) into portal blood	Drug metabolism
R_AM1C4N9CShc_pos	80	1.40326	0.0200405	0.0465357	AM1C4N9CShc	Demethylation of AM1c9 to AM1c4N9 in hepatocytes (alternative mechanism)	Drug metabolism
R_AM1C4N9CSteb_pos	80	1.40326	0.0200405	0.0465357	AM1C4N9CSteb	Efflux of AM1c4N9-cyclosporine into bile	Drug metabolism
R_AM1C9CShr_pos	78	1.34173	0.0310312	0.0617975	AM1C9CShr	Oxidation of AM1c to AM1c9 in hepatocytes (alternative mechanism)	Drug metabolism
R_AM1C9CSitr_pos	78	1.34173	0.0310312	0.0617975	AM1C9CSitr	AM1C9CSitr	Drug metabolism
R_AM1C9CSteb_pos	90	1.69497	0.00115504	0.0123231	AM1C9CSteb	Efflux of AM1c9-cyclosporine into bile	Drug metabolism
R_AM1C9CStev_neg	90	1.69498	0.00115504	0.0123231	AM1C9CStev	Efflux of AM1c9-cyclosporine into hepatic vein	Drug metabolism
R_AM1C9CStev_pos	78	1.34173	0.0310312	0.0617975	AM1C9CStev	Efflux of AM1c9-cyclosporine into hepatic vein	Drug metabolism
R_AM1CCShr_pos	79	1.35299	0.0250536	0.0536924	AM1CCShr	Oxidation of cyclosporine to AM1c in hepatocytes	Drug metabolism
R_AM1CCSitr_neg	78	1.38174	0.0310312	0.0617975	AM1CCSitr	AM1CCSitr	Drug metabolism
R_AM1CCSitr_pos	79	1.35299	0.0250536	0.0536924	AM1CCSitr	AM1CCSitr	Drug metabolism
R_AM1CCSteb_pos	90	1.69497	0.00115504	0.0123231	AM1CCSteb	Efflux of AM1c-cyclosporine into bile	Drug metabolism
R_AM1CCStev_neg	90	1.69497	0.00115504	0.0123231	AM1CCStev	Efflux of AM1c-cyclosporine into hepatic vein	Drug metabolism
R_AM1CCStev_pos	79	1.35299	0.0250536	0.0536924	AM1CCStev	Efflux of AM1c-cyclosporine into hepatic vein	Drug metabolism
R_AM1CGLChr_pos	81	1.42882	0.0158966	0.0405158	AM1CGLChr	Glucuronidation of AM1c in hepatocytes	Drug metabolism
R_AM1CGLCitr_neg	81	1.42882	0.0158966	0.0405158	AM1CGLCitr	AM1CGLCitr	Drug metabolism
R_AM1CGLCteb_pos	81	1.42882	0.0158966	0.0405158	AM1CGLCteb	Efflux of AM1c-glucuronide into bile	Drug metabolism
R_AM1CSAhr_pos	82	1.38078	0.0124673	0.0352696	AM1CSAhr	Oxidation of cyclosporine to AM1 in hepatocytes	Drug metabolism
R_AM1CSAitr_neg	82	1.38078	0.0124673	0.0352696	AM1CSAitr	AM1CSAitr	Drug metabolism
R_AM1CSAitr_pos	82	1.38078	0.0124673	0.0352696	AM1CSAitr	AM1CSAitr	Drug metabolism
R_AM1CSAtep_neg	90	1.69499	0.00115504	0.0123231	AM1CSAtep	Efflux of AM1 (cyclosporine) into portal blood	Drug metabolism
R_AM1CSAtep_pos	82	1.38078	0.0124673	0.0352696	AM1CSAtep	Efflux of AM1 (cyclosporine) into portal blood	Drug metabolism
R_AM4N9CShc_pos	78	1.35877	0.0310312	0.0617975	AM4N9CShc	Demethylation of AM9 to AM4N9 in hepatocytes	Drug metabolism
R_AM4N9CShr_pos	78	1.34135	0.0310312	0.0617975	AM4N9CShr	Oxidation of AM4N to AM4N9 in hepatocytes	Drug metabolism
R_AM4N9CSitr_pos	78	1.34135	0.0310312	0.0617975	AM4N9CSitr	AM4N9CSitr	Drug metabolism
R_AM4N9CStev_neg	90	1.69497	0.00115504	0.0123231	AM4N9CStev	Efflux of AM4N9-cyclosporine into hepatic vein	Drug metabolism
R_AM4N9CStev_pos	78	1.34411	0.0310312	0.0617975	AM4N9CStev	Efflux of AM4N9-cyclosporine into hepatic vein	Drug metabolism
R_AM4NC9CSteb_pos	90	1.69498	0.00115504	0.0123231	AM4NC9CSteb	Efflux of AM4N9-cyclosporine into bile	Drug metabolism
R_AM4NCShr_pos	77	1.31355	0.0381281	0.0718944	AM4NCShr	Demethylation of cyclosporine to AM4N in hepatocytes	Drug metabolism
R_AM4NCSitr_pos	78	1.34135	0.0310312	0.0617975	AM4NCSitr	AM4NCSitr	Drug metabolism
R_AM4NCSteb_pos	90	1.69498	0.00115504	0.0123231	AM4NCSteb	Efflux of AM4N-cyclosporine into bile	Drug metabolism
R_AM4NCStep_neg	90	1.69497	0.00115504	0.0123231	AM4NCStep	Efflux of AM4N (cyclosporine) into portal blood	Drug metabolism
R_AM4NCStep_pos	77	1.31355	0.0381281	0.0718944	AM4NCStep	Efflux of AM4N (cyclosporine) into portal blood	Drug metabolism
R_AM6SAD_pos	80	1.30874	0.0200405	0.0465357	AM6SAD	Aminomuconate-semialdehyde dehydrogenase	Tryptophan metabolism
R_AM9CSAhr_pos	82	1.38078	0.0124673	0.0352696	AM9CSAhr	Oxidation of cyclosporine to AM9 in hepatocytes	Drug metabolism
R_AM9CSAitr_neg	79	1.35299	0.0250536	0.0536924	AM9CSAitr	AM9CSAitr	Drug metabolism
R_AM9CSAitr_pos	82	1.38078	0.0124673	0.0352696	AM9CSAitr	AM9CSAitr	Drug metabolism
R_AM9CSAteb_pos	90	1.69497	0.00115504	0.0123231	AM9CSAteb	Efflux of AM9-cyclosporine into bile	Drug metabolism
R_AM9CSAtep_neg	90	1.69337	0.00115504	0.0123231	AM9CSAtep	Efflux of AM9 (cyclosporine) into portal blood	Drug metabolism
R_AM9CSAtep_pos	82	1.38078	0.0124673	0.0352696	AM9CSAtep	Efflux of AM9 (cyclosporine) into portal blood	Drug metabolism
R_AMACR2p_pos	82	1.43245	0.0124673	0.0352696	AMACR2p	Alpha-methylacyl-CoA racemase (reductase)	Bile acid synthesis
R_AMACRp_pos	85	1.48215	0.00565611	0.0245801	AMACRp	Alpha-methylacyl-CoA racemase	Bile acid synthesis
R_AMANK_pos	74	0.876949	0.0674446	0.109256	AMANK	N-acetyl-D-mannosamine kinase	Aminosugar metabolism
R_AMCOXO_pos	80	1.30874	0.0200405	0.0465357	AMCOXO	2-aminomuconate reductase	Tryptophan metabolism
R_AMETAMte_neg	78	1.34354	0.0310312	0.0617975	AMETAMte	Assumed Passive Diffusion into Extracellular Space	Transport, extracellular
R_AMETAMte_pos	82	1.35766	0.0124673	0.0352696	AMETAMte	Assumed Passive Diffusion into Extracellular Space	Transport, extracellular
R_AMETr_neg	79	1.41625	0.0250536	0.0536924	AMETr	S-Adenosyl-L-methionine intracellular diffusion	Transport, endoplasmic reticular
R_AMETr_pos	91	1.83003	0.000797809	0.0123231	AMETr	S-Adenosyl-L-methionine intracellular diffusion	Transport, endoplasmic reticular
R_AMETt2m_neg	82	1.35281	0.0124673	0.0352696	AMETt2m	S-Adenosyl-L-methionine reversible transport, mitochondrial	Transport, mitochondrial
R_AMETt2m_pos	82	1.35281	0.0124673	0.0352696	AMETt2m	S-Adenosyl-L-methionine reversible transport, mitochondrial	Transport, mitochondrial
R_AMETt_neg	79	1.31248	0.0250536	0.0536924	AMETt	Transport of S-Adenosyl-L-Methionine, Paracellular Transport	Transport, extracellular
R_AMETt_pos	82	1.3334	0.0124673	0.0352696	AMETt	Transport of S-Adenosyl-L-Methionine, Paracellular Transport	Transport, extracellular
R_AMETtm_neg	82	1.35281	0.0124673	0.0352696	AMETtm	S Adenosyl L methionine reversible transport mitochondrial	Transport, mitochondrial
R_AMETtm_pos	82	1.35281	0.0124673	0.0352696	AMETtm	S Adenosyl L methionine reversible transport mitochondrial	Transport, mitochondrial
R_AMPDA_pos	32	-0.584195	0.201369	0.273076	AMPDA	Adenosine monophosphate deaminase	Nucleotide interconversion
R_AMPTASECG_pos	12	-1.63744	0.00314361	0.0195418	AMPTASECG	Alanyl aminopeptidase (cys-gly)	Glutathione metabolism
R_AMPTASECGe_pos	17	-1.52654	0.0124673	0.0352696	AMPTASECGe	Alanyl aminopeptidase (cys-gly) (e)	Glutathione metabolism
R_AMPTASEPG_neg	44	-0.040569	0.7103	0.749568	AMPTASEPG	Aminopeptidase (pro-gly)	Transport, extracellular
R_AMPTASEPG_pos	68	0.664506	0.175411	0.24229	AMPTASEPG	Aminopeptidase (pro-gly)	Transport, extracellular
R_AMPtn_pos	81	1.33832	0.0158966	0.0405158	AMPtn	AMP transport via diffusion cytosol to nucleus	Transport, nuclear
R_AMPtp_neg	74	1.29933	0.0674446	0.109256	AMPtp	AMP transporter, peroxisome	Transport, peroxisomal
R_AMPtp_pos	74	1.29933	0.0674446	0.109256	AMPtp	AMP transporter, peroxisome	Transport, peroxisomal
R_AMY1e_pos	75	1.03085	0.056192	0.0958446	AMY1e	Alpha-amylase, extracellular (strch1 -> strch2)	Starch and sucrose metabolism
R_AMY2e_pos	75	1.03085	0.056192	0.0958446	AMY2e	Alpha-amylase, extracellular (glygn2 -> glygn4)	Starch and sucrose metabolism
R_AND19ONEc_pos	72	1.06914	0.0951774	0.143538	AND19ONEc	Hydroxylation of Androst-4-Ene-3, 17-Dione	Steroid metabolism
R_AND19ONEt_pos	72	1.06914	0.0951774	0.143538	AND19ONEt	Secretion of 19-Hydroxyandrost-4-Ene-3, 17-Dione	Transport, extracellular
R_ANDRSTANDRte_pos	72	0.919761	0.0951774	0.143538	ANDRSTANDRte	Transport of 5Alpha-Androstane-3, 17-Dione, Extracellular	Transport, extracellular
R_ANDRSTANDRtr_pos	66	0.606181	0.229864	0.307805	ANDRSTANDRtr	Transport of 5Alpha-Androstane-3, 17-Dione, Endoplasmatic Reticulum	Transport, endoplasmic reticular
R_ANDRSTNDNte_pos	70	1.02119	0.130805	0.189642	ANDRSTNDNte	Transport of Androst-4-Ene-3, 17-Dione, Extracellular	Transport, extracellular
R_ANDRSTRNGLCte_pos	74	0.963624	0.0674446	0.109256	ANDRSTRNGLCte	Glucuronidated compound transport	Transport, extracellular
R_ANDRSTRNGLCtr_neg	74	0.963624	0.0674446	0.109256	ANDRSTRNGLCtr	Glucuronidated compound transport (ER)	Transport, endoplasmic reticular
R_ANDRSTRNte_neg	67	0.792835	0.201369	0.273076	ANDRSTRNte	Androsterone transport	Transport, extracellular
R_ANDRSTRNte_pos	87	1.40351	0.00314361	0.0195418	ANDRSTRNte	Androsterone transport	Transport, extracellular
R_ANDRSTRNtr_neg	66	0.606181	0.229864	0.307805	ANDRSTRNtr	Androsterone intracellular transport	Transport, endoplasmic reticular
R_ANDRSTRNtr_pos	68	1.009	0.175411	0.24229	ANDRSTRNtr	Androsterone intracellular transport	Transport, endoplasmic reticular
R_ANTHte_neg	75	1.04221	0.056192	0.0958446	ANTHte	Transport of anthranilate	Transport, extracellular
R_ANTIPYRENEte_pos	64	0.164404	0.294725	0.375028	ANTIPYRENEte	Xenobiotic transport	Transport, extracellular
R_AOBUTDsm_pos	52	0.231461	0.881984	0.896311	AOBUTDsm	L-2-amino-3-oxobutanoate decarboxylation, mitochondrial (spontaneous)	Glycine, serine, alanine, and threonine metabolism
R_APAT2rm_neg	61	0.523164	0.411896	0.496012	APAT2rm	3-Aminopropanoate:2-oxoglutarate aminotransferase (m)	Beta-Alanine metabolism
R_APAT2rm_pos	60	0.41049	0.456097	0.540863	APAT2rm	3-Aminopropanoate:2-oxoglutarate aminotransferase (m)	Beta-Alanine metabolism
R_APNNOXte_neg	76	1.29322	0.0464515	0.0828554	APNNOXte	Xenobiotic transport	Transport, extracellular
R_APNPT_pos	90	1.76342	0.00115504	0.0123231	APNPT	ATP:pantetheine 4-phosphotransferase	CoA synthesis
R_APOCF_pos	67	0.668099	0.201369	0.273076	APOCF	Apocarboxylase formation	Biotin metabolism
R_APOCFm_pos	62	0.506459	0.370219	0.45494	APOCFm	Apocarboxylase formation, mitochondrial	Biotin metabolism
R_APOC_LYS_BTNP_pos	67	0.668099	0.201369	0.273076	APOC_LYS_BTNP	Proteolysis of apoC-Lys-btn	Biotin metabolism
R_APOC_LYS_BTNPm_pos	62	0.506459	0.370219	0.45494	APOC_LYS_BTNPm	Proteolysis of apoC-Lys-btn, mitochondrial	Biotin metabolism
R_APPNNte_pos	76	1.29322	0.0464515	0.0828554	APPNNte	Xenobiotic transport	Transport, extracellular
R_APRGSTRNABCt_pos	84	1.48007	0.00744225	0.0264329	APRGSTRNABCt	Hydroxyprogesterone Transport, Active	Transport, extracellular
R_APRGSTRNt1e_neg	35	-1.01196	0.294725	0.375028	APRGSTRNt1e	Hydroxyprogesterone Transport, Antiport	Transport, extracellular
R_APRGSTRNt1e_pos	33	-0.537036	0.229864	0.307805	APRGSTRNt1e	Hydroxyprogesterone Transport, Antiport	Transport, extracellular
R_APRGSTRNte_neg	33	-0.537036	0.229864	0.307805	APRGSTRNte	Hydroxyprogesterone transport	Transport, extracellular
R_APRGSTRNte_pos	35	-1.01196	0.294725	0.375028	APRGSTRNte	Hydroxyprogesterone transport	Transport, extracellular
R_APRTO2_pos	88	1.66705	0.00228626	0.0165261	APRTO2	N acetylputrescine oxygen oxireductase deaminating	Arginine and proline metabolism
R_AQCOBALt_pos	86	1.70501	0.0042391	0.0222853	AQCOBALt	Aquacob(III)alamin uptake	Transport, extracellular
R_ARABR_pos	77	1.28998	0.0381281	0.0718944	ARABR	Arabinose reductase	Pentose phosphate pathway
R_ARAB_Lt_pos	77	1.28998	0.0381281	0.0718944	ARAB_Lt	L arabinoase extracellular transport	Transport, extracellular
R_ARACHCOAtx_neg	79	1.19372	0.0250536	0.0536924	ARACHCOAtx	Fatty acid intracellular transport	Transport, peroxisomal
R_ARACHCOAtx_pos	89	1.84389	0.00164325	0.0139691	ARACHCOAtx	Fatty acid intracellular transport	Transport, peroxisomal
R_ARACHCPT1_neg	75	0.98285	0.056192	0.0958446	ARACHCPT1	Carnitine transferase	Fatty acid oxidation
R_ARACHCPT1_pos	80	1.14967	0.0200405	0.0465357	ARACHCPT1	Carnitine transferase	Fatty acid oxidation
R_ARACHCPT2_neg	75	0.98285	0.056192	0.0958446	ARACHCPT2	Carnitine transferase	Fatty acid oxidation
R_ARACHCPT2_pos	80	1.14967	0.0200405	0.0465357	ARACHCPT2	Carnitine transferase	Fatty acid oxidation
R_ARACHCRNt_neg	73	0.847758	0.0804001	0.124359	ARACHCRNt	Transport into the mitochondria (carnitine)	Fatty acid oxidation
R_ARACHCRNt_pos	73	0.847758	0.0804001	0.124359	ARACHCRNt	Transport into the mitochondria (carnitine)	Fatty acid oxidation
R_ARACHDCOAtx_neg	78	1.16843	0.0310312	0.0617975	ARACHDCOAtx	Fatty acid intracellular transport	Transport, peroxisomal
R_ARACHDCOAtx_pos	77	1.26769	0.0381281	0.0718944	ARACHDCOAtx	Fatty acid intracellular transport	Transport, peroxisomal
R_ARACHDFATPtc_pos	73	0.920022	0.0804001	0.124359	ARACHDFATPtc	Arachidonate (N-C18:1) Transport by FATP	Transport, extracellular
R_ARACHDt2_neg	59	0.0371341	0.502727	0.581969	ARACHDt2	Fatty acid transport via diffusion	Transport, extracellular
R_ARACHDt2_pos	75	0.500366	0.056192	0.0958446	ARACHDt2	Fatty acid transport via diffusion	Transport, extracellular
R_ARACHETH_pos	81	1.49041	0.0158966	0.0405158	ARACHETH	Formation of O-Arachidonoyl Ethanolamine	Glycerophospholipid metabolism
R_ARACHFATPc_pos	80	1.39626	0.0200405	0.0465357	ARACHFATPc	Uptake of arachidate by the enterocytes	Transport, extracellular
R_ARACHt_neg	84	1.43901	0.00744225	0.0264329	ARACHt	Fatty acid transport via diffusion	Transport, extracellular
R_ARACHt_pos	91	1.50135	0.000797809	0.0123231	ARACHt	Fatty acid transport via diffusion	Transport, extracellular
R_ARGALAALAr_neg	59	0.273118	0.502727	0.581969	ARGALAALAr	Metabolism (Formation/Degradation) of ArgAlaAla	Peptide metabolism
R_ARGALAALAr_pos	78	1.29618	0.0310312	0.0617975	ARGALAALAr	Metabolism (Formation/Degradation) of ArgAlaAla	Peptide metabolism
R_ARGALAALAt_neg	78	1.29618	0.0310312	0.0617975	ARGALAALAt	Transport of ArgAlaAla, Extracellular	Transport, extracellular
R_ARGALAALAt_pos	59	0.273118	0.502727	0.581969	ARGALAALAt	Transport of ArgAlaAla, Extracellular	Transport, extracellular
R_ARGALAPHEr_neg	56	0.14799	0.655632	0.702434	ARGALAPHEr	Metabolism (Formation/Degradation) of ArgAlaPhe	Peptide metabolism
R_ARGALAPHEr_pos	53	0.118071	0.823756	0.850386	ARGALAPHEr	Metabolism (Formation/Degradation) of ArgAlaPhe	Peptide metabolism
R_ARGALAPHEt_neg	56	0.14799	0.655632	0.702434	ARGALAPHEt	Transport of ArgAlaPhe, Extracellular	Transport, extracellular
R_ARGALAPHEt_pos	53	0.118071	0.823756	0.850386	ARGALAPHEt	Transport of ArgAlaPhe, Extracellular	Transport, extracellular
R_ARGALATHRr_neg	54	0.124424	0.766432	0.801003	ARGALATHRr	Metabolism (Formation/Degradation) of ArgAlaThr	Peptide metabolism
R_ARGALATHRr_pos	52	0.0521822	0.881984	0.896311	ARGALATHRr	Metabolism (Formation/Degradation) of ArgAlaThr	Peptide metabolism
R_ARGALATHRt_neg	54	0.124424	0.766432	0.801003	ARGALATHRt	Transport of ArgAlaThr, Extracellular	Transport, extracellular
R_ARGALATHRt_pos	52	0.0521822	0.881984	0.896311	ARGALATHRt	Transport of ArgAlaThr, Extracellular	Transport, extracellular
R_ARGARGLYSr_neg	60	0.436276	0.456097	0.540863	ARGARGLYSr	Metabolism (Formation/Degradation) of ArgArgLys	Peptide metabolism
R_ARGARGLYSr_pos	56	0.210403	0.655632	0.702434	ARGARGLYSr	Metabolism (Formation/Degradation) of ArgArgLys	Peptide metabolism
R_ARGARGLYSt_neg	60	0.436276	0.456097	0.540863	ARGARGLYSt	Transport of ArgArgLys, Extracellular	Transport, extracellular
R_ARGARGLYSt_pos	56	0.210403	0.655632	0.702434	ARGARGLYSt	Transport of ArgArgLys, Extracellular	Transport, extracellular
R_ARGARGMETr_neg	56	0.125481	0.655632	0.702434	ARGARGMETr	Metabolism (Formation/Degradation) of ArgArgMet	Peptide metabolism
R_ARGARGMETr_pos	56	0.257864	0.655632	0.702434	ARGARGMETr	Metabolism (Formation/Degradation) of ArgArgMet	Peptide metabolism
R_ARGARGMETt_neg	56	0.125481	0.655632	0.702434	ARGARGMETt	Transport of ArgArgMet, Extracellular	Transport, extracellular
R_ARGARGMETt_pos	56	0.257864	0.655632	0.702434	ARGARGMETt	Transport of ArgArgMet, Extracellular	Transport, extracellular
R_ARGARGr_neg	58	0.572359	0.551631	0.629058	ARGARGr	Metabolism (Formation/Degradation) of ArgArg	Peptide metabolism
R_ARGARGr_pos	67	0.544078	0.201369	0.273076	ARGARGr	Metabolism (Formation/Degradation) of ArgArg	Peptide metabolism
R_ARGARGt_neg	58	0.572359	0.551631	0.629058	ARGARGt	Transport of ArgArg, Extracellular	Transport, extracellular
R_ARGARGt_pos	67	0.544078	0.201369	0.273076	ARGARGt	Transport of ArgArg, Extracellular	Transport, extracellular
R_ARGATB0tc_pos	34	-0.737654	0.260979	0.340299	ARGATB0tc	Transport of L-Arginine into the intestinal cells by ATB0 transporter	Transport, extracellular
R_ARGB0AT3tc_pos	45	-0.304311	0.766432	0.801003	ARGB0AT3tc	Arginine Transport by B0At3	Transport, extracellular
R_ARGCYSGLYr_neg	50	-0.0557264	1	1	ARGCYSGLYr	Metabolism (Formation/Degradation) of ArgCysGly	Peptide metabolism
R_ARGCYSGLYr_pos	56	0.157559	0.655632	0.702434	ARGCYSGLYr	Metabolism (Formation/Degradation) of ArgCysGly	Peptide metabolism
R_ARGCYSGLYt_neg	50	-0.0557264	1	1	ARGCYSGLYt	Transport of ArgCysGly, Extracellular	Transport, extracellular
R_ARGCYSGLYt_pos	56	0.157559	0.655632	0.702434	ARGCYSGLYt	Transport of ArgCysGly, Extracellular	Transport, extracellular
R_ARGCYSSERr_neg	35	-0.782252	0.294725	0.375028	ARGCYSSERr	Metabolism (Formation/Degradation) of ArgCysSer	Peptide metabolism
R_ARGCYSSERr_pos	52	0.101516	0.881984	0.896311	ARGCYSSERr	Metabolism (Formation/Degradation) of ArgCysSer	Peptide metabolism
R_ARGCYSSERt_neg	35	-0.782252	0.294725	0.375028	ARGCYSSERt	Transport of ArgCysSer, Extracellular	Transport, extracellular
R_ARGCYSSERt_pos	52	0.101516	0.881984	0.896311	ARGCYSSERt	Transport of ArgCysSer, Extracellular	Transport, extracellular
R_ARGDCm_pos	70	0.716474	0.130805	0.189642	ARGDCm	Arginine decarboxylase, mitochondrial	Arginine and proline metabolism
R_ARGDr_pos	75	1.21616	0.056192	0.0958446	ARGDr	Arginine deiminase	Arginine and proline metabolism
R_ARGGLUGLUr_neg	60	0.700625	0.456097	0.540863	ARGGLUGLUr	Metabolism (Formation/Degradation) of ArgGluGlu	Peptide metabolism
R_ARGGLUGLUr_pos	56	0.257838	0.655632	0.702434	ARGGLUGLUr	Metabolism (Formation/Degradation) of ArgGluGlu	Peptide metabolism
R_ARGGLUGLUt_neg	60	0.700625	0.456097	0.540863	ARGGLUGLUt	Transport of ArgGluGlu, Extracellular	Transport, extracellular
R_ARGGLUGLUt_pos	56	0.257838	0.655632	0.702434	ARGGLUGLUt	Transport of ArgGluGlu, Extracellular	Transport, extracellular
R_ARGGLUPROr_neg	49	0.333697	1	1	ARGGLUPROr	Metabolism (Formation/Degradation) of ArgGluPro	Peptide metabolism
R_ARGGLUPROr_pos	52	0.101516	0.881984	0.896311	ARGGLUPROr	Metabolism (Formation/Degradation) of ArgGluPro	Peptide metabolism
R_ARGGLUPROt_neg	49	0.333697	1	1	ARGGLUPROt	Transport of ArgGluPro, Extracellular	Transport, extracellular
R_ARGGLUPROt_pos	52	0.101516	0.881984	0.896311	ARGGLUPROt	Transport of ArgGluPro, Extracellular	Transport, extracellular
R_ARGGLYGLYr_neg	62	0.425891	0.370219	0.45494	ARGGLYGLYr	Metabolism (Formation/Degradation) of ArgGlyGly	Peptide metabolism
R_ARGGLYGLYr_pos	57	0.393384	0.602679	0.673269	ARGGLYGLYr	Metabolism (Formation/Degradation) of ArgGlyGly	Peptide metabolism
R_ARGGLYGLYt_neg	57	0.393384	0.602679	0.673269	ARGGLYGLYt	Transport of ArgGlyGly, Extracellular	Transport, extracellular
R_ARGGLYGLYt_pos	62	0.425891	0.370219	0.45494	ARGGLYGLYt	Transport of ArgGlyGly, Extracellular	Transport, extracellular
R_ARGHISTHRr_neg	57	0.194807	0.602679	0.673269	ARGHISTHRr	Metabolism (Formation/Degradation) of ArgHisThr	Peptide metabolism
R_ARGHISTHRr_pos	56	0.145284	0.655632	0.702434	ARGHISTHRr	Metabolism (Formation/Degradation) of ArgHisThr	Peptide metabolism
R_ARGHISTHRt_neg	57	0.194807	0.602679	0.673269	ARGHISTHRt	Transport of ArgHisThr, Extracellular	Transport, extracellular
R_ARGHISTHRt_pos	56	0.145284	0.655632	0.702434	ARGHISTHRt	Transport of ArgHisThr, Extracellular	Transport, extracellular
R_ARGLEUPHEr_neg	56	0.220257	0.655632	0.702434	ARGLEUPHEr	Metabolism (Formation/Degradation) of ArgLeuPhe	Peptide metabolism
R_ARGLEUPHEr_pos	64	0.462839	0.294725	0.375028	ARGLEUPHEr	Metabolism (Formation/Degradation) of ArgLeuPhe	Peptide metabolism
R_ARGLEUPHEt_neg	56	0.220257	0.655632	0.702434	ARGLEUPHEt	Transport of ArgLeuPhe, Extracellular	Transport, extracellular
R_ARGLEUPHEt_pos	64	0.462839	0.294725	0.375028	ARGLEUPHEt	Transport of ArgLeuPhe, Extracellular	Transport, extracellular
R_ARGLYSASPr_neg	51	0.0934002	0.940843	0.950233	ARGLYSASPr	Metabolism (Formation/Degradation) of ArgLysAsp	Peptide metabolism
R_ARGLYSASPr_pos	56	0.242081	0.655632	0.702434	ARGLYSASPr	Metabolism (Formation/Degradation) of ArgLysAsp	Peptide metabolism
R_ARGLYSASPt_neg	51	0.0934002	0.940843	0.950233	ARGLYSASPt	Transport of ArgLysAsp, Extracellular	Transport, extracellular
R_ARGLYSASPt_pos	56	0.242081	0.655632	0.702434	ARGLYSASPt	Transport of ArgLysAsp, Extracellular	Transport, extracellular
R_ARGLYSex_pos	4	-1.69709	0.000142891	0.00812649	ARGLYSex	Arginine/Lysine exchanger (Arg in)	Transport, extracellular
R_ARGN1ASPMDte_pos	80	1.28767	0.0200405	0.0465357	ARGN1ASPMDte	Transport by Y+Lat-2 into Extracellular Space	Transport, extracellular
R_ARGN_pos	54	0.450762	0.766432	0.801003	ARGN	Arginase	Urea cycle
R_ARGNm_pos	50	0.182757	1	1	ARGNm	Arginase (m)	Urea cycle
R_ARGORNt7_neg	10	-1.55162	0.00164325	0.0139691	ARGORNt7	Arginine/ornithine antiporter	Transport, extracellular
R_ARGORNt7_pos	14	-1.38739	0.00565611	0.0245801	ARGORNt7	Arginine/ornithine antiporter	Transport, extracellular
R_ARGPHEARGr_neg	57	0.355921	0.602679	0.673269	ARGPHEARGr	Metabolism (Formation/Degradation) of ArgPheArg	Peptide metabolism
R_ARGPHEARGr_pos	56	0.257838	0.655632	0.702434	ARGPHEARGr	Metabolism (Formation/Degradation) of ArgPheArg	Peptide metabolism
R_ARGPHEARGt_neg	57	0.355921	0.602679	0.673269	ARGPHEARGt	Transport of ArgPheArg, Extracellular	Transport, extracellular
R_ARGPHEARGt_pos	56	0.257838	0.655632	0.702434	ARGPHEARGt	Transport of ArgPheArg, Extracellular	Transport, extracellular
R_ARGPROMETr_neg	59	0.250036	0.502727	0.581969	ARGPROMETr	Metabolism (Formation/Degradation) of ArgProMet	Peptide metabolism
R_ARGPROMETr_pos	56	0.172838	0.655632	0.702434	ARGPROMETr	Metabolism (Formation/Degradation) of ArgProMet	Peptide metabolism
R_ARGPROMETt_neg	59	0.250036	0.502727	0.581969	ARGPROMETt	Transport of ArgProMet, Extracellular	Transport, extracellular
R_ARGPROMETt_pos	56	0.172838	0.655632	0.702434	ARGPROMETt	Transport of ArgProMet, Extracellular	Transport, extracellular
R_ARGPROTHRr_neg	58	0.207459	0.551631	0.629058	ARGPROTHRr	Metabolism (Formation/Degradation) of ArgProThr	Peptide metabolism
R_ARGPROTHRr_pos	52	0.101516	0.881984	0.896311	ARGPROTHRr	Metabolism (Formation/Degradation) of ArgProThr	Peptide metabolism
R_ARGPROTHRt_neg	58	0.207459	0.551631	0.629058	ARGPROTHRt	Transport of ArgProThr, Extracellular	Transport, extracellular
R_ARGPROTHRt_pos	52	0.101516	0.881984	0.896311	ARGPROTHRt	Transport of ArgProThr, Extracellular	Transport, extracellular
R_ARGSERSERr_neg	21	-0.890681	0.0310312	0.0617975	ARGSERSERr	Metabolism (Formation/Degradation) of ArgSerSer	Peptide metabolism
R_ARGSERSERr_pos	58	0.216346	0.551631	0.629058	ARGSERSERr	Metabolism (Formation/Degradation) of ArgSerSer	Peptide metabolism
R_ARGSERSERt_neg	21	-0.890681	0.0310312	0.0617975	ARGSERSERt	Transport of ArgSerSer, Extracellular	Transport, extracellular
R_ARGSERSERt_pos	58	0.216346	0.551631	0.629058	ARGSERSERt	Transport of ArgSerSer, Extracellular	Transport, extracellular
R_ARGSL_neg	67	0.661823	0.201369	0.273076	ARGSL	Argininosuccinate lyase	Alanine and aspartate metabolism
R_ARGSL_pos	75	1.19176	0.056192	0.0958446	ARGSL	Argininosuccinate lyase	Alanine and aspartate metabolism
R_ARGSS_pos	75	1.19176	0.056192	0.0958446	ARGSS	Argininosuccinate synthase	Alanine and aspartate metabolism
R_ARGSUCte_pos	64	0.744526	0.294725	0.375028	ARGSUCte	Transport of L-Arginosuccinic Acid	Transport, extracellular
R_ARGTYRVALr_neg	58	0.27982	0.551631	0.629058	ARGTYRVALr	Metabolism (Formation/Degradation) of ArgtyrVal	Peptide metabolism
R_ARGTYRVALr_pos	56	0.257838	0.655632	0.702434	ARGTYRVALr	Metabolism (Formation/Degradation) of ArgtyrVal	Peptide metabolism
R_ARGTYRVALt_neg	58	0.27982	0.551631	0.629058	ARGTYRVALt	Transport of ArgtyrVal, Extracellular	Transport, extracellular
R_ARGTYRVALt_pos	56	0.257838	0.655632	0.702434	ARGTYRVALt	Transport of ArgtyrVal, Extracellular	Transport, extracellular
R_ARGVALCYSr_neg	55	0.184583	0.7103	0.749568	ARGVALCYSr	Metabolism (Formation/Degradation) of ArgValCys	Peptide metabolism
R_ARGVALCYSr_pos	57	0.281773	0.602679	0.673269	ARGVALCYSr	Metabolism (Formation/Degradation) of ArgValCys	Peptide metabolism
R_ARGVALCYSt_neg	55	0.184583	0.7103	0.749568	ARGVALCYSt	Transport of ArgValCys, Extracellular	Transport, extracellular
R_ARGVALCYSt_pos	57	0.281773	0.602679	0.673269	ARGVALCYSt	Transport of ArgValCys, Extracellular	Transport, extracellular
R_ARGVALTRPr_neg	55	0.15993	0.7103	0.749568	ARGVALTRPr	Metabolism (Formation/Degradation) of ArgValTrp	Peptide metabolism
R_ARGVALTRPr_pos	56	0.186326	0.655632	0.702434	ARGVALTRPr	Metabolism (Formation/Degradation) of ArgValTrp	Peptide metabolism
R_ARGVALTRPt_neg	55	0.15993	0.7103	0.749568	ARGVALTRPt	Transport of ArgValTrp, Extracellular	Transport, extracellular
R_ARGVALTRPt_pos	56	0.186326	0.655632	0.702434	ARGVALTRPt	Transport of ArgValTrp, Extracellular	Transport, extracellular
R_ARG_Dte_pos	81	1.31155	0.0158966	0.0405158	ARG_Dte	Transport of D-Arginine, Extracellular	Transport, extracellular
R_ARG_Dtx_pos	81	1.31155	0.0158966	0.0405158	ARG_Dtx	Transport of D-Arginine, Peroxisome	Transport, peroxisomal
R_ARGt4_pos	34	-0.517214	0.260979	0.340299	ARGt4	L-arginine transport in via sodium symport	Transport, extracellular
R_ARGt5r_neg	4	-1.69709	0.000142891	0.00812649	ARGt5r	ARGtiDF	Transport, extracellular
R_ARGt5r_pos	22	-1.20428	0.0381281	0.0718944	ARGt5r	ARGtiDF	Transport, extracellular
R_ARGtm_neg	64	0.747751	0.294725	0.375028	ARGtm	Arginine mitochondrial transport via ornithine carrier	Transport, mitochondrial
R_ARGtm_pos	77	0.737803	0.0381281	0.0718944	ARGtm	Arginine mitochondrial transport via ornithine carrier	Transport, mitochondrial
R_ARSA_pos	86	1.49412	0.0042391	0.0222853	ARSA	Arylsulfatase A	Sphingolipid metabolism
R_ARTCOAL1_cho_pos	80	1.37166	0.0200405	0.0465357	ARTCOAL1_cho	R group coenzyme a ligase	R group synthesis
R_ARTCOAL2_cho_pos	80	1.37166	0.0200405	0.0465357	ARTCOAL2_cho	R group coenzyme a ligase	R group synthesis
R_ARTCOAL3_cho_pos	80	1.37166	0.0200405	0.0465357	ARTCOAL3_cho	R group coenzyme a ligase	R group synthesis
R_ARTFR208_pos	84	1.53753	0.00744225	0.0264329	ARTFR208	R group artificial flux	R group synthesis
R_ARTPLM3_pos	87	1.60975	0.00314361	0.0195418	ARTPLM3	R group to palmitate conversion	R group synthesis
R_ARTPLM3m_pos	88	1.66743	0.00228626	0.0165261	ARTPLM3m	R group to palmitate conversion	R group synthesis
R_ASAH1_pos	81	1.52499	0.0158966	0.0405158	ASAH1	N-acylsphingosine amidohydrolase	Sphingolipid metabolism
R_ASCBOX_1_pos	85	1.52841	0.00565611	0.0245801	ASCBOX_1	Ascorbic Acid Oxidase	Vitamin C metabolism
R_ASCBSVCTtc_pos	56	0.188387	0.655632	0.702434	ASCBSVCTtc	Transport of L-Ascorbate by SVCT1 or SVCT2 transporter	Transport, extracellular
R_ASCBt4_neg	40	-0.608176	0.502727	0.581969	ASCBt4	L-ascorbate transport via proton symport	Transport, extracellular
R_ASCBt4_pos	82	0.735717	0.0124673	0.0352696	ASCBt4	L-ascorbate transport via proton symport	Transport, extracellular
R_ASCBt5_pos	40	-0.608176	0.502727	0.581969	ASCBt5	L-ascorbate transport via proton symport (1:2 ascb/na ratio)	Transport, extracellular
R_ASCBt_neg	82	0.735717	0.0124673	0.0352696	ASCBt	L-ascorbate transport via facilitated diffusion	Transport, extracellular
R_ASCBt_pos	88	1.2972	0.00228626	0.0165261	ASCBt	L-ascorbate transport via facilitated diffusion	Transport, extracellular
R_ASNALANaEx_pos	14	-1.49601	0.00565611	0.0245801	ASNALANaEx	L-alanine/L-asparagine Na-dependent exchange (Asn-L in)	Transport, extracellular
R_ASNASNARGr_neg	44	-0.105647	0.7103	0.749568	ASNASNARGr	Metabolism (Formation/Degradation) of AsnAsnArg	Peptide metabolism
R_ASNASNARGr_pos	72	0.950842	0.0951774	0.143538	ASNASNARGr	Metabolism (Formation/Degradation) of AsnAsnArg	Peptide metabolism
R_ASNASNARGt_neg	44	-0.105647	0.7103	0.749568	ASNASNARGt	Transport of AsnAsnArg, Extracellular	Transport, extracellular
R_ASNASNARGt_pos	72	0.950842	0.0951774	0.143538	ASNASNARGt	Transport of AsnAsnArg, Extracellular	Transport, extracellular
R_ASNATB0tc_pos	28	-0.89815	0.111943	0.166021	ASNATB0tc	Transport of L-Asparagine into the intestinal cells by ATB0 transporter	Transport, extracellular
R_ASNB0AT3tc_pos	46	0.0321422	0.823756	0.850386	ASNB0AT3tc	Asparagine Transport by B0At3	Transport, extracellular
R_ASNCYSCYSr_neg	59	0.22171	0.502727	0.581969	ASNCYSCYSr	Metabolism (Formation/Degradation) of AsnCysCys	Peptide metabolism
R_ASNCYSCYSr_pos	69	0.677408	0.151941	0.214831	ASNCYSCYSr	Metabolism (Formation/Degradation) of AsnCysCys	Peptide metabolism
R_ASNCYSCYSt_neg	59	0.22171	0.502727	0.581969	ASNCYSCYSt	Transport of AsnCysCys, Extracellular	Transport, extracellular
R_ASNCYSCYSt_pos	69	0.677408	0.151941	0.214831	ASNCYSCYSt	Transport of AsnCysCys, Extracellular	Transport, extracellular
R_ASNCYSNaEx_pos	14	-1.49414	0.00565611	0.0245801	ASNCYSNaEx	L-cysteine/L-asparagine Na-dependent exchange (Asn-L in)	Transport, extracellular
R_ASNGLNNaEx_pos	14	-1.49282	0.00565611	0.0245801	ASNGLNNaEx	L-glutamine/L-asparagine Na-dependent exchange (Asn-L in)	Transport, extracellular
R_ASNMETPROr_neg	53	0.0887823	0.823756	0.850386	ASNMETPROr	Metabolism (Formation/Degradation) of AsnMetPro	Peptide metabolism
R_ASNMETPROr_pos	60	0.372374	0.456097	0.540863	ASNMETPROr	Metabolism (Formation/Degradation) of AsnMetPro	Peptide metabolism
R_ASNMETPROt_neg	53	0.0887823	0.823756	0.850386	ASNMETPROt	Transport of AsnMetPro, Extracellular	Transport, extracellular
R_ASNMETPROt_pos	60	0.372374	0.456097	0.540863	ASNMETPROt	Transport of AsnMetPro, Extracellular	Transport, extracellular
R_ASNN_pos	30	-0.615405	0.151941	0.214831	ASNN	L-asparaginase	Alanine and aspartate metabolism
R_ASNNm_pos	33	-0.433434	0.229864	0.307805	ASNNm	L-asparaginase (mitochondrial)	Alanine and aspartate metabolism
R_ASNPHEASPr_neg	42	-0.256922	0.602679	0.673269	ASNPHEASPr	Metabolism (Formation/Degradation) of AsnPheAsp	Peptide metabolism
R_ASNPHEASPr_pos	59	0.308728	0.502727	0.581969	ASNPHEASPr	Metabolism (Formation/Degradation) of AsnPheAsp	Peptide metabolism
R_ASNPHEASPt_neg	42	-0.256922	0.602679	0.673269	ASNPHEASPt	Transport of AsnPheAsp, Extracellular	Transport, extracellular
R_ASNPHEASPt_pos	59	0.308728	0.502727	0.581969	ASNPHEASPt	Transport of AsnPheAsp, Extracellular	Transport, extracellular
R_ASNPHECYSr_neg	50	-0.0133781	1	1	ASNPHECYSr	Metabolism (Formation/Degradation) of AsnPheCys	Peptide metabolism
R_ASNPHECYSr_pos	52	0.101516	0.881984	0.896311	ASNPHECYSr	Metabolism (Formation/Degradation) of AsnPheCys	Peptide metabolism
R_ASNPHECYSt_neg	50	-0.0133781	1	1	ASNPHECYSt	Transport of AsnPheCys, Extracellular	Transport, extracellular
R_ASNPHECYSt_pos	52	0.101516	0.881984	0.896311	ASNPHECYSt	Transport of AsnPheCys, Extracellular	Transport, extracellular
R_ASNPHELAT2tc_neg	23	-1.35655	0.0464515	0.0828554	ASNPHELAT2tc	Transport of L-Asparagine into the cell and efflux of L-Phenylalanine out of the cell by LAT2 on the basolateral surfaces of kidney and intestine and Amino Acid-Polyamine-Organocation (APC) TCDB:2.A.3.8.1	Transport, extracellular
R_ASNPHELAT2tc_pos	23	-1.34259	0.0464515	0.0828554	ASNPHELAT2tc	Transport of L-Asparagine into the cell and efflux of L-Phenylalanine out of the cell by LAT2 on the basolateral surfaces of kidney and intestine and Amino Acid-Polyamine-Organocation (APC) TCDB:2.A.3.8.1	Transport, extracellular
R_ASNS1_pos	31	-0.621877	0.175411	0.24229	ASNS1	Asparagine synthase (glutamine-hydrolysing)	Alanine and aspartate metabolism
R_ASNSERNaEx_pos	13	-1.55864	0.0042391	0.0222853	ASNSERNaEx	L-serine/L-asparagine Na-dependent exchange (Asn-L in)	Transport, extracellular
R_ASNTHRNaEx_pos	13	-1.58337	0.0042391	0.0222853	ASNTHRNaEx	L-threonine/L-asparagine Na-dependent exchange (Asn-L in)	Transport, extracellular
R_ASNTYRGLYr_neg	49	-0.0313751	1	1	ASNTYRGLYr	Metabolism (Formation/Degradation) of AsntyrGly	Peptide metabolism
R_ASNTYRGLYr_pos	62	0.400399	0.370219	0.45494	ASNTYRGLYr	Metabolism (Formation/Degradation) of AsntyrGly	Peptide metabolism
R_ASNTYRGLYt_neg	49	-0.0313751	1	1	ASNTYRGLYt	Transport of AsntyrGly, Extracellular	Transport, extracellular
R_ASNTYRGLYt_pos	62	0.400399	0.370219	0.45494	ASNTYRGLYt	Transport of AsntyrGly, Extracellular	Transport, extracellular
R_ASNTYRPHEr_neg	47	-0.0966757	0.881984	0.896311	ASNTYRPHEr	Metabolism (Formation/Degradation) of AsntyrPhe	Peptide metabolism
R_ASNTYRPHEr_pos	56	0.207754	0.655632	0.702434	ASNTYRPHEr	Metabolism (Formation/Degradation) of AsntyrPhe	Peptide metabolism
R_ASNTYRPHEt_neg	47	-0.0966757	0.881984	0.896311	ASNTYRPHEt	Transport of AsntyrPhe, Extracellular	Transport, extracellular
R_ASNTYRPHEt_pos	56	0.207754	0.655632	0.702434	ASNTYRPHEt	Transport of AsntyrPhe, Extracellular	Transport, extracellular
R_ASNTYRTHRr_neg	54	0.118993	0.766432	0.801003	ASNTYRTHRr	Metabolism (Formation/Degradation) of AsntyrThr	Peptide metabolism
R_ASNTYRTHRr_pos	52	0.101516	0.881984	0.896311	ASNTYRTHRr	Metabolism (Formation/Degradation) of AsntyrThr	Peptide metabolism
R_ASNTYRTHRt_neg	54	0.118993	0.766432	0.801003	ASNTYRTHRt	Transport of AsntyrThr, Extracellular	Transport, extracellular
R_ASNTYRTHRt_pos	52	0.101516	0.881984	0.896311	ASNTYRTHRt	Transport of AsntyrThr, Extracellular	Transport, extracellular
R_ASNt4_pos	34	-0.893335	0.260979	0.340299	ASNt4	L-asparagine transport in via sodium symport	Transport, extracellular
R_ASNtN1_neg	27	-1.15644	0.0951774	0.143538	ASNtN1	Asparagine transport (Na, H coupled)	Transport, extracellular
R_ASNtN1_pos	20	-1.31808	0.0250536	0.0536924	ASNtN1	Asparagine transport (Na, H coupled)	Transport, extracellular
R_ASNtm_pos	33	-0.433434	0.229864	0.307805	ASNtm	L-asparagine transport, mitochondrial	Transport, mitochondrial
R_ASP1DC_pos	57	0.505734	0.602679	0.673269	ASP1DC	Aspartate 1-decarboxylase	Beta-Alanine metabolism
R_ASPALAARGr_neg	57	0.641134	0.602679	0.673269	ASPALAARGr	Metabolism (Formation/Degradation) of AspAlaArg	Peptide metabolism
R_ASPALAARGr_pos	56	0.190925	0.655632	0.702434	ASPALAARGr	Metabolism (Formation/Degradation) of AspAlaArg	Peptide metabolism
R_ASPALAARGt_neg	57	0.641134	0.602679	0.673269	ASPALAARGt	Transport of AspAlaArg, Extracellular	Transport, extracellular
R_ASPALAARGt_pos	56	0.190925	0.655632	0.702434	ASPALAARGt	Transport of AspAlaArg, Extracellular	Transport, extracellular
R_ASPASNGLUr_neg	46	0.0717866	0.823756	0.850386	ASPASNGLUr	Metabolism (Formation/Degradation) of AspAsnGlu	Peptide metabolism
R_ASPASNGLUr_pos	61	0.324427	0.411896	0.496012	ASPASNGLUr	Metabolism (Formation/Degradation) of AspAsnGlu	Peptide metabolism
R_ASPASNGLUt_neg	46	0.0717866	0.823756	0.850386	ASPASNGLUt	Transport of AspAsnGlu, Extracellular	Transport, extracellular
R_ASPASNGLUt_pos	61	0.324427	0.411896	0.496012	ASPASNGLUt	Transport of AspAsnGlu, Extracellular	Transport, extracellular
R_ASPCT_neg	77	1.30443	0.0381281	0.0718944	ASPCT	Aspartate carbamoyltransferase	Pyrimidine synthesis
R_ASPCT_pos	75	0.963968	0.056192	0.0958446	ASPCT	Aspartate carbamoyltransferase	Pyrimidine synthesis
R_ASPDTDe_neg	73	0.978978	0.0804001	0.124359	ASPDTDe	D-aspartate transport, extracellular	Transport, extracellular
R_ASPDTDe_pos	22	-0.947962	0.0381281	0.0718944	ASPDTDe	D-aspartate transport, extracellular	Transport, extracellular
R_ASPDt6_pos	22	-0.947962	0.0381281	0.0718944	ASPDt6	D-aspartate transport via Na, H symport and K antiport	Transport, extracellular
R_ASPDxt_neg	82	1.14496	0.0124673	0.0352696	ASPDxt	D-aspartate transport, peroxisomal	Transport, peroxisomal
R_ASPGLUPROr_neg	59	0.625024	0.502727	0.581969	ASPGLUPROr	Metabolism (Formation/Degradation) of AspGluPro	Peptide metabolism
R_ASPGLUPROr_pos	56	0.242676	0.655632	0.702434	ASPGLUPROr	Metabolism (Formation/Degradation) of AspGluPro	Peptide metabolism
R_ASPGLUPROt_neg	59	0.625024	0.502727	0.581969	ASPGLUPROt	Transport of AspGluPro, Extracellular	Transport, extracellular
R_ASPGLUPROt_pos	56	0.242676	0.655632	0.702434	ASPGLUPROt	Transport of AspGluPro, Extracellular	Transport, extracellular
R_ASPGLUTRPr_neg	60	0.238643	0.456097	0.540863	ASPGLUTRPr	Metabolism (Formation/Degradation) of AspGluTrp	Peptide metabolism
R_ASPGLUTRPr_pos	56	0.164904	0.655632	0.702434	ASPGLUTRPr	Metabolism (Formation/Degradation) of AspGluTrp	Peptide metabolism
R_ASPGLUTRPt_neg	60	0.238643	0.456097	0.540863	ASPGLUTRPt	Transport of AspGluTrp, Extracellular	Transport, extracellular
R_ASPGLUTRPt_pos	56	0.164904	0.655632	0.702434	ASPGLUTRPt	Transport of AspGluTrp, Extracellular	Transport, extracellular
R_ASPGLUm_pos	64	0.696417	0.294725	0.375028	ASPGLUm	Aspartate-glutamate mitochondrial shuttle	Transport, mitochondrial
R_ASPGLUr_neg	54	0.340111	0.766432	0.801003	ASPGLUr	Metabolism (Formation/Degradation) of AspGlu	Peptide metabolism
R_ASPGLUr_pos	57	0.304183	0.602679	0.673269	ASPGLUr	Metabolism (Formation/Degradation) of AspGlu	Peptide metabolism
R_ASPGLUt_neg	54	0.340111	0.766432	0.801003	ASPGLUt	Transport of AspGlu, Extracellular	Transport, extracellular
R_ASPGLUt_pos	57	0.304183	0.602679	0.673269	ASPGLUt	Transport of AspGlu, Extracellular	Transport, extracellular
R_ASPHISCYSr_neg	56	0.226569	0.655632	0.702434	ASPHISCYSr	Metabolism (Formation/Degradation) of AspHisCys	Peptide metabolism
R_ASPHISCYSr_pos	56	0.21844	0.655632	0.702434	ASPHISCYSr	Metabolism (Formation/Degradation) of AspHisCys	Peptide metabolism
R_ASPHISCYSt_neg	56	0.226569	0.655632	0.702434	ASPHISCYSt	Transport of AspHisCys, Extracellular	Transport, extracellular
R_ASPHISCYSt_pos	56	0.21844	0.655632	0.702434	ASPHISCYSt	Transport of AspHisCys, Extracellular	Transport, extracellular
R_ASPHISPROr_neg	56	0.131519	0.655632	0.702434	ASPHISPROr	Metabolism (Formation/Degradation) of AspHisPro	Peptide metabolism
R_ASPHISPROr_pos	56	0.253864	0.655632	0.702434	ASPHISPROr	Metabolism (Formation/Degradation) of AspHisPro	Peptide metabolism
R_ASPHISPROt_neg	56	0.131519	0.655632	0.702434	ASPHISPROt	Transport of AspHisPro, Extracellular	Transport, extracellular
R_ASPHISPROt_pos	56	0.253864	0.655632	0.702434	ASPHISPROt	Transport of AspHisPro, Extracellular	Transport, extracellular
R_ASPLYSGLUr_neg	59	0.26731	0.502727	0.581969	ASPLYSGLUr	Metabolism (Formation/Degradation) of AspLysGlu	Peptide metabolism
R_ASPLYSGLUr_pos	56	0.242081	0.655632	0.702434	ASPLYSGLUr	Metabolism (Formation/Degradation) of AspLysGlu	Peptide metabolism
R_ASPLYSGLUt_neg	59	0.26731	0.502727	0.581969	ASPLYSGLUt	Transport of AspLysGlu, Extracellular	Transport, extracellular
R_ASPLYSGLUt_pos	56	0.242081	0.655632	0.702434	ASPLYSGLUt	Transport of AspLysGlu, Extracellular	Transport, extracellular
R_ASPLYSHISr_neg	53	0.117711	0.823756	0.850386	ASPLYSHISr	Metabolism (Formation/Degradation) of AspLysHis	Peptide metabolism
R_ASPLYSHISr_pos	56	0.242081	0.655632	0.702434	ASPLYSHISr	Metabolism (Formation/Degradation) of AspLysHis	Peptide metabolism
R_ASPLYSHISt_neg	53	0.117711	0.823756	0.850386	ASPLYSHISt	Transport of AspLysHis, Extracellular	Transport, extracellular
R_ASPLYSHISt_pos	56	0.242081	0.655632	0.702434	ASPLYSHISt	Transport of AspLysHis, Extracellular	Transport, extracellular
R_ASPMETASPr_neg	58	0.165101	0.551631	0.629058	ASPMETASPr	Metabolism (Formation/Degradation) of AspMetAsp	Peptide metabolism
R_ASPMETASPr_pos	65	0.489605	0.260979	0.340299	ASPMETASPr	Metabolism (Formation/Degradation) of AspMetAsp	Peptide metabolism
R_ASPMETASPt_neg	58	0.165101	0.551631	0.629058	ASPMETASPt	Transport of AspMetAsp, Extracellular	Transport, extracellular
R_ASPMETASPt_pos	65	0.489605	0.260979	0.340299	ASPMETASPt	Transport of AspMetAsp, Extracellular	Transport, extracellular
R_ASPNATm_pos	82	1.28937	0.0124673	0.0352696	ASPNATm	Aspartate N-acetyltransferase, mitochondrial	Alanine and aspartate metabolism
R_ASPPROASCT1_pos	13	-1.35803	0.0042391	0.0222853	ASPPROASCT1	Aspartate intake by system ASCT-1 transporter	Transport, extracellular
R_ASPPROLYSr_neg	57	0.131785	0.602679	0.673269	ASPPROLYSr	Metabolism (Formation/Degradation) of AspProLys	Peptide metabolism
R_ASPPROLYSr_pos	56	0.242081	0.655632	0.702434	ASPPROLYSr	Metabolism (Formation/Degradation) of AspProLys	Peptide metabolism
R_ASPPROLYSt_neg	57	0.131785	0.602679	0.673269	ASPPROLYSt	Transport of AspProLys, Extracellular	Transport, extracellular
R_ASPPROLYSt_pos	56	0.242081	0.655632	0.702434	ASPPROLYSt	Transport of AspProLys, Extracellular	Transport, extracellular
R_ASPTA_neg	52	0.183852	0.881984	0.896311	ASPTA	Aspartate transaminase	Alanine and aspartate metabolism
R_ASPTA_pos	64	0.697516	0.294725	0.375028	ASPTA	Aspartate transaminase	Alanine and aspartate metabolism
R_ASPTAm_neg	64	0.690732	0.294725	0.375028	ASPTAm	Aspartate transaminase	Alanine and aspartate metabolism
R_ASPTAm_pos	46	-0.0683415	0.823756	0.850386	ASPTAm	Aspartate transaminase	Alanine and aspartate metabolism
R_ASPT_pos	38	-0.557765	0.411896	0.496012	ASPT	L-aspartase	Glutamate metabolism
R_ASPVALASNr_neg	50	0.0469455	1	1	ASPVALASNr	Metabolism (Formation/Degradation) of AspValAsn	Peptide metabolism
R_ASPVALASNr_pos	62	0.400399	0.370219	0.45494	ASPVALASNr	Metabolism (Formation/Degradation) of AspValAsn	Peptide metabolism
R_ASPVALASNt_neg	50	0.0469455	1	1	ASPVALASNt	Transport of AspValAsn, Extracellular	Transport, extracellular
R_ASPVALASNt_pos	62	0.400399	0.370219	0.45494	ASPVALASNt	Transport of AspValAsn, Extracellular	Transport, extracellular
R_ASPt6_pos	22	-0.947962	0.0381281	0.0718944	ASPt6	L-aspartate transport via Na, H symport and K antiport	Transport, extracellular
R_ASPte_pos	80	1.39461	0.0200405	0.0465357	ASPte	Diffusion of aspartate into blood	Transport, extracellular
R_ATP1ter_pos	91	1.75308	0.000797809	0.0123231	ATP1ter	ADP/ATP transporter, endoplasmic reticulum	Transport, endoplasmic reticular
R_ATP2ter_pos	96	2.33745	8.33532e-05	0.00769926	ATP2ter	AMP/ATP transporter, endoplasmic reticulum	Transport, endoplasmic reticular
R_ATPH1e_pos	39	-0.296624	0.456097	0.540863	ATPH1e	ATP diphosphohydrolase	Nucleotide interconversion
R_ATPH2e_pos	24	-0.968415	0.056192	0.0958446	ATPH2e	ATP diphosphohydrolase	Nucleotide interconversion
R_ATPM_pos	89	1.75693	0.00164325	0.0139691	ATPM	ATP maintenance requirement	Biomass and maintenance functions
R_ATPS4mi_pos	69	0.777135	0.151941	0.214831	ATPS4mi	ATP synthase (four protons for one ATP)	Oxidative phosphorylation
R_ATPasel_1_pos	85	1.43849	0.00565611	0.0245801	ATPasel_1	V-Type ATPase, H+ Transporting, Lysosomal	Transport, lysosomal
R_ATPtg_pos	87	1.46014	0.00314361	0.0195418	ATPtg	ADP/ATP Transporter, Golgi	Transport, golgi apparatus
R_ATPtm_pos	44	-0.0152183	0.7103	0.749568	ATPtm	ADP/ATP transporter, mitochondrial	Transport, mitochondrial
R_ATPtn_pos	84	1.402	0.00744225	0.0264329	ATPtn	ATP diffusion in nucleus	Transport, nuclear
R_ATPtx_neg	74	1.29933	0.0674446	0.109256	ATPtx	ATP transporter, peroxisomal	Transport, peroxisomal
R_ATPtx_pos	74	1.29933	0.0674446	0.109256	ATPtx	ATP transporter, peroxisomal	Transport, peroxisomal
R_ATVACIDMCTtu_neg	47	0.0165703	0.881984	0.896311	ATVACIDMCTtu	Uptake of atorvastatin by enterocytes by MCT1	Drug metabolism
R_ATVACIDMCTtu_pos	48	-0.0966674	0.940843	0.950233	ATVACIDMCTtu	Uptake of atorvastatin by enterocytes by MCT1	Drug metabolism
R_ATVACIDOATPtu_neg	48	-0.0966674	0.940843	0.950233	ATVACIDOATPtu	Uptake of atorvastatin by enterocytes	Drug metabolism
R_ATVACIDOATPtu_pos	47	0.0165703	0.881984	0.896311	ATVACIDOATPtu	Uptake of atorvastatin by enterocytes	Drug metabolism
R_ATVACIDhc_pos	75	1.24197	0.056192	0.0958446	ATVACIDhc	Conversion of lactone to acid form of atorvastatin in hepatocytes	Drug metabolism
R_ATVACIDhr_pos	86	1.52948	0.0042391	0.0222853	ATVACIDhr	Spontaneous conversion of atorvastatin ether glucuronide (G1) to atorvastatin-acid	Drug metabolism
R_ATVACIDitr_pos	87	1.67507	0.00314361	0.0195418	ATVACIDitr	ATVACIDitr	Drug metabolism
R_ATVACIDtdu_neg	99	1.64842	1.19076e-05	0.00431274	ATVACIDtdu	Passive diffusion of atorvastatin into enterocytes	Drug metabolism
R_ATVACIDtdu_pos	97	1.52539	4.76304e-05	0.00769926	ATVACIDtdu	Passive diffusion of atorvastatin into enterocytes	Drug metabolism
R_ATVACIDtu_pos	90	1.82491	0.00115504	0.0123231	ATVACIDtu	Efflux of atorvastatin acid by P-gp from the enterocytes into lumen	Drug metabolism
R_ATVACYLGLUChc_pos	87	1.67507	0.00314361	0.0195418	ATVACYLGLUChc	Glucuronidation of atorvastatin to atorvastatin acyl glucuronide (G2) in hepatocytes	Drug metabolism
R_ATVETHGLUChc_pos	86	1.52948	0.0042391	0.0222853	ATVETHGLUChc	Glucuronidation of atorvastatin to atorvastatin ether glucuronide (G1) in hepatocytes	Drug metabolism
R_ATVLACGLCURhc_pos	86	1.61901	0.0042391	0.0222853	ATVLACGLCURhc	Glucuronidation of atorvastatin lactone to atorvastain lactone ether glucuronide (G3) in hepatocytes	Drug metabolism
R_ATVLACThc_neg	97	1.52539	4.76304e-05	0.00769926	ATVLACThc	Uptake of atorvastatin-lactone into hepatocytes	Drug metabolism
R_ATVLACThc_pos	99	1.64842	1.19076e-05	0.00431274	ATVLACThc	Uptake of atorvastatin-lactone into hepatocytes	Drug metabolism
R_ATVLACh2r_pos	87	1.67507	0.00314361	0.0195418	ATVLACh2r	Spontaneous conversion of glucuronide (G2) to lactone form of atorvastatin	Drug metabolism
R_ATVLAChc_pos	75	1.23823	0.056192	0.0958446	ATVLAChc	Lactonization of atorvastatin in hepatocytes	Drug metabolism
R_ATVLAChr_pos	86	1.61901	0.0042391	0.0222853	ATVLAChr	Spontaneous conversion of atorvastain lactone ether glucuronide (G3) to atorvastatin-lactone in hepatocytes	Drug metabolism
R_ATVLACitr_neg	87	1.67507	0.00314361	0.0195418	ATVLACitr	ATVLACitr	Drug metabolism
R_ATVLACitr_pos	83	1.50899	0.00969278	0.0304849	ATVLACitr	ATVLACitr	Drug metabolism
R_ATVLACtdhc_neg	99	1.64842	1.19076e-05	0.00431274	ATVLACtdhc	Passive diffusion of atorvastatin lactone into hepatocytes	Drug metabolism
R_ATVLACtdhc_pos	97	1.52539	4.76304e-05	0.00769926	ATVLACtdhc	Passive diffusion of atorvastatin lactone into hepatocytes	Drug metabolism
R_ATVLACtu_pos	90	1.82487	0.00115504	0.0123231	ATVLACtu	Efflux of atorvastatin lactone by P-gp from the enterocytes into lumen	Drug metabolism
R_AVITE1t_pos	61	0.170394	0.411896	0.496012	AVITE1t	Alpha-Tocopherol (Vit. E) transport	Transport, extracellular
R_A_MANASEly_pos	77	1.1545	0.0381281	0.0718944	A_MANASEly	Alpha-mannosidase, lysosomal	N-glycan degradation
R_Am19CStev_neg	90	1.69497	0.00115504	0.0123231	Am19CStev	Efflux of AM19-cyclosporine into hepatic vein	Drug metabolism
R_Am19CStev_pos	79	1.36935	0.0250536	0.0536924	Am19CStev	Efflux of AM19-cyclosporine into hepatic vein	Drug metabolism
R_Am1CSAteb_pos	90	1.69497	0.00115504	0.0123231	Am1CSAteb	Efflux of AM1-cyclosporine into bile	Drug metabolism
R_B3GALT3g_pos	85	1.58244	0.00565611	0.0245801	B3GALT3g	Beta-1,3-galactosyltransferase 3	Sphingolipid metabolism
R_B3GALT41g_pos	76	1.22741	0.0464515	0.0828554	B3GALT41g	Beta-1,3-galactosyltransferase 4	Sphingolipid metabolism
R_B3GALT42g_pos	74	1.21131	0.0674446	0.109256	B3GALT42g	Beta-1,3-galactosyltransferase 4	Sphingolipid metabolism
R_B3GALT43g_pos	74	1.19029	0.0674446	0.109256	B3GALT43g	Beta-1,3-galactosyltransferase 4	Sphingolipid metabolism
R_B3GALT44g_pos	77	1.22852	0.0381281	0.0718944	B3GALT44g	Beta-1,3-galactosyltransferase 4	Sphingolipid metabolism
R_B3GALT5g_pos	74	0.967671	0.0674446	0.109256	B3GALT5g	Beta-1,3-galactosyltransferase 5	Sphingolipid metabolism
R_B3GALTg_pos	74	0.922983	0.0674446	0.109256	B3GALTg	Beta galactosyltransferase	Blood group synthesis
R_B3GNT11g_pos	78	1.24327	0.0310312	0.0617975	B3GNT11g	UDP-GlcNAc:betaGal beta-1,3-N-acetylglucosaminyltransferase 1	Blood group synthesis
R_B3GNT12g_pos	80	1.23388	0.0200405	0.0465357	B3GNT12g	UDP-GlcNAc:betaGal beta-1,3-N-acetylglucosaminyltransferase 1	Blood group synthesis
R_B3GNT310g_pos	81	1.29537	0.0158966	0.0405158	B3GNT310g	UDP-GlcNAc:betaGal beta-1,3-N-acetylglucosaminyltransferase 3, Golgi apparatus	Blood group synthesis
R_B3GNT311g_pos	73	0.929177	0.0804001	0.124359	B3GNT311g	UDP-GlcNAc:betaGal beta-1,3-N-acetylglucosaminyltransferase 3, Golgi apparatus	Blood group synthesis
R_B3GNT312g_pos	78	1.24327	0.0310312	0.0617975	B3GNT312g	UDP-GlcNAc:betaGal beta-1,3-N-acetylglucosaminyltransferase 3, Golgi apparatus	Blood group synthesis
R_B3GNT313g_pos	75	1.00344	0.056192	0.0958446	B3GNT313g	UDP-GlcNAc:betaGal beta-1,3-N-acetylglucosaminyltransferase 3, Golgi apparatus	Blood group synthesis
R_B3GNT314g_pos	74	1.08287	0.0674446	0.109256	B3GNT314g	UDP-GlcNAc:betaGal beta-1,3-N-acetylglucosaminyltransferase 3, Golgi apparatus	Blood group synthesis
R_B3GNT315g_pos	80	1.23388	0.0200405	0.0465357	B3GNT315g	UDP-GlcNAc:betaGal beta-1,3-N-acetylglucosaminyltransferase 3, Golgi apparatus	Blood group synthesis
R_B3GNT31g_pos	79	1.22855	0.0250536	0.0536924	B3GNT31g	UDP-GlcNAc:betaGal beta-1,3-N-acetylglucosaminyltransferase 3, Golgi apparatus	Sphingolipid metabolism
R_B3GNT32g_pos	79	1.22855	0.0250536	0.0536924	B3GNT32g	UDP-GlcNAc:betaGal beta-1,3-N-acetylglucosaminyltransferase 3, Golgi apparatus	Sphingolipid metabolism
R_B3GNT33g_pos	79	1.22855	0.0250536	0.0536924	B3GNT33g	UDP-GlcNAc:betaGal beta-1,3-N-acetylglucosaminyltransferase 3, Golgi apparatus	Sphingolipid metabolism
R_B3GNT34g_pos	79	1.25235	0.0250536	0.0536924	B3GNT34g	UDP-GlcNAc:betaGal beta-1,3-N-acetylglucosaminyltransferase 3, Golgi apparatus	Sphingolipid metabolism
R_B3GNT35g_pos	79	1.25235	0.0250536	0.0536924	B3GNT35g	UDP-GlcNAc:betaGal beta-1,3-N-acetylglucosaminyltransferase 3, Golgi apparatus	Sphingolipid metabolism
R_B3GNT36g_pos	85	1.58244	0.00565611	0.0245801	B3GNT36g	UDP-GlcNAc:betaGal beta-1,3-N-acetylglucosaminyltransferase 3, Golgi apparatus	Sphingolipid metabolism
R_B3GNT37g_pos	74	1.04427	0.0674446	0.109256	B3GNT37g	UDP-GlcNAc:betaGal beta-1,3-N-acetylglucosaminyltransferase 3, Golgi apparatus	Sphingolipid metabolism
R_B3GNT38g_pos	84	1.58181	0.00744225	0.0264329	B3GNT38g	UDP-GlcNAc:betaGal beta-1,3-N-acetylglucosaminyltransferase 3, Golgi apparatus	Glycosphingolipid metabolism
R_B3GNT39g_pos	81	1.41443	0.0158966	0.0405158	B3GNT39g	UDP-GlcNAc:betaGal beta-1,3-N-acetylglucosaminyltransferase 3, Golgi apparatus	Sphingolipid metabolism
R_B3GNT51g_pos	81	1.29537	0.0158966	0.0405158	B3GNT51g	UDP-GlcNAc:betaGal beta-1,3-N-acetylglucosaminyltransferase 5	Blood group synthesis
R_BAAT1x_pos	75	1.32238	0.056192	0.0958446	BAAT1x	Bile acid Coenzyme A: amino acid N-acyltransferase	Bile acid synthesis
R_BAAT2x_pos	67	0.690213	0.201369	0.273076	BAAT2x	Bile acid Coenzyme A: amino acid N-acyltransferase	Bile acid synthesis
R_BAAT3x_pos	82	1.43245	0.0124673	0.0352696	BAAT3x	Bile acid Coenzyme A: amino acid N-acyltransferase	Bile acid synthesis
R_BAAT4x_cho_pos	75	1.32238	0.056192	0.0958446	BAAT4x_cho	Bile acid Coenzyme A: amino acid N-acyltransferase	Bile acid synthesis
R_BAAT5x_neg	76	1.24284	0.0464515	0.0828554	BAAT5x	Bile acid Coenzyme A: amino acid N-acyltransferase	Bile acid synthesis
R_BAAT5x_pos	67	0.690213	0.201369	0.273076	BAAT5x	Bile acid Coenzyme A: amino acid N-acyltransferase	Bile acid synthesis
R_BACCL_pos	67	0.668099	0.201369	0.273076	BACCL	Biotin acetyl CoA carboxylase ligase	Biotin metabolism
R_BACCLm_pos	62	0.506459	0.370219	0.45494	BACCLm	Biotin-[acetyl-CoA-carboxylase] ligase, mitochondrial	Biotin metabolism
R_BALABETAtc2_neg	81	1.51164	0.0158966	0.0405158	BALABETAtc2	Transport of 3-Ureidopropionate	Transport, extracellular
R_BALABETAtc2_pos	81	1.51164	0.0158966	0.0405158	BALABETAtc2	Transport of 3-Ureidopropionate	Transport, extracellular
R_BALABETAtc_pos	19	-1.16101	0.0200405	0.0465357	BALABETAtc	Transport of beta alanine into the intestinal cells by beta transport system	Transport, extracellular
R_BALAPAT1tc2_neg	86	1.22435	0.0042391	0.0222853	BALAPAT1tc2	Transport of 3-Ureidopropionate	Transport, extracellular
R_BALAPAT1tc2_pos	70	0.742632	0.130805	0.189642	BALAPAT1tc2	Transport of 3-Ureidopropionate	Transport, extracellular
R_BALAVECSEC_1_pos	44	-0.345726	0.7103	0.749568	BALAVECSEC_1	B-Alanine Secretion via Secretory Vesicle (ATP Driven)	Transport, extracellular
R_BALAt2r_pos	44	-0.526205	0.7103	0.749568	BALAt2r	Beta Alanine transport in via proton symport	Transport, extracellular
R_BALAtmr_neg	61	0.523164	0.411896	0.496012	BALAtmr	Beta-alanine transport, mitochondria	Transport, mitochondrial
R_BALAtmr_pos	60	0.41049	0.456097	0.540863	BALAtmr	Beta-alanine transport, mitochondria	Transport, mitochondrial
R_BAMPPALDOX_pos	83	1.35275	0.00969278	0.0304849	BAMPPALDOX	Beta-Aminopropion aldehyde NAD+ oxidoreductase	Beta-Alanine metabolism
R_BBHOX_pos	85	1.51772	0.00565611	0.0245801	BBHOX	4-Trimethylammoniobutanoate,2-oxoglutarate:oxygen oxidoreductase (3-hydroxylating)	Lysine metabolism
R_BCDO_pos	81	1.37014	0.0158966	0.0405158	BCDO	Beta-Carotene dioxygenase	Vitamin A metabolism
R_BCRNe_pos	84	1.50485	0.00744225	0.0264329	BCRNe	Transport of 3-hydroxy butyryl carnitine into extra cellular space	Fatty acid oxidation
R_BDHm_neg	84	1.44759	0.00744225	0.0264329	BDHm	3-Hydroxybutanoate:NAD+ oxidoreductase, mitochondria	Butanoate metabolism
R_BDHm_pos	83	1.49668	0.00969278	0.0304849	BDHm	3-Hydroxybutanoate:NAD+ oxidoreductase, mitochondria	Butanoate metabolism
R_BETALDHx_neg	31	-1.1661	0.175411	0.24229	BETALDHx	Betaine-aldehyde dehydrogenase	Glycine, serine, alanine, and threonine metabolism
R_BETALDHx_pos	15	-1.11689	0.00744225	0.0264329	BETALDHx	Betaine-aldehyde dehydrogenase	Glycine, serine, alanine, and threonine metabolism
R_BETALDHxm_pos	81	1.31782	0.0158966	0.0405158	BETALDHxm	Betaine-aldehyde dehydrogenase, mitochondrial	Glycine, serine, alanine, and threonine metabolism
R_BETALDHy_neg	15	-1.11689	0.00744225	0.0264329	BETALDHy	Betaine-aldehyde dehydrogenase	Glycine, serine, alanine, and threonine metabolism
R_BETALDHy_pos	31	-1.1661	0.175411	0.24229	BETALDHy	Betaine-aldehyde dehydrogenase	Glycine, serine, alanine, and threonine metabolism
R_BETBGTtc_neg	34	-0.983405	0.260979	0.340299	BETBGTtc	Betaine Transport by Bgt	Transport, extracellular
R_BETBGTtc_pos	34	-1.01911	0.260979	0.340299	BETBGTtc	Betaine Transport by Bgt	Transport, extracellular
R_BGAL1e_pos	80	1.49736	0.0200405	0.0465357	BGAL1e	Beta-Galactosidase, Plasma Membrane	Sphingolipid metabolism
R_BGAL1l_pos	83	1.51645	0.00969278	0.0304849	BGAL1l	Beta-Galactosidase, Lysosomal	Sphingolipid metabolism
R_BGAL2l_pos	83	1.46398	0.00969278	0.0304849	BGAL2l	Beta-Galactosidase, Lysosomal	Sphingolipid metabolism
R_BGAL3l_pos	84	1.47417	0.00744225	0.0264329	BGAL3l	Beta-Galactosidase, Lysosomal	Sphingolipid metabolism
R_BGLYFm_pos	81	1.42051	0.0158966	0.0405158	BGLYFm	Hippurate (Benzoylglycinate) Formation	Hippurate metabolism
R_BGLYte_pos	81	1.42051	0.0158966	0.0405158	BGLYte	Transport of Hippurate (Benzoylglycine), Extracellular	Transport, extracellular
R_BGLYtm_pos	81	1.42051	0.0158966	0.0405158	BGLYtm	Intracellular Transport for Benzoyl-Glycine	Transport, mitochondrial
R_BHBt_neg	82	1.49189	0.0124673	0.0352696	BHBt	(R)-3-Hydroxybutanoate transport via H+ symport	Transport, extracellular
R_BHBt_pos	82	1.49189	0.0124673	0.0352696	BHBt	(R)-3-Hydroxybutanoate transport via H+ symport	Transport, extracellular
R_BHBtm_neg	84	1.44759	0.00744225	0.0264329	BHBtm	(R)-3-Hydroxybutanoate mitochondrial transport via H+ symport	Transport, mitochondrial
R_BHBtm_pos	83	1.49668	0.00969278	0.0304849	BHBtm	(R)-3-Hydroxybutanoate mitochondrial transport via H+ symport	Transport, mitochondrial
R_BHMT_pos	37	-0.288012	0.370219	0.45494	BHMT	Betaine-homocysteine S-methyltransferase	Glycine, serine, alanine, and threonine metabolism
R_BIDGLCURr_pos	83	1.35971	0.00969278	0.0304849	BIDGLCURr	Bilirubin Di-Glucuronide Production	Heme degradation
R_BILDGLCURt_neg	69	0.977943	0.151941	0.214831	BILDGLCURt	Bilirubin beta-diglucuronide transport via bicarbonate countertransport	Transport, extracellular
R_BILDGLCURt_pos	69	0.974565	0.151941	0.214831	BILDGLCURt	Bilirubin beta-diglucuronide transport via bicarbonate countertransport	Transport, extracellular
R_BILDGLCURte_pos	83	1.43236	0.00969278	0.0304849	BILDGLCURte	Bilirubin beta-diglucuronide transport MDR	Transport, extracellular
R_BILDGLCURtr_neg	83	1.35971	0.00969278	0.0304849	BILDGLCURtr	Glucuronidated compound transport	Transport, endoplasmic reticular
R_BILDGLCURtr_pos	69	0.669568	0.151941	0.214831	BILDGLCURtr	Glucuronidated compound transport	Transport, endoplasmic reticular
R_BILGLCURt_neg	77	0.892539	0.0381281	0.0718944	BILGLCURt	Bilirubin monoglucuronide transport via bicarbonate countertransport	Transport, extracellular
R_BILGLCURt_pos	78	0.870531	0.0310312	0.0617975	BILGLCURt	Bilirubin monoglucuronide transport via bicarbonate countertransport	Transport, extracellular
R_BILGLCURte_pos	34	-0.661052	0.260979	0.340299	BILGLCURte	Bilirubin monoglucuronide transport MDR	Transport, extracellular
R_BILGLCURtr_neg	86	1.628	0.0042391	0.0222853	BILGLCURtr	Glucuronidated compound transport	Transport, endoplasmic reticular
R_BILGLCURtr_pos	92	1.74145	0.000535842	0.0116505	BILGLCURtr	Glucuronidated compound transport	Transport, endoplasmic reticular
R_BILIRED2_pos	69	0.824528	0.151941	0.214831	BILIRED2	Nadh biliverdin reductase	Heme synthesis
R_BILIRED_pos	73	0.985558	0.0804001	0.124359	BILIRED	Nad(p)h biliverdin reductase	Heme degradation
R_BILIRUBt2_neg	83	1.11638	0.00969278	0.0304849	BILIRUBt2	Bilirubin transport via bicarbonate countertransport	Transport, extracellular
R_BILIRUBt2_pos	83	1.32229	0.00969278	0.0304849	BILIRUBt2	Bilirubin transport via bicarbonate countertransport	Transport, extracellular
R_BILIRUBtr_neg	83	1.51715	0.00969278	0.0304849	BILIRUBtr	Lipid, flip-flop intracellular transport	Transport, endoplasmic reticular
R_BILIRUBtr_pos	83	1.51715	0.00969278	0.0304849	BILIRUBtr	Lipid, flip-flop intracellular transport	Transport, endoplasmic reticular
R_BILIVERDt_neg	78	1.34248	0.0310312	0.0617975	BILIVERDt	Transport of Biliverdin	Transport, extracellular
R_BILIVERDt_pos	76	1.0922	0.0464515	0.0828554	BILIVERDt	Transport of Biliverdin	Transport, extracellular
R_BIOCYTtn_pos	81	1.3623	0.0158966	0.0405158	BIOCYTtn	Biocytin transport, nuclear	Transport, nuclear
R_BIOMASS_maintenance_noTrTr_pos	66	0.529601	0.229864	0.307805	BIOMASS_maintenance_noTrTr	Biomass maintenance reaction without replication, transcription, and translation precursors	Biomass and maintenance functions
R_BIOMASS_maintenance_pos	83	1.36747	0.00969278	0.0304849	BIOMASS_maintenance	Biomass maintenance reaction without replication precursors	Biomass and maintenance functions
R_BIOMASS_reaction_pos	83	1.35032	0.00969278	0.0304849	BIOMASS_reaction	Generic Human Biomass Reaction	Biomass and maintenance functions
R_BMTer_U_pos	84	1.2925	0.00744225	0.0264329	BMTer_U	B mannosyltransferase, endoplasmic reticulum	Phosphatidylinositol phosphate metabolism
R_BPNT2_pos	63	0.615383	0.331162	0.414457	BPNT2	3-Phospho-5-adenylyl sulfate 3-phosphohydrolase	Nucleotide interconversion
R_BPNT_pos	59	0.488064	0.502727	0.581969	BPNT	3,5-bisphosphate nucleotidase	Nucleotide interconversion
R_BTND1_pos	67	0.668099	0.201369	0.273076	BTND1	Biotinidase (biotin)	Biotin metabolism
R_BTND1n_pos	81	1.3623	0.0158966	0.0405158	BTND1n	Biotinidase (biotin), nuclear	Biotin metabolism
R_BTNDe_pos	80	1.28053	0.0200405	0.0465357	BTNDe	Biotinidase (biotin), extracellular	Biotin metabolism
R_BTNDm_pos	62	0.506459	0.370219	0.45494	BTNDm	Biotinidase (biotin), mitochondrial	Biotin metabolism
R_BTNPL_pos	67	0.668099	0.201369	0.273076	BTNPL	Holocarboxylase synthestase (biotin protein ligase)	Biotin metabolism
R_BTNPLm_pos	62	0.506459	0.370219	0.45494	BTNPLm	Holocarboxylase synthestase (biotin protein ligase), mitochondrial	Biotin metabolism
R_BTNTe_pos	87	1.71351	0.00314361	0.0195418	BTNTe	Release of biotin across the basolatral membrane	Transport, extracellular
R_BTNt2i_neg	24	-1.28064	0.056192	0.0958446	BTNt2i	Biotin uptake	Transport, extracellular
R_BTNt2i_pos	87	1.71351	0.00314361	0.0195418	BTNt2i	Biotin uptake	Transport, extracellular
R_BTNt2m_pos	87	1.51336	0.00314361	0.0195418	BTNt2m	Biotin reversible transport via proton symport, mitochondria	Transport, mitochondrial
R_BTNt3i_1_pos	59	0.350523	0.502727	0.581969	BTNt3i_1	Biotin Transport via Sodium Symport	Transport, extracellular
R_BTNt3i_pos	53	0.0757338	0.823756	0.850386	BTNt3i	Biotin transport via sodium symport	Transport, extracellular
R_BTNt4i_pos	56	-0.000733293	0.655632	0.702434	BTNt4i	Biotin uptake (antiport)	Transport, extracellular
R_BTNtn_neg	81	1.3623	0.0158966	0.0405158	BTNtn	Biotin transport, nuclear	Transport, nuclear
R_BTNtn_pos	78	1.46176	0.0310312	0.0617975	BTNtn	Biotin transport, nuclear	Transport, nuclear
R_BUP2_pos	39	-0.257035	0.456097	0.540863	BUP2	Beta-ureidopropionase (D-3-amino-isobutanoate forming)	Pyrimidine catabolism
R_BUTSMCT1_neg	81	1.37993	0.0158966	0.0405158	BUTSMCT1	Butyrate Transport by Smct1	Transport, extracellular
R_BUTSMCT1_pos	81	1.37993	0.0158966	0.0405158	BUTSMCT1	Butyrate Transport by Smct1	Transport, extracellular
R_BUTt2m_pos	83	1.55563	0.00969278	0.0304849	BUTt2m	Butyrate mitochondrial transport via proton symport, reversible	Transport, mitochondrial
R_BUTt2r_neg	75	1.1264	0.056192	0.0958446	BUTt2r	Butyrate transport via proton symport, reversible	Transport, extracellular
R_BUTt2r_pos	75	1.1264	0.056192	0.0958446	BUTt2r	Butyrate transport via proton symport, reversible	Transport, extracellular
R_BUTt_neg	37	-0.59568	0.370219	0.45494	BUTt	Butyrate transport (diffusion)	Transport, extracellular
R_BUTt_pos	37	-0.622944	0.370219	0.45494	BUTt	Butyrate transport (diffusion)	Transport, extracellular
R_BZCOAFm_pos	81	1.42051	0.0158966	0.0405158	BZCOAFm	Benzoyl Coenzyme A Formation	Hippurate metabolism
R_BZt_neg	78	1.38009	0.0310312	0.0617975	BZt	Benzoate transport (diffusion)	Transport, extracellular
R_BZt_pos	80	1.39375	0.0200405	0.0465357	BZt	Benzoate transport (diffusion)	Transport, extracellular
R_BZtm_pos	81	1.42051	0.0158966	0.0405158	BZtm	Intracellular Transport of Benzoate	Transport, mitochondrial
R_BZtr_neg	75	1.32755	0.056192	0.0958446	BZtr	Benzene transporter, endoplasmic reticulum	Transport, endoplasmic reticular
R_B_MANNASEly_pos	77	1.1545	0.0381281	0.0718944	B_MANNASEly	Beta-mannosidase, lysosomal	N-glycan degradation
R_C02356t_neg	78	1.29918	0.0310312	0.0617975	C02356t	(S)-2-Aminobutanoate	Transport, extracellular
R_C02356t_pos	87	1.61593	0.00314361	0.0195418	C02356t	(S)-2-Aminobutanoate	Transport, extracellular
R_C02592tx_neg	81	1.22503	0.0158966	0.0405158	C02592tx	Transprot of Taurolithocholate, Peroxisomal	Transport, peroxisomal
R_C02712te_neg	69	0.575874	0.151941	0.214831	C02712te	Transport of N-Acetylmethionine, Extracellular	Transport, extracellular
R_C02712te_pos	39	-0.395197	0.456097	0.540863	C02712te	Transport of N-Acetylmethionine, Extracellular	Transport, extracellular
R_C02712tm_neg	86	1.48419	0.0042391	0.0222853	C02712tm	Transport of N-Acetylmethionine, Intracellular	Transport, mitochondrial
R_C03681te_pos	79	1.27134	0.0250536	0.0536924	C03681te	Transport of 5Alpha-Pregnane-3, 20-Dione, Extracellular	Transport, extracellular
R_C03990ATP_pos	84	1.32565	0.00744225	0.0264329	C03990ATP	Transport of Lithocholate, Active Transport	Transport, extracellular
R_C03990t_neg	92	1.49889	0.000535842	0.0116505	C03990t	Transport of Lithocholate, Sodium Symport	Transport, extracellular
R_C03990t_pos	92	1.49889	0.000535842	0.0116505	C03990t	Transport of Lithocholate, Sodium Symport	Transport, extracellular
R_C03990tr_neg	77	1.30278	0.0381281	0.0718944	C03990tr	Transport of Lithocholate, Intracellular	Transport, endoplasmic reticular
R_C03990tx_neg	81	1.22503	0.0158966	0.0405158	C03990tx	Transport of Lithocholate, Intracellular	Transport, peroxisomal
R_C04483t1_pos	90	1.84719	0.00115504	0.0123231	C04483t1	Transport of Deoxycholate	Transport, extracellular
R_C04483t2_neg	91	1.84699	0.000797809	0.0123231	C04483t2	Transport of Deoxycholate, Antiport with Bicarbonate	Transport, extracellular
R_C04483t2_pos	83	1.36283	0.00969278	0.0304849	C04483t2	Transport of Deoxycholate, Antiport with Bicarbonate	Transport, extracellular
R_C04717ATP_pos	90	1.69497	0.00115504	0.0123231	C04717ATP	Transport of 13(S)-HPODE, Active	Transport, extracellular
R_C04717td_neg	90	1.69497	0.00115504	0.0123231	C04717td	Transport of 13(S)-HPODE, Diffusion	Transport, extracellular
R_C04717td_pos	71	1.00675	0.111943	0.166021	C04717td	Transport of 13(S)-HPODE, Diffusion	Transport, extracellular
R_C04805ATP_pos	90	1.6945	0.00115504	0.0123231	C04805ATP	Transport of 5(S)-HETE, Active Transport	Transport, extracellular
R_C04805td_neg	90	1.69538	0.00115504	0.0123231	C04805td	Transport of 5(S)-HETE, Diffusion	Transport, extracellular
R_C04805td_pos	77	1.22684	0.0381281	0.0718944	C04805td	Transport of 5(S)-HETE, Diffusion	Transport, extracellular
R_C05298te_pos	79	1.26099	0.0250536	0.0536924	C05298te	Transport of 2-Hydroxyestrone, Extracellular	Transport, extracellular
R_C05299te_pos	79	1.25697	0.0250536	0.0536924	C05299te	Transport of 2-Methoxyestrone, Extracellular	Transport, extracellular
R_C05300t_pos	77	1.23891	0.0381281	0.0718944	C05300t	Transport of 16Alpha-Hydroxyestrone	Transport, extracellular
R_C05301te_pos	79	1.23365	0.0250536	0.0536924	C05301te	Transport of 2-Hydroxyestradiol-17Beta, Extracellular	Transport, extracellular
R_C05302te_pos	79	1.2461	0.0250536	0.0536924	C05302te	Transport of 2-Methoxyestradiol-17Beta, Extracellular	Transport, extracellular
R_C05463t1_pos	90	1.84769	0.00115504	0.0123231	C05463t1	Transport of Taurodeoxycholate	Transport, extracellular
R_C05463t2_neg	91	1.84699	0.000797809	0.0123231	C05463t2	Transport of Taurodeoxycholate, Antiport with Bicarbonate	Transport, extracellular
R_C05463t2_pos	87	1.59941	0.00314361	0.0195418	C05463t2	Transport of Taurodeoxycholate, Antiport with Bicarbonate	Transport, extracellular
R_C05767te_pos	38	-0.306025	0.411896	0.496012	C05767te	Assumed Passive Diffusion into Extracellular Space	Transport, extracellular
R_C05769te2_pos	94	1.64887	0.000226244	0.00830347	C05769te2	Passive Diffusion into Extracellular Space	Transport, extracellular
R_C05769te3_pos	94	1.64887	0.000226244	0.00830347	C05769te3	Transport by OATP1B Carriers into Extracellular Space	Transport, extracellular
R_C05769te_pos	83	1.48708	0.00969278	0.0304849	C05769te	Transport by Atb Binding Cassette Transporter ABCc2 into Extracellular Space	Transport, extracellular
R_C05770te3_pos	93	1.63371	0.000357228	0.0097357	C05770te3	Passive Diffusion into Extracellular Space	Transport, extracellular
R_C05770te4_pos	93	1.63371	0.000357228	0.0097357	C05770te4	Transport by OATP1B Carriers into Extracellular Space	Transport, extracellular
R_C05770te_pos	83	1.47072	0.00969278	0.0304849	C05770te	Transport by Atb Binding Cassette Transporter ABCc2 into Extracellular Space	Transport, extracellular
R_C05953t_neg	70	0.571888	0.130805	0.189642	C05953t	Transport of Prostaglandin A2, Lactate Antiport	Transport, extracellular
R_C05953t_pos	70	0.571888	0.130805	0.189642	C05953t	Transport of Prostaglandin A2, Lactate Antiport	Transport, extracellular
R_C05953tm_neg	74	1.26647	0.0674446	0.109256	C05953tm	Transport of Prostaglandin A2, Intracellular	Transport, mitochondrial
R_C05953tm_pos	74	1.26647	0.0674446	0.109256	C05953tm	Transport of Prostaglandin A2, Intracellular	Transport, mitochondrial
R_C05957t_neg	83	1.54876	0.00969278	0.0304849	C05957t	Transport of Prostaglandin J2, Lactate Antiport	Transport, extracellular
R_C05957t_pos	83	1.54876	0.00969278	0.0304849	C05957t	Transport of Prostaglandin J2, Lactate Antiport	Transport, extracellular
R_C05957td_neg	83	1.54876	0.00969278	0.0304849	C05957td	Transport of Prostaglandin J2, Diffusion	Transport, extracellular
R_C05957td_pos	83	1.54876	0.00969278	0.0304849	C05957td	Transport of Prostaglandin J2, Diffusion	Transport, extracellular
R_C06314t_neg	76	0.908666	0.0464515	0.0828554	C06314t	Transport of Lipoxin A4, Proton Symport	Transport, extracellular
R_C06314t_pos	66	0.578242	0.229864	0.307805	C06314t	Transport of Lipoxin A4, Proton Symport	Transport, extracellular
R_C06315t_neg	76	0.908666	0.0464515	0.0828554	C06315t	Transport of Lipoxin B4, Proton Symport	Transport, extracellular
R_C06315t_pos	63	0.450372	0.331162	0.414457	C06315t	Transport of Lipoxin B4, Proton Symport	Transport, extracellular
R_C06439t_neg	70	0.571888	0.130805	0.189642	C06439t	Transport of Prostaglandin E3, Lactate Antiport	Transport, extracellular
R_C06439t_pos	70	0.571888	0.130805	0.189642	C06439t	Transport of Prostaglandin E3, Lactate Antiport	Transport, extracellular
R_C09642te_neg	75	1.244	0.056192	0.0958446	C09642te	Facilitated Diffusion Through Uniport Oct2 into Extracellular Space	Transport, extracellular
R_C09642te_pos	69	0.709349	0.151941	0.214831	C09642te	Facilitated Diffusion Through Uniport Oct2 into Extracellular Space	Transport, extracellular
R_C100CPT1_pos	93	1.91527	0.000357228	0.0097357	C100CPT1	Production of Decanoylcarnitine	Fatty acid oxidation
R_C10164te_neg	79	1.3394	0.0250536	0.0536924	C10164te	Assumed Passive Diffusion into Extracellular Space	Transport, extracellular
R_C10164te_pos	77	1.24517	0.0381281	0.0718944	C10164te	Assumed Passive Diffusion into Extracellular Space	Transport, extracellular
R_C101CPT1_pos	84	1.47142	0.00744225	0.0264329	C101CPT1	Production of Decenoylcarnitine	Fatty acid oxidation
R_C101CRNe_pos	84	1.47142	0.00744225	0.0264329	C101CRNe	Transport of Decenoyl Carnitine into Extra Cellular Space	Fatty acid oxidation
R_C102CPT1_pos	84	1.47142	0.00744225	0.0264329	C102CPT1	Production of Decadienoylcarnitine	Fatty acid oxidation
R_C10CRNe_pos	93	1.91527	0.000357228	0.0097357	C10CRNe	Transport of Decanoyl Carnitine into Extra Cellular Space	Fatty acid oxidation
R_C10DCCACT_neg	85	1.55549	0.00565611	0.0245801	C10DCCACT	Transport of sebacoyl carnitine into cytosol	Fatty acid oxidation
R_C10DCCACT_pos	89	1.93888	0.00164325	0.0139691	C10DCCACT	Transport of sebacoyl carnitine into cytosol	Fatty acid oxidation
R_C10DCc_pos	85	1.55609	0.00565611	0.0245801	C10DCc	Production of sebacoylcarnitine	Fatty acid oxidation
R_C10DCe_pos	88	1.87485	0.00228626	0.0165261	C10DCe	Transport of sebacoyl carnitine into extra cellular space	Fatty acid oxidation
R_C10OHc_pos	89	1.79405	0.00164325	0.0139691	C10OHc	Production of 3-OHdecanoylcarnitinec	Fatty acid oxidation
R_C110CPT2m_pos	88	1.73179	0.00228626	0.0165261	C110CPT2m	DMNONCRNCPT2	Fatty acid oxidation
R_C11695td_neg	77	1.33639	0.0381281	0.0718944	C11695td	Transport of Anandamide, Diffusion	Transport, extracellular
R_C11695td_pos	83	1.37602	0.00969278	0.0304849	C11695td	Transport of Anandamide, Diffusion	Transport, extracellular
R_C120CPT1_pos	93	1.89349	0.000357228	0.0097357	C120CPT1	Production of Dodecanoylcarnitine	Fatty acid oxidation
R_C121CPT1_pos	84	1.47142	0.00744225	0.0264329	C121CPT1	Production of Dodecenoylcarnitine	Fatty acid oxidation
R_C12DCACOT_pos	85	1.55549	0.00565611	0.0245801	C12DCACOT	Thioesterification of Dodecanedioyl Coenzyme A for Release into Cytosol	Fatty acid oxidation
R_C12DCACT_pos	85	1.55609	0.00565611	0.0245801	C12DCACT	Activation of Dodecanedioic Acid	Fatty acid oxidation
R_C12DCTD_pos	85	1.55549	0.00565611	0.0245801	C12DCTD	Transport of Dodecanedioic Acid by Diffusion	Fatty acid oxidation
R_C12DCe_pos	88	1.8279	0.00228626	0.0165261	C12DCe	Excretion of Dodecanedioyl Carnitine	Fatty acid oxidation
R_C12OHc_pos	92	1.85604	0.000535842	0.0116505	C12OHc	Production of 3-OHdodecanoylcarnitinec	Fatty acid oxidation
R_C13856te_neg	78	1.37417	0.0310312	0.0617975	C13856te	Assumed Passive Diffusion into Extracellular Space	Transport, extracellular
R_C13856te_pos	84	1.47733	0.00744225	0.0264329	C13856te	Assumed Passive Diffusion into Extracellular Space	Transport, extracellular
R_C141ACBP_pos	85	1.57276	0.00565611	0.0245801	C141ACBP	Transport of 3-Hydroxytetradecenoyl Coenzyme A from Mitochondria into Cytosol	Fatty acid oxidation
R_C141CPT1_pos	84	1.47142	0.00744225	0.0264329	C141CPT1	Production of Tetradecenoylcarnitine	Fatty acid oxidation
R_C141OHc_pos	85	1.57276	0.00565611	0.0245801	C141OHc	Production of 3-Hydroxytetradecenoyl Carnitine	Fatty acid oxidation
R_C141OHe_pos	85	1.57276	0.00565611	0.0245801	C141OHe	Excretion of 3-Hydroxy Tetradecenoyl-7-Carnitine	Fatty acid oxidation
R_C142ACBP_pos	88	1.69216	0.00228626	0.0165261	C142ACBP	Transport of 3-Hydroxytetradeca Dienoyl Coenzyme A from Mitochondria into Cytosol	Fatty acid oxidation
R_C142CPT1_pos	84	1.47142	0.00744225	0.0264329	C142CPT1	Production of Tetradecadienoylcarnitine	Fatty acid oxidation
R_C142OHc_pos	88	1.69216	0.00228626	0.0165261	C142OHc	Production of 3-Hydroxytetradeca Dienoyl Carnitine	Fatty acid oxidation
R_C142OHe_pos	88	1.69216	0.00228626	0.0165261	C142OHe	Excretion of 3-Hydroxy Trans5,8Tetradecadienoyl Carnitine	Fatty acid oxidation
R_C14768ATP_pos	90	1.69497	0.00115504	0.0123231	C14768ATP	Transport of 5, 6-EET, Active Transport	Transport, extracellular
R_C14768td_neg	90	1.69497	0.00115504	0.0123231	C14768td	Transport of 5, 6-EET, Diffusion	Transport, extracellular
R_C14768td_pos	84	1.48807	0.00744225	0.0264329	C14768td	Transport of 5, 6-EET, Diffusion	Transport, extracellular
R_C14769td1_neg	90	1.69497	0.00115504	0.0123231	C14769td1	Transport of 8, 9-EET, Diffusion	Transport, extracellular
R_C14769td1_pos	84	1.48807	0.00744225	0.0264329	C14769td1	Transport of 8, 9-EET, Diffusion	Transport, extracellular
R_C14769td2_pos	90	1.69497	0.00115504	0.0123231	C14769td2	Transport of 8, 9-EET, Active Transport	Transport, extracellular
R_C14770ATP_pos	90	1.69497	0.00115504	0.0123231	C14770ATP	Transport of 11, 12-EET, FATP	Transport, extracellular
R_C14770UPKt_pos	90	1.69497	0.00115504	0.0123231	C14770UPKt	Transport of 11, 12-EET, Diffusion	Transport, extracellular
R_C14771ATP_pos	90	1.69497	0.00115504	0.0123231	C14771ATP	Transport of 14, 15-EET, Active Transport	Transport, extracellular
R_C14771UPKt_pos	90	1.69497	0.00115504	0.0123231	C14771UPKt	Transport of 14, 15-EET, Diffusion	Transport, extracellular
R_C14825ATP_pos	90	1.69497	0.00115504	0.0123231	C14825ATP	Transport of 9 (10)-Epome, Active Transport	Transport, extracellular
R_C14825c_pos	83	1.48113	0.00969278	0.0304849	C14825c	Formation of 9 (10)-Epome	Fatty acid oxidation
R_C14825td_neg	90	1.69497	0.00115504	0.0123231	C14825td	Transport of 9 (10)-Epome, Diffusion	Transport, extracellular
R_C14825td_pos	83	1.48113	0.00969278	0.0304849	C14825td	Transport of 9 (10)-Epome, Diffusion	Transport, extracellular
R_C14826ATP_pos	90	1.69497	0.00115504	0.0123231	C14826ATP	Transport of 12 (13)-Epome, FATP	Transport, extracellular
R_C14826td_neg	90	1.69497	0.00115504	0.0123231	C14826td	Transport of 12 (13)-Epome, Diffusion	Transport, extracellular
R_C14826td_pos	78	1.41998	0.0310312	0.0617975	C14826td	Transport of 12 (13)-Epome, Diffusion	Transport, extracellular
R_C14OHc_pos	92	1.77361	0.000535842	0.0116505	C14OHc	Production of 3-hydroxytetradecanoylcarnitine	Fatty acid oxidation
R_C14STR_pos	73	0.830408	0.0804001	0.124359	C14STR	C 14 sterol reductase	Cholesterol metabolism
R_C14STRr_pos	70	0.533196	0.130805	0.189642	C14STRr	C-14 sterol reductase	Cholesterol metabolism
R_C160CPT1_neg	72	0.68755	0.0951774	0.143538	C160CPT1	Carnitine O-palmitoyltransferase	Fatty acid oxidation
R_C160CPT1_pos	72	0.68755	0.0951774	0.143538	C160CPT1	Carnitine O-palmitoyltransferase	Fatty acid oxidation
R_C160CPT2_neg	60	0.317838	0.456097	0.540863	C160CPT2	C160 transport into the mitochondria	Fatty acid oxidation
R_C160CPT2_pos	60	0.257168	0.456097	0.540863	C160CPT2	C160 transport into the mitochondria	Fatty acid oxidation
R_C160CRNt_neg	69	0.608912	0.151941	0.214831	C160CRNt	C160 transport into the mitochondria	Fatty acid oxidation
R_C160CRNt_pos	69	0.608912	0.151941	0.214831	C160CRNt	C160 transport into the mitochondria	Fatty acid oxidation
R_C161CPT12_neg	94	1.90451	0.000226244	0.00830347	C161CPT12	Carnitine O-palmitoyltransferase	Fatty acid oxidation
R_C161CPT12_pos	89	1.62732	0.00164325	0.0139691	C161CPT12	Carnitine O-palmitoyltransferase	Fatty acid oxidation
R_C161CPT1_neg	91	1.67156	0.000797809	0.0123231	C161CPT1	Carnitine O-palmitoyltransferase	Fatty acid oxidation
R_C161CPT1_pos	91	1.67156	0.000797809	0.0123231	C161CPT1	Carnitine O-palmitoyltransferase	Fatty acid oxidation
R_C161CPT22_neg	59	0.452962	0.502727	0.581969	C161CPT22	C161 transport into the mitochondria	Fatty acid oxidation
R_C161CPT22_pos	89	1.64752	0.00164325	0.0139691	C161CPT22	C161 transport into the mitochondria	Fatty acid oxidation
R_C161CPT2_neg	91	1.67156	0.000797809	0.0123231	C161CPT2	C161 transport into the mitochondria	Fatty acid oxidation
R_C161CPT2_pos	91	1.67156	0.000797809	0.0123231	C161CPT2	C161 transport into the mitochondria	Fatty acid oxidation
R_C161CRN2t_neg	73	0.847758	0.0804001	0.124359	C161CRN2t	C161 transport into the mitochondria	Fatty acid oxidation
R_C161CRN2t_pos	73	0.847758	0.0804001	0.124359	C161CRN2t	C161 transport into the mitochondria	Fatty acid oxidation
R_C161CRNt_neg	93	1.8757	0.000357228	0.0097357	C161CRNt	C161 transport into the mitochondria	Fatty acid oxidation
R_C161CRNt_pos	93	1.8757	0.000357228	0.0097357	C161CRNt	C161 transport into the mitochondria	Fatty acid oxidation
R_C161OHc_pos	84	1.40707	0.00744225	0.0264329	C161OHc	Production of 3-Hydroxyhexadecenoylcarnitine	Fatty acid oxidation
R_C162ACBP_pos	84	1.50124	0.00744225	0.0264329	C162ACBP	Transport of 3-Hydroxy Trans7, 10-Hexadecadienoylcoa from Mitochondria into Cytosol	Fatty acid oxidation
R_C162OHc_pos	84	1.50124	0.00744225	0.0264329	C162OHc	Production of 3-Hydroxy Hexadecadienoyl Carnitine	Fatty acid oxidation
R_C162OHe_pos	84	1.50124	0.00744225	0.0264329	C162OHe	Excretion of 3-Hydroxy Trans7,10-Hexadecadienoyl Carnitine	Fatty acid oxidation
R_C16DCc_pos	88	1.77006	0.00228626	0.0165261	C16DCc	Production of Hexadecanedioylcarnitine	Fatty acid oxidation
R_C16DCe_pos	88	1.77006	0.00228626	0.0165261	C16DCe	Transport of Hexadecanedioic Acid Mono-L-Carnitine Ester into Extra Cellular Space	Fatty acid oxidation
R_C16OHc_pos	86	1.60031	0.0042391	0.0222853	C16OHc	Production of 3-hydroxyhexadecanoylcarnitinec	Fatty acid oxidation
R_C180CPT1_neg	80	1.15401	0.0200405	0.0465357	C180CPT1	Carnitine O-stearoyl transferase	Fatty acid oxidation
R_C180CPT1_pos	36	-0.390545	0.331162	0.414457	C180CPT1	Carnitine O-stearoyl transferase	Fatty acid oxidation
R_C180CPT2_neg	80	1.18125	0.0200405	0.0465357	C180CPT2	Carnitine O-stearoyl transferase	Fatty acid oxidation
R_C180CPT2_pos	40	-0.337631	0.502727	0.581969	C180CPT2	Carnitine O-stearoyl transferase	Fatty acid oxidation
R_C180CRNt_neg	73	0.847758	0.0804001	0.124359	C180CRNt	C180 transport into the mitochondria	Fatty acid oxidation
R_C180CRNt_pos	73	0.847758	0.0804001	0.124359	C180CRNt	C180 transport into the mitochondria	Fatty acid oxidation
R_C181CPT1_neg	84	1.55691	0.00744225	0.0264329	C181CPT1	Carnitine octadecenoyl transferase	Fatty acid oxidation
R_C181CPT1_pos	84	1.55691	0.00744225	0.0264329	C181CPT1	Carnitine octadecenoyl transferase	Fatty acid oxidation
R_C181CPT2_neg	84	1.55691	0.00744225	0.0264329	C181CPT2	Carnitine octadecenoyl transferase	Fatty acid oxidation
R_C181CPT2_pos	84	1.55691	0.00744225	0.0264329	C181CPT2	Carnitine octadecenoyl transferase	Fatty acid oxidation
R_C181CRNt_neg	69	0.608912	0.151941	0.214831	C181CRNt	C181 transport into the mitochondria	Fatty acid oxidation
R_C181CRNt_pos	69	0.608912	0.151941	0.214831	C181CRNt	C181 transport into the mitochondria	Fatty acid oxidation
R_C181OHc_pos	86	1.59248	0.0042391	0.0222853	C181OHc	Production of 3-Hydroxyoctadecenoylcarnitinec	Fatty acid oxidation
R_C182OHc_pos	84	1.52113	0.00744225	0.0264329	C182OHc	Production of 3-Hydroxyoctadecadienoylcarnitine	Fatty acid oxidation
R_C18OHc_pos	83	1.40934	0.00969278	0.0304849	C18OHc	Production of 3-Hydroxyoctadecanoylcarnitine	Fatty acid oxidation
R_C204CPT1_neg	77	1.26769	0.0381281	0.0718944	C204CPT1	Carnitine C20:4 transferase	Fatty acid oxidation
R_C204CPT1_pos	87	1.59297	0.00314361	0.0195418	C204CPT1	Carnitine C20:4 transferase	Fatty acid oxidation
R_C204CPT2_neg	89	1.58841	0.00164325	0.0139691	C204CPT2	Arachidonic acid transport into the mitochondria	Fatty acid oxidation
R_C204CPT2_pos	96	2.38291	8.33532e-05	0.00769926	C204CPT2	Arachidonic acid transport into the mitochondria	Fatty acid oxidation
R_C204CRNt_neg	73	0.847758	0.0804001	0.124359	C204CRNt	Arachidonic acid transport into the mitochondria	Fatty acid oxidation
R_C204CRNt_pos	73	0.847758	0.0804001	0.124359	C204CRNt	Arachidonic acid transport into the mitochondria	Fatty acid oxidation
R_C226COAtx_neg	87	1.63077	0.00314361	0.0195418	C226COAtx	Fatty acid intracellular transport	Transport, peroxisomal
R_C226COAtx_pos	89	1.83665	0.00164325	0.0139691	C226COAtx	Fatty acid intracellular transport	Transport, peroxisomal
R_C226CPT1_pos	91	1.87232	0.000797809	0.0123231	C226CPT1	Carnitine C22:6 transferase	Fatty acid oxidation
R_C226CPT2_pos	91	1.87232	0.000797809	0.0123231	C226CPT2	C226 transport into the mitochondria	Fatty acid oxidation
R_C226CRNt_neg	88	1.55815	0.00228626	0.0165261	C226CRNt	C226 transport into the mitochondria	Fatty acid oxidation
R_C226CRNt_pos	88	1.55815	0.00228626	0.0165261	C226CRNt	C226 transport into the mitochondria	Fatty acid oxidation
R_C30CPT1_neg	90	1.81507	0.00115504	0.0123231	C30CPT1	Production of propionylcarnitine	Fatty acid oxidation
R_C30CPT1_pos	90	1.81507	0.00115504	0.0123231	C30CPT1	Production of propionylcarnitine	Fatty acid oxidation
R_C3DCe_pos	90	1.71876	0.00115504	0.0123231	C3DCe	Transport of Malonyl Carnitine into Extra Cellular Space	Fatty acid oxidation
R_C3STDH1Pr_pos	70	0.533196	0.130805	0.189642	C3STDH1Pr	C-3 sterol dehydrogenase (4-methylzymosterol)	Cholesterol metabolism
R_C3STDH1_pos	71	0.791974	0.111943	0.166021	C3STDH1	C 3 sterol dehydrogenase 4 methylzymosterol	Cholesterol metabolism
R_C3STDH1r_pos	70	0.531336	0.130805	0.189642	C3STDH1r	C-3 sterol dehydrogenase (4-methylzymosterol)	Cholesterol metabolism
R_C3STKR2r_pos	76	0.814738	0.0464515	0.0828554	C3STKR2r	C-3 sterol keto reductase (zymosterol)	Cholesterol metabolism
R_C40CPT1_neg	84	1.55691	0.00744225	0.0264329	C40CPT1	Production of butyrylcarnitine	Fatty acid oxidation
R_C40CPT1_pos	91	1.67156	0.000797809	0.0123231	C40CPT1	Production of butyrylcarnitine	Fatty acid oxidation
R_C4CRNCPT2_neg	84	1.55691	0.00744225	0.0264329	C4CRNCPT2	Transport of butyryl carnitine in the mitochondrial matrix for final hydrolysis	Fatty acid oxidation
R_C4CRNCPT2_pos	91	1.67156	0.000797809	0.0123231	C4CRNCPT2	Transport of butyryl carnitine in the mitochondrial matrix for final hydrolysis	Fatty acid oxidation
R_C4CRNe_pos	90	1.75816	0.00115504	0.0123231	C4CRNe	Transport of butyryl carnitine into the extra cellular space	Fatty acid oxidation
R_C4DCCACT_neg	87	1.58149	0.00314361	0.0195418	C4DCCACT	Transport of succinyl carnitine into cytosol	Fatty acid oxidation
R_C4DCCACT_pos	93	1.88267	0.000357228	0.0097357	C4DCCACT	Transport of succinyl carnitine into cytosol	Fatty acid oxidation
R_C4DCe_pos	85	1.57594	0.00565611	0.0245801	C4DCe	Transport of succinyl carnitine into the extra cellular space	Fatty acid oxidation
R_C4OHc_pos	84	1.50485	0.00744225	0.0264329	C4OHc	Production of 3-hydroxybytyryl carnitinec	Fatty acid oxidation
R_C4STMO1r_pos	72	0.759383	0.0951774	0.143538	C4STMO1r	C-4 sterol methyl oxidase (4,4-dimethylzymosterol)	Cholesterol metabolism
R_C4STMO2Pr_pos	76	0.814738	0.0464515	0.0828554	C4STMO2Pr	C-4 methyl sterol oxidase	Cholesterol metabolism
R_C4STMO2r_pos	76	0.814103	0.0464515	0.0828554	C4STMO2r	C-4 methyl sterol oxidase	Cholesterol metabolism
R_C4tcx_neg	79	1.11338	0.0250536	0.0536924	C4tcx	Transport of Bytyrylcarnitine from Peroxisomes	Transport, peroxisomal
R_C4tcx_pos	76	0.844328	0.0464515	0.0828554	C4tcx	Transport of Bytyrylcarnitine from Peroxisomes	Transport, peroxisomal
R_C4tmc_neg	69	0.608912	0.151941	0.214831	C4tmc	Transport of bytyrylcarnitine into mitochondrial matrix	Transport, mitochondrial
R_C4tmc_pos	69	0.608912	0.151941	0.214831	C4tmc	Transport of bytyrylcarnitine into mitochondrial matrix	Transport, mitochondrial
R_C4x_neg	79	1.11338	0.0250536	0.0536924	C4x	Esterification of Butyrylcoa to Butyrylcarnitine for Transport	Transport, peroxisomal
R_C4x_pos	76	0.844328	0.0464515	0.0828554	C4x	Esterification of Butyrylcoa to Butyrylcarnitine for Transport	Transport, peroxisomal
R_C50CPT1_pos	80	1.28384	0.0200405	0.0465357	C50CPT1	Production of isovalerylcarnitine	Fatty acid oxidation
R_C51CPT1_pos	86	1.55195	0.0042391	0.0222853	C51CPT1	Production of tiglylcarnitine	Fatty acid oxidation
R_C5DCe_pos	85	1.53957	0.00565611	0.0245801	C5DCe	Transport of Glutaryl Carnitine into the Extra Cellular Fluid	Fatty acid oxidation
R_C60CPT1_neg	96	2.06219	8.33532e-05	0.00769926	C60CPT1	Production of Hexanoylcarnitine	Fatty acid oxidation
R_C60CPT1_pos	91	1.75596	0.000797809	0.0123231	C60CPT1	Production of Hexanoylcarnitine	Fatty acid oxidation
R_C6COAt_neg	91	1.75596	0.000797809	0.0123231	C6COAt	Esterification of Of Hexanoylcoa for Transport into Cytosol	Transport, peroxisomal
R_C6COAt_pos	96	2.06219	8.33532e-05	0.00769926	C6COAt	Esterification of Of Hexanoylcoa for Transport into Cytosol	Transport, peroxisomal
R_C6CRNe_pos	87	1.63326	0.00314361	0.0195418	C6CRNe	Transport of Hexanoyl Carnitine into the Extra Cellular Fluid	Fatty acid oxidation
R_C6CRNtcx_neg	91	1.75596	0.000797809	0.0123231	C6CRNtcx	Transport of Hexanoylcarnitine into Cytosol	Transport, peroxisomal
R_C6CRNtcx_pos	96	2.06219	8.33532e-05	0.00769926	C6CRNtcx	Transport of Hexanoylcarnitine into Cytosol	Transport, peroxisomal
R_C6DCCACT_neg	85	1.55549	0.00565611	0.0245801	C6DCCACT	Transport of adipoyl carnitine into cytosol	Fatty acid oxidation
R_C6DCCACT_pos	90	1.96038	0.00115504	0.0123231	C6DCCACT	Transport of adipoyl carnitine into cytosol	Fatty acid oxidation
R_C6DCc_pos	85	1.55609	0.00565611	0.0245801	C6DCc	Production of adipoylcarnitine	Fatty acid oxidation
R_C6DCe_pos	89	1.95246	0.00164325	0.0139691	C6DCe	Transport of adipoyl carnitine into the extra cellular fluid	Fatty acid oxidation
R_C80CPT1_neg	84	1.50895	0.00744225	0.0264329	C80CPT1	Production of octanoylcarnitine	Fatty acid oxidation
R_C80CPT1_pos	61	0.368013	0.411896	0.496012	C80CPT1	Production of octanoylcarnitine	Fatty acid oxidation
R_C81CPT1_pos	84	1.47142	0.00744225	0.0264329	C81CPT1	Production of Ocetenoylcarnitine	Fatty acid oxidation
R_C81CRNe_pos	84	1.47142	0.00744225	0.0264329	C81CRNe	Transport of Octenoyl Carnitine into the Extra Cellular Space	Fatty acid oxidation
R_C8CRNe_pos	82	1.33816	0.0124673	0.0352696	C8CRNe	Transport of octanoyl carnitine into the extra cellular space	Fatty acid oxidation
R_C8DCc_neg	90	1.92907	0.00115504	0.0123231	C8DCc	Production of suberylcarnitine	Fatty acid oxidation
R_C8DCc_pos	85	1.55609	0.00565611	0.0245801	C8DCc	Production of suberylcarnitine	Fatty acid oxidation
R_C8DCe_pos	88	1.92809	0.00228626	0.0165261	C8DCe	Transport of suberyl carnitine into the extra cellular space	Fatty acid oxidation
R_C9BRxtc_neg	79	1.42891	0.0250536	0.0536924	C9BRxtc	Transport of dimethylnonanoylcarnitine from peroxisomes to cytosol	Transport, peroxisomal
R_C9BRxtc_pos	79	1.42891	0.0250536	0.0536924	C9BRxtc	Transport of dimethylnonanoylcarnitine from peroxisomes to cytosol	Transport, peroxisomal
R_CA24GSc_pos	86	1.56943	0.0042391	0.0222853	CA24GSc	UDP-Glucuronosyltransferase (UGT) cytosolic (cholic acid)	Bile acid synthesis
R_CA24GSr_pos	85	1.59959	0.00565611	0.0245801	CA24GSr	UDP-Glucuronosyltransferase (UGT) (cholic acid)	Bile acid synthesis
R_CA24Gte_pos	85	1.55893	0.00565611	0.0245801	CA24Gte	Glucuronidated bile acid excretion (CA-24G)	Transport, extracellular
R_CA24Gtr_neg	85	1.59959	0.00565611	0.0245801	CA24Gtr	Glucuronidated Compound Transport (CA-24G)	Transport, extracellular
R_CA2t_neg	37	-0.396622	0.370219	0.45494	CA2t	Calcium (Ca+2) transport via diffusion (extracellular to periplasm)	Transport, extracellular
R_CA2t_pos	29	-0.611466	0.130805	0.189642	CA2t	Calcium (Ca+2) transport via diffusion (extracellular to periplasm)	Transport, extracellular
R_CA3Sabc_pos	84	1.46668	0.00744225	0.0264329	CA3Sabc	Cholic acid 3-sulfate ABC bile acid transporter	Transport, extracellular
R_CA3St_neg	83	1.46833	0.00969278	0.0304849	CA3St	Cholic acid 3-sulfate transport via bicarbonate countertransport	Transport, extracellular
R_CA3St_pos	83	1.46441	0.00969278	0.0304849	CA3St	Cholic acid 3-sulfate transport via bicarbonate countertransport	Transport, extracellular
R_CAATPS_1_pos	44	-0.272871	0.7103	0.749568	CAATPS_1	Ca ATPase	Transport, extracellular
R_CALAtr_neg	81	1.51164	0.0158966	0.0405158	CALAtr	Transport of 3-Ureidopropionate	Transport, extracellular
R_CALAtr_pos	81	1.51164	0.0158966	0.0405158	CALAtr	Transport of 3-Ureidopropionate	Transport, extracellular
R_CAMPt_pos	78	1.30714	0.0310312	0.0617975	CAMPt	CAMP transport (ATP-dependent)	Transport, extracellular
R_CAPROICc_pos	74	1.23695	0.0674446	0.109256	CAPROICc	Formation of Hexanoic Acid	Fatty acid oxidation
R_CARBIBUP_SGLUthv_pos	81	1.43557	0.0158966	0.0405158	CARBIBUP_SGLUthv	Release of S-carboxy ibuprofen glucuronide into hepatic vein	Drug metabolism
R_CARIBUPGLU_Sitr_neg	81	1.43557	0.0158966	0.0405158	CARIBUPGLU_Sitr	CARIBUPGLU Sitr	Drug metabolism
R_CARIBUP_Rthv_pos	79	1.37799	0.0250536	0.0536924	CARIBUP_Rthv	Release of R-carboxy ibuprofen into hepatic vein	Drug metabolism
R_CARIBUP_SGLUhep_pos	81	1.43557	0.0158966	0.0405158	CARIBUP_SGLUhep	Glucuronidation of S-carboxy ibuprofen	Drug metabolism
R_CARIBUP_Sitr_pos	81	1.43557	0.0158966	0.0405158	CARIBUP_Sitr	CARIBUP Sitr	Drug metabolism
R_CARIBUP_Sthv_neg	79	1.39333	0.0250536	0.0536924	CARIBUP_Sthv	Release of S-carboxy ibuprofen into hepatic vein	Drug metabolism
R_CARIBUP_Sthv_pos	82	1.37757	0.0124673	0.0352696	CARIBUP_Sthv	Release of S-carboxy ibuprofen into hepatic vein	Drug metabolism
R_CARN140t_m_neg	73	0.847758	0.0804001	0.124359	CARN140t_m	Tetradecanoyl-l-carnitine:carnitine antiport (Cytosol to mitochondira)	Transport, mitochondrial
R_CARN140t_m_pos	73	0.847758	0.0804001	0.124359	CARN140t_m	Tetradecanoyl-l-carnitine:carnitine antiport (Cytosol to mitochondira)	Transport, mitochondrial
R_CARN160t_m_neg	69	0.608912	0.151941	0.214831	CARN160t_m	Hexadecanoyl-l-carnitine:carnitine antiport (Cytosol to mitochondira)	Transport, mitochondrial
R_CARN160t_m_pos	69	0.608912	0.151941	0.214831	CARN160t_m	Hexadecanoyl-l-carnitine:carnitine antiport (Cytosol to mitochondira)	Transport, mitochondrial
R_CARN1619Zt_m_neg	93	1.8757	0.000357228	0.0097357	CARN1619Zt_m	(9Z)-hexadecenoyl-l-carnitine:carnitine antiport (Cytosol to mitochondira)	Transport, mitochondrial
R_CARN1619Zt_m_pos	93	1.8757	0.000357228	0.0097357	CARN1619Zt_m	(9Z)-hexadecenoyl-l-carnitine:carnitine antiport (Cytosol to mitochondira)	Transport, mitochondrial
R_CARN180t_m_neg	73	0.847758	0.0804001	0.124359	CARN180t_m	Octadecanoyl-l-carnitine:carnitine antiport (Cytosol to mitochondira)	Transport, mitochondrial
R_CARN180t_m_pos	73	0.847758	0.0804001	0.124359	CARN180t_m	Octadecanoyl-l-carnitine:carnitine antiport (Cytosol to mitochondira)	Transport, mitochondrial
R_CARN1819Zt_m_neg	69	0.608912	0.151941	0.214831	CARN1819Zt_m	(9Z)-octadecenoyl-l-carnitine:carnitine antiport (Cytosol to mitochondira)	Transport, mitochondrial
R_CARN1819Zt_m_pos	69	0.608912	0.151941	0.214831	CARN1819Zt_m	(9Z)-octadecenoyl-l-carnitine:carnitine antiport (Cytosol to mitochondira)	Transport, mitochondrial
R_CARN1829Z12Zt_m_neg	73	0.847758	0.0804001	0.124359	CARN1829Z12Zt_m	(9Z,12Z)-octadecadienoyl-l-carnitine:carnitine antiport (Cytosol to mitochondira)	Transport, mitochondrial
R_CARN1829Z12Zt_m_pos	73	0.847758	0.0804001	0.124359	CARN1829Z12Zt_m	(9Z,12Z)-octadecadienoyl-l-carnitine:carnitine antiport (Cytosol to mitochondira)	Transport, mitochondrial
R_CARN1836Z9Z12Zt_m_neg	73	0.847758	0.0804001	0.124359	CARN1836Z9Z12Zt_m	(6Z,9Z,12Z)-octadecatrienoyl-l-carnitine:carnitine antiport (Cytosol to mitochondira)	Transport, mitochondrial
R_CARN1836Z9Z12Zt_m_pos	73	0.847758	0.0804001	0.124359	CARN1836Z9Z12Zt_m	(6Z,9Z,12Z)-octadecatrienoyl-l-carnitine:carnitine antiport (Cytosol to mitochondira)	Transport, mitochondrial
R_CARNtr_neg	51	0.13105	0.940843	0.950233	CARNtr	Transport of Carnosine	Transport, extracellular
R_CARNtr_pos	81	1.31095	0.0158966	0.0405158	CARNtr	Transport of Carnosine	Transport, extracellular
R_CAROtr_pos	81	1.37014	0.0158966	0.0405158	CAROtr	Beta-carotene transport via diffusion	Transport, extracellular
R_CARPEPT1tc_pos	51	0.13105	0.940843	0.950233	CARPEPT1tc	Transport of L-Carnosine by the apical PEPT1 amino acid transporters across the brush border cells of the enterocytes of the intestine and renal cells	Transport, extracellular
R_CARVEOLte_neg	76	1.29322	0.0464515	0.0828554	CARVEOLte	Xenobiotic transport	Transport, extracellular
R_CASULT_pos	83	1.45458	0.00969278	0.0304849	CASULT	Cholic acid sulfotransferase	Bile acid synthesis
R_CAT2p_pos	78	1.35821	0.0310312	0.0617975	CAT2p	Catalase A, peroxisomal (ethanol)	Glycolysis/gluconeogenesis
R_CATm_pos	85	1.44736	0.00565611	0.0245801	CATm	Catalase	ROS detoxification
R_CATp_pos	82	1.4208	0.0124673	0.0352696	CATp	Catalase A peroxisomal	Miscellaneous
R_CATr_pos	77	1.38691	0.0381281	0.0718944	CATr	Catalase	ROS detoxification
R_CAt7r_neg	35	-0.143081	0.294725	0.375028	CAt7r	Calcium / sodium antiporter (1:3), reversible	Transport, extracellular
R_CAt7r_pos	34	-0.248872	0.260979	0.340299	CAt7r	Calcium / sodium antiporter (1:3), reversible	Transport, extracellular
R_CBASPte_neg	75	0.95935	0.056192	0.0958446	CBASPte	Transport of N-carbamoyl-L-aspartate	Transport, extracellular
R_CBASPte_pos	77	1.30443	0.0381281	0.0718944	CBASPte	Transport of N-carbamoyl-L-aspartate	Transport, extracellular
R_CBL2OR_pos	86	1.70501	0.0042391	0.0222853	CBL2OR	NADH:cob(III)alamine oxidoreductase	Vitamin B12 metabolism
R_CBL2tm_pos	86	1.70501	0.0042391	0.0222853	CBL2tm	Cob(II)alamine transport, mitochondrial	Transport, mitochondrial
R_CBPPer_pos	58	0.219032	0.551631	0.629058	CBPPer	Carbamoyl phosphate phosphotransferase, endoplasmic reticulum	Glycolysis/gluconeogenesis
R_CBPS_pos	68	0.687991	0.175411	0.24229	CBPS	Carbamoyl-phosphate synthase (glutamine-hydrolysing)	Pyrimidine synthesis
R_CBPSam_pos	63	0.62781	0.331162	0.414457	CBPSam	Carbamoyl-phosphate synthase (ammonia) (mitochondria	Glutamate metabolism
R_CBPter_pos	58	0.219032	0.551631	0.629058	CBPter	Carbamoyl phosphate transport, endoplasmic reticulum	Transport, endoplasmic reticular
R_CBR2_pos	27	-0.887211	0.0951774	0.143538	CBR2	Carbonyl reductase [NADPH] 1	Eicosanoid metabolism
R_CDCA24GSc_pos	88	1.70091	0.00228626	0.0165261	CDCA24GSc	UDP-Glucuronosyltransferase (UGT) cytosolic (chenodeoxycholic acid)	Bile acid synthesis
R_CDCA24GSr_pos	87	1.59756	0.00314361	0.0195418	CDCA24GSr	UDP-Glucuronosyltransferase (UGT) (chenodeoxycholic acid)	Bile acid synthesis
R_CDCA24Gte_pos	89	1.82077	0.00164325	0.0139691	CDCA24Gte	Glucuronidated bile acid excretion (CDCA-24G)	Transport, extracellular
R_CDCA24Gtr_neg	87	1.59756	0.00314361	0.0195418	CDCA24Gtr	Glucuronidated Compound Transport (CDCA-24G)	Transport, extracellular
R_CDCA3GSc_pos	88	1.70099	0.00228626	0.0165261	CDCA3GSc	UDP-Glucuronosyltransferase (UGT) cytosolic (chenodeoxycholic acid)	Bile acid synthesis
R_CDCA3GSr_pos	87	1.59761	0.00314361	0.0195418	CDCA3GSr	UDP-Glucuronosyltransferase (UGT) ER (chenodeoxycholic acid)	Bile acid synthesis
R_CDCA3Gte_pos	89	1.82085	0.00164325	0.0139691	CDCA3Gte	Glucuronidated bile acid excretion (CDCA-3G)	Transport, extracellular
R_CDCA3Gtr_neg	87	1.59761	0.00314361	0.0195418	CDCA3Gtr	Glucuronidated Compound Transport (CDCA-3G)	Transport, extracellular
R_CDCA6AH_pos	78	1.36963	0.0310312	0.0617975	CDCA6AH	Chenodeoxycholic acid 6alpha-hydroxylase	Bile acid synthesis
R_CDIPTr_neg	70	0.74301	0.130805	0.189642	CDIPTr	Phosphatidylinositol synthase (Homo sapiens)	Glycerophospholipid metabolism
R_CDIPTr_pos	42	-0.268314	0.602679	0.673269	CDIPTr	Phosphatidylinositol synthase (Homo sapiens)	Glycerophospholipid metabolism
R_CDPDAGtm_neg	63	0.445635	0.331162	0.414457	CDPDAGtm	Intracellular transport	Transport, mitochondrial
R_CDS_pos	42	-0.268314	0.602679	0.673269	CDS	Phosphatidate cytidylyltransferase	Glycerophospholipid metabolism
R_CDSm_pos	63	0.445635	0.331162	0.414457	CDSm	Phosphatidate cytidylyltransferase	Glycerophospholipid metabolism
R_CE0328t_pos	90	1.86466	0.00115504	0.0123231	CE0328t	Transport of Docosahexaenoate	Transport, extracellular
R_CE0737te_neg	78	1.38747	0.0310312	0.0617975	CE0737te	Assumed Passive Diffusion into Extracellular Space	Transport, extracellular
R_CE0737te_pos	73	1.30146	0.0804001	0.124359	CE0737te	Assumed Passive Diffusion into Extracellular Space	Transport, extracellular
R_CE0955te_neg	89	1.6659	0.00164325	0.0139691	CE0955te	Transport of 6-Oxo-Prostaglandin F1Alpha, Lactate Antiport	Transport, extracellular
R_CE0955te_pos	69	1.17721	0.151941	0.214831	CE0955te	Transport of 6-Oxo-Prostaglandin F1Alpha, Lactate Antiport	Transport, extracellular
R_CE1243ATP_pos	90	1.69497	0.00115504	0.0123231	CE1243ATP	Transport of 12S-HHT, FATP	Transport, extracellular
R_CE1243UPKt_pos	90	1.69508	0.00115504	0.0123231	CE1243UPKt	Transport of 12S-HHT by Diffusion	Transport, extracellular
R_CE1261t_neg	85	1.32536	0.00565611	0.0245801	CE1261t	Transport of 5-S-Cysteinyldopa	Transport, extracellular
R_CE1261t_pos	71	0.908343	0.111943	0.166021	CE1261t	Transport of 5-S-Cysteinyldopa	Transport, extracellular
R_CE1273t1_pos	90	1.84769	0.00115504	0.0123231	CE1273t1	Transport of 5Beta-Cholestane-3Alpha, 7Alpha, 12Alpha, 24S, 25-Pentol, Active Transport	Transport, extracellular
R_CE1273t2_neg	91	1.84699	0.000797809	0.0123231	CE1273t2	Transport of 5Beta-Cholestane-3Alpha, 7Alpha, 12Alpha, 24S, 25-Pentol, Atiport with Bicarbonate	Transport, extracellular
R_CE1273t2_pos	76	1.31365	0.0464515	0.0828554	CE1273t2	Transport of 5Beta-Cholestane-3Alpha, 7Alpha, 12Alpha, 24S, 25-Pentol, Atiport with Bicarbonate	Transport, extracellular
R_CE1297t_pos	90	1.69497	0.00115504	0.0123231	CE1297t	Active Transport of 8-Dehydrocholesterol	Transport, extracellular
R_CE1297td_neg	90	1.69497	0.00115504	0.0123231	CE1297td	Transport of 8-Dehydrocholesterol, Diffusion	Transport, extracellular
R_CE1352te_pos	74	1.15246	0.0674446	0.109256	CE1352te	Transport of 17Alpha-Hydroxypregnenolone Sulfate, Extracellular	Transport, extracellular
R_CE1401te_neg	78	1.29105	0.0310312	0.0617975	CE1401te	Transport of HomocysteineThiolactone	Transport, extracellular
R_CE1401te_pos	79	1.40996	0.0250536	0.0536924	CE1401te	Transport of HomocysteineThiolactone	Transport, extracellular
R_CE1447te_pos	69	0.96479	0.151941	0.214831	CE1447te	Transport (ATP-Dependent) into Extracellular Space	Transport, extracellular
R_CE1556td_neg	76	1.27265	0.0464515	0.0828554	CE1556td	Transport of N-Acetyl-L-Asparagine	Transport, extracellular
R_CE1556td_pos	34	-0.532827	0.260979	0.340299	CE1556td	Transport of N-Acetyl-L-Asparagine	Transport, extracellular
R_CE1617te_neg	82	1.42304	0.0124673	0.0352696	CE1617te	Transport of 9-Cis-Retinoate	Transport, extracellular
R_CE1617te_pos	84	1.46244	0.00744225	0.0264329	CE1617te	Transport of 9-Cis-Retinoate	Transport, extracellular
R_CE1918te_neg	82	1.46651	0.0124673	0.0352696	CE1918te	Transport by Oat1/Oat3 into Extracellular Space	Transport, extracellular
R_CE1918te_pos	68	0.306367	0.175411	0.24229	CE1918te	Transport by Oat1/Oat3 into Extracellular Space	Transport, extracellular
R_CE2006te_pos	71	1.05144	0.111943	0.166021	CE2006te	Transport (ATP-Dependent) into Extracellular Space	Transport, extracellular
R_CE2026te_pos	36	-0.582882	0.331162	0.414457	CE2026te	3-Methyl-Crotonyl-Glycine Transport, Extracellular	Transport, extracellular
R_CE2026tm_pos	36	-0.582882	0.331162	0.414457	CE2026tm	3-Methyl-Crotonyl-Glycine Transport, Mitochondrial	Transport, mitochondrial
R_CE2028t_pos	71	1.0029	0.111943	0.166021	CE2028t	Transport for Beta-Hydroxy-Beta-Methylbutyrate	Transport, extracellular
R_CE2047te_pos	83	1.45389	0.00969278	0.0304849	CE2047te	Transport (ATP-Dependent) into Extracellular Space	Transport, extracellular
R_CE2049te_pos	83	1.42468	0.00969278	0.0304849	CE2049te	Transport (ATP-Dependent) into Extracellular Space	Transport, extracellular
R_CE2172t_neg	75	1.28771	0.056192	0.0958446	CE2172t	Transport of 6, 7-Dihydroxy-1, 2, 3, 4-Tetrahydroisoquinoline	Transport, extracellular
R_CE2172t_pos	73	1.00012	0.0804001	0.124359	CE2172t	Transport of 6, 7-Dihydroxy-1, 2, 3, 4-Tetrahydroisoquinoline	Transport, extracellular
R_CE2176t_neg	72	1.06749	0.0951774	0.143538	CE2176t	Transport of 3-O-Methyldopa	Transport, extracellular
R_CE2176t_pos	81	1.34367	0.0158966	0.0405158	CE2176t	Transport of 3-O-Methyldopa	Transport, extracellular
R_CE2176tm_pos	78	1.26308	0.0310312	0.0617975	CE2176tm	Transport of 3-Methoxy-Tyrosine into Mitochondrial	Transport, mitochondrial
R_CE2209te_pos	73	0.932616	0.0804001	0.124359	CE2209te	Transport of 5Alpha-Androstane-3Alpha, 17Beta-Diol, Extracellular	Transport, extracellular
R_CE2211te_pos	79	1.27199	0.0250536	0.0536924	CE2211te	Transport of Allopregnanolone, Extracellular	Transport, extracellular
R_CE2445t_pos	76	1.17449	0.0464515	0.0828554	CE2445t	Transport of 6-Trans-Leukotriene B4, Active Transport	Transport, extracellular
R_CE2510ABCt_pos	77	1.05463	0.0381281	0.0718944	CE2510ABCt	Transport of 11-Cis-Eicosenoate, Active	Transport, extracellular
R_CE2510t_pos	91	1.90293	0.000797809	0.0123231	CE2510t	Transport of 11-Cis-Eicosenoate	Transport, extracellular
R_CE2512te_neg	89	1.7759	0.00164325	0.0139691	CE2512te	Ce2512Te	Transport, extracellular
R_CE2512te_pos	86	1.58551	0.0042391	0.0222853	CE2512te	Ce2512Te	Transport, extracellular
R_CE2513ATP_pos	90	1.86466	0.00115504	0.0123231	CE2513ATP	Transport of 15-Tetracosenoate, Active Transport	Transport, extracellular
R_CE2537ABCt_pos	77	1.05308	0.0381281	0.0718944	CE2537ABCt	Transport of 15-Hydroxy- (8Z, 11Z, 13E)-Eicosatrienoate, Active	Transport, extracellular
R_CE2537ATP_pos	77	1.05308	0.0381281	0.0718944	CE2537ATP	Transport of 15-Hydroxy- (8Z, 11Z, 13E)-Eicosatrienoate, Active Transport	Transport, extracellular
R_CE2705t_neg	77	1.1922	0.0381281	0.0718944	CE2705t	Transport by Ent1/Ent2 into Extracellular Space	Transport, extracellular
R_CE2705t_pos	77	1.22048	0.0381281	0.0718944	CE2705t	Transport by Ent1/Ent2 into Extracellular Space	Transport, extracellular
R_CE2934t_pos	78	1.29633	0.0310312	0.0617975	CE2934t	Transport of O-Methylhippurate, Extracellular	Transport, extracellular
R_CE4843HYDc_pos	88	1.66721	0.00228626	0.0165261	CE4843HYDc	Acylcoa Hydrolase, Cis, Cis-11, 14-Eicosadienoyl Coenzyme A	Fatty acid oxidation
R_CE4843t_pos	90	1.69497	0.00115504	0.0123231	CE4843t	Transport of Cis, Cis-11, 14-Eicosadienoyl Coenzyme A, Active Transport	Transport, extracellular
R_CE4843td_neg	90	1.69497	0.00115504	0.0123231	CE4843td	Transport of Cis, Cis-11, 14-Eicosadienoyl Coenzyme A, Diffusion	Transport, extracellular
R_CE4843td_pos	88	1.66721	0.00228626	0.0165261	CE4843td	Transport of Cis, Cis-11, 14-Eicosadienoyl Coenzyme A, Diffusion	Transport, extracellular
R_CE4877te_pos	68	1.00405	0.175411	0.24229	CE4877te	Transport (ATP-Dependent) into Extracellular Space	Transport, extracellular
R_CE4890te2_neg	69	0.866639	0.151941	0.214831	CE4890te2	Facilitated Diffusion Through Uniport Oct2 into Extracellular Space	Transport, extracellular
R_CE4890te2_pos	69	0.866639	0.151941	0.214831	CE4890te2	Facilitated Diffusion Through Uniport Oct2 into Extracellular Space	Transport, extracellular
R_CE4890te_neg	69	0.866639	0.151941	0.214831	CE4890te	Transport by Pmat Transporter into Extracellular Space	Transport, extracellular
R_CE4890te_pos	69	0.866639	0.151941	0.214831	CE4890te	Transport by Pmat Transporter into Extracellular Space	Transport, extracellular
R_CE4968te_pos	40	-0.366705	0.502727	0.581969	CE4968te	Isovalerylglycine Transport, Extracellular	Transport, extracellular
R_CE4968tm_pos	40	-0.366705	0.502727	0.581969	CE4968tm	Isovalerylglycine Transport, Mitochondrial	Transport, mitochondrial
R_CE4970te_pos	50	-0.0179559	1	1	CE4970te	2-Methylbutyrylglycine Transport, Extracellular	Transport, extracellular
R_CE4970tm_pos	50	-0.0179559	1	1	CE4970tm	2-Methylbutyrylglycine Transport, Mitochondrial	Transport, mitochondrial
R_CE5025t_pos	68	0.933043	0.175411	0.24229	CE5025t	Transport of 5-S-Glutathionyl-Dopamine	Transport, extracellular
R_CE5026t_pos	85	1.32167	0.00565611	0.0245801	CE5026t	Transport of 5-S-Glutathionyl-L-Dopa	Transport, extracellular
R_CE5072te_pos	78	1.26963	0.0310312	0.0617975	CE5072te	Transport of 21-Hydroxyallopregnanolone, Extracellular	Transport, extracellular
R_CE5304t_neg	71	1.1359	0.111943	0.166021	CE5304t	Transport of 15-Deoxy-Pgd2, Antiport with Lactate	Transport, extracellular
R_CE5304t_pos	64	1.09535	0.294725	0.375028	CE5304t	Transport of 15-Deoxy-Pgd2, Antiport with Lactate	Transport, extracellular
R_CE5629t_neg	80	1.40578	0.0200405	0.0465357	CE5629t	Transport of 6, 7-Dihydroxy-1, 2, 3, 4-Tetrahydroisoquinoline	Transport, extracellular
R_CE5629t_pos	81	1.34051	0.0158966	0.0405158	CE5629t	Transport of 6, 7-Dihydroxy-1, 2, 3, 4-Tetrahydroisoquinoline	Transport, extracellular
R_CE5643te_neg	78	1.33135	0.0310312	0.0617975	CE5643te	Peroxynitrite Diffusion, Cytosol	Transport, extracellular
R_CE6031t_neg	85	1.40719	0.00565611	0.0245801	CE6031t	Transport of Androsterone Sulfate	Transport, extracellular
R_CE6031t_pos	70	0.910339	0.130805	0.189642	CE6031t	Transport of Androsterone Sulfate	Transport, extracellular
R_CE6205te_pos	82	1.48663	0.0124673	0.0352696	CE6205te	5-Methoxytryptophol Transport, Cytosol	Transport, extracellular
R_CE6247t_pos	76	1.20466	0.0464515	0.0828554	CE6247t	Transport of 5, 12, 20-Trihete, Active Transport	Transport, extracellular
R_CE7081tm_pos	85	1.67079	0.00565611	0.0245801	CE7081tm	Transport of 15(R)-HEPE, Extracellular Space, Active Transport	Transport, extracellular
R_CE7081tr_pos	90	1.75146	0.00115504	0.0123231	CE7081tr	Transport of 15(R)-HEPE, Endoplasmatic Reticulum, Active Transport	Transport, endoplasmic reticular
R_CE7082ATP_pos	90	1.69239	0.00115504	0.0123231	CE7082ATP	Transport of 15(S)-HEPE, Active Transport	Transport, extracellular
R_CE7082UPKt_pos	90	1.69497	0.00115504	0.0123231	CE7082UPKt	Transport of 15(S)-HEPE, Diffusion	Transport, extracellular
R_CE7083t_pos	85	1.54534	0.00565611	0.0245801	CE7083t	Transport of Leukotriene B5, Active Transport	Transport, extracellular
R_CE7085te_pos	88	1.73983	0.00228626	0.0165261	CE7085te	Transport (ATP-Dependent) into Extracellular Space	Transport, extracellular
R_CE7090te_pos	85	1.60974	0.00565611	0.0245801	CE7090te	Transport (ATP-Dependent) into Extracellular Space	Transport, extracellular
R_CE7096te_pos	78	1.24232	0.0310312	0.0617975	CE7096te	Transport (ATP-Dependent) into Extracellular Space	Transport, extracellular
R_CE7172ATP_pos	90	1.69497	0.00115504	0.0123231	CE7172ATP	Transport of 14, 15-DIHETE, Active Transport	Transport, extracellular
R_CE7172UPKt_pos	90	1.69304	0.00115504	0.0123231	CE7172UPKt	Transport of 14, 15-DIHETE, Diffusion	Transport, extracellular
R_CEPTC_pos	45	-0.125285	0.766432	0.801003	CEPTC	Choline phosphotransferase	Glycerophospholipid metabolism
R_CEPTE_pos	85	1.56923	0.00565611	0.0245801	CEPTE	Ethanolamine phosphotransferase	Glycerophospholipid metabolism
R_CERK_pos	38	-0.438361	0.411896	0.496012	CERK	Ceramide kinase	Sphingolipid metabolism
R_CERT1gt_neg	79	1.23101	0.0250536	0.0536924	CERT1gt	Ceramide transport protein	Transport, golgi apparatus
R_CERT1gt_pos	82	1.34228	0.0124673	0.0352696	CERT1gt	Ceramide transport protein	Transport, golgi apparatus
R_CERT1rt_pos	83	1.43125	0.00969278	0.0304849	CERT1rt	Ceramide transport protein	Transport, endoplasmic reticular
R_CERT1tn_pos	83	1.37994	0.00969278	0.0304849	CERT1tn	Ceramide Transport Protei	Transport, nuclear
R_CERT2gt_neg	78	1.43516	0.0310312	0.0617975	CERT2gt	Ceramide transport protein	Transport, golgi apparatus
R_CERT2gt_pos	25	-0.915716	0.0674446	0.109256	CERT2gt	Ceramide transport protein	Transport, golgi apparatus
R_CERT2rt_neg	87	1.60782	0.00314361	0.0195418	CERT2rt	Ceramide transport protein	Transport, endoplasmic reticular
R_CERT2rt_pos	81	1.49817	0.0158966	0.0405158	CERT2rt	Ceramide transport protein	Transport, endoplasmic reticular
R_CGLYt3_2_pos	5	-2.28365	0.000226244	0.00830347	CGLYt3_2	Cys-Gly transport in via proton symport	Transport, extracellular
R_CGMPt_pos	78	1.10731	0.0310312	0.0617975	CGMPt	CGMP transport (ATP-dependent)	Transport, extracellular
R_CH25H_pos	77	1.25512	0.0381281	0.0718944	CH25H	Cholesterol 25-hydroxylase	Bile acid synthesis
R_CHAT_neg	76	1.28329	0.0464515	0.0828554	CHAT	Choline O-acetyltransferase	Glycerophospholipid metabolism
R_CHAT_pos	77	1.31308	0.0381281	0.0718944	CHAT	Choline O-acetyltransferase	Glycerophospholipid metabolism
R_CHLPCTD_pos	45	-0.125285	0.766432	0.801003	CHLPCTD	Choline phosphate cytididyltransferase	Glycerophospholipid metabolism
R_CHLP_pos	54	0.151758	0.766432	0.801003	CHLP	Choline phosphate phosphatase	Glycerophospholipid metabolism
R_CHLSTD78I_pos	68	0.634643	0.175411	0.24229	CHLSTD78I	5alpha-cholest-7-en-3beta-ol delta7-delta8-isomerase	Cholesterol metabolism
R_CHLSTI_1_pos	73	0.830408	0.0804001	0.124359	CHLSTI_1	Delta8,24-cholestadien-3beta-ol delta7-delta8-isomerase	Cholesterol metabolism
R_CHLtm_neg	87	1.51667	0.00314361	0.0195418	CHLtm	Choline transport via diffusion (cytosol to mitochondria)	Transport, mitochondrial
R_CHLtm_pos	81	1.31782	0.0158966	0.0405158	CHLtm	Choline transport via diffusion (cytosol to mitochondria)	Transport, mitochondrial
R_CHOLATEt2_pos	81	0.833617	0.0158966	0.0405158	CHOLATEt2	Cholate transport via sodium cotransport	Transport, extracellular
R_CHOLATEt3_pos	83	0.957508	0.00969278	0.0304849	CHOLATEt3	ABC bile acid transporter	Transport, extracellular
R_CHOLATEt_neg	81	0.833617	0.0158966	0.0405158	CHOLATEt	Cholate transport via bicarbonate countertransport	Transport, extracellular
R_CHOLATEt_pos	83	1.32229	0.00969278	0.0304849	CHOLATEt	Cholate transport via bicarbonate countertransport	Transport, extracellular
R_CHOLD2m_pos	81	1.31782	0.0158966	0.0405158	CHOLD2m	Choline dehydrogenase (FAD acceptor), mitochondrial	Glycine, serine, alanine, and threonine metabolism
R_CHOLD_pos	37	-0.287353	0.370219	0.45494	CHOLD	Choline dehydrogenase	Glycine, serine, alanine, and threonine metabolism
R_CHOLESACATc_1_pos	84	1.37799	0.00744225	0.0264329	CHOLESACATc_1	Esterification of Cholesterol to Cholesterol Ester	Cholesterol metabolism
R_CHOLESTTDe_neg	88	1.72896	0.00228626	0.0165261	CHOLESTTDe	CHOLESTTDe vesicular transport	Transport, extracellular
R_CHOLESTTDe_pos	87	1.46111	0.00314361	0.0195418	CHOLESTTDe	CHOLESTTDe vesicular transport	Transport, extracellular
R_CHOLESTle_1_pos	84	1.41418	0.00744225	0.0264329	CHOLESTle_1	Hydrolysis of Cholesterol Ester by Cholesterol Esterase	Transport, extracellular
R_CHOLK_pos	55	0.170551	0.7103	0.749568	CHOLK	Choline kinase	Glycerophospholipid metabolism
R_CHOLPtg_neg	80	1.31226	0.0200405	0.0465357	CHOLPtg	Choline phosphate intracellular transport	Transport, golgi apparatus
R_CHOLPtl_neg	85	1.48947	0.00565611	0.0245801	CHOLPtl	Choline phosphate intracellular transport	Transport, lysosomal
R_CHOLPtn_neg	82	1.28752	0.0124673	0.0352696	CHOLPtn	Choline Phosphate Intracellular Transport	Transport, nuclear
R_CHOLPtr_neg	27	-0.774601	0.0951774	0.143538	CHOLPtr	Transport of Choline Phosphate	Transport, extracellular
R_CHOLPtr_pos	50	0.0794414	1	1	CHOLPtr	Transport of Choline Phosphate	Transport, extracellular
[truncated: 11,764 more rows]

## Sheet: Sucrose+JNK_D1vsSucrose (Liver)
reaction_id	wilcoxon_statistic	cohens_d	p_value	adjusted_p_value	reaction_no_direction	reaction_name	subsytem
R_10FTHF5GLUtl_pos	27	-1.31275	0.0513444	0.0854271	10FTHF5GLUtl	5-glutamyl-10FTHF transport, lysosomal	Transport, lysosomal
R_10FTHF5GLUtm_pos	27	-1.27974	0.0513444	0.0854271	10FTHF5GLUtm	5-glutamyl-10FTHF transport, mitochondrial	Transport, mitochondrial
R_10FTHF6GLUtl_pos	32	-1.22625	0.114466	0.165831	10FTHF6GLUtl	6-glutamyl-10FTHF transport, lysosomal	Transport, lysosomal
R_10FTHF6GLUtm_pos	24	-1.29206	0.0294798	0.0541191	10FTHF6GLUtm	6-glutamyl-10FTHF transport, mitochondrial	Transport, mitochondrial
R_10FTHF7GLUtl_pos	35	-1.17533	0.173352	0.230963	10FTHF7GLUtl	7-glutamyl-10FTHF transport, lysosomal	Transport, lysosomal
R_10FTHF7GLUtm_pos	24	-1.27835	0.0294798	0.0541191	10FTHF7GLUtm	7-glutamyl-10FTHF transport, mitochondrial	Transport, mitochondrial
R_10FTHFtl_neg	27	-1.31275	0.0513444	0.0854271	10FTHFtl	10-Formyltetrahydrofolate lysosomal transport via diffusion	Transport, lysosomal
R_10FTHFtm_neg	87	1.38872	0.0241554	0.0462895	10FTHFtm	10-Formyltetrahydrofolate mitochondrial transport via diffusion	Transport, mitochondrial
R_10FTHFtm_pos	84	1.34965	0.0429637	0.0733635	10FTHFtm	10-Formyltetrahydrofolate mitochondrial transport via diffusion	Transport, mitochondrial
R_11DOCRTSLte_pos	17	-1.52927	0.00619195	0.0169998	11DOCRTSLte	Transport of 11-Deoxycortisol, Extracellular	Transport, extracellular
R_11DOCRTSLtm_pos	16	-1.49857	0.00478572	0.014183	11DOCRTSLtm	11-deoxycortisol intracellular transport	Transport, mitochondrial
R_11DOCRTSLtr_neg	14	-1.66912	0.00276143	0.0101701	11DOCRTSLtr	11-deoxycortisol intracellular transport	Transport, endoplasmic reticular
R_11DOCRTSTRNte_pos	14	-1.60674	0.00276143	0.0101701	11DOCRTSTRNte	Transport of 11-Deoxycorticosterone, Extracellular	Transport, extracellular
R_11DOCRTSTRNtm_pos	15	-1.64627	0.00365166	0.011969	11DOCRTSTRNtm	11-deoxycorticosterone intracellular transport	Transport, mitochondrial
R_11DOCRTSTRNtr_neg	16	-1.6768	0.00478572	0.014183	11DOCRTSTRNtr	11-deoxycorticosterone intracellular transport	Transport, endoplasmic reticular
R_12DHCHOLabc_pos	21	-1.12767	0.0158711	0.033564	12DHCHOLabc	12-Dehydrocholic acid ABC bile acid transporter	Transport, extracellular
R_12DHCHOLt2_pos	71	0.676007	0.28162	0.338451	12DHCHOLt2	12-Dehydrocholic acid transport via sodium cotransport	Transport, extracellular
R_12DHCHOLt_neg	71	0.676007	0.28162	0.338451	12DHCHOLt	12-Dehydrocholic acid transport via bicarbonate countertransport	Transport, extracellular
R_12DHCHOLt_pos	21	-1.12611	0.0158711	0.033564	12DHCHOLt	12-Dehydrocholic acid transport via bicarbonate countertransport	Transport, extracellular
R_12HARACHDte_pos	12	-1.75995	0.00151964	0.0075044	12HARACHDte	Transport of 12 Hydroxy Arachidonic Acid, Extracellular Space, Active Transport	Transport, extracellular
R_12HARACHDtr_pos	12	-1.75995	0.00151964	0.0075044	12HARACHDtr	Transport of 12 Hydroxy Arachidonic Acid, Endoplasmatic Reticulum, Active Transport	Transport, endoplasmic reticular
R_12HPETATP_pos	10	-1.76918	0.00078817	0.00513616	12HPETATP	Transport of 12-Hydroperoxyeicosa-5, 8, 10, 14-Tetraenoate, by FATP	Transport, extracellular
R_12HPETUPKt_pos	10	-1.76918	0.00078817	0.00513616	12HPETUPKt	Transport of 12-Hydroperoxyeicosa-5, 8, 10, 14-Tetraenoate, by Diffusion	Transport, extracellular
R_12HTACRhr_pos	12	-1.67951	0.00151964	0.0075044	12HTACRhr	Oxidation of tacrolimus in hepatocytes	Drug metabolism
R_12HTACRitr_pos	12	-1.67951	0.00151964	0.0075044	12HTACRitr	12HTACRitr	Drug metabolism
R_12HTACRtep_neg	10	-1.76918	0.00078817	0.00513616	12HTACRtep	Exit of 12-hydroxy tacrolimus into portal blood	Drug metabolism
R_12HTACRtep_pos	12	-1.67951	0.00151964	0.0075044	12HTACRtep	Exit of 12-hydroxy tacrolimus into portal blood	Drug metabolism
R_12HTACRtu_pos	10	-1.76918	0.00078817	0.00513616	12HTACRtu	Efflux of 12-hydroxy tacrolimus into intestinal lumen by ABC transporter	Drug metabolism
R_12PPDRte_neg	25	-1.42818	0.0357001	0.0633743	12PPDRte	Assumed Passive Diffusion into Extracellular Space	Transport, extracellular
R_12PPDRte_pos	10	-1.61154	0.00078817	0.00513616	12PPDRte	Assumed Passive Diffusion into Extracellular Space	Transport, extracellular
R_1331TAALThr_pos	22	-1.4718	0.0196645	0.0392806	1331TAALThr	Demethylation of 13-O-desmethyl-tacrolimus to 13,31-O-Didesmethyl-tacrolimus in hepatocytes	Drug metabolism
R_1331TACRhr_pos	22	-1.4718	0.0196645	0.0392806	1331TACRhr	Demethylation of 31-O-desmethyl-tacrolimus to 13,31-O-Didesmethyl-tacrolimus in hepatocytes	Drug metabolism
R_1331TACRteb_pos	18	-1.48711	0.00794974	0.0203633	1331TACRteb	Efflux of 13,31-O-Didesmethyl-tacrolimus into bile	Drug metabolism
R_1331TACRtev_pos	22	-1.47229	0.0196645	0.0392806	1331TACRtev	Exit of 13,31-O-Didesmethyl-tacrolimus into hepatic vein	Drug metabolism
R_13DAMPPOX_pos	17	-1.47555	0.00619195	0.0169998	13DAMPPOX	1,3-Diaminopropane:oxygen oxidoreductase (deaminating)	Beta-Alanine metabolism
R_13DAMPPte_neg	32	-0.980714	0.114466	0.165831	13DAMPPte	Facilitated Diffusion Through Uniport Octs Transporters into Extracellular Space	Transport, extracellular
R_13DAMPPte_pos	12	-1.81918	0.00151964	0.0075044	13DAMPPte	Facilitated Diffusion Through Uniport Octs Transporters into Extracellular Space	Transport, extracellular
R_13DMThr_pos	22	-1.46738	0.0196645	0.0392806	13DMThr	Demthylation of tacrolimus to 13-O-desmethyl tacrolimus in hepatocytes	Drug metabolism
R_13DMTitr_neg	22	-1.46738	0.0196645	0.0392806	13DMTitr	13DMTitr	Drug metabolism
R_13DMTitr_pos	22	-1.46738	0.0196645	0.0392806	13DMTitr	13DMTitr	Drug metabolism
R_13DMTtep_neg	10	-1.76767	0.00078817	0.00513616	13DMTtep	Exit of 13-O-desmethyl tacrolimus into portal blood	Drug metabolism
R_13DMTtep_pos	22	-1.46738	0.0196645	0.0392806	13DMTtep	Exit of 13-O-desmethyl tacrolimus into portal blood	Drug metabolism
R_13DMTtu_pos	10	-1.76918	0.00078817	0.00513616	13DMTtu	Efflux of 13-O-desmethyl tacrolimus into intestinal lumen by ABC transporter	Drug metabolism
R_13HTACRitr_pos	22	-1.47229	0.0196645	0.0392806	13HTACRitr	13HTACRitr	Drug metabolism
R_13_CIS_RETNte_neg	27	-1.36394	0.0513444	0.0854271	13_CIS_RETNte	Transport of 13-Cis-Retinoate	Transport, extracellular
R_13_CIS_RETNte_pos	11	-1.78237	0.00110004	0.00641245	13_CIS_RETNte	Transport of 13-Cis-Retinoate	Transport, extracellular
R_14HMDZALThr_pos	13	-1.67768	0.00205831	0.00867112	14HMDZALThr	Oxidation of 4-OH-midazolam to 1,4-Dihydroxy-midazolam in hepatocytes	Drug metabolism
R_14HMDZhr_pos	13	-1.67768	0.00205831	0.00867112	14HMDZhr	Oxidation of 1-OH-midazolam to 1,4-Dihydroxy-midazolam in hepatocytes	Drug metabolism
R_14HMDZitr_pos	15	-1.65468	0.00365166	0.011969	14HMDZitr	14HMDZitr	Drug metabolism
R_14MDZtev_pos	15	-1.65468	0.00365166	0.011969	14MDZtev	Efflux of 1,4-Dihydroxy-midazolam into hepatic vein	Drug metabolism
R_1513DTACRhr_pos	22	-1.4718	0.0196645	0.0392806	1513DTACRhr	Demthylation of 13-O-desmethyl tacrolimus to 13,15-O-didesmethyl tacrolimus in hepatocytes	Drug metabolism
R_1513DTALThr_pos	22	-1.4718	0.0196645	0.0392806	1513DTALThr	Demthylation of 15-O-desmethyl tacrolimus to 13,15-O-didesmethyl tacrolimus in hepatocytes	Drug metabolism
R_1513TACRitr_pos	22	-1.47229	0.0196645	0.0392806	1513TACRitr	1513TACRitr	Drug metabolism
R_1513TACRtep_neg	10	-1.76918	0.00078817	0.00513616	1513TACRtep	Exit of 13,15-O-didesmethyl tacrolimus into portal blood	Drug metabolism
R_1513TACRtep_pos	22	-1.47229	0.0196645	0.0392806	1513TACRtep	Exit of 13,15-O-didesmethyl tacrolimus into portal blood	Drug metabolism
R_1513TACRtu_pos	10	-1.76918	0.00078817	0.00513616	1513TACRtu	Efflux of 13,15-O-didesmethyl tacrolimus into intestinal lumen by ABC transporter	Drug metabolism
R_1531TACRhr_pos	22	-1.4718	0.0196645	0.0392806	1531TACRhr	Demethylation of 15-O-desmethyl tacrolimus to 15, 31-O-Didesmethyl-tacrolimus in hepatocytes	Drug metabolism
R_1531TACRitr_pos	22	-1.47229	0.0196645	0.0392806	1531TACRitr	1531TACRitr	Drug metabolism
R_1531TACRteb_pos	18	-1.48711	0.00794974	0.0203633	1531TACRteb	Efflux of 15, 31-O-Didesmethyl-tacrolimus into bile	Drug metabolism
R_1531TACRtev_pos	22	-1.47229	0.0196645	0.0392806	1531TACRtev	Exit of 15, 31-O-Didesmethyl-tacrolimus into hepatic vein	Drug metabolism
R_1531TALThr_pos	22	-1.4718	0.0196645	0.0392806	1531TALThr	Demethylation of 31-O-desmethyl tacrolimus to 15, 31-O-Didesmethyl-tacrolimus in hepatocytes	Drug metabolism
R_15DMThr_pos	22	-1.46738	0.0196645	0.0392806	15DMThr	Demethylation of tacrolimus to 15-O-desmethyl tacrolimus in hepatocytes	Drug metabolism
R_15DMTitr_neg	22	-1.46738	0.0196645	0.0392806	15DMTitr	15DMTitr	Drug metabolism
R_15DMTitr_pos	22	-1.46738	0.0196645	0.0392806	15DMTitr	15DMTitr	Drug metabolism
R_15DMTtep_neg	10	-1.76767	0.00078817	0.00513616	15DMTtep	Exit of 15-O-desmethyl tacrolimus into portal blood	Drug metabolism
R_15DMTtep_pos	22	-1.46738	0.0196645	0.0392806	15DMTtep	Exit of 15-O-desmethyl tacrolimus into portal blood	Drug metabolism
R_15DMTtu_pos	10	-1.76918	0.00078817	0.00513616	15DMTtu	Efflux of 15-O-desmethyl tacrolimus into intestinal lumen by ABC transporter	Drug metabolism
R_15HPETATP_pos	10	-1.76918	0.00078817	0.00513616	15HPETATP	Transport of 15(S)-HPETE, Active Transport	Transport, extracellular
R_15HPETUPKt_pos	10	-1.76834	0.00078817	0.00513616	15HPETUPKt	Transport of 15(S)-HPETE, Diffusion	Transport, extracellular
R_15KPROSTGF2c_neg	43	-0.535614	0.426167	0.479194	15KPROSTGF2c	Formation of 15-Keto-Prostaglandin F2A	Eicosanoid metabolism
R_15KPROSTGF2c_pos	38	-0.586115	0.251205	0.307811	15KPROSTGF2c	Formation of 15-Keto-Prostaglandin F2A	Eicosanoid metabolism
R_15KPROSTGF2t_neg	18	-1.49501	0.00794974	0.0203633	15KPROSTGF2t	Transport of 15-Keto-Prostaglandin F2A, Lactate Antiport	Transport, extracellular
R_15KPROSTGF2t_pos	32	-1.10982	0.114466	0.165831	15KPROSTGF2t	Transport of 15-Keto-Prostaglandin F2A, Lactate Antiport	Transport, extracellular
R_17AHPRGNLONEte_pos	14	-1.57038	0.00276143	0.0101701	17AHPRGNLONEte	Transport of 17Alpha-Hydroxypregnenolone, Extracellular	Transport, extracellular
R_17AHPRGSTRNte_pos	15	-1.54983	0.00365166	0.011969	17AHPRGSTRNte	Transport of 17Alpha-Hydroxyprogesterone, Extracellular	Transport, extracellular
R_18HARACHDte_pos	10	-1.75674	0.00078817	0.00513616	18HARACHDte	Transport of 18 Hydroxy Arachidonic Acid, Extracellular Space, Active Transport	Transport, extracellular
R_18HARACHDtr_pos	10	-1.75674	0.00078817	0.00513616	18HARACHDtr	Transport of 18 Hydroxy Arachidonic Acid, Endoplasmatic Reticulum, Active Transport	Transport, endoplasmic reticular
R_1A25DHVITD3te_pos	22	-1.41457	0.0196645	0.0392806	1A25DHVITD3te	Transport As Vitamin D	Transport, extracellular
R_1A25HVITD2t_neg	22	-1.51054	0.0196645	0.0392806	1A25HVITD2t	1A25HVITD2t	Transport, extracellular
R_1A25HVITD2t_pos	29	-1.10756	0.0720013	0.114535	1A25HVITD2t	1A25HVITD2t	Transport, extracellular
R_1A25HVITD2tm_neg	22	-1.51054	0.0196645	0.0392806	1A25HVITD2tm	1A25HVITD2tm	Transport, mitochondrial
R_1A25HVITD2tm_pos	29	-1.10756	0.0720013	0.114535	1A25HVITD2tm	1A25HVITD2tm	Transport, mitochondrial
R_1HIBUPGLUC_Sthv_pos	24	-1.32872	0.0294798	0.0541191	1HIBUPGLUC_Sthv	Release of 1-hydroxy S-ibuprofen-glucuronide into hepatic vein	Drug metabolism
R_1HIBUPGLUitr_pos	24	-1.32872	0.0294798	0.0541191	1HIBUPGLUitr	1HIBUPGLUitr	Drug metabolism
R_1HIBUP_SGLUhep_pos	24	-1.32872	0.0294798	0.0541191	1HIBUP_SGLUhep	Glucuronidation of 1-hydroxy ibuprofen	Drug metabolism
R_1HIBUP_Sitr_neg	31	-1.23029	0.0986176	0.146558	1HIBUP_Sitr	1HIBUP Sitr	Drug metabolism
R_1HIBUP_Sitr_pos	13	-1.66017	0.00205831	0.00867112	1HIBUP_Sitr	1HIBUP Sitr	Drug metabolism
R_1HIBUP_Sthv_neg	31	-1.23029	0.0986176	0.146558	1HIBUP_Sthv	Release of 1-hydroxy-ibuprofen into hepatic vein	Drug metabolism
R_1HIBUP_Sthv_pos	13	-1.66017	0.00205831	0.00867112	1HIBUP_Sthv	Release of 1-hydroxy-ibuprofen into hepatic vein	Drug metabolism
R_1HMDGLUChr_pos	23	-1.35085	0.0241554	0.0462895	1HMDGLUChr	Glucuronidation of 1-OH-midazolam in enterocytes	Drug metabolism
R_1HMDGLUCitr_pos	23	-1.35085	0.0241554	0.0462895	1HMDGLUCitr	1HMDGLUCitr	Drug metabolism
R_1HMDZGLUChc_neg	23	-1.35085	0.0241554	0.0462895	1HMDZGLUChc	Uptake of 1-OH-midazolam-glucuronide into hepatocytes	Drug metabolism
R_1MNCAMt_neg	18	-1.47978	0.00794974	0.0203633	1MNCAMt	Transport of 1-Methylnicotinamide	Transport, extracellular
R_1MNCAMt_pos	10	-1.76918	0.00078817	0.00513616	1MNCAMt	Transport of 1-Methylnicotinamide	Transport, extracellular
R_1MNCAMti_pos	10	-1.76918	0.00078817	0.00513616	1MNCAMti	N1-Methylnicotinamide transport	Transport, extracellular
R_1OHMDZhr_pos	12	-1.67951	0.00151964	0.0075044	1OHMDZhr	Oxidation of midazolam to 1-OH-midazolam in hepatocytes	Drug metabolism
R_1OHMDZitr_neg	17	-1.59308	0.00619195	0.0169998	1OHMDZitr	1OHMDZitr	Drug metabolism
R_1OHMDZitr_pos	12	-1.67951	0.00151964	0.0075044	1OHMDZitr	1OHMDZitr	Drug metabolism
R_1OHMDZtep_neg	17	-1.59308	0.00619195	0.0169998	1OHMDZtep	Efflux of 1-OH-midazolam into portal blood	Drug metabolism
R_1OHMDZtep_pos	12	-1.67951	0.00151964	0.0075044	1OHMDZtep	Efflux of 1-OH-midazolam into portal blood	Drug metabolism
R_1PPDCRp_pos	28	-1.17234	0.0610009	0.0998401	1PPDCRp	Delta1-piperideine-2-carboxylate reductase, perixosomal	Lysine metabolism
R_1a25DHVITD3TRn_pos	7	-2.00065	0.000255163	0.00327288	1a25DHVITD3TRn	Tanslocation of 1-alpha,25-Dihydroxyvitamin D3 to nucleus	Transport, nuclear
R_1a_24_25VITD2Hm_pos	12	-1.7405	0.00151964	0.0075044	1a_24_25VITD2Hm	1-alpha-Vitamin D-24,25-hydroxylase (D2)	Vitamin D metabolism
R_1a_25VITD2Hm_pos	18	-1.5418	0.00794974	0.0203633	1a_25VITD2Hm	1-alpha,24R,25-Vitamin D-hydroxylase (D2)	Vitamin D metabolism
R_21HPRGNLONE_pos	15	-1.64355	0.00365166	0.011969	21HPRGNLONE	Formation of 21-Hydroxypregnenolone	Steroid metabolism
R_21HPRGNLONEt1_pos	10	-1.76918	0.00078817	0.00513616	21HPRGNLONEt1	Transport of 21-Hydroxypregnenolone, Active Transport	Transport, extracellular
R_21HPRGNLONEt2_neg	10	-1.76918	0.00078817	0.00513616	21HPRGNLONEt2	Transport of 21-Hydroxypregnenolone, Diffusion	Transport, extracellular
R_21HPRGNLONEt2_pos	15	-1.64355	0.00365166	0.011969	21HPRGNLONEt2	Transport of 21-Hydroxypregnenolone, Diffusion	Transport, extracellular
R_24NPHte_neg	19	-1.42187	0.0100931	0.0241208	24NPHte	Xenobiotic transport	Transport, extracellular
R_24_25DHVITD2t_pos	22	-1.51809	0.0196645	0.0392806	24_25DHVITD2t	24,25-Dihydroxyvitamin D2 transport from cytoplasm	Transport, extracellular
R_24_25DHVITD2tm_pos	22	-1.51809	0.0196645	0.0392806	24_25DHVITD2tm	24,25-Dihydroxyvitamin D2 transport from mitochondria	Transport, mitochondrial
R_24_25DHVITD3t_pos	4	-2.20806	6.80434e-05	0.00160907	24_25DHVITD3t	24,25-Dihydroxyvitamin D3 transport from cytoplasm	Transport, extracellular
R_24_25DHVITD3tm_pos	6	-2.08819	0.000170109	0.00267261	24_25DHVITD3tm	24,25-Dihydroxyvitamin D3 transport from mitochondria	Transport, mitochondrial
R_24_25VITD2Hm_pos	22	-1.51809	0.0196645	0.0392806	24_25VITD2Hm	24R-Vitamin D-25-hydroxylase (D2)	Vitamin D metabolism
R_24_25VITD3Hm_pos	6	-2.08819	0.000170109	0.00267261	24_25VITD3Hm	24R-Vitamin D-25-hydroxylase (D3)	Vitamin D metabolism
R_25HVITD2tin_m_pos	29	-1.13252	0.0720013	0.114535	25HVITD2tin_m	25-hydroxyvitamin D2 transport in mitochondria	Transport, mitochondrial
R_25HVITD3c_pos	6	-2.10922	0.000170109	0.00267261	25HVITD3c	1-alpha hydroxylation of 25-hydroxy vitamin D	Vitamin D metabolism
R_25HVITD3t_pos	4	-2.4694	6.80434e-05	0.00160907	25HVITD3t	25-hydroxyvitamin D3 transport from cytoplasm	Transport, extracellular
R_25HVITD3tin_m_pos	8	-1.9857	0.000379909	0.00406902	25HVITD3tin_m	25-hydroxyvitamin D3 transport in mitochondria	Transport, mitochondrial
R_25VITD2Hm_pos	29	-1.10756	0.0720013	0.114535	25VITD2Hm	1-alpha-Vitamin D-25-hydroxylase (D2)	Vitamin D metabolism
R_25VITD3Hm_pos	8	-1.97397	0.000379909	0.00406902	25VITD3Hm	1-alpha-Vitamin D-25-hydroxylase (D3)	Vitamin D metabolism
R_2AMACHYD_pos	60	0.225656	0.756444	0.785613	2AMACHYD	2-Aminoacrylate hydrolysis	Glycine, serine, alanine, and threonine metabolism
R_2AMACSULT_pos	13	-1.42695	0.00205831	0.00867112	2AMACSULT	2-Aminoacrylate sulfotransferase	Methionine and cysteine metabolism
R_2AMADPTm_pos	46	-0.568669	0.557264	0.599564	2AMADPTm	L-2-aminoadipate shuttle (cytosol/mitochondria)	Lysine metabolism
R_2DR1PP_pos	28	-0.774209	0.0610009	0.0998401	2DR1PP	2-deoxy-D-ribose 1-phosphate phosphorylase	Pyrimidine catabolism
R_2H3MVc_neg	21	-1.38975	0.0158711	0.033564	2H3MVc	Formation of 2-Hydroxy-3-Methyl-Valerate	Valine, leucine, and isoleucine metabolism
R_2H3MVc_pos	64	0.268151	0.557264	0.599564	2H3MVc	Formation of 2-Hydroxy-3-Methyl-Valerate	Valine, leucine, and isoleucine metabolism
R_2H3MVte_neg	21	-1.38975	0.0158711	0.033564	2H3MVte	Transport of 2-Hydroxy-3-Methyl-Valerate	Transport, extracellular
R_2H3MVte_pos	64	0.268151	0.557264	0.599564	2H3MVte	Transport of 2-Hydroxy-3-Methyl-Valerate	Transport, extracellular
R_2HATVACIDGLUChr_pos	9	-1.91279	0.000550018	0.00467566	2HATVACIDGLUChr	Glucuronidation of 2-hydroxy-atorvastatin-acid in hepatocytes	Drug metabolism
R_2HATVACIDGLUCitr_pos	9	-1.91279	0.000550018	0.00467566	2HATVACIDGLUCitr	2HATVACIDGLUCitr	Drug metabolism
R_2HATVACIDGLUCteb_pos	9	-1.91279	0.000550018	0.00467566	2HATVACIDGLUCteb	Efflux of 2-hydroxy-atorvastatin-acyl-glucuronide into bile	Drug metabolism
R_2HATVACIDOXDhc_pos	8	-1.84066	0.000379909	0.00406902	2HATVACIDOXDhc	Oxidation of atorvastatin acid to 2-hydroxy-atorvastatin-acid in hepatocytes	Drug metabolism
R_2HATVACIDhc_pos	26	-1.14756	0.0429637	0.0733635	2HATVACIDhc	Conversion of 2-hydroxy-atorvastatin-lactone to its acid form in hepatocytes	Drug metabolism
R_2HATVACIDitr_neg	14	-1.68734	0.00276143	0.0101701	2HATVACIDitr	2HATVACIDitr	Drug metabolism
R_2HATVACIDitr_pos	8	-1.84066	0.000379909	0.00406902	2HATVACIDitr	2HATVACIDitr	Drug metabolism
R_2HATVACIDteb_pos	29	-0.657543	0.0720013	0.114535	2HATVACIDteb	Efflux of 2-hydroxy-atorvastatin-acid into bile	Drug metabolism
R_2HATVACIDtep_neg	10	-1.48717	0.00078817	0.00513616	2HATVACIDtep	Efflux of 2-hydroxy-atorvastatin-acid into portal blood	Drug metabolism
R_2HATVACIDtep_pos	20	-1.34646	0.0127184	0.0283932	2HATVACIDtep	Efflux of 2-hydroxy-atorvastatin-acid into portal blood	Drug metabolism
R_2HATVACIDthc_neg	10	-1.48717	0.00078817	0.00513616	2HATVACIDthc	Uptake of 2-hydroxy-atorvastatin-acid into hepatocytes	Drug metabolism
R_2HATVACIDthc_pos	20	-1.34646	0.0127184	0.0283932	2HATVACIDthc	Uptake of 2-hydroxy-atorvastatin-acid into hepatocytes	Drug metabolism
R_2HATVLACGLUChr_pos	9	-1.95353	0.000550018	0.00467566	2HATVLACGLUChr	Glucuronidation of 2-hydroxy-atorvastatin-lactone in hepatocytes	Drug metabolism
R_2HATVLACGLUCitr_pos	9	-1.95353	0.000550018	0.00467566	2HATVLACGLUCitr	2HATVLACGLUCitr	Drug metabolism
R_2HATVLACGLUCteb_pos	9	-1.95353	0.000550018	0.00467566	2HATVLACGLUCteb	Efflux of 2-hydroxy-atorvastatin-lactone-glucuronide into bile	Drug metabolism
R_2HATVLACOXDhc_pos	9	-1.95353	0.000550018	0.00467566	2HATVLACOXDhc	Oxidation of atorvastatin lactone to 2-hydroxy-atorvastatin-lactone in hepatocytes	Drug metabolism
R_2HATVLAChc_pos	26	-1.14804	0.0429637	0.0733635	2HATVLAChc	Conversion of 2-hydroxy-atorvastatin-acid to its lactone form in hepatocytes	Drug metabolism
R_2HATVLACteb_pos	29	-0.657543	0.0720013	0.114535	2HATVLACteb	Efflux of 2-hydroxy-atorvastatin-lactone into bile	Drug metabolism
R_2HATVLACtep_neg	10	-1.48717	0.00078817	0.00513616	2HATVLACtep	Efflux of 2-hydroxy-atorvastatin-lactone into portal blood	Drug metabolism
R_2HATVLACtep_pos	20	-1.34646	0.0127184	0.0283932	2HATVLACtep	Efflux of 2-hydroxy-atorvastatin-lactone into portal blood	Drug metabolism
R_2HATVLACthc_neg	10	-1.48717	0.00078817	0.00513616	2HATVLACthc	Uptake of 2-hydroxy-atorvastatin-lactone into hepatocytes	Drug metabolism
R_2HATVLACthc_pos	20	-1.34646	0.0127184	0.0283932	2HATVLACthc	Uptake of 2-hydroxy-atorvastatin-lactone into hepatocytes	Drug metabolism
R_2HBO_neg	26	-1.17313	0.0429637	0.0733635	2HBO	2 HydroxybutyrateNAD oxidoreductase	Propanoate metabolism
R_2HBO_pos	19	-1.56216	0.0100931	0.0241208	2HBO	2 HydroxybutyrateNAD oxidoreductase	Propanoate metabolism
R_2HBt2_neg	85	1.18514	0.0357001	0.0633743	2HBt2	2 hydroxybutyrate cotransport with proton	Transport, extracellular
R_2HBt2_pos	85	1.18514	0.0357001	0.0633743	2HBt2	2 hydroxybutyrate cotransport with proton	Transport, extracellular
R_2HCO3_NAt_neg	85	1.12051	0.0357001	0.0633743	2HCO3_NAt	Bicarbonate transport (Na/HCO3 1:2 cotransport)	Transport, extracellular
R_2HCO3_NAt_pos	89	1.274	0.0158711	0.033564	2HCO3_NAt	Bicarbonate transport (Na/HCO3 1:2 cotransport)	Transport, extracellular
R_2HIBUPGLUC_Sitr_pos	24	-1.32523	0.0294798	0.0541191	2HIBUPGLUC_Sitr	2HIBUPGLUC Sitr	Drug metabolism
R_2HIBUPGLUC_Sthv_pos	24	-1.32523	0.0294798	0.0541191	2HIBUPGLUC_Sthv	Release of 2-hydroxy S-ibuprofen-glucuronide into hepatic vein	Drug metabolism
R_2HIBUP_Ritr_pos	15	-1.62332	0.00365166	0.011969	2HIBUP_Ritr	2HIBUP Ritr	Drug metabolism
R_2HIBUP_Rthv_pos	15	-1.62332	0.00365166	0.011969	2HIBUP_Rthv	Release of R-2-hydroxy-ibuprofen into hepatic vein	Drug metabolism
R_2HIBUP_SGLUhep_pos	24	-1.32523	0.0294798	0.0541191	2HIBUP_SGLUhep	Glucuronidation of S-2-hydroxy ibuprofen	Drug metabolism
R_2HIBUP_Sitr_neg	31	-1.23029	0.0986176	0.146558	2HIBUP_Sitr	2HIBUP Sitr	Drug metabolism
R_2HIBUP_Sitr_pos	13	-1.68916	0.00205831	0.00867112	2HIBUP_Sitr	2HIBUP Sitr	Drug metabolism
R_2HIBUP_Sthv_neg	31	-1.23029	0.0986176	0.146558	2HIBUP_Sthv	Release of S-2-hydroxy-ibuprofen into hepatic vein	Drug metabolism
R_2HIBUP_Sthv_pos	13	-1.68916	0.00205831	0.00867112	2HIBUP_Sthv	Release of S-2-hydroxy-ibuprofen into hepatic vein	Drug metabolism
R_2HIVc_neg	21	-1.38975	0.0158711	0.033564	2HIVc	Formation of 2-Hydroxy-Isovalerate	Valine, leucine, and isoleucine metabolism
R_2HIVc_pos	70	0.47124	0.314372	0.369235	2HIVc	Formation of 2-Hydroxy-Isovalerate	Valine, leucine, and isoleucine metabolism
R_2HIVte_neg	21	-1.38975	0.0158711	0.033564	2HIVte	Transport of 2-Hydroxy-Isovalerate	Transport, extracellular
R_2HIVte_pos	70	0.47124	0.314372	0.369235	2HIVte	Transport of 2-Hydroxy-Isovalerate	Transport, extracellular
R_2HYDOGOAT3t_neg	62	0.618098	0.653903	0.692175	2HYDOGOAT3t	Transport of 2-Hydroxy-Glutarate, Extracellular, Antiport	Transport, extracellular
R_2HYDOGte_pos	62	0.618098	0.653903	0.692175	2HYDOGte	Transport of 2-Hydroxy-Glutarate, Extracellular	Transport, extracellular
R_2HYOXPLCte_pos	17	-1.52487	0.00619195	0.0169998	2HYOXPLCte	2-Hydroxyphenylacetate Proton Symport, Cytosol	Transport, extracellular
R_2M3HBUc_pos	25	-1.12692	0.0357001	0.0633743	2M3HBUc	Formation of 2-Methyl-3-Hydroxy-Butyrate	Valine, leucine, and isoleucine metabolism
R_2M3HBUte_pos	25	-1.12692	0.0357001	0.0633743	2M3HBUte	Transport of 2-Methyl-3-Hydroxy-Butyrate, Extracellular	Transport, extracellular
R_2M3HBUtm_pos	25	-1.12692	0.0357001	0.0633743	2M3HBUtm	Transport of 2-Methyl-3-Hydroxy-Butyrate, Mitochondrial	Transport, mitochondrial
R_2M3HVACc_pos	28	-0.916308	0.0610009	0.0998401	2M3HVACc	Formation of 2-Methyl-3-Hydroxy-Valerate	Propanoate metabolism
R_2M3HVACte_pos	28	-0.916308	0.0610009	0.0998401	2M3HVACte	Transport of 2-Methyl-3-Hydroxy-Valerate	Transport, extracellular
R_2M3OVACm_pos	28	-0.916308	0.0610009	0.0998401	2M3OVACm	Formation of 2-Methyl-3-Oxo-Valerate	Propanoate metabolism
R_2M3OVACtm_pos	28	-0.916308	0.0610009	0.0998401	2M3OVACtm	Transport of 2-Methyl-3-Oxo-Valerate, Mitochondrial	Transport, mitochondrial
R_2M3OVCOAm_pos	28	-0.916308	0.0610009	0.0998401	2M3OVCOAm	Formation of 2-Methyl-3-Oxo-Valeryl Coa	Propanoate metabolism
R_2MB2COAc_pos	6	-1.98255	0.000170109	0.00267261	2MB2COAc	Transport of 2-methylcrotonoyl-CoA into cytosol	Fatty acid oxidation
R_2MCITt_pos	39	-0.613929	0.28162	0.338451	2MCITt	2-methylcitrate transport via diffusion	Transport, extracellular
R_2MOPtm_pos	21	-1.37934	0.0158711	0.033564	2MOPtm	Transport of 2-Methyl-3-Oxopropanoate, Mitochondrial	Transport, mitochondrial
R_2OBUTt_neg	29	-0.96045	0.0720013	0.114535	2OBUTt	Transport by Monocarboxylate Transporter-2 into Extracellular Space	Transport, extracellular
R_2OBUTt_pos	17	-1.5473	0.00619195	0.0169998	2OBUTt	Transport by Monocarboxylate Transporter-2 into Extracellular Space	Transport, extracellular
R_2OXOADOXm_pos	60	-0.314224	0.756444	0.785613	2OXOADOXm	2-Oxoadipate:lipoamde 2-oxidoreductase(decarboxylating and acceptor-succinylating) (mitochondria)	Lysine metabolism
R_2OXOADPTm_neg	46	-0.570435	0.557264	0.599564	2OXOADPTm	2-oxoadipate shuttle (cytosol/mitochondria)	Tryptophan metabolism
R_2OXOADPTm_pos	10	-1.83431	0.00078817	0.00513616	2OXOADPTm	2-oxoadipate shuttle (cytosol/mitochondria)	Tryptophan metabolism
R_2OXOADPt_neg	21	-1.50874	0.0158711	0.033564	2OXOADPt	Transport of 2-Oxoadipate by Alpha-Ketoglutarate Antiport	Transport, extracellular
R_2OXOADPt_pos	38	-0.752736	0.251205	0.307811	2OXOADPt	Transport of 2-Oxoadipate by Alpha-Ketoglutarate Antiport	Transport, extracellular
R_2PGtr_neg	20	-1.35056	0.0127184	0.0283932	2PGtr	Transport of 2-Phospho-D-Glycerate	Transport, extracellular
R_2PGtr_pos	21	-1.48195	0.0158711	0.033564	2PGtr	Transport of 2-Phospho-D-Glycerate	Transport, extracellular
R_31DMThr_pos	22	-1.46738	0.0196645	0.0392806	31DMThr	Demethylation of tacrolimus to 31-O-desmethyl tacrolimus in hepatocytes	Drug metabolism
R_31DMTitr_neg	22	-1.46738	0.0196645	0.0392806	31DMTitr	31DMTitr	Drug metabolism
R_31DMTitr_pos	22	-1.46738	0.0196645	0.0392806	31DMTitr	31DMTitr	Drug metabolism
R_31DMTtep_neg	10	-1.76767	0.00078817	0.00513616	31DMTtep	Exit of 31-O-desmethyl tacrolimus into portal blood	Drug metabolism
R_31DMTtep_pos	22	-1.46738	0.0196645	0.0392806	31DMTtep	Exit of 31-O-desmethyl tacrolimus into portal blood	Drug metabolism
R_31DMTtu_pos	10	-1.76918	0.00078817	0.00513616	31DMTtu	Efflux of 31-O-desmethyl tacrolimus into intestinal lumen by ABC transporter	Drug metabolism
R_34DHALDD_pos	94	1.29563	0.00478572	0.014183	34DHALDD	Aldehyde dehydrogenase 3 4 dihydroxyphenylacetaldehyde NAD	Tyrosine metabolism
R_34DHOXMANDte_neg	42	-0.383457	0.386679	0.441319	34DHOXMANDte	3, 4-Dihydroxymandelate Transport, Cytosol	Transport, extracellular
R_34DHOXMANDte_pos	27	-1.01435	0.0513444	0.0854271	34DHOXMANDte	3, 4-Dihydroxymandelate Transport, Cytosol	Transport, extracellular
R_34DHOXPEGOX_neg	42	-0.152423	0.386679	0.441319	34DHOXPEGOX	3,4-Dihydroxyphenylethyleneglycol NAD+ oxidoreductase	Tyrosine metabolism
R_34DHOXPEGOX_pos	17	-1.43364	0.00619195	0.0169998	34DHOXPEGOX	3,4-Dihydroxyphenylethyleneglycol NAD+ oxidoreductase	Tyrosine metabolism
R_34DHOXPEGt_neg	42	-0.152423	0.386679	0.441319	34DHOXPEGt	3,4-Dihydroxyphenylethyleneglycol transport (diffusion)	Transport, extracellular
R_34DHOXPEGt_pos	17	-1.43364	0.00619195	0.0169998	34DHOXPEGt	3,4-Dihydroxyphenylethyleneglycol transport (diffusion)	Transport, extracellular
R_34DHPEAR_pos	8	-1.78211	0.000379909	0.00406902	34DHPEAR	3, 4-Dihydroxyphenylethanol:NADP+ Reductase	Tyrosine metabolism
R_34DHPEt_neg	8	-1.78211	0.000379909	0.00406902	34DHPEt	Transport of 3, 4-Dihydroxyphenylethanol via Passive Diffusion	Transport, extracellular
R_34DHPHAMT_pos	17	-1.35629	0.00619195	0.0169998	34DHPHAMT	3,4-Dihydroxyphenylacetate:amet O-methyltransferase	Tyrosine metabolism
R_34DHPHAte_neg	76	0.859436	0.151737	0.207652	34DHPHAte	(3, 4-Dihydroxyphenyl)Acetate (Dopac) Transport, Cytosol	Transport, extracellular
R_34DHPHAte_pos	21	-1.21883	0.0158711	0.033564	34DHPHAte	(3, 4-Dihydroxyphenyl)Acetate (Dopac) Transport, Cytosol	Transport, extracellular
R_34DHPHELAT1tc_pos	66	0.219767	0.467855	0.519407	34DHPHELAT1tc	Transport of 3,4-Dihydroxy-L-phenylalanine by LAT1 in association with 4F2hc, across the apical surface of the memebranes.	Transport, extracellular
R_34DHPHEt_neg	66	0.219767	0.467855	0.519407	34DHPHEt	3,4-Dihydroxy-L-phenylalanine transport	Transport, extracellular
R_34DHPHEt_pos	0	-2.01063	5.67028e-06	0.00109147	34DHPHEt	3,4-Dihydroxy-L-phenylalanine transport	Transport, extracellular
R_34DHPLACOX_NADP_neg	94	1.29563	0.00478572	0.014183	34DHPLACOX_NADP	34DHPLACOX LPAREN NADP RPAREN	Tyrosine metabolism
R_34DHPLACOX_NADP_pos	31	-0.868909	0.0986176	0.146558	34DHPLACOX_NADP	34DHPLACOX LPAREN NADP RPAREN	Tyrosine metabolism
R_34DHXMANDACOX_NADP_neg	91	1.25044	0.0100931	0.0241208	34DHXMANDACOX_NADP	3,4-Dihydroxymandelaldehyde:NADP+ oxidoreductase	Tyrosine metabolism
R_34DHXMANDACOX_NADP_pos	33	-0.775574	0.132118	0.185317	34DHXMANDACOX_NADP	3,4-Dihydroxymandelaldehyde:NADP+ oxidoreductase	Tyrosine metabolism
R_34DHXMANDACOX_pos	91	1.25044	0.0100931	0.0241208	34DHXMANDACOX	3,4-Dihydroxymandelaldehyde:NAD+ oxidoreductase	Tyrosine metabolism
R_34HPLFM_pos	31	-0.978562	0.0986176	0.146558	34HPLFM	3 4 hydroxyphenyl lactate formation	Ubiquinone synthesis
R_34HPLte_neg	11	-1.4267	0.00110004	0.00641245	34HPLte	Transport of 3- (4-Hydroxyphenyl)Lactate	Transport, extracellular
R_34HPLte_pos	42	-0.61927	0.386679	0.441319	34HPLte	Transport of 3- (4-Hydroxyphenyl)Lactate	Transport, extracellular
R_34HPLtm_neg	30	-1.004	0.0845213	0.129511	34HPLtm	Transport of 3-(4-Hydroxyphenyl)Lactate, Mitochondrial	Transport, mitochondrial
R_34HPLtm_pos	26	-0.902802	0.0429637	0.0733635	34HPLtm	Transport of 3-(4-Hydroxyphenyl)Lactate, Mitochondrial	Transport, mitochondrial
R_34HPPOR_pos	16	-1.57748	0.00478572	0.014183	34HPPOR	4 Hydroxyphenylpyruvateoxygen oxidoreductase	Tyrosine metabolism
R_34HPPte_neg	44	-0.366147	0.467855	0.519407	34HPPte	Transport of 3-(4-hydroxyphenyl)pyruvate	Transport, extracellular
R_34HPPte_pos	21	-1.48253	0.0158711	0.033564	34HPPte	Transport of 3-(4-hydroxyphenyl)pyruvate	Transport, extracellular
R_35CGMPtn_pos	49	-0.27177	0.704504	0.739934	35CGMPtn	35cGMP nuclear transport	Transport, nuclear
R_35DHPVShc_pos	14	-1.65349	0.00276143	0.0101701	35DHPVShc	Conversion of pravastatin to 3-alpha-5-beta-dihydroxy pravastatin in entercoytes	Drug metabolism
R_35DHPVSitr_pos	14	-1.65349	0.00276143	0.0101701	35DHPVSitr	35DHPVSitr	Drug metabolism
R_35DHPVStep_neg	10	-1.48717	0.00078817	0.00513616	35DHPVStep	3-alpha-5-beta-dihydroxy pravastatin exit into portal blood	Drug metabolism
R_35DHPVStep_pos	20	-1.34646	0.0127184	0.0283932	35DHPVStep	3-alpha-5-beta-dihydroxy pravastatin exit into portal blood	Drug metabolism
R_35DHPVSthc_neg	10	-1.48717	0.00078817	0.00513616	35DHPVSthc	Uptake of 3-alpha-5-beta-dihydroxy pravastatin by hepatocytes	Drug metabolism
R_35DHPVSthc_pos	20	-1.34646	0.0127184	0.0283932	35DHPVSthc	Uptake of 3-alpha-5-beta-dihydroxy pravastatin by hepatocytes	Drug metabolism
R_35DIODTYRte_neg	12	-1.55526	0.00151964	0.0075044	35DIODTYRte	Transport of 3, 5-Diiodo-L-Tyrosine	Transport, extracellular
R_35DIODTYRte_pos	38	-0.983624	0.251205	0.307811	35DIODTYRte	Transport of 3, 5-Diiodo-L-Tyrosine	Transport, extracellular
R_35DSMVhep_pos	12	-1.7263	0.00151964	0.0075044	35DSMVhep	Formation of 3,5-dihydrodoil simvastatin	Drug metabolism
R_35DSMVitr_pos	12	-1.7263	0.00151964	0.0075044	35DSMVitr	35DSMVitr	Drug metabolism
R_35DSMVteb_pos	12	-1.7263	0.00151964	0.0075044	35DSMVteb	Efflux of 3,5-dihydrodiol-simvastatin-lactone form into bile	Drug metabolism
R_3AIBSYMPt_neg	10	-1.69192	0.00078817	0.00513616	3AIBSYMPt	3-Amino-Isobutyrate Transport, Sodium Symport	Transport, extracellular
R_3AIBSYMPt_pos	16	-1.61131	0.00478572	0.014183	3AIBSYMPt	3-Amino-Isobutyrate Transport, Sodium Symport	Transport, extracellular
R_3AIBTm_pos	18	-1.39641	0.00794974	0.0203633	3AIBTm	L-3-aminoisobutyrate transaminase, mitochondrial	Valine, leucine, and isoleucine metabolism
R_3AIB_Dtm_neg	15	-1.5658	0.00365166	0.011969	3AIB_Dtm	Transport of 3aib D into mitochondria	Transport, mitochondrial
R_3AIB_Dtm_pos	41	-0.497501	0.349369	0.403217	3AIB_Dtm	Transport of 3aib D into mitochondria	Transport, mitochondrial
R_3AIBt1_neg	16	-1.61131	0.00478572	0.014183	3AIBt1	3-Amino-Isobutyrate Transport, Proton Symport	Transport, extracellular
R_3AIBt1_pos	22	-1.38575	0.0196645	0.0392806	3AIBt1	3-Amino-Isobutyrate Transport, Proton Symport	Transport, extracellular
R_3AIBt_pos	30	-1.16363	0.0845213	0.129511	3AIBt	3-amino-isobutyrate transport	Transport, extracellular
R_3AIBtm_pos	18	-1.39641	0.00794974	0.0203633	3AIBtm	3-amino-isobutyrate transport, mitochondrial	Transport, mitochondrial
R_3ANTHRNtr_neg	18	-1.54157	0.00794974	0.0203633	3ANTHRNtr	Transport of 3-Hydroxyanthranilate	Transport, extracellular
R_3ANTHRNtr_pos	15	-1.59735	0.00365166	0.011969	3ANTHRNtr	Transport of 3-Hydroxyanthranilate	Transport, extracellular
R_3DHCAS_pos	15	-1.63221	0.00365166	0.011969	3DHCAS	3-dehydrocholic acid formation	Bile acid synthesis
R_3DHCDCAS_pos	17	-1.55595	0.00619195	0.0169998	3DHCDCAS	3-dehydro-chenodehydroxycholic acid formation	Bile acid synthesis
R_3DHCDCHOLabc_pos	21	-1.12767	0.0158711	0.033564	3DHCDCHOLabc	3-Dehydrochenodeoxycholic acid ABC bile acid transporter	Transport, extracellular
R_3DHCDCHOLt2_pos	71	0.676007	0.28162	0.338451	3DHCDCHOLt2	3-Dehydrochenodeoxycholic acid transport via sodium cotransport	Transport, extracellular
R_3DHCDCHOLt_neg	71	0.676007	0.28162	0.338451	3DHCDCHOLt	3-Dehydrochenodeoxycholic acid transport via bicarbonate countertransport	Transport, extracellular
R_3DHCDCHOLt_pos	21	-1.12611	0.0158711	0.033564	3DHCDCHOLt	3-Dehydrochenodeoxycholic acid transport via bicarbonate countertransport	Transport, extracellular
R_3DHCHOLabc_pos	21	-1.12767	0.0158711	0.033564	3DHCHOLabc	3-Dehydrocholic acid ABC bile acid transporter	Transport, extracellular
R_3DHCHOLt2_pos	71	0.676007	0.28162	0.338451	3DHCHOLt2	3-Dehydrocholic acid transport via sodium cotransport	Transport, extracellular
R_3DHCHOLt_neg	71	0.676007	0.28162	0.338451	3DHCHOLt	3-Dehydrocholic acid transport via bicarbonate countertransport	Transport, extracellular
R_3DHCHOLt_pos	21	-1.12611	0.0158711	0.033564	3DHCHOLt	3-Dehydrocholic acid transport via bicarbonate countertransport	Transport, extracellular
R_3DHDCAS_pos	14	-1.59965	0.00276143	0.0101701	3DHDCAS	3-dehydro-deoxycholic acid formation	Bile acid synthesis
R_3DHDCAabc_pos	21	-1.12801	0.0158711	0.033564	3DHDCAabc	3-dehydro-deoxycholic acid ABC bile acid transporter	Transport, extracellular
R_3DHDCAt2_pos	71	0.676007	0.28162	0.338451	3DHDCAt2	3-dehydro-deoxycholic acid transport via sodium cotransport	Transport, extracellular
R_3DHDCAt_neg	71	0.676007	0.28162	0.338451	3DHDCAt	3-dehydro-deoxycholic acid transport via bicarbonate countertransport	Transport, extracellular
R_3DHDCAt_pos	21	-1.12645	0.0158711	0.033564	3DHDCAt	3-dehydro-deoxycholic acid transport via bicarbonate countertransport	Transport, extracellular
R_3DHLCAS_pos	20	-1.51288	0.0127184	0.0283932	3DHLCAS	3-dehydro-lithocholic acid formation	Bile acid synthesis
R_3DHLCAabc_pos	21	-1.12801	0.0158711	0.033564	3DHLCAabc	3-dehydro-lithocholic acid ABC bile acid transporter	Transport, extracellular
R_3DHLCAt2_pos	71	0.676007	0.28162	0.338451	3DHLCAt2	3-dehydro-lithocholic acid transport via sodium cotransport	Transport, extracellular
R_3DHLCAt_neg	71	0.676007	0.28162	0.338451	3DHLCAt	3-dehydro-lithocholic acid transport via bicarbonate countertransport	Transport, extracellular
R_3DHLCAt_pos	21	-1.12645	0.0158711	0.033564	3DHLCAt	3-dehydro-lithocholic acid transport via bicarbonate countertransport	Transport, extracellular
R_3DPHBH1_pos	43	-0.422909	0.426167	0.479194	3DPHBH1	Hydroxylation of 3-Decaprenyl-4-hydroxybenzoate (NADH)	Ubiquinone synthesis
R_3DPHBH2_pos	43	-0.424328	0.426167	0.479194	3DPHBH2	Hydroxylation of 3-Decaprenyl-4-hydroxybenzoate (NADPH)	Ubiquinone synthesis
R_3DSPHR_pos	44	-0.270209	0.467855	0.519407	3DSPHR	3 Dehydrosphinganine reductase	Sphingolipid metabolism
R_3H3MGLTc_pos	26	-1.07156	0.0429637	0.0733635	3H3MGLTc	Formation of 3-Hydroxy-3-Methyl-Glutarate	Valine, leucine, and isoleucine metabolism
R_3H3MGLTte_pos	26	-1.07156	0.0429637	0.0733635	3H3MGLTte	Transport of 3-Hydroxy-3-Methyl-Glutarate	Transport, extracellular
R_3HADICOAx_pos	4	-2.2598	6.80434e-05	0.00160907	3HADICOAx	Formation of 3-Hydroxy-Adipoyl Coa	Fatty acid oxidation
R_3HADPACte_pos	4	-2.2598	6.80434e-05	0.00160907	3HADPACte	Transport of 3-Hydroxy-Adipate, Extracellular	Transport, extracellular
R_3HADPACtxc_pos	4	-2.2598	6.80434e-05	0.00160907	3HADPACtxc	Transport of 3-Hydroxy-Adipate, Peroxisomal	Transport, peroxisomal
R_3HADPACx_pos	4	-2.2598	6.80434e-05	0.00160907	3HADPACx	Formation of 3-Hydroxy-Adipate	Fatty acid oxidation
R_3HAO_pos	13	-1.6758	0.00205831	0.00867112	3HAO	3 hydroxyanthranilate 3 4 dioxygenase	Tryptophan metabolism
R_3HBCDm_pos	5	-1.99294	0.000107735	0.00207961	3HBCDm	3-hydroxybutyryl-CoA dehydratase, mitochondrial	Butanoate metabolism
R_3HBCOAHLm_pos	30	-0.851239	0.0845213	0.129511	3HBCOAHLm	3-hydroxyisobutyryl-CoA hydrolase, mitochondrial	Valine, leucine, and isoleucine metabolism
R_3HBCOARc_pos	5	-1.99294	0.000107735	0.00207961	3HBCOARc	Transport of (R)-3-hydroxybutanoyl-CoA into cytosol	Fatty acid oxidation
R_3HCO3_NAt_neg	80	0.931786	0.0845213	0.129511	3HCO3_NAt	Bicarbonate transport (Na/HCO3 1:3 cotransport)	Transport, extracellular
R_3HCO3_NAt_pos	79	1.01034	0.0986176	0.146558	3HCO3_NAt	Bicarbonate transport (Na/HCO3 1:3 cotransport)	Transport, extracellular
R_3HGLUTCOAm_pos	37	-0.654947	0.223024	0.28101	3HGLUTCOAm	Acyl Coenzyme A Dehydrogenase for Glutaryl Coenzyme A, Forming 3-Hydroxy-Glutaryl Coenzyme A	Lysine metabolism
R_3HIBUPGLUC_Sitr_pos	24	-1.32523	0.0294798	0.0541191	3HIBUPGLUC_Sitr	3HIBUPGLUC Sitr	Drug metabolism
R_3HIBUPGLUC_Sthv_pos	24	-1.32523	0.0294798	0.0541191	3HIBUPGLUC_Sthv	Release of 3-hydroxy S-ibuprofen-glucuronide into hepatic vein	Drug metabolism
R_3HIBUP_Ritr_pos	15	-1.62332	0.00365166	0.011969	3HIBUP_Ritr	3HIBUP Ritr	Drug metabolism
R_3HIBUP_Rthv_neg	21	-1.49598	0.0158711	0.033564	3HIBUP_Rthv	Release of R-3-hydroxy-ibuprofen into hepatic vein	Drug metabolism
R_3HIBUP_Rthv_pos	15	-1.62332	0.00365166	0.011969	3HIBUP_Rthv	Release of R-3-hydroxy-ibuprofen into hepatic vein	Drug metabolism
R_3HIBUP_SGLUhep_pos	24	-1.32523	0.0294798	0.0541191	3HIBUP_SGLUhep	Glucuronidation of S-3-hydroxy ibuprofen	Drug metabolism
R_3HIBUP_Sitr_neg	31	-1.23029	0.0986176	0.146558	3HIBUP_Sitr	3HIBUP Sitr	Drug metabolism
R_3HIBUP_Sitr_pos	13	-1.68916	0.00205831	0.00867112	3HIBUP_Sitr	3HIBUP Sitr	Drug metabolism
R_3HIBUP_Sthv_neg	21	-1.49598	0.0158711	0.033564	3HIBUP_Sthv	Release of S-3-hydroxy-ibuprofen into hepatic vein	Drug metabolism
R_3HIBUP_Sthv_pos	13	-1.68916	0.00205831	0.00867112	3HIBUP_Sthv	Release of S-3-hydroxy-ibuprofen into hepatic vein	Drug metabolism
R_3HIVAcm_pos	26	-1.02301	0.0429637	0.0733635	3HIVAcm	Formation of 3-Hydroxy-Isovalerate	Valine, leucine, and isoleucine metabolism
R_3HIVActe_pos	26	-1.02301	0.0429637	0.0733635	3HIVActe	Transport of 3-Hydroxy-Isovalerate, Extracellular	Transport, extracellular
R_3HIVActm_pos	26	-1.02301	0.0429637	0.0733635	3HIVActm	Transport of 3-Hydroxy-Isovalerate, Mitochondrial	Transport, mitochondrial
R_3HKYNAKGAT_pos	18	-1.37466	0.00794974	0.0203633	3HKYNAKGAT	3-Hydroxy-L-kynurenine:2-oxoglutarate aminotransferase	Tryptophan metabolism
R_3HLVSTAChep_pos	12	-1.7405	0.00151964	0.0075044	3HLVSTAChep	Conversion of 3-hydroxy-lovastatin lactone to acid form	Drug metabolism
R_3HLVSTACtbc_pos	12	-1.7405	0.00151964	0.0075044	3HLVSTACtbc	Release of 3-hydroxy-lovastatin acid form into bile	Drug metabolism
R_3HLVSTitr_pos	12	-1.7405	0.00151964	0.0075044	3HLVSTitr	3HLVSTitr	Drug metabolism
R_3HLYTCL_pos	21	-1.15166	0.0158711	0.033564	3HLYTCL	3-Hydroxy-L-tyrosine carboxy-lyase	Tyrosine metabolism
R_3HMPtd_pos	26	-1.21624	0.0429637	0.0733635	3HMPtd	Transport of 3-Hydroxy-2-Methylpropanoate, Diffusion	Transport, extracellular
R_3HMPtm_pos	26	-1.21624	0.0429637	0.0733635	3HMPtm	Transport of 3-Hydroxy-Isobutyrate, Mitochondrial	Transport, mitochondrial
R_3HPPNOHGLUCte_pos	17	-1.56236	0.00619195	0.0169998	3HPPNOHGLUCte	Transport of 3- (3-Hydroxy-Phenyl)Propionate Hydroxy Derivative Glucuronide into Urine	Transport, extracellular
R_3HPPPNOHGLUCc_pos	17	-1.56236	0.00619195	0.0169998	3HPPPNOHGLUCc	Glucuronidation of 3- (3-Hydroxyphenyl)Propionate Hydroxy Derivative	Phenylalanine metabolism
R_3HPPPNOHc_pos	17	-1.56236	0.00619195	0.0169998	3HPPPNOHc	Hydroxylation of 3- (3-Hydroxyphenyl)Propionate	Phenylalanine metabolism
R_3HPPt_neg	3	-2.19112	3.9692e-05	0.00140794	3HPPt	Transpot of 3-Hydroxypropionate	Transport, extracellular
R_3HPPt_pos	24	-1.21899	0.0294798	0.0541191	3HPPt	Transpot of 3-Hydroxypropionate	Transport, extracellular
R_3HPPtm_neg	24	-1.21899	0.0294798	0.0541191	3HPPtm	Transport of 3-Hydroxypropionate, Mitochondrial	Transport, mitochondrial
R_3HPPtm_pos	3	-2.19112	3.9692e-05	0.00140794	3HPPtm	Transport of 3-Hydroxypropionate, Mitochondrial	Transport, mitochondrial
R_3HPVSCOAhc_pos	13	-1.7861	0.00205831	0.00867112	3HPVSCOAhc	3HPVSCOAhc	Drug metabolism
R_3HPVSCOAitm_neg	16	-1.64404	0.00478572	0.014183	3HPVSCOAitm	3HPVSCOAitm	Drug metabolism
R_3HPVSCOAitx_pos	7	-2.19955	0.000255163	0.00327288	3HPVSCOAitx	3HPVSCOAitx	Drug metabolism
R_3HPVSTETCOAhcm_pos	16	-1.64404	0.00478572	0.014183	3HPVSTETCOAhcm	Beta oxidation of 3-S-hydroxy-pravastatin-CoA to tatranor-CoA derivative in hepatocytes, mitochondria	Drug metabolism
R_3HPVSTETCOAhcx_pos	7	-2.19955	0.000255163	0.00327288	3HPVSTETCOAhcx	Beta oxidation of 3-S-hydroxy-pravastatin-CoA to tetranor-CoA in hepatocytes, peroxisomes	Drug metabolism
R_3HPVSTETCOAitm_pos	16	-1.64404	0.00478572	0.014183	3HPVSTETCOAitm	3HPVSTETCOAitm	Drug metabolism
R_3HPVSTETCOAitx_pos	7	-2.19955	0.000255163	0.00327288	3HPVSTETCOAitx	3HPVSTETCOAitx	Drug metabolism
R_3HPVSTEThc_pos	13	-1.7861	0.00205831	0.00867112	3HPVSTEThc	3HPVSTEThc	Drug metabolism
R_3HPVSTETteb_pos	9	-1.81611	0.000550018	0.00467566	3HPVSTETteb	Efflux of 3-S-hydroxy-pravastatin-tetranor into bile	Drug metabolism
R_3HPVSTETtev_neg	9	-1.81535	0.000550018	0.00467566	3HPVSTETtev	Exit of 3-S-hydroxy-pravastatin-tetranor into hepatic vein	Drug metabolism
R_3HPVSTETtev_pos	13	-1.7861	0.00205831	0.00867112	3HPVSTETtev	Exit of 3-S-hydroxy-pravastatin-tetranor into hepatic vein	Drug metabolism
R_3HPVShc_pos	28	-0.871607	0.0610009	0.0998401	3HPVShc	Oxidation of pravastatin to 3-hydroxy pravastatin in hepatocytes	Drug metabolism
R_3HPVSitr_pos	28	-0.871607	0.0610009	0.0998401	3HPVSitr	3HPVSitr	Drug metabolism
R_3HPVSteb_pos	28	-0.683281	0.0610009	0.0998401	3HPVSteb	Efflux of 3-S-hydroxy-pravastatin into bile	Drug metabolism
R_3HPVStep_neg	10	-1.48717	0.00078817	0.00513616	3HPVStep	3-hydroxy pravastatin exit into portal blood	Drug metabolism
R_3HPVStep_pos	20	-1.34646	0.0127184	0.0283932	3HPVStep	3-hydroxy pravastatin exit into portal blood	Drug metabolism
R_3HPVSthc_neg	10	-1.48717	0.00078817	0.00513616	3HPVSthc	Uptake of 3-hydroxy pravastatin by hepatocytes	Drug metabolism
R_3HPVSthc_pos	20	-1.34646	0.0127184	0.0283932	3HPVSthc	Uptake of 3-hydroxy pravastatin by hepatocytes	Drug metabolism
R_3HSMVACIDhep_pos	10	-1.8303	0.00078817	0.00513616	3HSMVACIDhep	Conversion of 3-hydroxy simvastatin lactone to acid form	Drug metabolism
R_3HSMVACIDteb_pos	10	-1.8303	0.00078817	0.00513616	3HSMVACIDteb	Efflux of 3-hydroxy-simvastatin-acid form into bile	Drug metabolism
R_3HSMVhep_pos	10	-1.8303	0.00078817	0.00513616	3HSMVhep	Acid catalyzed rearrangement of 6-beta-hydroxy-simvastatin to 3-hydroxy simvastatin	Drug metabolism
R_3HSMVitr_pos	10	-1.8303	0.00078817	0.00513616	3HSMVitr	3HSMVitr	Drug metabolism
R_3ISPVShc_pos	11	-1.72827	0.00110004	0.00641245	3ISPVShc	Isomerization of pravastatin to 3-alpha-iso-pravastatin in hepatocytes	Drug metabolism
R_3ISPVSitr_neg	16	-1.625	0.00478572	0.014183	3ISPVSitr	3ISPVSitr	Drug metabolism
R_3ISPVSteb_pos	28	-0.683281	0.0610009	0.0998401	3ISPVSteb	Efflux of 3-alpha-iso-pravastatin into bile	Drug metabolism
R_3ISPVStep_neg	10	-1.48717	0.00078817	0.00513616	3ISPVStep	3-alpha-iso-pravastatin exit into portal blood	Drug metabolism
R_3ISPVStep_pos	20	-1.34646	0.0127184	0.0283932	3ISPVStep	3-alpha-iso-pravastatin exit into portal blood	Drug metabolism
R_3ISPVSthc_neg	10	-1.48717	0.00078817	0.00513616	3ISPVSthc	Uptake of 3-alpha-iso-pravastatin by hepatocytes	Drug metabolism
R_3ISPVSthc_pos	20	-1.34646	0.0127184	0.0283932	3ISPVSthc	Uptake of 3-alpha-iso-pravastatin by hepatocytes	Drug metabolism
R_3ITYR_Lte_neg	30	-1.15577	0.0845213	0.129511	3ITYR_Lte	Transport of 3-Iodo-L-Tyrosine	Transport, extracellular
R_3ITYR_Lte_pos	36	-0.974861	0.197116	0.255164	3ITYR_Lte	Transport of 3-Iodo-L-Tyrosine	Transport, extracellular
R_3M4HDXPAC_pos	16	-1.43277	0.00478572	0.014183	3M4HDXPAC	3-Methoxy-4-hydroxyphenylacetaldehyde:NAD+ oxidoreductase	Tyrosine metabolism
R_3MEACMPhc_pos	8	-1.8822	0.000379909	0.00406902	3MEACMPhc	Formation of 3-methoxy-acetaminophen in hepatocytes	Drug metabolism
R_3MEACMPitr_pos	17	-1.57229	0.00619195	0.0169998	3MEACMPitr	3MEACMPitr	Drug metabolism
R_3MGLUTACc_pos	12	-1.58793	0.00151964	0.0075044	3MGLUTACc	Formation of 3-Methyl-Glutaconate	Valine, leucine, and isoleucine metabolism
R_3MGLUTACte_pos	12	-1.58793	0.00151964	0.0075044	3MGLUTACte	Transport of 3-Methyl-Glutaconate, Extracellular	Transport, extracellular
R_3MGLUTACtm_pos	12	-1.58793	0.00151964	0.0075044	3MGLUTACtm	Transport of 3-Methyl-Glutaconate, Mitochondrial	Transport, mitochondrial
R_3MGLUTRc_pos	12	-1.67403	0.00151964	0.0075044	3MGLUTRc	Formation of 3-Methyl-Glutarate	Valine, leucine, and isoleucine metabolism
R_3MGLUTRte_pos	12	-1.67403	0.00151964	0.0075044	3MGLUTRte	Transport of 3-Methyl-Glutarate	Transport, extracellular
R_3MHISc_neg	18	-1.42389	0.00794974	0.0203633	3MHISc	Formation of Methyl-Histidine	Histidine metabolism
R_3MHISc_pos	44	-0.742605	0.467855	0.519407	3MHISc	Formation of Methyl-Histidine	Histidine metabolism
R_3MHISt1_neg	12	-1.51003	0.00151964	0.0075044	3MHISt1	Transport of Methyl-Histidine by System N Transport	Transport, extracellular
R_3MHISt1_pos	20	-1.53196	0.0127184	0.0283932	3MHISt1	Transport of Methyl-Histidine by System N Transport	Transport, extracellular
R_3MHISt2_neg	46	-0.505973	0.557264	0.599564	3MHISt2	Transport of Methyl-Histidine by System L Transport (Lat1)	Transport, extracellular
R_3MHISt2_pos	19	-1.55597	0.0100931	0.0241208	3MHISt2	Transport of Methyl-Histidine by System L Transport (Lat1)	Transport, extracellular
R_3MHISt3_neg	31	-0.964269	0.0986176	0.146558	3MHISt3	Transport of Methyl-Histidine by System L Transport (Lat2)	Transport, extracellular
R_3MHISt3_pos	19	-1.53342	0.0100931	0.0241208	3MHISt3	Transport of Methyl-Histidine by System L Transport (Lat2)	Transport, extracellular
R_3MLDAt_pos	29	-1.09263	0.0720013	0.114535	3MLDAt	3MLDA extracellular transport via diffusion	Transport, extracellular
R_3MOBt2im_pos	45	-0.336051	0.511562	0.559223	3MOBt2im	3-methyl-2-oxobutanoate mitochondrial transport via proton symport	Transport, mitochondrial
R_3MOBte_neg	66	0.388245	0.467855	0.519407	3MOBte	Transport of 3-methyl-2-oxobutanoate	Transport, extracellular
R_3MOBte_pos	19	-1.29106	0.0100931	0.0241208	3MOBte	Transport of 3-methyl-2-oxobutanoate	Transport, extracellular
R_3MOPt2im_pos	45	-0.336051	0.511562	0.559223	3MOPt2im	3-Methyl-2-oxopentanoate mitochondrial transport via proton symport	Transport, mitochondrial
R_3MOPt_neg	66	0.338134	0.467855	0.519407	3MOPt	3mop reversible trasport	Transport, extracellular
R_3MOPt_pos	19	-1.29868	0.0100931	0.0241208	3MOPt	3mop reversible trasport	Transport, extracellular
R_3MOX4HOXMte_pos	19	-1.48938	0.0100931	0.0241208	3MOX4HOXMte	Transport 3-Methoxy-4-Hydroxymandelate, Extracellular	Transport, extracellular
R_3MOX4HOXPGALDOX_NADP_neg	90	1.2515	0.0127184	0.0283932	3MOX4HOXPGALDOX_NADP	3-Methoxy-4-hydroxyphenylglycolaldehyde:NADP+ oxidoreductase	Tyrosine metabolism
R_3MOX4HOXPGALDOX_NADP_pos	20	-1.22009	0.0127184	0.0283932	3MOX4HOXPGALDOX_NADP	3-Methoxy-4-hydroxyphenylglycolaldehyde:NADP+ oxidoreductase	Tyrosine metabolism
R_3MOX4HOXPGALDOX_pos	90	1.2515	0.0127184	0.0283932	3MOX4HOXPGALDOX	3-Methoxy-4-hydroxyphenylglycolaldehyde:NAD+ oxidoreductase	Tyrosine metabolism
R_3MOXTYRESSte_pos	12	-1.64865	0.00151964	0.0075044	3MOXTYRESSte	3-Methoxytyramine secretion via secretory vesicle (ATP driven)	Transport, extracellular
R_3MOXTYROX_pos	16	-1.43277	0.00478572	0.014183	3MOXTYROX	3-Methoxytyramine:oxygen oxidoreductase (deaminating)	Tyrosine metabolism
R_3MOXTYRt_neg	13	-1.62406	0.00205831	0.00867112	3MOXTYRt	Transport of 3-Methoxytyramine, Diffusion	Transport, extracellular
R_3MOXTYRt_pos	19	-1.44802	0.0100931	0.0241208	3MOXTYRt	Transport of 3-Methoxytyramine, Diffusion	Transport, extracellular
R_3MTPte_pos	36	-0.629141	0.197116	0.255164	3MTPte	Secretion of 3-Methyl-Thio-Propionate	Transport, extracellular
R_3OHACMPhr_pos	12	-1.68589	0.00151964	0.0075044	3OHACMPhr	Oxidation of acetaminophen to 3-OH-acetaminophen in hepatocytes	Drug metabolism
R_3OHACMPitr_neg	12	-1.68589	0.00151964	0.0075044	3OHACMPitr	3OHACMPitr	Drug metabolism
R_3OHACMPtev_pos	12	-1.68589	0.00151964	0.0075044	3OHACMPtev	Efflux of 3-OH-acetaminophen into hepatic vein	Drug metabolism
R_3OHGLUTACOAT3t_neg	62	0.618098	0.653903	0.692175	3OHGLUTACOAT3t	Transport of 3-Hydroxy-Glutarate, Extracellular, Antiport	Transport, extracellular
R_3OHGLUTACOAT3t_pos	37	-0.583354	0.223024	0.28101	3OHGLUTACOAT3t	Transport of 3-Hydroxy-Glutarate, Extracellular, Antiport	Transport, extracellular
R_3OHGLUTACm_pos	37	-0.654947	0.223024	0.28101	3OHGLUTACm	Formation of 3-Hydroxy-Glutarate	Lysine metabolism
R_3OHGLUTACte_pos	62	0.618098	0.653903	0.692175	3OHGLUTACte	Transport of 3-Hydroxy-Glutarate, Extracellular	Transport, extracellular
R_3OHGLUTACtm_pos	37	-0.654947	0.223024	0.28101	3OHGLUTACtm	Transport of 3-Hydroxy-Glutarate, Mitochondrial	Transport, mitochondrial
R_3OHSEBACte_pos	4	-2.12474	6.80434e-05	0.00160907	3OHSEBACte	Transport of 3-Hydroxy-Sebacic Acid, Extracellular	Transport, extracellular
R_3OHSEBACtxc_pos	4	-2.12474	6.80434e-05	0.00160907	3OHSEBACtxc	Transportof 3-Hydroxy-Sebacic Acid, Peroxisomal	Transport, peroxisomal
R_3OHSEBACx_pos	4	-2.12474	6.80434e-05	0.00160907	3OHSEBACx	Formation of 3-Hydroxy-Sebacic Acid	Fatty acid oxidation
R_3OHSEBCOAx_pos	4	-2.12474	6.80434e-05	0.00160907	3OHSEBCOAx	Formation of 3-Hydroxy-Sebacoyl Coa	Fatty acid oxidation
R_3OHSUBACte_pos	4	-2.21943	6.80434e-05	0.00160907	3OHSUBACte	Transport of 3-Hydoxy-Suberic Acid, Extracellular	Transport, extracellular
R_3OHSUBACtxc_pos	4	-2.21943	6.80434e-05	0.00160907	3OHSUBACtxc	Transport of 3-Hydoxy-Suberic Acid, Peroxisomal	Transport, peroxisomal
R_3OHSUBACx_pos	4	-2.21943	6.80434e-05	0.00160907	3OHSUBACx	Formation of 3-Hydoxy-Suberic Acid	Fatty acid oxidation
R_3OHSUBCOAx_pos	4	-2.21943	6.80434e-05	0.00160907	3OHSUBCOAx	Formation of 3-Hydoxy-Suberyl Coa	Fatty acid oxidation
R_3PGtr_neg	21	-1.34548	0.0158711	0.033564	3PGtr	Transport of 3-Phospho-D-Glycerate	Transport, extracellular
R_3PGtr_pos	21	-1.48195	0.0158711	0.033564	3PGtr	Transport of 3-Phospho-D-Glycerate	Transport, extracellular
R_3SALAASPm_neg	28	-1.09462	0.0610009	0.0998401	3SALAASPm	Cysteinesulfinate-aspartate mitochondrial shuttle	Transport, mitochondrial
R_3SALACBOXL_cho_pos	8	-1.69282	0.000379909	0.00406902	3SALACBOXL_cho	3-Sulfino-L-alanine carboxy-lyase	Taurine and hypotaurine metabolism
R_3SALAOX_pos	8	-1.69814	0.000379909	0.00406902	3SALAOX	Cysteinesulfinic acid oxidase	Taurine and hypotaurine metabolism
R_3SALATAi_pos	20	-1.459	0.0127184	0.0283932	3SALATAi	3-sulfino-alanine transaminase (irreversible)	Methionine and cysteine metabolism
R_3SALATAim_pos	6	-1.9457	0.000170109	0.00267261	3SALATAim	3-sulfino-alanine transaminase (irreversible), mitochondrial	Methionine and cysteine metabolism
R_3SPYRSP_pos	20	-1.459	0.0127184	0.0283932	3SPYRSP	3-sulfinopyruvate hydrolase (spotaneous reaction)	Methionine and cysteine metabolism
R_3SPYRSPm_pos	6	-1.9457	0.000170109	0.00267261	3SPYRSPm	3-sulfinopyruvate hydrolase (spotaneous reaction), mitochondrial	Methionine and cysteine metabolism
R_3UIBtd_neg	6	-1.6617	0.000170109	0.00267261	3UIBtd	Transport of 3-Ureidoisobutyrate, Diffusion	Transport, extracellular
R_3UIBtd_pos	21	-1.06775	0.0158711	0.033564	3UIBtd	Transport of 3-Ureidoisobutyrate, Diffusion	Transport, extracellular
R_41R1H2MAE12BOOX_pos	19	-1.41172	0.0100931	0.0241208	41R1H2MAE12BOOX	4-[(1R)-1-Hydroxy-2-(methylamino)ethyl]-1,2-benzenediol:oxygen oxidoreductase(deaminating)(flavin-containing)	Tyrosine metabolism
R_41R2A1H12BOOX_pos	16	-1.43708	0.00478572	0.014183	41R2A1H12BOOX	4-[(1R)-2-Amino-1-hydroxyethyl]-1,2-benzenediol:oxygen oxidoreductase(deaminating)(flavin-containing)	Tyrosine metabolism
R_42A12BOOX_pos	8	-1.81611	0.000379909	0.00406902	42A12BOOX	4-(2-Aminoethyl)-1,2-benzenediol:oxygen oxidoreductase(deaminating)(flavin-containing)	Tyrosine metabolism
R_4AABUTNt_neg	6	-1.96488	0.000170109	0.00267261	4AABUTNt	Diffusion of 4-Acetamidobutanoate	Transport, extracellular
R_4ABUTtcn_pos	12	-1.51037	0.00151964	0.0075044	4ABUTtcn	Transport of GABA	Transport, nuclear
R_4ABUTtm_neg	22	-1.08683	0.0196645	0.0392806	4ABUTtm	4 aminobutanoate mitochondrial transport via diffusion	Transport, mitochondrial
R_4ABUTtm_pos	32	-0.878456	0.114466	0.165831	4ABUTtm	4 aminobutanoate mitochondrial transport via diffusion	Transport, mitochondrial
R_4BHGLZABCt_pos	10	-1.76918	0.00078817	0.00513616	4BHGLZABCt	Excretion of 4-beta-OH-gliclazide into bile	Drug metabolism
R_4BHGLZhr_pos	17	-1.59668	0.00619195	0.0169998	4BHGLZhr	Oxidation of gliclazide to 4-beta-OH-gliclazide in hepatocytes	Drug metabolism
R_4BHGLZitr_pos	17	-1.59668	0.00619195	0.0169998	4BHGLZitr	4BHGLZitr	Drug metabolism
R_4BHGLZtev_neg	10	-1.76918	0.00078817	0.00513616	4BHGLZtev	Excretion of 4-beta-OH-gliclazide into hepatic vein	Drug metabolism
R_4BHGLZtev_pos	17	-1.59668	0.00619195	0.0169998	4BHGLZtev	Excretion of 4-beta-OH-gliclazide into hepatic vein	Drug metabolism
R_4CMCOAS_pos	17	-1.49656	0.00619195	0.0169998	4CMCOAS	4-Coumarate:Coa Ligase (AMP-Forming)	Phenylalanine metabolism
R_4GLU56DIHDINDt_pos	21	-1.28113	0.0158711	0.033564	4GLU56DIHDINDt	Transport of 4-S-Glutathionyl-5, 6-Dihydroxyindoline	Transport, extracellular
R_4HALDD_pos	90	1.2515	0.0127184	0.0283932	4HALDD	Aldehyde dehydrogenase 4 hydroxyphenylacetaldehyde NAD	Phenylalanine metabolism
R_4HATVACIDOXDhc_pos	8	-1.84066	0.000379909	0.00406902	4HATVACIDOXDhc	Oxidation of atorvastatin acid to 4-hydroxy-atorvastatin-acid in hepatocytes	Drug metabolism
R_4HATVACIDhc_pos	26	-1.14756	0.0429637	0.0733635	4HATVACIDhc	Conversion of 4-hydroxy-atorvastatin-lactone to its acid form in hepatocytes	Drug metabolism
R_4HATVACIDitr_pos	8	-1.84066	0.000379909	0.00406902	4HATVACIDitr	4HATVACIDitr	Drug metabolism
R_4HATVACIDteb_pos	29	-0.657543	0.0720013	0.114535	4HATVACIDteb	Efflux of 4-hydroxy-atorvastatin-acid into bile	Drug metabolism
R_4HATVACIDtep_neg	10	-1.48717	0.00078817	0.00513616	4HATVACIDtep	Efflux of 4-hydroxy-atorvastatin-acid into portal blood	Drug metabolism
R_4HATVACIDtep_pos	20	-1.34646	0.0127184	0.0283932	4HATVACIDtep	Efflux of 4-hydroxy-atorvastatin-acid into portal blood	Drug metabolism
R_4HATVACIDthc_neg	10	-1.48717	0.00078817	0.00513616	4HATVACIDthc	Uptake of 4-hydroxy-atorvastatin-acid into hepatocytes	Drug metabolism
R_4HATVACIDthc_pos	20	-1.34646	0.0127184	0.0283932	4HATVACIDthc	Uptake of 4-hydroxy-atorvastatin-acid into hepatocytes	Drug metabolism
R_4HATVLACOXDhc_pos	11	-1.84503	0.00110004	0.00641245	4HATVLACOXDhc	Oxidation of atorvastatin lactone to 4-hydroxy-atorvastatin-lactone in hepatocytes	Drug metabolism
R_4HATVLAChc_pos	26	-1.14804	0.0429637	0.0733635	4HATVLAChc	Conversion of 4-hydroxy-atorvastatin-lactone to its acid form in hepatocytes	Drug metabolism
R_4HATVLACitr_pos	11	-1.84503	0.00110004	0.00641245	4HATVLACitr	4HATVLACitr	Drug metabolism
R_4HATVLACteb_pos	29	-0.657543	0.0720013	0.114535	4HATVLACteb	Efflux of 4-hydroxy-atorvastatin-lactone into bile	Drug metabolism
R_4HATVLACtep_neg	10	-1.48717	0.00078817	0.00513616	4HATVLACtep	Efflux of 4-hydroxy-atorvastatin-lactone into portal blood	Drug metabolism
R_4HATVLACtep_pos	20	-1.34646	0.0127184	0.0283932	4HATVLACtep	Efflux of 4-hydroxy-atorvastatin-lactone into portal blood	Drug metabolism
R_4HATVLACthc_neg	10	-1.48717	0.00078817	0.00513616	4HATVLACthc	Uptake of 4-hydroxy-atorvastatin-lactone into hepatocytes	Drug metabolism
R_4HATVLACthc_pos	20	-1.34646	0.0127184	0.0283932	4HATVLACthc	Uptake of 4-hydroxy-atorvastatin-lactone into hepatocytes	Drug metabolism
R_4HBZCOAFm_pos	19	-1.32297	0.0100931	0.0241208	4HBZCOAFm	4 hydroxybenzoyl CoA formation	Ubiquinone synthesis
R_4HBZFm_pos	19	-1.32297	0.0100931	0.0241208	4HBZFm	4 hydroxybenzoate formation	Ubiquinone synthesis
R_4HBZte_pos	18	-1.52901	0.00794974	0.0203633	4HBZte	Transport of 4-Hydroxybenzoate, Extracellular Space	Transport, extracellular
R_4HBZtm_neg	19	-1.32297	0.0100931	0.0241208	4HBZtm	4 Hydroxybenzoate mitochondrial transport	Transport, mitochondrial
R_4HBZtm_pos	42	-0.428156	0.386679	0.441319	4HBZtm	4 Hydroxybenzoate mitochondrial transport	Transport, mitochondrial
R_4HDEBRISOQUINEte_neg	10	-1.84011	0.00078817	0.00513616	4HDEBRISOQUINEte	Xenobiotic transport	Transport, extracellular
R_4HGLSDm_pos	7	-1.87447	0.000255163	0.00327288	4HGLSDm	L 4 hydroxyglutamate semialdehyde dehydrogenase mitochondrial	Arginine and proline metabolism
R_4HMDGLUCitr_pos	23	-1.35085	0.0241554	0.0462895	4HMDGLUCitr	4HMDGLUCitr	Drug metabolism
R_4HMDGLUCtev_pos	23	-1.35085	0.0241554	0.0462895	4HMDGLUCtev	Efflux of 4-OH-midazolam-glucuronide into hepatic vein	Drug metabolism
R_4HMDZGLUChr_pos	23	-1.35085	0.0241554	0.0462895	4HMDZGLUChr	Glucuronidation of 4-OH-midazolam in enterocytes	Drug metabolism
R_4HOXPACDOX_NADP_neg	90	1.2515	0.0127184	0.0283932	4HOXPACDOX_NADP	4HOXPACDOX LPAREN NADP RPAREN	Tyrosine metabolism
R_4HOXPACDOX_NADP_pos	12	-1.62402	0.00151964	0.0075044	4HOXPACDOX_NADP	4HOXPACDOX LPAREN NADP RPAREN	Tyrosine metabolism
R_4HPROLTASCT1_pos	75	0.738386	0.173352	0.230963	4HPROLTASCT1	Exit of hydroxy-proline across the basolateral surface of enterocytes	Transport, extracellular
R_4HPRO_LTte_neg	7	-1.88568	0.000255163	0.00327288	4HPRO_LTte	Transport of trans-4-hydroxy-L-proline	Transport, extracellular
R_4HPRO_LTte_pos	15	-1.69169	0.00365166	0.011969	4HPRO_LTte	Transport of trans-4-hydroxy-L-proline	Transport, extracellular
R_4MOPt2im_pos	45	-0.336051	0.511562	0.559223	4MOPt2im	4-methyl-2-oxopentanoate mitochondrial transport via proton symport	Transport, mitochondrial
R_4MOPte_neg	69	0.41255	0.349369	0.403217	4MOPte	Transport of 4-methyl-2-oxopentanoate	Transport, extracellular
R_4MOPte_pos	36	-0.677265	0.197116	0.255164	4MOPte	Transport of 4-methyl-2-oxopentanoate	Transport, extracellular
R_4MPTNLte_pos	13	-1.66548	0.00205831	0.00867112	4MPTNLte	4-methylpentanal transport	Transport, extracellular
R_4MPTNLtm_neg	13	-1.66548	0.00205831	0.00867112	4MPTNLtm	4-methylpentanal transport (mitochondria)	Transport, mitochondrial
R_4NPHSFte_neg	25	-0.797321	0.0357001	0.0633743	4NPHSFte	Xenobiotic transport	Transport, extracellular
R_4NPHSULT_pos	25	-0.797321	0.0357001	0.0633743	4NPHSULT	4-Nitrophenol Sulfotransferase	Cytochrome metabolism
R_4NPHte_pos	19	-1.4228	0.0100931	0.0241208	4NPHte	Xenobiotic transport	Transport, extracellular
R_4OHBUTm_pos	20	-1.38896	0.0127184	0.0283932	4OHBUTm	Formation of 4-Hydroxy-Butyrate	Glutamate metabolism
R_4OHBUTtce_pos	20	-1.38896	0.0127184	0.0283932	4OHBUTtce	Transport of 4-Hydroxy-Butyrate, Extracellular	Transport, extracellular
R_4OHBUTtmc_pos	20	-1.38896	0.0127184	0.0283932	4OHBUTtmc	Transport of 4-Hydroxy-Butyrate, Mitochondrial	Transport, mitochondrial
R_4OHMDZhr_pos	12	-1.67951	0.00151964	0.0075044	4OHMDZhr	Oxidation of midazolam to 4-OH-midazolam in hepatocytes	Drug metabolism
R_4OHMDZitr_neg	17	-1.59308	0.00619195	0.0169998	4OHMDZitr	4OHMDZitr	Drug metabolism
R_4OHMDZitr_pos	12	-1.67951	0.00151964	0.0075044	4OHMDZitr	4OHMDZitr	Drug metabolism
R_4OHMDZtev_neg	17	-1.59308	0.00619195	0.0169998	4OHMDZtev	Efflux of 4-OH-midazolam into hepatic vein	Drug metabolism
R_4OHMDZtev_pos	12	-1.67951	0.00151964	0.0075044	4OHMDZtev	Efflux of 4-OH-midazolam into hepatic vein	Drug metabolism
R_4OHPROIMINOtc_pos	75	0.738386	0.173352	0.230963	4OHPROIMINOtc	Transport of L-OH-Proline by the apical IMINO amino acid transporters in kidney and intestine	Transport, extracellular
R_4PYRDX_pos	18	-1.46	0.00794974	0.0203633	4PYRDX	4-Pyridoxal secretion	Transport, extracellular
R_4TMEABUTNt1_neg	22	-1.45296	0.0196645	0.0392806	4TMEABUTNt1	Transport of 4- (Trimethylammonio)Butanoate, Sodium Symport	Transport, extracellular
R_4TMEABUTNt1_pos	26	-1.26102	0.0429637	0.0733635	4TMEABUTNt1	Transport of 4- (Trimethylammonio)Butanoate, Sodium Symport	Transport, extracellular
R_4TMEABUTNt2_neg	26	-1.26102	0.0429637	0.0733635	4TMEABUTNt2	Transport of 4- (Trimethylammonio)Butanoate, Proton Symport	Transport, extracellular
R_4TMEABUTNt2_pos	22	-1.45296	0.0196645	0.0392806	4TMEABUTNt2	Transport of 4- (Trimethylammonio)Butanoate, Proton Symport	Transport, extracellular
R_56DHPVShc_pos	15	-1.633	0.00365166	0.011969	56DHPVShc	Oxidation of triol metabolite to 3-keto-5,6,-dihydroxy-pravastatin in hepatocytes	Drug metabolism
R_56DHPVSitr_pos	15	-1.633	0.00365166	0.011969	56DHPVSitr	56DHPVSitr	Drug metabolism
R_56DHPVSteb_pos	9	-1.81657	0.000550018	0.00467566	56DHPVSteb	Efflux of 3-keto-5,6,-dihydroxy-pravastatin into bile	Drug metabolism
R_56DHPVStev_neg	9	-1.81657	0.000550018	0.00467566	56DHPVStev	Exit of 3-keto-5,6,-dihydroxy-pravastatin into hepatic vein	Drug metabolism
R_56DHPVStev_pos	15	-1.63847	0.00365166	0.011969	56DHPVStev	Exit of 3-keto-5,6,-dihydroxy-pravastatin into hepatic vein	Drug metabolism
R_56DTHMt_neg	24	-1.15149	0.0294798	0.0541191	56DTHMt	Transport of 5, 6-Dihydrothymine, Sodium Symport	Transport, extracellular
R_56DTHMt_pos	20	-1.36296	0.0127184	0.0283932	56DTHMt	Transport of 5, 6-Dihydrothymine, Sodium Symport	Transport, extracellular
R_56DTHMtd_neg	20	-1.36296	0.0127184	0.0283932	56DTHMtd	Transport of 5, 6-Dihydrothymine, Diffusion	Transport, extracellular
R_56DTHMtd_pos	24	-1.15149	0.0294798	0.0541191	56DTHMtd	Transport of 5, 6-Dihydrothymine, Diffusion	Transport, extracellular
R_56DURAt_neg	24	-1.15149	0.0294798	0.0541191	56DURAt	Transport of 5, 6-Dihydrouracil, Sodium Symport	Transport, extracellular
R_56DURAt_pos	20	-1.36296	0.0127184	0.0283932	56DURAt	Transport of 5, 6-Dihydrouracil, Sodium Symport	Transport, extracellular
R_56DURAtd_neg	20	-1.36296	0.0127184	0.0283932	56DURAtd	Transport of 5, 6-Dihydrouracil, Diffusion	Transport, extracellular
R_56DURAtd_pos	24	-1.15149	0.0294798	0.0541191	56DURAtd	Transport of 5, 6-Dihydrouracil, Diffusion	Transport, extracellular
R_56EPPVShc_pos	16	-1.625	0.00478572	0.014183	56EPPVShc	Oxidation of 3-alpha-iso-pravastatin to 5,6-epoxy-3-alpha-iso-pravastatin in hepatocytes	Drug metabolism
R_56EPPVSitr_pos	16	-1.625	0.00478572	0.014183	56EPPVSitr	56EPPVSitr	Drug metabolism
R_56EPPVSteb_pos	9	-1.81657	0.000550018	0.00467566	56EPPVSteb	Efflux of 5,6-epoxy-3-alpha-iso-pravastatin into bile	Drug metabolism
R_56EPPVStev_neg	9	-1.81657	0.000550018	0.00467566	56EPPVStev	Exit of 5,6-epoxy-3-alpha-iso-pravastatin into hepatic vein	Drug metabolism
R_56EPPVStev_pos	16	-1.62773	0.00478572	0.014183	56EPPVStev	Exit of 5,6-epoxy-3-alpha-iso-pravastatin into hepatic vein	Drug metabolism
R_5A2OPNTNte_pos	6	-1.57217	0.000170109	0.00267261	5A2OPNTNte	Transport of 5-Amino-2-Oxopentanoic Acid, Extracellular	Transport, extracellular
R_5A2OPNTNtx_pos	6	-1.57217	0.000170109	0.00267261	5A2OPNTNtx	Transport of 5-Amino-2-Oxopentanoic Acid, Peroxisome	Transport, peroxisomal
R_5ADTSTSTERONEGLCte_pos	11	-1.71861	0.00110004	0.00641245	5ADTSTSTERONEGLCte	Glucuronidated compound transport	Transport, extracellular
R_5ADTSTSTERONEGLCtr_neg	11	-1.71861	0.00110004	0.00641245	5ADTSTSTERONEGLCtr	Glucuronidated compound transport	Transport, endoplasmic reticular
R_5ADTSTSTERONESULT_pos	45	-0.375687	0.511562	0.559223	5ADTSTSTERONESULT	5alpha-Dihydrotestosterone sulfotransferase	Steroid metabolism
R_5ADTSTSTERONESte_neg	15	-1.4788	0.00365166	0.011969	5ADTSTSTERONESte	Sulfonated testosterone transport	Transport, extracellular
R_5ADTSTSTERONESte_pos	16	-1.61467	0.00478572	0.014183	5ADTSTSTERONESte	Sulfonated testosterone transport	Transport, extracellular
R_5ADTSTSTERONEte_neg	18	-1.55704	0.00794974	0.0203633	5ADTSTSTERONEte	5 alpha dihydrotesterone transport	Transport, extracellular
R_5ADTSTSTERONEte_pos	16	-1.61065	0.00478572	0.014183	5ADTSTSTERONEte	5 alpha dihydrotesterone transport	Transport, extracellular
R_5ADTSTSTERONEtr_neg	11	-1.71861	0.00110004	0.00641245	5ADTSTSTERONEtr	5 alpha dihydrotesterone intracellular transport	Transport, endoplasmic reticular
R_5ADTSTSTERONEtr_pos	14	-1.64039	0.00276143	0.0101701	5ADTSTSTERONEtr	5 alpha dihydrotesterone intracellular transport	Transport, endoplasmic reticular
R_5AOPt2_pos	30	-1.29855	0.0845213	0.129511	5AOPt2	5 Aminolevulinate transport in via proton symport	Transport, extracellular
R_5AOPt_neg	26	-1.39986	0.0429637	0.0733635	5AOPt	Transport of 5-Amino-4-Oxopentanoate, Proton Symport	Transport, extracellular
R_5AOPt_pos	30	-1.29855	0.0845213	0.129511	5AOPt	Transport of 5-Amino-4-Oxopentanoate, Proton Symport	Transport, extracellular
R_5AOPtm_neg	48	-0.179082	0.653903	0.692175	5AOPtm	5 Aminolevulinate mitochondrial transport	Heme synthesis
R_5AOPtm_pos	9	-1.9921	0.000550018	0.00467566	5AOPtm	5 Aminolevulinate mitochondrial transport	Heme synthesis
R_5CYSDOPAt_pos	15	-1.52922	0.00365166	0.011969	5CYSDOPAt	Transport of 5-S-Cysteinyldopamine	Transport, extracellular
R_5DHFtl_pos	27	-1.31313	0.0513444	0.0854271	5DHFtl	5-glutamyl-DHF transport, lysosomal	Transport, lysosomal
R_5EIPENCm_pos	6	-2.11159	0.000170109	0.00267261	5EIPENCm	Hydrolysis of 5, 8, 11, 14, 17-Eicosapentenoylcoa to 5, 8, 11, 14, 17-Eicosapentenoic Acid	Fatty acid oxidation
R_5EIPENCte_pos	6	-2.11159	0.000170109	0.00267261	5EIPENCte	Transport of 5, 8, 11, 14, 17-Eicosapentenoic Acid, Extracellular Space	Transport, extracellular
R_5EIPENCtm_pos	6	-2.11159	0.000170109	0.00267261	5EIPENCtm	Transport of 5, 8, 11, 14, 17-Eicosapentenoic Acid, Mitochondrial	Transport, mitochondrial
R_5FTHFt2_1_pos	61	0.434579	0.704504	0.739934	5FTHFt2_1	5-Formyltetrahydrofolate Transport via Anion Exchange	Transport, extracellular
R_5G2OXPTte_pos	18	-1.43773	0.00794974	0.0203633	5G2OXPTte	Transport of 5-Guanidino-2-Oxopentanoic Acid, Extracellular	Transport, extracellular
R_5G2OXPTtx_pos	18	-1.43773	0.00794974	0.0203633	5G2OXPTtx	Transport of 5-Guanidino-2-Oxopentanoic Acid, Peroxisomal	Transport, peroxisomal
R_5HLTDL_pos	11	-1.7392	0.00110004	0.00641245	5HLTDL	5-Hydroxy-L-tryptophan decarboxy-lyase	Tryptophan metabolism
R_5HOMEPRAZOLEte_neg	23	-1.47187	0.0241554	0.0462895	5HOMEPRAZOLEte	Xenobiotic transport	Transport, extracellular
R_5HOXINDACTO2OX_pos	11	-1.71524	0.00110004	0.00641245	5HOXINDACTO2OX	5-Hydroxyindoleacetaldehyde:oxygen oxidoreductase	Tryptophan metabolism
R_5HOXINDACTOX_neg	12	-1.68641	0.00151964	0.0075044	5HOXINDACTOX	5-Hydroxyindoleacetaldehyde:NAD+ oxidoreductase	Tryptophan metabolism
R_5HOXINDACTOX_pos	4	-1.99511	6.80434e-05	0.00160907	5HOXINDACTOX	5-Hydroxyindoleacetaldehyde:NAD+ oxidoreductase	Tryptophan metabolism
R_5HOXINDOAtr_neg	4	-1.99511	6.80434e-05	0.00160907	5HOXINDOAtr	Transport of 5-Hydroxyindoleacetate	Transport, extracellular
R_5HOXINDOAtr_pos	72	0.748208	0.251205	0.307811	5HOXINDOAtr	Transport of 5-Hydroxyindoleacetate	Transport, extracellular
R_5HOXINOXDA_pos	7	-1.85009	0.000255163	0.00327288	5HOXINOXDA	5-Hydroxytryptamine:oxygen oxidoreductase(deaminating)(flavin-containing)	Tryptophan metabolism
R_5HPETATP_pos	10	-1.76918	0.00078817	0.00513616	5HPETATP	Transport of 5(S)-HPETE, Active Transport	Transport, extracellular
R_5HPETtd_neg	10	-1.76895	0.00078817	0.00513616	5HPETtd	Transport of 5(S)-HPETE, Diffusion	Transport, extracellular
R_5HPETtd_pos	20	-1.42219	0.0127184	0.0283932	5HPETtd	Transport of 5(S)-HPETE, Diffusion	Transport, extracellular
R_5HTRPVESSEC_1_pos	37	-0.798349	0.223024	0.28101	5HTRPVESSEC_1	5-Hydroxy-L-Tryptophan Secretion via Secretory Vesicle (ATP Driven)	Transport, extracellular
R_5MTAte_neg	12	-1.51634	0.00151964	0.0075044	5MTAte	Transport of 5-S-methyl-5-thioadenosine	Transport, extracellular
R_5MTAte_pos	17	-1.33415	0.00619195	0.0169998	5MTAte	Transport of 5-S-methyl-5-thioadenosine	Transport, extracellular
R_5MTHFt2_1_neg	52	-0.0367137	0.863267	0.881914	5MTHFt2_1	5-Methyltetrahydrofolate Transport via Anion Exchange	Transport, extracellular
R_5MTHFt2_1_pos	52	-0.0367137	0.863267	0.881914	5MTHFt2_1	5-Methyltetrahydrofolate Transport via Anion Exchange	Transport, extracellular
R_5MTHFt2_neg	72	0.853672	0.251205	0.307811	5MTHFt2	5-methyltetrahydrofolate transport via anion exchange	Transport, extracellular
R_5MTHFt2_pos	76	0.515809	0.151737	0.207652	5MTHFt2	5-methyltetrahydrofolate transport via anion exchange	Transport, extracellular
R_5MTHFt_neg	52	-0.0367137	0.863267	0.881914	5MTHFt	5-Methyltetrahydrofolate transport via receptor binding and protolysis	Transport, extracellular
R_5MTHFt_pos	52	-0.0367137	0.863267	0.881914	5MTHFt	5-Methyltetrahydrofolate transport via receptor binding and protolysis	Transport, extracellular
R_5OHFVSGLUhc_pos	8	-1.95231	0.000379909	0.00406902	5OHFVSGLUhc	Glucuronidation of 5-hydroxy-fluvastatin	Drug metabolism
R_5OHFVSGLUitr_neg	8	-1.95231	0.000379909	0.00406902	5OHFVSGLUitr	5OHFVSGLUitr	Drug metabolism
R_5OHFVSGLUtev_pos	8	-1.95231	0.000379909	0.00406902	5OHFVSGLUtev	Exit of 5-hydroxy-fluvastatin-glucuronide into hepatic vein for excretion in urine	Drug metabolism
R_5OHFVShc_pos	7	-1.97322	0.000255163	0.00327288	5OHFVShc	Oxidation of fluvastatin to 5-hydroxy-fluvastatin in hepatocytes	Drug metabolism
R_5OHFVSitr_pos	7	-1.97322	0.000255163	0.00327288	5OHFVSitr	5OHFVSitr	Drug metabolism
R_5OHFVSteb_pos	7	-1.97322	0.000255163	0.00327288	5OHFVSteb	Efflux of 5-hydroxy-fluvastatin into bile for excretion into faeces	Drug metabolism
R_5OHHEXAc_pos	3	-2.51734	3.9692e-05	0.00140794	5OHHEXAc	Formation of 5-Hydroxy-Hexanoate	Fatty acid oxidation
R_5OHHEXAte_pos	3	-2.51734	3.9692e-05	0.00140794	5OHHEXAte	Transport of 5-Hydroxy-Hexanoate, Extracellular	Transport, extracellular
R_5OXPROt_neg	70	0.613833	0.314372	0.369235	5OXPROt	Transport of 5-oxoprolinate	Transport, extracellular
R_5OXPROt_pos	34	-0.878353	0.151737	0.207652	5OXPROt	Transport of 5-oxoprolinate	Transport, extracellular
R_5THFtl_pos	27	-1.31313	0.0513444	0.0854271	5THFtl	5-glutamyl-THF transport, lysosomal	Transport, lysosomal
R_5THFtm_pos	16	-1.57411	0.00478572	0.014183	5THFtm	5-glutamyl-THF transport,m mitochondrial	Transport, mitochondrial
R_6AHGLZABCt_pos	10	-1.76918	0.00078817	0.00513616	6AHGLZABCt	Excretion of 6-alpha-OH-gliclazide into bile	Drug metabolism
R_6AHGLZhr_pos	17	-1.59668	0.00619195	0.0169998	6AHGLZhr	Oxidation of gliclazide to 6-alpha-OH-gliclazide in hepatocytes	Drug metabolism
R_6AHGLZitr_pos	17	-1.59668	0.00619195	0.0169998	6AHGLZitr	6AHGLZitr	Drug metabolism
R_6AHGLZtev_neg	10	-1.76918	0.00078817	0.00513616	6AHGLZtev	Excretion of 6-alpha-OH-gliclazide into hepatic vein	Drug metabolism
R_6AHGLZtev_pos	17	-1.59668	0.00619195	0.0169998	6AHGLZtev	Excretion of 6-alpha-OH-gliclazide into hepatic vein	Drug metabolism
R_6BHGLZABCt_pos	10	-1.76918	0.00078817	0.00513616	6BHGLZABCt	Excretion of 6-beta-OH-gliclazide into bile	Drug metabolism
R_6BHGLZGLCABCt_pos	10	-1.76918	0.00078817	0.00513616	6BHGLZGLCABCt	Excretion of 6-beta-OH-gliclazide-glucuronide into bile	Drug metabolism
R_6BHGLZGLChr_pos	14	-1.63212	0.00276143	0.0101701	6BHGLZGLChr	Glucuronidation of 6-beta-OH-gliclazide-glucuronide in hepatocytes	Drug metabolism
R_6BHGLZGLCitr_pos	14	-1.63212	0.00276143	0.0101701	6BHGLZGLCitr	6BHGLZGLCitr	Drug metabolism
R_6BHGLZGLCtev_neg	10	-1.76918	0.00078817	0.00513616	6BHGLZGLCtev	Excretion of 6-beta-OH-gliclazide-glucuronide into hepatic vein	Drug metabolism
R_6BHGLZGLCtev_pos	14	-1.63212	0.00276143	0.0101701	6BHGLZGLCtev	Excretion of 6-beta-OH-gliclazide-glucuronide into hepatic vein	Drug metabolism
R_6BHGLZhr_pos	15	-1.62339	0.00365166	0.011969	6BHGLZhr	Oxidation of gliclazide to 6-beta-OH-gliclazide in hepatocytes	Drug metabolism
R_6BHGLZitr_neg	20	-1.52809	0.0127184	0.0283932	6BHGLZitr	6BHGLZitr	Drug metabolism
R_6BHGLZitr_pos	15	-1.62339	0.00365166	0.011969	6BHGLZitr	6BHGLZitr	Drug metabolism
R_6BHGLZtev_neg	10	-1.76918	0.00078817	0.00513616	6BHGLZtev	Excretion of 6-beta-OH-gliclazide into hepatic vein	Drug metabolism
R_6BHGLZtev_pos	15	-1.62339	0.00365166	0.011969	6BHGLZtev	Excretion of 6-beta-OH-gliclazide into hepatic vein	Drug metabolism
R_6CSMVACIDhep_pos	14	-1.63237	0.00276143	0.0101701	6CSMVACIDhep	Conversion of 6-beta-carboxy simvastatin lactone to acid form	Drug metabolism
R_6CSMVACIDteb_pos	14	-1.63237	0.00276143	0.0101701	6CSMVACIDteb	Efflux of 6-beta-carboxy-simvastatin-acid form into bile	Drug metabolism
R_6CSMVhep_pos	14	-1.63237	0.00276143	0.0101701	6CSMVhep	Oxidation of 6-exomethylene simvastatin to 6-beta-hydroxy carboxy simvastatin lactone form	Drug metabolism
R_6CSMVitr_neg	14	-1.63237	0.00276143	0.0101701	6CSMVitr	6CSMVitr	Drug metabolism
R_6DHFtl_pos	32	-1.22893	0.114466	0.165831	6DHFtl	6-glutamyl-DHF transport, lysosomal	Transport, lysosomal
R_6DHFtm_pos	24	-1.29332	0.0294798	0.0541191	6DHFtm	6-glutamyl-DHF transport,m mitochondrial	Transport, mitochondrial
R_6EPSteb_pos	28	-0.683281	0.0610009	0.0998401	6EPSteb	Efflux of 6-epipravastatin into bile	Drug metabolism
R_6EPVShc_pos	11	-1.72827	0.00110004	0.00641245	6EPVShc	Isomerization of pravastatin to 6-epi-pravastatin in hepatocytes	Drug metabolism
R_6EPVStep_neg	10	-1.48717	0.00078817	0.00513616	6EPVStep	6-epi-pravastatin exit into portal blood	Drug metabolism
R_6EPVStep_pos	20	-1.34646	0.0127184	0.0283932	6EPVStep	6-epi-pravastatin exit into portal blood	Drug metabolism
R_6EPVSthc_neg	10	-1.48717	0.00078817	0.00513616	6EPVSthc	Uptake of 6-epi-pravastatin by hepatocytes	Drug metabolism
R_6EPVSthc_pos	20	-1.34646	0.0127184	0.0283932	6EPVSthc	Uptake of 6-epi-pravastatin by hepatocytes	Drug metabolism
R_6HLVSTACIDitr_pos	12	-1.71542	0.00151964	0.0075044	6HLVSTACIDitr	6HLVSTACIDitr	Drug metabolism
R_6HLVSTAChep_pos	14	-1.6727	0.00276143	0.0101701	6HLVSTAChep	Conversion of lactone form of 6-beta-hydroxy-lovastatin to acid form	Drug metabolism
R_6HLVSTitr_pos	12	-1.67951	0.00151964	0.0075044	6HLVSTitr	6HLVSTitr	Drug metabolism
R_6HLVSTthep_neg	12	-1.67951	0.00151964	0.0075044	6HLVSTthep	Uptake of 6-beta-hydroxy-lovastatin by hepatocytes	Drug metabolism
R_6HLVSTthep_pos	15	-1.62223	0.00365166	0.011969	6HLVSTthep	Uptake of 6-beta-hydroxy-lovastatin by hepatocytes	Drug metabolism
R_6HMSMVACIDhep_pos	10	-1.85117	0.00078817	0.00513616	6HMSMVACIDhep	Conversion of 6-beta-hydroxy-methyl simvastatin lactone to acid form	Drug metabolism
R_6HMSMVACIDteb_pos	10	-1.85117	0.00078817	0.00513616	6HMSMVACIDteb	Efflux of 6-beta-hydroxy-methyl-simvastatin-acid into bile	Drug metabolism
R_6HMSMVhep_pos	10	-1.85117	0.00078817	0.00513616	6HMSMVhep	Oxidation of 6-exomethylene simvastatin to 6-beta-hydroxy methyl simvastatin	Drug metabolism
R_6HMSMVitr_neg	10	-1.85117	0.00078817	0.00513616	6HMSMVitr	6HMSMVitr	Drug metabolism
R_6HOXMELATNte_pos	10	-1.62839	0.00078817	0.00513616	6HOXMELATNte	6-Hydroxymelatonin Diffusion, Cytosol	Transport, extracellular
R_6HSMVACIDhep_pos	11	-1.76482	0.00110004	0.00641245	6HSMVACIDhep	Conversion of 6-beta-hydroxy simvastatin lactone to acid form	Drug metabolism
R_6HSMVACIDteb_pos	11	-1.76482	0.00110004	0.00641245	6HSMVACIDteb	Efflux of 6-beta-hydroxy simvastatin acid into bile	Drug metabolism
R_6HSMVhep_pos	11	-1.76482	0.00110004	0.00641245	6HSMVhep	Oxidation of simvastatin to 6-beta-hydroxy simvastatin	Drug metabolism
R_6HSMVitr_pos	11	-1.76482	0.00110004	0.00641245	6HSMVitr	6HSMVitr	Drug metabolism
R_6HTSTSTERONEte_pos	14	-1.56448	0.00276143	0.0101701	6HTSTSTERONEte	Hydroxylated testosterone transport	Transport, extracellular
R_6HTSTSTERONEtr_neg	14	-1.56448	0.00276143	0.0101701	6HTSTSTERONEtr	Hydroxylated testosterone transport	Transport, endoplasmic reticular
R_6MELACAChep_pos	13	-1.66893	0.00205831	0.00867112	6MELACAChep	Conversion of lactone form of 6-exomethylene-lovastatin to acid form	Drug metabolism
R_6MELVACIDitr_pos	12	-1.72117	0.00151964	0.0075044	6MELVACIDitr	6MELVACIDitr	Drug metabolism
R_6MELVACtbc_pos	13	-1.66893	0.00205831	0.00867112	6MELVACtbc	Release of 6-exomethylene-lovastatin-acid form into bile	Drug metabolism
R_6MELVSTitr_pos	14	-1.64251	0.00276143	0.0101701	6MELVSTitr	6MELVSTitr	Drug metabolism
R_6MELVSTthep_neg	14	-1.64251	0.00276143	0.0101701	6MELVSTthep	Uptake of 6-exomethylene-lovastatin by hepatocytes	Drug metabolism
R_6MELVSTthep_pos	13	-1.65431	0.00205831	0.00867112	6MELVSTthep	Uptake of 6-exomethylene-lovastatin by hepatocytes	Drug metabolism
R_6MSMVhep_pos	10	-1.85117	0.00078817	0.00513616	6MSMVhep	Oxidation of simvastatin to 6-exomethylene lactone form	Drug metabolism
R_6OHFVSGLUhc_pos	8	-1.95231	0.000379909	0.00406902	6OHFVSGLUhc	Glucuronidation of 6-hydroxy-fluvastatin	Drug metabolism
R_6OHFVSGLUitr_neg	8	-1.95231	0.000379909	0.00406902	6OHFVSGLUitr	6OHFVSGLUitr	Drug metabolism
R_6OHFVSGLUtev_pos	8	-1.95231	0.000379909	0.00406902	6OHFVSGLUtev	Exit of 6-hydroxy-fluvastatin-glucuronide into hepatic vein for excretion in urine	Drug metabolism
R_6OHFVShc_pos	15	-1.64503	0.00365166	0.011969	6OHFVShc	Oxidation of fluvastatin to 6-hydroxy-fluvastatin in hepatocytes	Drug metabolism
R_6OHFVSitr_neg	15	-1.64503	0.00365166	0.011969	6OHFVSitr	6OHFVSitr	Drug metabolism
R_6OHFVSteb_pos	15	-1.64503	0.00365166	0.011969	6OHFVSteb	Efflux of 6-hydroxy-fluvastatin into bile for excretion into faeces	Drug metabolism
R_6THFtl_pos	32	-1.22893	0.114466	0.165831	6THFtl	6-glutamyl-THF transport, lysosomal	Transport, lysosomal
R_6THFtm_pos	20	-1.52571	0.0127184	0.0283932	6THFtm	6-glutamyl-THF transport,m mitochondrial	Transport, mitochondrial
R_7AHGLZABCt_pos	10	-1.76918	0.00078817	0.00513616	7AHGLZABCt	Excretion of 7-alpha-OH-gliclazide into bile	Drug metabolism
R_7AHGLZhr_pos	17	-1.59668	0.00619195	0.0169998	7AHGLZhr	Oxidation of gliclazide to 7-alpha-OH-gliclazide in hepatocytes	Drug metabolism
R_7AHGLZitr_pos	17	-1.59668	0.00619195	0.0169998	7AHGLZitr	7AHGLZitr	Drug metabolism
R_7AHGLZtev_neg	10	-1.76918	0.00078817	0.00513616	7AHGLZtev	Excretion of 7-alpha-OH-gliclazide into hepatic vein	Drug metabolism
R_7AHGLZtev_pos	17	-1.59668	0.00619195	0.0169998	7AHGLZtev	Excretion of 7-alpha-OH-gliclazide into hepatic vein	Drug metabolism
R_7BHGLZABCt_pos	10	-1.76918	0.00078817	0.00513616	7BHGLZABCt	Excretion of 7-beta-OH-gliclazide into bile	Drug metabolism
R_7BHGLZGLCABCt_pos	10	-1.76918	0.00078817	0.00513616	7BHGLZGLCABCt	Excretion of 7-beta-OH-gliclazide-glucuronide into bile	Drug metabolism
R_7BHGLZGLChr_pos	14	-1.63209	0.00276143	0.0101701	7BHGLZGLChr	Glucuronidation of 7-beta-OH-gliclazide-glucuronide in hepatocytes	Drug metabolism
R_7BHGLZGLCitr_pos	14	-1.63209	0.00276143	0.0101701	7BHGLZGLCitr	7BHGLZGLCitr	Drug metabolism
R_7BHGLZGLCtev_neg	10	-1.76918	0.00078817	0.00513616	7BHGLZGLCtev	Excretion of 7-beta-OH-gliclazide-glucuronide into hepatic vein	Drug metabolism
R_7BHGLZGLCtev_pos	14	-1.63209	0.00276143	0.0101701	7BHGLZGLCtev	Excretion of 7-beta-OH-gliclazide-glucuronide into hepatic vein	Drug metabolism
R_7BHGLZhr_pos	15	-1.62332	0.00365166	0.011969	7BHGLZhr	Oxidation of gliclazide to 7-beta-OH-gliclazide in hepatocytes	Drug metabolism
R_7BHGLZitr_neg	20	-1.52809	0.0127184	0.0283932	7BHGLZitr	7BHGLZitr	Drug metabolism
R_7BHGLZitr_pos	15	-1.62332	0.00365166	0.011969	7BHGLZitr	7BHGLZitr	Drug metabolism
R_7BHGLZtev_neg	10	-1.76918	0.00078817	0.00513616	7BHGLZtev	Excretion of 7-beta-OH-gliclazide into hepatic vein	Drug metabolism
R_7BHGLZtev_pos	15	-1.62332	0.00365166	0.011969	7BHGLZtev	Excretion of 7-beta-OH-gliclazide into hepatic vein	Drug metabolism
R_7DHCDCHOLabc_pos	21	-1.12767	0.0158711	0.033564	7DHCDCHOLabc	7-Dehydrochenodeoxycholic acid ABC bile acid transporter	Transport, extracellular
R_7DHCDCHOLt2_pos	71	0.676007	0.28162	0.338451	7DHCDCHOLt2	7-Dehydrochenodeoxycholic acid transport via sodium cotransport	Transport, extracellular
R_7DHCDCHOLt_neg	71	0.676007	0.28162	0.338451	7DHCDCHOLt	7-Dehydrochenodeoxycholic acid transport via bicarbonate countertransport	Transport, extracellular
R_7DHCDCHOLt_pos	21	-1.12611	0.0158711	0.033564	7DHCDCHOLt	7-Dehydrochenodeoxycholic acid transport via bicarbonate countertransport	Transport, extracellular
R_7DHCHOLabc_pos	21	-1.12767	0.0158711	0.033564	7DHCHOLabc	7-Dehydrocholic acid ABC bile acid transporter	Transport, extracellular
R_7DHCHOLt2_pos	71	0.676007	0.28162	0.338451	7DHCHOLt2	7-Dehydrocholic acid transport via sodium cotransport	Transport, extracellular
R_7DHCHOLt_neg	71	0.676007	0.28162	0.338451	7DHCHOLt	7-Dehydrocholic acid transport via bicarbonate countertransport	Transport, extracellular
R_7DHCHOLt_pos	21	-1.12611	0.0158711	0.033564	7DHCHOLt	7-Dehydrocholic acid transport via bicarbonate countertransport	Transport, extracellular
R_7DHCHSTEROLt_pos	10	-1.76918	0.00078817	0.00513616	7DHCHSTEROLt	Transport of Cholesta-5, 7-Dien-3Beta-Ol, Active Transport	Transport, extracellular
R_7DHCHSTEROLtd_neg	10	-1.77044	0.00078817	0.00513616	7DHCHSTEROLtd	Transport of Cholesta-5, 7-Dien-3Beta-Ol, Diffusion	Transport, extracellular
R_7DHCHSTEROLtd_pos	14	-1.81446	0.00276143	0.0101701	7DHCHSTEROLtd	Transport of Cholesta-5, 7-Dien-3Beta-Ol, Diffusion	Transport, extracellular
R_7DHCHSTEROLtr_neg	7	-2.06344	0.000255163	0.00327288	7DHCHSTEROLtr	Cholesterol precursor intracellular transport	Transport, endoplasmic reticular
R_7DHCHSTEROLtr_pos	11	-1.88463	0.00110004	0.00641245	7DHCHSTEROLtr	Cholesterol precursor intracellular transport	Transport, endoplasmic reticular
R_7DHFtl_pos	35	-1.18179	0.173352	0.230963	7DHFtl	7-glutamyl-DHF transport, lysosomal	Transport, lysosomal
R_7DHFtm_pos	24	-1.28302	0.0294798	0.0541191	7DHFtm	7-glutamyl-DHF transport,m mitochondrial	Transport, mitochondrial
R_7HPVShc_pos	16	-1.625	0.00478572	0.014183	7HPVShc	Oxidation of 3-alpha-iso-pravastatin to 7-hydroxy-3-alpha-iso-pravastatin in hepatocytes	Drug metabolism
R_7HPVSitr_pos	16	-1.625	0.00478572	0.014183	7HPVSitr	7HPVSitr	Drug metabolism
R_7HPVSteb_pos	9	-1.81657	0.000550018	0.00467566	7HPVSteb	Efflux of 7-hydroxy-3-alpha-iso-pravastatin into bile	Drug metabolism
R_7HPVStev_neg	9	-1.81657	0.000550018	0.00467566	7HPVStev	Exit of 7-hydroxy-3-alpha-iso-pravastatin into hepatic vein	Drug metabolism
R_7HPVStev_pos	16	-1.62773	0.00478572	0.014183	7HPVStev	Exit of 7-hydroxy-3-alpha-iso-pravastatin into hepatic vein	Drug metabolism
R_7KILTCHOLATP_pos	26	-0.779927	0.0429637	0.0733635	7KILTCHOLATP	Transport of 7-Ketolithocholate, Active Transport	Transport, extracellular
R_7KILTCHOLt_neg	26	-0.777701	0.0429637	0.0733635	7KILTCHOLt	Transport of 7-Ketolithocholate, Sodium Symport	Transport, extracellular
R_7KILTCHOLt_pos	14	-1.57216	0.00276143	0.0101701	7KILTCHOLt	Transport of 7-Ketolithocholate, Sodium Symport	Transport, extracellular
R_7KLITCHOLc_pos	17	-1.55595	0.00619195	0.0169998	7KLITCHOLc	Formation of 7-Ketolithocholate	Bile acid synthesis
R_7OHOCTAc_pos	22	-1.45498	0.0196645	0.0392806	7OHOCTAc	Formation of 7-Hydroxy-Octanoate	Fatty acid oxidation
R_7OHOCTAte_pos	22	-1.45498	0.0196645	0.0392806	7OHOCTAte	Transport of 7-Hydroxy-Octanoate, Extracellular	Transport, extracellular
R_7THFtl_pos	35	-1.18179	0.173352	0.230963	7THFtl	7-glutamyl-THF transport, lysosomal	Transport, lysosomal
R_7THFtm_pos	22	-1.24415	0.0196645	0.0392806	7THFtm	7-glutamyl-THF transport,m mitochondrial	Transport, mitochondrial
R_A4GALTc_pos	37	-0.772796	0.223024	0.28101	A4GALTc	Lactosylceramide 4-alpha-galactosyltransferase	Sphingolipid metabolism
R_A4GALTg_pos	25	-1.26001	0.0357001	0.0633743	A4GALTg	Lactosylceramide 4-alpha-galactosyltransferase	Sphingolipid metabolism
R_A4GNT1g_pos	12	-1.60679	0.00151964	0.0075044	A4GNT1g	Alpha 1,4-N-acetylglucosaminyltransferase, Golgi apparatus	O-glycan metabolism
R_A4GNT2g_pos	14	-1.58043	0.00276143	0.0101701	A4GNT2g	Alpha 1,4-N-acetylglucosaminyltransferase, Golgi apparatus	O-glycan metabolism
R_AACOAT_pos	24	-0.927911	0.0294798	0.0541191	AACOAT	Acetoacetyl-CoA:acetate CoA-transferase	Propanoate metabolism
R_AACTOOR_pos	15	-1.43765	0.00365166	0.011969	AACTOOR	Aminoacetone:oxygen oxidoreductase(deaminating)(flavin-containing)	Glycine, serine, alanine, and threonine metabolism
R_AACTte_neg	30	-0.894624	0.0845213	0.129511	AACTte	Assumed Passive Diffusion into Extracellular Space	Transport, extracellular
R_AACTte_pos	6	-1.63277	0.000170109	0.00267261	AACTte	Assumed Passive Diffusion into Extracellular Space	Transport, extracellular
R_AACTtm_pos	30	-0.894624	0.0845213	0.129511	AACTtm	Aminoacetone transport (mitochondrial)	Transport, mitochondrial
R_AADSACYCL_pos	23	-1.44698	0.0241554	0.0462895	AADSACYCL	AAPSAS	Lysine metabolism
R_AASAD3_pos	38	-0.661257	0.251205	0.307811	AASAD3	L-aminoadipate-semialdehyde dehydrogenase (NADH)	Lysine metabolism
R_AASAD3m_pos	35	-0.864027	0.173352	0.230963	AASAD3m	L-aminoadipate-semialdehyde dehydrogenase (NADH), mitochondrial	Lysine metabolism
R_AATA_neg	22	-1.44205	0.0196645	0.0392806	AATA	2 aminoadipate transaminase	Lysine metabolism
R_AATA_pos	46	-0.568669	0.557264	0.599564	AATA	2 aminoadipate transaminase	Lysine metabolism
R_ABO1g_pos	36	-0.89028	0.197116	0.255164	ABO1g	ABO blood group (transferase A, alpha 1-3-N-acetylgalactosaminyltransferase; transferase B, alpha 1-3-galactosyltransferase)	Blood group synthesis
R_ABO2g_pos	36	-0.842544	0.197116	0.255164	ABO2g	ABO blood group (transferase A, alpha 1-3-N-acetylgalactosaminyltransferase; transferase B, alpha 1-3-galactosyltransferase)	Blood group synthesis
R_ABO3g_pos	36	-0.888705	0.197116	0.255164	ABO3g	ABO blood group (transferase A, alpha 1-3-N-acetylgalactosaminyltransferase; transferase B, alpha 1-3-galactosyltransferase)	Blood group synthesis
R_ABO4g_pos	37	-0.773648	0.223024	0.28101	ABO4g	ABO blood group (transferase A, alpha 1-3-N-acetylgalactosaminyltransferase; transferase B, alpha 1-3-galactosyltransferase)	Blood group synthesis
R_ABO5g_pos	37	-0.773648	0.223024	0.28101	ABO5g	ABO blood group (transferase A, alpha 1-3-N-acetylgalactosaminyltransferase; transferase B, alpha 1-3-galactosyltransferase)	Blood group synthesis
R_ABO6g_pos	35	-0.890989	0.173352	0.230963	ABO6g	ABO blood group (transferase A, alpha 1-3-N-acetylgalactosaminyltransferase; transferase B, alpha 1-3-galactosyltransferase)	Blood group synthesis
R_ABO7g_pos	35	-0.890989	0.173352	0.230963	ABO7g	ABO blood group (transferase A, alpha 1-3-N-acetylgalactosaminyltransferase; transferase B, alpha 1-3-galactosyltransferase)	Blood group synthesis
R_ABO8g_pos	30	-0.99665	0.0845213	0.129511	ABO8g	ABO blood group (transferase A, alpha 1-3-N-acetylgalactosaminyltransferase; transferase B, alpha 1-3-galactosyltransferase)	Blood group synthesis
R_ABO9g_pos	31	-1.0637	0.0986176	0.146558	ABO9g	ABO blood group (transferase A, alpha 1-3-N-acetylgalactosaminyltransferase; transferase B, alpha 1-3-galactosyltransferase)	Blood group synthesis
R_ABTArm_neg	22	-1.08683	0.0196645	0.0392806	ABTArm	4-aminobutyrate transaminase, reversible (mitochondrial)	Glutamate metabolism
R_ABTArm_pos	32	-0.878456	0.114466	0.165831	ABTArm	4-aminobutyrate transaminase, reversible (mitochondrial)	Glutamate metabolism
R_ABTD1_neg	18	-1.41864	0.00794974	0.0203633	ABTD1	L-Arabinitol 4-Dehydrogenase	Pentose phosphate pathway
R_ABTD_neg	19	-1.38504	0.0100931	0.0241208	ABTD	L-arabinitol 4-dehydrogenase	Pentose phosphate pathway
R_ABTD_pos	17	-1.68312	0.00619195	0.0169998	ABTD	L-arabinitol 4-dehydrogenase	Pentose phosphate pathway
R_ABT_Dt_neg	30	-1.29855	0.0845213	0.129511	ABT_Dt	D-Arabitol Transport via Diffusion	Transport, extracellular
R_ABT_Dt_pos	30	-1.29855	0.0845213	0.129511	ABT_Dt	D-Arabitol Transport via Diffusion	Transport, extracellular
R_ABTpp2_neg	30	-1.29855	0.0845213	0.129511	ABTpp2	D-arabinitol transport in via proton symporter	Transport, extracellular
R_ABTpp2_pos	30	-1.29855	0.0845213	0.129511	ABTpp2	D-arabinitol transport in via proton symporter	Transport, extracellular
R_ABTt_neg	19	-1.38672	0.0100931	0.0241208	ABTt	L arabinitol transport via passive diffusion	Transport, extracellular
R_ABUTD_pos	11	-1.66328	0.00110004	0.00641245	ABUTD	Aminobutyraldehyde dehydrogenase	Beta-Alanine metabolism
R_ABUTt2rL_neg	24	-1.26252	0.0294798	0.0541191	ABUTt2rL	4-aminobutyrate reversible transport in via proton symport (lysosome)	Transport, lysosomal
R_ABUTt2rL_pos	69	0.533382	0.349369	0.403217	ABUTt2rL	4-aminobutyrate reversible transport in via proton symport (lysosome)	Transport, lysosomal
R_ABUTt2r_neg	81	1.15754	0.0720013	0.114535	ABUTt2r	4 aminobutyrate reversible transport in via proton symport	Transport, extracellular
R_ABUTt2r_pos	73	1.06764	0.223024	0.28101	ABUTt2r	4 aminobutyrate reversible transport in via proton symport	Transport, extracellular
R_ABUTt4_2_r_neg	70	0.739189	0.314372	0.369235	ABUTt4_2_r	ABUTt4 LPAREN 2 RPAREN r	Transport, extracellular
R_ABUTt4_2_r_pos	81	1.15754	0.0720013	0.114535	ABUTt4_2_r	ABUTt4 LPAREN 2 RPAREN r	Transport, extracellular
R_ACACT10m_neg	28	-1.14644	0.0610009	0.0998401	ACACT10m	Acetyl-CoA C-acyltransferase	Valine, leucine, and isoleucine metabolism
R_ACACT10m_pos	52	-0.266406	0.863267	0.881914	ACACT10m	Acetyl-CoA C-acyltransferase	Valine, leucine, and isoleucine metabolism
R_ACACT1m_pos	42	-0.398929	0.386679	0.441319	ACACT1m	Acetyl CoA C acetyltransferase mitochondrial	Tryptophan metabolism
R_ACACT1r_neg	35	-0.460755	0.173352	0.230963	ACACT1r	Acetyl-CoA C-acetyltransferase	Tryptophan metabolism
R_ACACT1r_pos	16	-1.3906	0.00478572	0.014183	ACACT1r	Acetyl-CoA C-acetyltransferase	Tryptophan metabolism
R_ACACT1x_pos	2	-2.2322	2.26811e-05	0.00110304	ACACT1x	Acetyl-CoA:acetyl-CoA C-acetyltransferase	Cholesterol metabolism
R_ACACT4m_neg	12	-1.35356	0.00151964	0.0075044	ACACT4m	Acetyl-CoA C-acyltransferase (C10:0)	Fatty acid oxidation
R_ACACT4m_pos	26	-0.985371	0.0429637	0.0733635	ACACT4m	Acetyl-CoA C-acyltransferase (C10:0)	Fatty acid oxidation
R_ACACT4p_pos	1	-2.13514	1.13406e-05	0.00109147	ACACT4p	Acetyl CoA C acetyltransferase octanoyl CoA peroxisomal	Fatty acid oxidation
R_ACACT5m_neg	14	-1.33732	0.00276143	0.0101701	ACACT5m	Acetyl-CoA C-acyltransferase (C12:0)	Fatty acid oxidation
R_ACACT5m_pos	45	-0.414411	0.511562	0.559223	ACACT5m	Acetyl-CoA C-acyltransferase (C12:0)	Fatty acid oxidation
R_ACACT5p_pos	4	-2.03416	6.80434e-05	0.00160907	ACACT5p	Acetyl CoA C acyltransferase decanoyl CoA peroxisomal	Fatty acid oxidation
R_ACACT6m_neg	43	-0.58616	0.426167	0.479194	ACACT6m	Acetyl-CoA C-acyltransferase (C14:0)	Fatty acid oxidation
R_ACACT6p_pos	4	-2.03416	6.80434e-05	0.00160907	ACACT6p	Acetyl CoA C acetyltransferase dodecanoyl peroxisomal	Fatty acid oxidation
R_ACACT7m_neg	44	-0.516628	0.467855	0.519407	ACACT7m	Acetyl-CoA C-acyltransferase (C16:0)	Fatty acid oxidation
R_ACACT7p_pos	2	-2.06453	2.26811e-05	0.00110304	ACACT7p	Acetyl CoA acyltransferase tetradecanoyl CoA peroxisomal	Fatty acid oxidation
R_ACACT8p_pos	1	-2.1604	1.13406e-05	0.00109147	ACACT8p	Acetyl CoA acyltransferase hexadecanoyl CoA peroxisomal	Fatty acid oxidation
R_ACACT9p_pos	12	-1.56783	0.00151964	0.0075044	ACACT9p	Acetyl CoA acyltransferase tetracosanoyl CoA peroxisomal	Fatty acid oxidation
R_ACACt2_neg	85	1.16947	0.0357001	0.0633743	ACACt2	Acetoacetate transport via proton symport	Transport, extracellular
R_ACACt2_pos	85	1.16947	0.0357001	0.0633743	ACACt2	Acetoacetate transport via proton symport	Transport, extracellular
R_ACACt2m_neg	34	-0.618503	0.151737	0.207652	ACACt2m	Acetoacetate mitochondrial transport via H+ symport	Transport, mitochondrial
R_ACACt2m_pos	21	-1.42383	0.0158711	0.033564	ACACt2m	Acetoacetate mitochondrial transport via H+ symport	Transport, mitochondrial
R_ACACtx_neg	19	-1.38948	0.0100931	0.0241208	ACACtx	Acetoacetate transport via diffusion, glyoxysome	Transport, peroxisomal
R_ACALDt_neg	15	-1.55786	0.00365166	0.011969	ACALDt	Acetaldehyde reversible transport	Transport, extracellular
R_ACALDt_pos	22	-1.52168	0.0196645	0.0392806	ACALDt	Acetaldehyde reversible transport	Transport, extracellular
R_ACALDtm_neg	9	-1.78574	0.000550018	0.00467566	ACALDtm	Acetaldehyde mitochondrial diffusion	Transport, mitochondrial
R_ACALDtr_pos	14	-1.60104	0.00276143	0.0101701	ACALDtr	Acetaldehyde reversible transport (ER)	Transport, endoplasmic reticular
R_ACALDtx_pos	22	-1.50345	0.0196645	0.0392806	ACALDtx	Acetaldehyde transport via diffusion, glyoxysome	Transport, peroxisomal
R_ACCOAC_pos	32	-0.65146	0.114466	0.165831	ACCOAC	Acetyl-CoA carboxylase	Fatty acid oxidation
R_ACCOACrm_pos	63	0.232857	0.60473	0.64659	ACCOACrm	Acetyl Coa carboxylase mitochondrial	Fatty acid oxidation
R_ACCOAL_pos	22	-1.03555	0.0196645	0.0392806	ACCOAL	Acetate-CoA ligase (ADP-forming)	Propanoate metabolism
R_ACCOALm_pos	62	0.205156	0.653903	0.692175	ACCOALm	Acetate-CoA ligase (AMP-forming)	Propanoate metabolism
R_ACCOAgt_pos	20	-1.24214	0.0127184	0.0283932	ACCOAgt	Acetyl-coa transport	Transport, extracellular
R_ACCOAtr_neg	27	-0.94899	0.0513444	0.0854271	ACCOAtr	Acetyl-coa transport	Transport, endoplasmic reticular
R_ACCOAtr_pos	27	-0.94899	0.0513444	0.0854271	ACCOAtr	Acetyl-coa transport	Transport, endoplasmic reticular
R_ACChex_neg	38	-0.754921	0.251205	0.307811	ACChex	Palmitoyl Coenzyme A Hydrolase	Fatty acid oxidation
R_ACDO_pos	12	-1.7868	0.00151964	0.0075044	ACDO	Acireductone dioxygenase	Methionine and cysteine metabolism
R_ACER11r_pos	16	-1.44315	0.00478572	0.014183	ACER11r	Alkaline Ceramidase 1 (Acer1) Or Alkaline Ceramidase 3 (Acer3)	Sphingolipid metabolism
R_ACER12r_pos	15	-1.50324	0.00365166	0.011969	ACER12r	Alkaline Ceramidase 1 (Acer1) Or Alkaline Ceramidase 3 (Acer3)	Exchange/demand reaction
R_ACER21g_pos	15	-1.4311	0.00365166	0.011969	ACER21g	Alkaline Ceramidase 2 (Acer2) Or Alkaline Ceramidase 3 (Acer3)	Exchange/demand reaction
R_ACER22g_pos	18	-1.49372	0.00794974	0.0203633	ACER22g	Alkaline Ceramidase 2 (Acer2) Or Alkaline Ceramidase 3 (Acer3)	Sphingolipid metabolism
R_ACER23g_pos	22	-1.15396	0.0196645	0.0392806	ACER23g	Alkaline Ceramidase 3 (Acer3) Or Alkaline Ceramidase 2 (Acer2)	Sphingolipid metabolism
R_ACER31r_pos	22	-1.17696	0.0196645	0.0392806	ACER31r	Alkaline Ceramidase 3 (Acer3)	Sphingolipid metabolism
R_ACETONEt2_neg	24	-1.09771	0.0294798	0.0541191	ACETONEt2	Acetone transport via proton symport	Transport, extracellular
R_ACETONEt2_pos	37	-0.782797	0.223024	0.28101	ACETONEt2	Acetone transport via proton symport	Transport, extracellular
R_ACETONEt2m_neg	24	-1.09771	0.0294798	0.0541191	ACETONEt2m	Acetone mitochondrial transport via proton symport	Transport, mitochondrial
R_ACETONEt2m_pos	37	-0.782797	0.223024	0.28101	ACETONEt2m	Acetone mitochondrial transport via proton symport	Transport, mitochondrial
R_ACGAGBSIDEtg_neg	19	-1.35145	0.0100931	0.0241208	ACGAGBSIDEtg	Acgagbside hs intracellular transport	Transport, golgi apparatus
R_ACGAGBSIDEtl_pos	19	-1.35145	0.0100931	0.0241208	ACGAGBSIDEtl	Acgagbside hs intracellular transport	Transport, lysosomal
R_ACGALFUCGALACGALFUC12GAL14ACGLCGALGLUSIDEte_neg	37	-0.773648	0.223024	0.28101	ACGALFUCGALACGALFUC12GAL14ACGLCGALGLUSIDEte	Blood group intracellular transport	Transport, extracellular
R_ACGALFUCGALACGALFUC12GAL14ACGLCGALGLUSIDEtg_pos	37	-0.773648	0.223024	0.28101	ACGALFUCGALACGALFUC12GAL14ACGLCGALGLUSIDEtg	Blood group intracellular transport	Transport, golgi apparatus
R_ACGALFUCGALACGALFUCGALACGLCGAL14ACGLCGALGLUSIDEte_neg	35	-0.890989	0.173352	0.230963	ACGALFUCGALACGALFUCGALACGLCGAL14ACGLCGALGLUSIDEte	Blood group intracellular transport	Transport, extracellular
R_ACGALFUCGALACGALFUCGALACGLCGAL14ACGLCGALGLUSIDEtg_pos	35	-0.890989	0.173352	0.230963	ACGALFUCGALACGALFUCGALACGLCGAL14ACGLCGALGLUSIDEtg	Blood group intracellular transport	Transport, golgi apparatus
R_ACGALK2_pos	27	-1.17108	0.0513444	0.0854271	ACGALK2	N-acetylgalactosamine kinase (ITP)	Aminosugar metabolism
R_ACGALK_pos	27	-1.15292	0.0513444	0.0854271	ACGALK	N-acetylgalactosamine kinase	Aminosugar metabolism
R_ACGALtlg_neg	25	-1.26001	0.0357001	0.0633743	ACGALtlg	N-acetyl-galactosamine intracellular transport	Transport, golgi apparatus
R_ACGALtly_pos	32	-1.04324	0.114466	0.165831	ACGALtly	N-acetyl-galactosamine lysosomal efflux	Transport, lysosomal
R_ACGALtr_pos	24	-0.815249	0.0294798	0.0541191	ACGALtr	N-Acetylgalactosamine Export	Transport, extracellular
R_ACGAM2E_neg	72	0.739081	0.251205	0.307811	ACGAM2E	N-acetylglucosamine 2-epimerase	Aminosugar metabolism
R_ACGAM2E_pos	32	-0.739071	0.114466	0.165831	ACGAM2E	N-acetylglucosamine 2-epimerase	Aminosugar metabolism
R_ACGAM6PS_pos	25	-0.774959	0.0357001	0.0633743	ACGAM6PS	N acetylglucosamine 6 phosphate synthase	Aminosugar metabolism
R_ACGAMK_pos	71	0.740841	0.28162	0.338451	ACGAMK	N-acetylglucosamine kinase	Aminosugar metabolism
R_ACGAMPM_pos	74	0.762541	0.197116	0.255164	ACGAMPM	Phosphoacetylglucosamine mutase	Aminosugar metabolism
R_ACGBGBSIDEtg_neg	25	-1.26001	0.0357001	0.0633743	ACGBGBSIDEtg	Acgbgbside hs intracellular transport	Transport, golgi apparatus
R_ACGBGBSIDEtl_pos	25	-1.26001	0.0357001	0.0633743	ACGBGBSIDEtl	Acgbgbside hs intracellular transport	Transport, lysosomal
R_ACGLUtd_pos	13	-1.4782	0.00205831	0.00867112	ACGLUtd	Transport of N-Acetyl-L-Glutamate, Diffusion	Transport, extracellular
R_ACGLUtm_neg	13	-1.4782	0.00205831	0.00867112	ACGLUtm	Transport of N-Acetyl-L-Glutamate, Mitochondrial	Transport, mitochondrial
R_ACGLYtc_pos	28	-0.909728	0.0610009	0.0998401	ACGLYtc	Intra-Cellular Transport of Acetyl-Glycine	Transport, mitochondrial
R_ACGLYte_pos	28	-0.909728	0.0610009	0.0998401	ACGLYte	Extracellular Transport of Acetyl-Glycine	Transport, extracellular
R_ACGPID_pos	24	-1.04057	0.0294798	0.0541191	ACGPID	N-acetylglucosaminylphosphatidylinositol deacetylase	Phosphatidylinositol phosphate metabolism
R_ACGSm_pos	13	-1.4782	0.00205831	0.00867112	ACGSm	N acteylglutamate synthase mitochondrial	Urea cycle
R_ACHEe_pos	59	0.109569	0.809405	0.83432	ACHEe	Acetylcholinesterase	Glycerophospholipid metabolism
R_ACHOMm_pos	8	-1.76369	0.000379909	0.00406902	ACHOMm	Acetylation of Homoserine	Glycine, serine, alanine, and threonine metabolism
R_ACHOMte_pos	8	-1.76369	0.000379909	0.00406902	ACHOMte	Transport of Acetyl Homoserine, Extracellular	Transport, extracellular
R_ACHOMtm_pos	8	-1.76369	0.000379909	0.00406902	ACHOMtm	Transport of Acetyl Homoserine, Intracellular	Transport, mitochondrial
R_ACHVESSEC_1_pos	7	-1.78684	0.000255163	0.00327288	ACHVESSEC_1	Acetylcholine Secretion via Secretory Vesicle (ATP Driven)	Transport, extracellular
R_ACILEm_pos	29	-1.10973	0.0720013	0.114535	ACILEm	Acetylation of Isoleucine	Valine, leucine, and isoleucine metabolism
R_ACILEte_pos	29	-1.10973	0.0720013	0.114535	ACILEte	Transport of Acetyl Isoleucine, Extracellular	Transport, extracellular
R_ACILEtm_pos	29	-1.10973	0.0720013	0.114535	ACILEtm	Transport of Acetyl Isoleucine, Intracellular	Transport, mitochondrial
R_ACITL_pos	22	-0.991868	0.0196645	0.0392806	ACITL	ATP-Citrate lyase	Citric acid cycle
R_ACLEUm_pos	30	-1.08603	0.0845213	0.129511	ACLEUm	Acetylation of Leucine	Valine, leucine, and isoleucine metabolism
R_ACLEUte_pos	30	-1.08603	0.0845213	0.129511	ACLEUte	Transport of Acetyl Leucine, Extracellular	Transport, extracellular
R_ACLEUtm_pos	30	-1.08603	0.0845213	0.129511	ACLEUtm	Transport of Acetyl Leucine, Intracellular	Transport, mitochondrial
R_ACLYSHYc_neg	39	-0.418249	0.28162	0.338451	ACLYSHYc	Hydrolysis of Acetyl-Lysine	Lysine metabolism
R_ACLYSHYc_pos	8	-1.75962	0.000379909	0.00406902	ACLYSHYc	Hydrolysis of Acetyl-Lysine	Lysine metabolism
R_ACLYSt_neg	30	-1.20564	0.0845213	0.129511	ACLYSt	Transport of Acetyl-Lysine, Extracellular	Transport, extracellular
R_ACLYSt_pos	39	-0.418249	0.28162	0.338451	ACLYSt	Transport of Acetyl-Lysine, Extracellular	Transport, extracellular
R_ACLYStm_pos	8	-1.76165	0.000379909	0.00406902	ACLYStm	Intracellular Transport of Acetyl-Lysine	Transport, extracellular
R_ACMPGLUChr_pos	13	-1.66114	0.00205831	0.00867112	ACMPGLUChr	Glucuronidation of acetaminophen in hepatocytes	Drug metabolism
R_ACMPGLUTTRsc_pos	20	-1.46647	0.0127184	0.0283932	ACMPGLUTTRsc	ACMPGLUTTRsc	Drug metabolism
R_ACMPGLUTdt_neg	58	0.0485111	0.863267	0.881914	ACMPGLUTdt	Uptake of acetaminophen-glutathione-conjugate into the enterocytes	Drug metabolism
R_ACMPGLUTdt_pos	58	0.0439714	0.863267	0.881914	ACMPGLUTdt	Uptake of acetaminophen-glutathione-conjugate into the enterocytes	Drug metabolism
R_ACMPGLUTitr_pos	20	-1.46647	0.0127184	0.0283932	ACMPGLUTitr	ACMPGLUTitr	Drug metabolism
R_ACMPGLUTtep_pos	58	0.0485111	0.863267	0.881914	ACMPGLUTtep	Efflux of acetaminophen-glutathione-conjugate from enterocytes into portal blood	Drug metabolism
R_ACMPGLUTthc_pos	58	0.0485111	0.863267	0.881914	ACMPGLUTthc	Uptake of acetaminophen-glutathione-conjugate by the hepatocytes	Drug metabolism
R_ACMPGLUitr_pos	13	-1.66114	0.00205831	0.00867112	ACMPGLUitr	ACMPGLUitr	Drug metabolism
R_ACMPGLUtep_pos	77	0.783138	0.132118	0.185317	ACMPGLUtep	Efflux of acetaminophen-glucuronide-conjugate from enterocytes into portal blood	Drug metabolism
R_ACMPGLUthc_pos	77	0.783138	0.132118	0.185317	ACMPGLUthc	Uptake of acetaminophen-glucuronide-conjugate by the hepatocytes	Drug metabolism
R_ACMPShc_pos	37	-0.780888	0.223024	0.28101	ACMPShc	Sulphation of acetaminophen in hepatocytes	Drug metabolism
R_ACMPdt_neg	58	0.0485111	0.863267	0.881914	ACMPdt	Uptake of acetaminophen by enterocytes	Drug metabolism
R_ACMPdt_pos	10	-1.76918	0.00078817	0.00513616	ACMPdt	Uptake of acetaminophen by enterocytes	Drug metabolism
R_ACMPitr_pos	10	-1.83621	0.00078817	0.00513616	ACMPitr	ACMPitr	Drug metabolism
R_ACMPthc_pos	58	0.0485111	0.863267	0.881914	ACMPthc	Uptake of acetaminophen by the hepatocytes	Drug metabolism
R_ACMPtu_pos	10	-1.76918	0.00078817	0.00513616	ACMPtu	Efflux of acetaminophen by P-gp from the enterocytes into lumen	Drug metabolism
R_ACN13ACNGALGBSIDEte_pos	29	-0.954568	0.0720013	0.114535	ACN13ACNGALGBSIDEte	ACN13ACNGALGBSIDEte	Transport, extracellular
R_ACN13ACNGALGBSIDEtg_neg	29	-0.954568	0.0720013	0.114535	ACN13ACNGALGBSIDEtg	Acn13acngalgbside hs intracellular transport	Transport, golgi apparatus
R_ACN23ACNGALGBSIDEte_pos	29	-0.954568	0.0720013	0.114535	ACN23ACNGALGBSIDEte	ACN23ACNGALGBSIDEte	Transport, extracellular
R_ACN23ACNGALGBSIDEtg_neg	29	-0.954568	0.0720013	0.114535	ACN23ACNGALGBSIDEtg	Acn23acngalgbside intracellular transport	Transport, golgi apparatus
R_ACNACNGAL14ACGLCGALGLUSIDEte_neg	27	-0.987377	0.0513444	0.0854271	ACNACNGAL14ACGLCGALGLUSIDEte	Blood group intracellular transport	Transport, extracellular
R_ACNACNGAL14ACGLCGALGLUSIDEtg_pos	18	-1.35335	0.00794974	0.0203633	ACNACNGAL14ACGLCGALGLUSIDEtg	Blood group intracellular transport	Transport, golgi apparatus
R_ACNACNGALGBSIDEte_pos	22	-1.16981	0.0196645	0.0392806	ACNACNGALGBSIDEte	ACNACNGALGBSIDEte	Transport, extracellular
R_ACNACNGALGBSIDEtg_neg	22	-1.16981	0.0196645	0.0392806	ACNACNGALGBSIDEtg	Acnacngalgbside hs intracellular transport	Transport, golgi apparatus
R_ACNAM9PL2_pos	33	-1.06234	0.132118	0.185317	ACNAM9PL2	N-Acetylneuraminate 9-phosphate pyruvate-lyase (pyruvate-phosphorylating)	Aminosugar metabolism
R_ACNAM9PL_pos	29	-0.929876	0.0720013	0.114535	ACNAM9PL	N-Acetylneuraminate 9-phosphate pyruvate-lyase (pyruvate-phosphorylating)	Aminosugar metabolism
R_ACNAMPH_pos	29	-0.929876	0.0720013	0.114535	ACNAMPH	N-Acetylneuraminate 9-phosphate phosphohydrolase	Aminosugar metabolism
R_ACNAMlt_neg	18	-1.28791	0.00794974	0.0203633	ACNAMlt	N-acetylneuraminate transport into lysososme	Transport, lysosomal
R_ACNAMt2_pos	30	-1.29855	0.0845213	0.129511	ACNAMt2	N-acetylneuraminate proton symport	Transport, extracellular
R_ACNAMtn_pos	28	-1.03901	0.0610009	0.0998401	ACNAMtn	N-acetylneuraminate nuclear import	Transport, nuclear
R_ACNAMtr_pos	30	-1.29855	0.0845213	0.129511	ACNAMtr	N-Acetylneuraminate Export	Transport, extracellular
R_ACNGALACGLCGAL14ACGLCGALGLUSIDEte_neg	21	-1.1477	0.0158711	0.033564	ACNGALACGLCGAL14ACGLCGALGLUSIDEte	Blood group intracellular transport	Transport, extracellular
R_ACNGALACGLCGAL14ACGLCGALGLUSIDEtg_pos	16	-1.3686	0.00478572	0.014183	ACNGALACGLCGAL14ACGLCGALGLUSIDEtg	Blood group intracellular transport	Transport, golgi apparatus
R_ACNMCT_pos	57	0.00282407	0.91769	0.928075	ACNMCT	CTP:N-acylneuraminate cytidylyltransferase	Aminosugar metabolism
R_ACNML_neg	20	-1.31857	0.0127184	0.0283932	ACNML	N-Acetylneuraminate lyase	Aminosugar metabolism
R_ACNML_pos	28	-1.00489	0.0610009	0.0998401	ACNML	N-Acetylneuraminate lyase	Aminosugar metabolism
R_ACOAD10m_pos	38	-0.459428	0.251205	0.307811	ACOAD10m	2-methylacyl-coa dehydrogenase, trans-2-Methylbut-2-enoyl-CoA forming	Valine, leucine, and isoleucine metabolism
R_ACOAD1fm_pos	40	-0.712909	0.314372	0.369235	ACOAD1fm	Acyl-CoA dehydrogenase (butanoyl-CoA), mitochondrial	Butanoate metabolism
R_ACOAD8m_pos	66	0.208014	0.467855	0.519407	ACOAD8m	Isovaleryl-coa dehydrogenase	Valine, leucine, and isoleucine metabolism
R_ACOAD9m_pos	34	-0.615541	0.151737	0.207652	ACOAD9m	2-methylacyl-coa dehydrogenase, 2-Methylprop-2-enoyl-CoA forming	Valine, leucine, and isoleucine metabolism
R_ACOADH100_m_pos	42	-0.508054	0.386679	0.441319	ACOADH100_m	Acyl-CoA dehydrogenase (10:0)	Fatty acid oxidation
R_ACOADH120_m_pos	42	-0.508263	0.386679	0.441319	ACOADH120_m	Acyl-CoA dehydrogenase (12:0)	Fatty acid oxidation
R_ACOADH160_m_pos	42	-0.507674	0.386679	0.441319	ACOADH160_m	Acyl-CoA dehydrogenase (16:0)	Fatty acid oxidation
R_ACOADH60_m_pos	40	-0.540775	0.314372	0.369235	ACOADH60_m	Acyl-CoA dehydrogenase (6:0)	Fatty acid oxidation
R_ACOAH_neg	48	-0.32104	0.653903	0.692175	ACOAH	Acetyl-CoA hydrolase	Pyruvate metabolism
R_ACOAHim_pos	22	-1.03557	0.0196645	0.0392806	ACOAHim	Acetyl CoA hydrolase mitochondrial irreversible	Pyruvate metabolism
R_ACOAO4p_pos	2	-2.0565	2.26811e-05	0.00110304	ACOAO4p	Acyl CoA oxidase decanoyl CoA peroxisomal	Fatty acid oxidation
R_ACOAO5p_pos	2	-2.0565	2.26811e-05	0.00110304	ACOAO5p	Acyl CoA oxidase dodecanoyl CoA peroxisomal	Fatty acid oxidation
R_ACOAO7p_pos	6	-2.01409	0.000170109	0.00267261	ACOAO7p	Acyl CoA oxidase hexadecanoyl CoA peroxisomal	Fatty acid oxidation
R_ACOAO8p_pos	1	-2.1604	1.13406e-05	0.00109147	ACOAO8p	Acyl CoA oxidase octadecanoyl CoA peroxisomal	Fatty acid oxidation
R_ACOAR2m_neg	43	-0.581032	0.426167	0.479194	ACOAR2m	Trans-2-enoyl-CoA reductase (NADPH) (C6:0)	Fatty acid oxidation
R_ACOAR2m_pos	44	-0.47975	0.467855	0.519407	ACOAR2m	Trans-2-enoyl-CoA reductase (NADPH) (C6:0)	Fatty acid oxidation
R_ACOAR4m_neg	16	-1.35551	0.00478572	0.014183	ACOAR4m	Trans-2-enoyl-CoA reductase (NADPH) (C10:0)	Fatty acid oxidation
R_ACOAR4m_pos	47	-0.399166	0.60473	0.64659	ACOAR4m	Trans-2-enoyl-CoA reductase (NADPH) (C10:0)	Fatty acid oxidation
R_ACOAR5m_neg	15	-1.3205	0.00365166	0.011969	ACOAR5m	Trans-2-enoyl-CoA reductase (NADPH) (C12:0)	Fatty acid oxidation
R_ACOAR5m_pos	47	-0.387289	0.60473	0.64659	ACOAR5m	Trans-2-enoyl-CoA reductase (NADPH) (C12:0)	Fatty acid oxidation
R_ACOAR7m_neg	44	-0.516888	0.467855	0.519407	ACOAR7m	Trans-2-enoyl-CoA reductase (NADPH) (C16:0)	Fatty acid oxidation
R_ACOAR7m_pos	47	-0.393561	0.60473	0.64659	ACOAR7m	Trans-2-enoyl-CoA reductase (NADPH) (C16:0)	Fatty acid oxidation
R_ACODA_pos	35	-0.651532	0.173352	0.230963	ACODA	Acetylornithine deacetylase	Urea cycle
R_ACONT_neg	66	0.473534	0.467855	0.519407	ACONT	Aconitate hydratase	Citric acid cycle
R_ACONT_pos	66	0.473534	0.467855	0.519407	ACONT	Aconitate hydratase	Citric acid cycle
R_ACONTm_neg	66	0.473534	0.467855	0.519407	ACONTm	Aconitate hydratase	Citric acid cycle
R_ACONTm_pos	29	-0.64461	0.0720013	0.114535	ACONTm	Aconitate hydratase	Citric acid cycle
R_ACORNt_neg	35	-0.651532	0.173352	0.230963	ACORNt	Diffusion of N(2)-Acetyl-L-Ornithine	Transport, extracellular
R_ACOX22x_pos	10	-1.78584	0.00078817	0.00513616	ACOX22x	Acyl-Coenzyme A oxidase 2, branched chain	Bile acid synthesis
R_ACOX2x_pos	16	-1.47754	0.00478572	0.014183	ACOX2x	Acyl-Coenzyme A oxidase 2, branched chain	Bile acid synthesis
R_ACP1_FMN_pos	27	-0.95669	0.0513444	0.0854271	ACP1_FMN	Acid phosphatase (FMN)	Vitamin B2 metabolism
R_ACP1e_pos	51	-0.189986	0.809405	0.83432	ACP1e	Acid phosphatase extracellular secreted	Transport, extracellular
R_ACRNte_neg	23	-1.4122	0.0241554	0.0462895	ACRNte	Transport of O-Acetylcarnitine	Transport, extracellular
R_ACRNte_pos	9	-1.6849	0.000550018	0.00467566	ACRNte	Transport of O-Acetylcarnitine	Transport, extracellular
R_ACRNtm_neg	63	0.397529	0.60473	0.64659	ACRNtm	O acetylcarnintine transport into mitochondria via diffusion	Transport, mitochondrial
R_ACRNtm_pos	63	0.397529	0.60473	0.64659	ACRNtm	O acetylcarnintine transport into mitochondria via diffusion	Transport, mitochondrial
R_ACRNtp_neg	18	-1.50519	0.00794974	0.0203633	ACRNtp	Acetylcarnitine transport out of peroxisome	Transport, peroxisomal
R_ACRNtp_pos	18	-1.5074	0.00794974	0.0203633	ACRNtp	Acetylcarnitine transport out of peroxisome	Transport, peroxisomal
R_ACRNtr_neg	23	-1.4122	0.0241554	0.0462895	ACRNtr	Transport of Acetyl Carnitine	Transport, extracellular
R_ACRNtr_pos	9	-1.6849	0.000550018	0.00467566	ACRNtr	Transport of Acetyl Carnitine	Transport, extracellular
R_ACS2_pos	38	-0.715418	0.251205	0.307811	ACS2	Acetyl-CoA synthase (propionate)	Propanoate metabolism
R_ACSRTNMT_pos	15	-1.52101	0.00365166	0.011969	ACSRTNMT	S-Adenosyl-L-homocysteine:N-acetylserotonin O-methyltransferase	Tryptophan metabolism
R_ACS_pos	65	-0.0648945	0.511562	0.559223	ACS	Acetyl-CoA synthetase	Glycolysis/gluconeogenesis
R_ACSm_pos	83	1.00126	0.0513444	0.0854271	ACSm	Acetyl CoA synthetase	Glycolysis/gluconeogenesis
R_ACTHRtc_pos	32	-0.980906	0.114466	0.165831	ACTHRtc	Intra-Cellular Transport of Acetyl-Threonine	Transport, mitochondrial
R_ACTHRte_pos	32	-0.980906	0.114466	0.165831	ACTHRte	Extracellular Transport of Acetyl-Threonine	Transport, extracellular
R_ACTLMO_pos	7	-1.88353	0.000255163	0.00327288	ACTLMO	Acetol monooxygenase	Pyruvate metabolism
R_ACTNMO_pos	6	-2.03169	0.000170109	0.00267261	ACTNMO	Acetone monooxygenase	Pyruvate metabolism
R_ACTYRm_pos	18	-1.36459	0.00794974	0.0203633	ACTYRm	Acetylation of Tyrosine	Tyrosine metabolism
R_ACTYRtc_pos	18	-1.36459	0.00794974	0.0203633	ACTYRtc	Transport of N-Acetyl-Tyrosine into Cytosol	Transport, mitochondrial
R_ACTYRte_pos	18	-1.36459	0.00794974	0.0203633	ACTYRte	Secretion of N-Acetyl-Tyrosine	Transport, extracellular
R_ACYP_pos	32	-0.930365	0.114466	0.165831	ACYP	Acylphosphatase	Glycolysis/gluconeogenesis
R_ACt2m_neg	11	-1.70458	0.00110004	0.00641245	ACt2m	Acetate mitochondrial transport via proton symport	Transport, mitochondrial
R_ACt2m_pos	73	0.423028	0.223024	0.28101	ACt2m	Acetate mitochondrial transport via proton symport	Transport, mitochondrial
R_ACt2r_neg	34	-0.840444	0.151737	0.207652	ACt2r	Acetate reversible transport via proton symport	Transport, extracellular
R_ACt2r_pos	34	-0.840444	0.151737	0.207652	ACt2r	Acetate reversible transport via proton symport	Transport, extracellular
R_ACtg_neg	19	-1.43807	0.0100931	0.0241208	ACtg	Acetate transport, Golgi apparatus	Transport, golgi apparatus
R_ACtp_neg	5	-1.9296	0.000107735	0.00207961	ACtp	Acetate transport peroxisomal	Transport, peroxisomal
R_ADADir_pos	36	-0.77531	0.197116	0.255164	ADADir	Deoxycytidine kinase	Pyrimidine catabolism
R_ADA_pos	60	0.00879012	0.756444	0.785613	ADA	Adenosine deaminase	Purine catabolism
R_ADAe_pos	55	-0.129443	1	1	ADAe	Adenosine deaminase, extracellular	Purine catabolism
R_ADCim_pos	24	-1.09771	0.0294798	0.0541191	ADCim	Acetoacetate decarboxylation (irreversible), mitochondrial	Propanoate metabolism
R_ADD_pos	49	-0.323518	0.704504	0.739934	ADD	Adenine deaminase	Purine catabolism
R_ADEt_neg	37	-0.444911	0.223024	0.28101	ADEt	Adenine transport via diffusion	Transport, extracellular
R_ADEt_pos	35	-0.67278	0.173352	0.230963	ADEt	Adenine transport via diffusion	Transport, extracellular
R_ADK1_neg	37	-0.52187	0.223024	0.28101	ADK1	Adenylate kinase	Nucleotide interconversion
R_ADK1_pos	37	-0.52187	0.223024	0.28101	ADK1	Adenylate kinase	Nucleotide interconversion
R_ADK1m_neg	77	1.23305	0.132118	0.185317	ADK1m	Adenylate kinase mitochondrial	Nucleotide interconversion
R_ADK1m_pos	77	1.23305	0.132118	0.185317	ADK1m	Adenylate kinase mitochondrial	Nucleotide interconversion
R_ADK3_neg	37	-0.52187	0.223024	0.28101	ADK3	Adentylate kinase (GTP)	Nucleotide interconversion
R_ADK3_pos	37	-0.52187	0.223024	0.28101	ADK3	Adentylate kinase (GTP)	Nucleotide interconversion
R_ADK3m_neg	77	1.23305	0.132118	0.185317	ADK3m	Adentylate kinase GTP	Nucleotide interconversion
R_ADK3m_pos	77	1.23305	0.132118	0.185317	ADK3m	Adentylate kinase GTP	Nucleotide interconversion
R_ADKd_neg	37	-0.541872	0.223024	0.28101	ADKd	Adenylate kinase (d form)	Nucleotide interconversion
R_ADKd_pos	37	-0.541872	0.223024	0.28101	ADKd	Adenylate kinase (d form)	Nucleotide interconversion
R_ADMDC_pos	14	-1.45063	0.00276143	0.0101701	ADMDC	Adenosylmethionine decarboxylase	Arginine and proline metabolism
R_ADNCYC_pos	59	0.0610082	0.809405	0.83432	ADNCYC	Adenylate cyclase	Nucleotide interconversion
R_ADNK1_pos	48	-0.288186	0.653903	0.692175	ADNK1	Adenosine kinase	Nucleotide interconversion
R_ADNK1m_pos	43	-0.497056	0.426167	0.479194	ADNK1m	Adenosine kinase, mitochondria	Nucleotide interconversion
R_ADNK3_pos	13	-1.63767	0.00205831	0.00867112	ADNK3	Adenosine kinase	Purine synthesis
R_ADNK4_pos	14	-1.6376	0.00276143	0.0101701	ADNK4	Adenosine kinase	Purine synthesis
R_ADNt2_neg	92	1.43322	0.00794974	0.0203633	ADNt2	Adenosine transport in via proton symport	Transport, extracellular
R_ADNt2_pos	97	1.5636	0.00205831	0.00867112	ADNt2	Adenosine transport in via proton symport	Transport, extracellular
R_ADNt4_pos	71	0.672891	0.28162	0.338451	ADNt4	Adenosine transport (Na/Adn cotransport)	Transport, extracellular
R_ADNt5_pos	94	1.44767	0.00478572	0.014183	ADNt5	Adenosine transport (1:2 Na/Adn cotransport)	Transport, extracellular
R_ADNt_neg	71	0.672891	0.28162	0.338451	ADNt	Adenosine facilated transport in cytosol	Transport, extracellular
R_ADNt_pos	97	1.56431	0.00205831	0.00867112	ADNt	Adenosine facilated transport in cytosol	Transport, extracellular
R_ADNtl_pos	23	-1.26705	0.0241554	0.0462895	ADNtl	Adenosine facilated transport from lysosome	Transport, lysosomal
R_ADNtm_neg	23	-1.16358	0.0241554	0.0462895	ADNtm	Equilibrative nucleoside transporter, mitochondrial	Transport, mitochondrial
R_ADNtm_pos	32	-0.876529	0.114466	0.165831	ADNtm	Equilibrative nucleoside transporter, mitochondrial	Transport, mitochondrial
R_ADPACDAc_pos	9	-1.73613	0.000550018	0.00467566	ADPACDAc	Activation of adipic acid for formation of adipoyl carnitine	Fatty acid oxidation
R_ADPACTD_pos	9	-1.73509	0.000550018	0.00467566	ADPACTD	Transport into cytosol (diffusion)	Fatty acid oxidation
R_ADPACtd_neg	11	-1.8798	0.00110004	0.00641245	ADPACtd	Transport of Adipic Acid, Diffusion	Transport, extracellular
R_ADPACtd_pos	2	-2.42815	2.26811e-05	0.00110304	ADPACtd	Transport of Adipic Acid, Diffusion	Transport, extracellular
R_ADPCOACROT_neg	9	-1.73509	0.000550018	0.00467566	ADPCOACROT	Production of adipoyl carnitine	Fatty acid oxidation
R_ADPCOACROT_pos	1	-2.45271	1.13406e-05	0.00109147	ADPCOACROT	Production of adipoyl carnitine	Fatty acid oxidation
R_ADPCOAPTE_pos	9	-1.73509	0.000550018	0.00467566	ADPCOAPTE	Thioesterification of adipoyl coA for release into cytosol	Fatty acid oxidation
R_ADPMAN_pos	31	-0.927239	0.0986176	0.146558	ADPMAN	ADPmannose diphosphatase	Nucleotide interconversion
R_ADPOHc_neg	26	-1.368	0.0429637	0.0733635	ADPOHc	Hydroxylation of 2-Oxoadipate	Lysine metabolism
R_ADPOHc_pos	27	-1.0401	0.0513444	0.0854271	ADPOHc	Hydroxylation of 2-Oxoadipate	Lysine metabolism
R_ADPOHt_neg	26	-1.368	0.0429637	0.0733635	ADPOHt	Secretion of 2-Hydroxyadipic Acid	Transport, extracellular
R_ADPOHt_pos	27	-1.0401	0.0513444	0.0854271	ADPOHt	Secretion of 2-Hydroxyadipic Acid	Transport, extracellular
R_ADPRDP_pos	53	-0.196449	0.91769	0.928075	ADPRDP	ADPribose diphosphatase	Nucleotide interconversion
R_ADPRIBt_pos	56	0.0982865	0.972539	0.977296	ADPRIBt	ADPribose transport	Transport, extracellular
R_ADPT_pos	22	-1.35665	0.0196645	0.0392806	ADPT	Adenine phosphoribosyltransferase	Nucleotide salvage pathway
R_ADRNCOAtx_neg	4	-2.23524	6.80434e-05	0.00160907	ADRNCOAtx	Fatty acid intracellular transport	Transport, peroxisomal
R_ADRNCOAtx_pos	2	-2.53769	2.26811e-05	0.00110304	ADRNCOAtx	Fatty acid intracellular transport	Transport, peroxisomal
R_ADRNCPT1_pos	15	-1.34374	0.00365166	0.011969	ADRNCPT1	Carnitine O-palmitoyltransferase	Fatty acid oxidation
R_ADRNCPT2_pos	15	-1.34374	0.00365166	0.011969	ADRNCPT2	Carnitine transferase	Fatty acid oxidation
R_ADRNCRNt_neg	46	-0.254572	0.557264	0.599564	ADRNCRNt	Transport into the mitochondria (carnitine)	Fatty acid oxidation
R_ADRNCRNt_pos	46	-0.254572	0.557264	0.599564	ADRNCRNt	Transport into the mitochondria (carnitine)	Fatty acid oxidation
R_ADRNLPVESSEC_1_pos	55	0.0623381	1	1	ADRNLPVESSEC_1	Adrenaline Secretion via Secretory Vesicle (ATP Driven)	Transport, extracellular
R_ADRNLtu_neg	15	-1.49053	0.00365166	0.011969	ADRNLtu	Adrenaline (epinephrine) transport, uniport	Transport, extracellular
R_ADRNLtu_pos	55	0.0629211	1	1	ADRNLtu	Adrenaline (epinephrine) transport, uniport	Transport, extracellular
R_ADRNt_neg	31	-0.775755	0.0986176	0.146558	ADRNt	Fatty acid transport via diffusion	Transport, extracellular
R_ADRNt_pos	21	-1.31458	0.0158711	0.033564	ADRNt	Fatty acid transport via diffusion	Transport, extracellular
R_ADSK_pos	44	-0.297497	0.467855	0.519407	ADSK	Adenylyl-sulfate kinase	Nucleotide interconversion
R_ADSL1r_pos	66	0.175504	0.467855	0.519407	ADSL1r	Adenylsuccinate lyase	Nucleotide interconversion
R_ADSL2r_pos	60	0.16158	0.756444	0.785613	ADSL2r	Adenylosuccinate lyase	Purine synthesis
R_ADSS_pos	66	0.175504	0.467855	0.519407	ADSS	Adenylosuccinate synthase	Nucleotide interconversion
R_AFLATOXINte_pos	20	-1.53108	0.0127184	0.0283932	AFLATOXINte	Xenobiotic transport	Transport, extracellular
R_AG13T16g_pos	16	-1.52863	0.00478572	0.014183	AG13T16g	N-acetyllactosaminide beta-1,3-N-acetylglucosaminyltransferase, Golgi apparatus	Keratan sulfate synthesis
R_AG13T17g_pos	16	-1.52863	0.00478572	0.014183	AG13T17g	N-acetyllactosaminide beta-1,3-N-acetylglucosaminyltransferase, Golgi apparatus	Keratan sulfate synthesis
R_AG13T18g_pos	16	-1.52863	0.00478572	0.014183	AG13T18g	N-acetyllactosaminide beta-1,3-N-acetylglucosaminyltransferase, Golgi apparatus	Keratan sulfate synthesis
R_AG13T1g_pos	15	-1.47205	0.00365166	0.011969	AG13T1g	N-acetyllactosaminide beta-1,3-N-acetylglucosaminyltransferase, Golgi apparatus	Keratan sulfate synthesis
R_AG13T2g_pos	15	-1.47205	0.00365166	0.011969	AG13T2g	N-acetyllactosaminide beta-1,3-N-acetylglucosaminyltransferase, Golgi apparatus	Keratan sulfate synthesis
R_AG13T3g_pos	15	-1.47205	0.00365166	0.011969	AG13T3g	N-acetyllactosaminide beta-1,3-N-acetylglucosaminyltransferase, Golgi apparatus	Keratan sulfate synthesis
R_AGDC_pos	27	-0.721263	0.0513444	0.0854271	AGDC	N-acetylglucosamine-6-phosphate deacetylase	Aminosugar metabolism
R_AGMTm_pos	25	-0.870126	0.0357001	0.0633743	AGMTm	Agmatinase (m)	Arginine and proline metabolism
R_AGMt_m_neg	19	-1.43926	0.0100931	0.0241208	AGMt_m	Agmatine transport from cytosol to the mitochondria	Transport, mitochondrial
R_AGMt_m_pos	32	-0.959577	0.114466	0.165831	AGMt_m	Agmatine transport from cytosol to the mitochondria	Transport, mitochondrial
R_AGPAT1_1_pos	35	-0.828181	0.173352	0.230963	AGPAT1_1	1-Acylglycerol-3-Phosphate O-Acyltransferase 1	Triacylglycerol synthesis
R_AGPAT4_pos	8	-1.97593	0.000379909	0.00406902	AGPAT4	1-Acylglycerol-3-Phosphate O-Acyltransferase 1 (C18:2)	Glycerophospholipid metabolism
R_AGPOP_pos	95	1.42977	0.00365166	0.011969	AGPOP	DGTP:pyruvate 2-O-phosphotransferase, cytosol	Glycolysis/gluconeogenesis
R_AGRMte_neg	32	-0.959577	0.114466	0.165831	AGRMte	Transport of Agmatinium into Extracellular Space	Transport, extracellular
R_AGRMte_pos	19	-1.43926	0.0100931	0.0241208	AGRMte	Transport of Agmatinium into Extracellular Space	Transport, extracellular
R_AGTim_pos	12	-1.70538	0.00151964	0.0075044	AGTim	Alanine---glyoxylate aminotransferase	Alanine and aspartate metabolism
R_AGTix_pos	15	-1.62402	0.00365166	0.011969	AGTix	Alanine---glyoxylate aminotransferase, glyoxysome	Alanine and aspartate metabolism
R_AHANDROSTANGLCte_pos	19	-1.39038	0.0100931	0.0241208	AHANDROSTANGLCte	Glucuronidated compound transport	Transport, extracellular
R_AHANDROSTANGLCtr_neg	19	-1.39038	0.0100931	0.0241208	AHANDROSTANGLCtr	Glucuronidated compound transport	Transport, endoplasmic reticular
R_AHANDROSTANte_pos	10	-1.76918	0.00078817	0.00513616	AHANDROSTANte	Transport of 3Alpha-Hydroxy-5Beta-Androstan-17-One, Extracellular	Transport, extracellular
R_AHANDROSTANtr_pos	10	-1.76918	0.00078817	0.00513616	AHANDROSTANtr	Transport of 3Alpha-Hydroxy-5Beta-Androstan-17-One, Endoplasmatic Reticulum	Transport, endoplasmic reticular
R_AHCYSte_neg	23	-1.31794	0.0241554	0.0462895	AHCYSte	Transport of S-adenosyl-L-homocysteine	Transport, extracellular
R_AHCYSte_pos	30	-1.16158	0.0845213	0.129511	AHCYSte	Transport of S-adenosyl-L-homocysteine	Transport, extracellular
R_AHCYStm_neg	36	-0.988199	0.197116	0.255164	AHCYStm	S adenosyl L homocysteine reversible transport mitochondrial	Transport, mitochondrial
R_AHCYStm_pos	36	-0.988199	0.197116	0.255164	AHCYStm	S adenosyl L homocysteine reversible transport mitochondrial	Transport, mitochondrial
R_AHCYStr_neg	19	-1.38679	0.0100931	0.0241208	AHCYStr	S-Adenosyl-L-homocysteine intracellular diffusion	Transport, endoplasmic reticular
R_AHCYStr_pos	18	-1.60623	0.00794974	0.0203633	AHCYStr	S-Adenosyl-L-homocysteine intracellular diffusion	Transport, endoplasmic reticular
R_AHCi_neg	19	-1.51978	0.0100931	0.0241208	AHCi	Adenosylhomocysteinase	Methionine and cysteine metabolism
R_AHCi_pos	35	-0.80103	0.173352	0.230963	AHCi	Adenosylhomocysteinase	Methionine and cysteine metabolism
R_AHEXASE2ly_pos	26	-1.14714	0.0429637	0.0733635	AHEXASE2ly	Beta-N-acetylhexosaminidase, lysosomal	N-glycan degradation
R_AHEXASEly_pos	19	-1.46439	0.0100931	0.0241208	AHEXASEly	Beta-N-acetylhexosaminidase, lysosomal	N-glycan degradation
R_AICART_neg	22	-1.28216	0.0196645	0.0392806	AICART	Phosphoribosylaminoimidazolecarboxamide formyltransferase	Purine synthesis
R_AICART_pos	60	0.155846	0.756444	0.785613	AICART	Phosphoribosylaminoimidazolecarboxamide formyltransferase	Purine synthesis
R_AICARte_neg	14	-1.64344	0.00276143	0.0101701	AICARte	Transport of 5-amino-1-(5-phospho-D-ribosyl)imidazole-4-carboxamide(2-)	Transport, extracellular
R_AICARte_pos	41	-0.439021	0.349369	0.403217	AICARte	Transport of 5-amino-1-(5-phospho-D-ribosyl)imidazole-4-carboxamide(2-)	Transport, extracellular
R_AIRCr_pos	60	0.16158	0.756444	0.785613	AIRCr	Phosphoribosylaminoimidazole carboxylase	Purine synthesis
R_AK2LGCHOLABCt_pos	9	-1.85762	0.000550018	0.00467566	AK2LGCHOLABCt	1-Alkyl 2-Acylglycerol 3-Phosphocholine Transport	Transport, extracellular
R_AK2LGCHOLt_pos	9	-1.85762	0.000550018	0.00467566	AK2LGCHOLt	1-Alkyl 2-Acylglycerol 3-Phosphocholine Transport, Vescicular	Transport, extracellular
R_AKGCITtm_neg	74	1.03693	0.197116	0.255164	AKGCITtm	Dicarboxylate/tricarboxylate carrier (akg:cit), mitochondrial	Transport, mitochondrial
R_AKGCITtm_pos	74	1.03693	0.197116	0.255164	AKGCITtm	Dicarboxylate/tricarboxylate carrier (akg:cit), mitochondrial	Transport, mitochondrial
R_AKGDm_pos	32	-0.784558	0.114466	0.165831	AKGDm	2-oxoglutarate dehydrogenase	Citric acid cycle
R_AKGICITtm_neg	74	1.03693	0.197116	0.255164	AKGICITtm	Dicarboxylate/tricarboxylate carrier (akg:icit), mitochondrial	Transport, peroxisomal
R_AKGICITtm_pos	74	1.03693	0.197116	0.255164	AKGICITtm	Dicarboxylate/tricarboxylate carrier (akg:icit), mitochondrial	Transport, peroxisomal
R_AKGMALtm_neg	74	1.05088	0.197116	0.255164	AKGMALtm	Dicarboxylate/tricarboxylate carrier (mal:akg), mitochondrial	Transport, mitochondrial
R_AKGMALtm_pos	76	1.18076	0.151737	0.207652	AKGMALtm	Dicarboxylate/tricarboxylate carrier (mal:akg), mitochondrial	Transport, mitochondrial
R_AKGt4_3_neg	67	0.509651	0.426167	0.479194	AKGt4_3	AKG transport via sodium symport	Transport, extracellular
R_AKGt4_3_pos	83	1.13869	0.0513444	0.0854271	AKGt4_3	AKG transport via sodium symport	Transport, extracellular
R_AKR1C1_pos	15	-1.59893	0.00365166	0.011969	AKR1C1	Aldo-keto reductase family 1, member C1 (chlordecone reductase; 3-alpha hydroxysteroid dehydrogenase, type I; dihydrodiol dehydrogenase 4)	Steroid metabolism
R_AKR1C41_pos	54	-0.0925547	0.972539	0.977296	AKR1C41	Aldo-keto reductase family 1, member C4 (chlordecone reductase; 3-alpha hydroxysteroid dehydrogenase, type I; dihydrodiol dehydrogenase 4)	Bile acid synthesis
R_AKR1C42_pos	54	-0.0925547	0.972539	0.977296	AKR1C42	Aldo-keto reductase family 1, member C4 (chlordecone reductase; 3-alpha hydroxysteroid dehydrogenase, type I; dihydrodiol dehydrogenase 4)	Bile acid synthesis
R_AKR1D2_pos	16	-1.50153	0.00478572	0.014183	AKR1D2	Aldo-keto reductase family 1, member D1 (delta 4-3-ketosteroid-5-beta-reductase)	Bile acid synthesis
R_AKR1D_pos	24	-1.17194	0.0294798	0.0541191	AKR1D	Aldo-keto reductase family 1, member D1 (delta 4-3-ketosteroid-5-beta-reductase)	Bile acid synthesis
R_ALAALACNc_neg	21	-1.17838	0.0158711	0.033564	ALAALACNc	Hydrolysis of Alanylalanine	Transport, extracellular
R_ALAALACNc_pos	77	0.748726	0.132118	0.185317	ALAALACNc	Hydrolysis of Alanylalanine	Transport, extracellular
R_ALAALAPEPT1tc_pos	76	0.733033	0.151737	0.207652	ALAALAPEPT1tc	Transport of Alanylalanine by the apical PEPT1 amino acid transporters across the brush border cells of the enterocytes of the intestine and renal cells	Transport, extracellular
R_ALAARGCYSr_neg	65	0.430706	0.511562	0.559223	ALAARGCYSr	Metabolism (Formation/Degradation) of AlaArgCys	Peptide metabolism
R_ALAARGCYSr_pos	71	0.563124	0.28162	0.338451	ALAARGCYSr	Metabolism (Formation/Degradation) of AlaArgCys	Peptide metabolism
R_ALAARGCYSt_neg	65	0.430706	0.511562	0.559223	ALAARGCYSt	Transport of AlaArgCys, Extracellular	Transport, extracellular
R_ALAARGCYSt_pos	71	0.563124	0.28162	0.338451	ALAARGCYSt	Transport of AlaArgCys, Extracellular	Transport, extracellular
R_ALAARGGLYr_neg	18	-1.30952	0.00794974	0.0203633	ALAARGGLYr	Metabolism (Formation/Degradation) of AlaArgGly	Peptide metabolism
R_ALAARGGLYr_pos	86	0.996432	0.0294798	0.0541191	ALAARGGLYr	Metabolism (Formation/Degradation) of AlaArgGly	Peptide metabolism
R_ALAARGGLYt_neg	18	-1.30952	0.00794974	0.0203633	ALAARGGLYt	Transport of AlaArgGly, Extracellular	Transport, extracellular
R_ALAARGGLYt_pos	86	0.996432	0.0294798	0.0541191	ALAARGGLYt	Transport of AlaArgGly, Extracellular	Transport, extracellular
R_ALAASNLEUr_neg	86	1.12945	0.0294798	0.0541191	ALAASNLEUr	Metabolism (Formation/Degradation) of AlaAsnLeu	Peptide metabolism
R_ALAASNLEUr_pos	55	0.0972899	1	1	ALAASNLEUr	Metabolism (Formation/Degradation) of AlaAsnLeu	Peptide metabolism
R_ALAASNLEUt_neg	86	1.12945	0.0294798	0.0541191	ALAASNLEUt	Transport of AlaAsnLeu, Extracellular	Transport, extracellular
R_ALAASNLEUt_pos	55	0.0972899	1	1	ALAASNLEUt	Transport of AlaAsnLeu, Extracellular	Transport, extracellular
R_ALAASNNaEx_pos	84	0.880585	0.0429637	0.0733635	ALAASNNaEx	L-alanine/L-asparagine Na-dependent exchange (Ala-L in)	Transport, extracellular
R_ALAATB0tc_pos	96	1.63596	0.00276143	0.0101701	ALAATB0tc	Transport of L-Alanine into the intestinal cells by ATB0 transporter	Transport, extracellular
R_ALAB0AT3tc_pos	73	1.06897	0.223024	0.28101	ALAB0AT3tc	Alanine Transport by B0At3	Transport, extracellular
R_ALACYSNaEx_pos	83	1.15071	0.0513444	0.0854271	ALACYSNaEx	L-alanine/L-cysteine Na-dependent exchange (Ala-L in)	Transport, extracellular
R_ALADGLNexR_neg	86	1.29284	0.0294798	0.0541191	ALADGLNexR	L-alanine/glutamine reversible exchange	Transport, extracellular
R_ALADGLNexR_pos	87	1.32619	0.0241554	0.0462895	ALADGLNexR	L-alanine/glutamine reversible exchange	Transport, extracellular
R_ALADGLYexR_neg	88	1.28208	0.0196645	0.0392806	ALADGLYexR	D-alanine/glycine reversible exchange	Transport, extracellular
R_ALADGLYexR_pos	89	1.32576	0.0158711	0.033564	ALADGLYexR	D-alanine/glycine reversible exchange	Transport, extracellular
R_ALAGLNNaEx_pos	86	1.04107	0.0294798	0.0541191	ALAGLNNaEx	L-alanine/L-glutamine Na-dependent exchange (Ala-L in)	Transport, extracellular
R_ALAGLNexR_neg	80	1.09699	0.0845213	0.129511	ALAGLNexR	L-alanine/glutamine reversible exchange	Transport, extracellular
R_ALAGLNexR_pos	80	1.09699	0.0845213	0.129511	ALAGLNexR	L-alanine/glutamine reversible exchange	Transport, extracellular
R_ALAGLYLYSr_neg	67	0.444723	0.426167	0.479194	ALAGLYLYSr	Metabolism (Formation/Degradation) of AlaGlyLys	Peptide metabolism
R_ALAGLYLYSr_pos	65	0.417591	0.511562	0.559223	ALAGLYLYSr	Metabolism (Formation/Degradation) of AlaGlyLys	Peptide metabolism
R_ALAGLYLYSt_neg	67	0.444723	0.426167	0.479194	ALAGLYLYSt	Transport of AlaGlyLys, Extracellular	Transport, extracellular
R_ALAGLYLYSt_pos	65	0.417591	0.511562	0.559223	ALAGLYLYSt	Transport of AlaGlyLys, Extracellular	Transport, extracellular
R_ALAGLYexR_neg	86	1.34894	0.0294798	0.0541191	ALAGLYexR	L-alanine/glycine reversible exchange	Transport, extracellular
R_ALAGLYexR_pos	87	1.33111	0.0241554	0.0462895	ALAGLYexR	L-alanine/glycine reversible exchange	Transport, extracellular
R_ALAHISALAr_neg	76	0.762729	0.151737	0.207652	ALAHISALAr	Metabolism (Formation/Degradation) of AlaHisAla	Peptide metabolism
R_ALAHISALAr_pos	58	0.236857	0.863267	0.881914	ALAHISALAr	Metabolism (Formation/Degradation) of AlaHisAla	Peptide metabolism
R_ALAHISALAt_neg	76	0.762729	0.151737	0.207652	ALAHISALAt	Transport of AlaHisAla, Extracellular	Transport, extracellular
R_ALAHISALAt_pos	58	0.236857	0.863267	0.881914	ALAHISALAt	Transport of AlaHisAla, Extracellular	Transport, extracellular
R_ALALYSTHRr_neg	78	0.730929	0.114466	0.165831	ALALYSTHRr	Metabolism (Formation/Degradation) of AlaLysThr	Peptide metabolism
R_ALALYSTHRr_pos	65	0.417591	0.511562	0.559223	ALALYSTHRr	Metabolism (Formation/Degradation) of AlaLysThr	Peptide metabolism
R_ALALYSTHRt_neg	78	0.730929	0.114466	0.165831	ALALYSTHRt	Transport of AlaLysThr, Extracellular	Transport, extracellular
R_ALALYSTHRt_pos	65	0.417591	0.511562	0.559223	ALALYSTHRt	Transport of AlaLysThr, Extracellular	Transport, extracellular
R_ALAPAT4te_neg	88	1.24321	0.0196645	0.0392806	ALAPAT4te	Transport of Alanine via Pat4	Transport, extracellular
R_ALAPAT4te_pos	91	1.28501	0.0100931	0.0241208	ALAPAT4te	Transport of Alanine via Pat4	Transport, extracellular
R_ALAR_neg	24	-1.0906	0.0294798	0.0541191	ALAR	Alanine racemase	Alanine and aspartate metabolism
R_ALAR_pos	43	-0.581069	0.426167	0.479194	ALAR	Alanine racemase	Alanine and aspartate metabolism
R_ALASERNaEx_pos	79	0.822505	0.0986176	0.146558	ALASERNaEx	L-alanine/L-serine Na-dependent exchange (Ala-L in)	Transport, extracellular
R_ALASm_pos	81	1.1145	0.0720013	0.114535	ALASm	5 aminolevulinate synthase	Glycine, serine, alanine, and threonine metabolism
R_ALATA_L_neg	60	0.0199722	0.756444	0.785613	ALATA_L	L-alanine transaminase	Glutamate metabolism
R_ALATA_L_pos	78	0.756379	0.114466	0.165831	ALATA_L	L-alanine transaminase	Glutamate metabolism
R_ALATA_Lm_neg	69	0.5242	0.349369	0.403217	ALATA_Lm	L alanine transaminase mitochondrial	Citric acid cycle
R_ALATA_Lm_pos	69	0.5242	0.349369	0.403217	ALATA_Lm	L alanine transaminase mitochondrial	Citric acid cycle
R_ALATHRNaEx_pos	79	0.841053	0.0986176	0.146558	ALATHRNaEx	L-alanine/L-threonine Na-dependent exchange (Ala-L in)	Transport, extracellular
R_ALA_DTDe_pos	45	0.0225918	0.511562	0.559223	ALA_DTDe	Exit of D-alanine from the enterocytes	Transport, extracellular
R_ALAt2r_neg	84	1.25918	0.0429637	0.0733635	ALAt2r	L alanine reversible transport via proton symport	Transport, extracellular
R_ALAt2r_pos	90	1.45975	0.0127184	0.0283932	ALAt2r	L alanine reversible transport via proton symport	Transport, extracellular
R_ALAt4_pos	83	1.21215	0.0513444	0.0854271	ALAt4	Alanine-Sodium symporter	Transport, extracellular
R_ALAtN1_neg	80	1.12249	0.0845213	0.129511	ALAtN1	Alanine transport (Na, H coupled)	Transport, extracellular
R_ALAtN1_pos	80	1.09699	0.0845213	0.129511	ALAtN1	Alanine transport (Na, H coupled)	Transport, extracellular
R_ALAtmi_neg	57	-0.178266	0.91769	0.928075	ALAtmi	Alanine transport from mitochondia to cytoplasm	Transport, mitochondrial
R_ALAyLATthc_pos	84	1.25044	0.0429637	0.0733635	ALAyLATthc	Transport of Alanine by y+LAT1 or y+LAT2 with co-transporter of h in small intestine and kidney	Transport, extracellular
R_ALCD19y_neg	29	-1.08311	0.0720013	0.114535	ALCD19y	Alcohol dehydrogenase glycerol NADP	Glycerophospholipid metabolism
R_ALCD1_neg	69	0.400274	0.349369	0.403217	ALCD1	Alcohol dehydrogenase (methanol)	Miscellaneous
R_ALCD1_pos	22	-1.05528	0.0196645	0.0392806	ALCD1	Alcohol dehydrogenase (methanol)	Miscellaneous
R_ALCD21_D_pos	68	0.858831	0.386679	0.441319	ALCD21_D	Alcohol dehydrogenase (D-1,2-propanediol)	Pyruvate metabolism
R_ALCD22_D_pos	44	-0.0404012	0.467855	0.519407	ALCD22_D	Alcohol dehydrogenase (D-lactaldehyde)	Pyruvate metabolism
R_ALCD22_L_pos	96	1.18395	0.00276143	0.0101701	ALCD22_L	Alcohol dehydrogenase (L-lactaldehyde)	Pyruvate metabolism
R_ALCD2x_pos	21	-1.4453	0.0158711	0.033564	ALCD2x	Alcohol dehydrogenase (ethanol)	Glycolysis/gluconeogenesis
R_ALCD2y_pos	18	-1.50386	0.00794974	0.0203633	ALCD2y	Alcohol dehydrogenase (ethanol, NADP)	Glycolysis/gluconeogenesis
R_ALDD19x_P_neg	90	1.2515	0.0127184	0.0283932	ALDD19x_P	Aldehyde dehydrogenase (phenylacetaldehyde, NADP)	Phenylalanine metabolism
R_ALDD19x_P_pos	10	-1.73729	0.00078817	0.00513616	ALDD19x_P	Aldehyde dehydrogenase (phenylacetaldehyde, NADP)	Phenylalanine metabolism
R_ALDD19xr_pos	90	1.2515	0.0127184	0.0283932	ALDD19xr	Aldehyde dehydrogenase (phenylacetaldehyde, NAD)	Phenylalanine metabolism
R_ALDD20x_pos	17	-1.41556	0.00619195	0.0169998	ALDD20x	Aldehyde dehydrogenase (indole-3-acetaldehyde, NAD)	Tryptophan metabolism
R_ALDD20xm_pos	15	-1.59123	0.00365166	0.011969	ALDD20xm	Aldehyde dehydrogenase indole 3 acetaldehyde NAD mitochondrial	Tryptophan metabolism
R_ALDD21_pos	26	-1.41287	0.0429637	0.0733635	ALDD21	Aldehyde dehydrogenase (pristanal, NAD)	Fatty acid oxidation
R_ALDD2x_pos	22	-0.941101	0.0196645	0.0392806	ALDD2x	Aldehyde dehydrogenase (acetaldehyde, NAD)	Glycolysis/gluconeogenesis
R_ALDD2xm_pos	9	-1.78574	0.000550018	0.00467566	ALDD2xm	Aldehyde dehydrogenase acetylaldehyde NAD mitochondrial	Glycolysis/gluconeogenesis
R_ALDD2y_pos	17	-1.2061	0.00619195	0.0169998	ALDD2y	Aldehyde dehydrogenase (acetaldehyde, NADP)	Glycolysis/gluconeogenesis
R_ALDSTRNte_pos	15	-1.67946	0.00365166	0.011969	ALDSTRNte	Aldosterone transport	Transport, extracellular
R_ALDSTRNtm_neg	15	-1.67946	0.00365166	0.011969	ALDSTRNtm	Aldosterone intracellular transport	Transport, mitochondrial
R_ALLOP1tu_pos	66	0.471885	0.467855	0.519407	ALLOP1tu	Uptake of allopurinol by the enterocytes	Drug metabolism
R_ALLOP2tu_pos	87	1.17234	0.0241554	0.0462895	ALLOP2tu	Uptake of allopurinol by the enterocytes	Drug metabolism
R_ALLOPOXDhep_pos	18	-1.49789	0.00794974	0.0203633	ALLOPOXDhep	Oxidation of allopurinol to oxypurinol in hepatocytes	Drug metabolism
R_ALLOPtepvb_neg	66	0.471885	0.467855	0.519407	ALLOPtepvb	Uptake of allopurinol by the hepatocytes	Drug metabolism
R_ALLOPtepvb_pos	18	-1.49789	0.00794974	0.0203633	ALLOPtepvb	Uptake of allopurinol by the hepatocytes	Drug metabolism
R_ALLTNti_neg	6	-2.06866	0.000170109	0.00267261	ALLTNti	Allantoin irreversible uniport	Transport, extracellular
R_ALLTNti_pos	6	-1.87544	0.000170109	0.00267261	ALLTNti	Allantoin irreversible uniport	Transport, extracellular
R_ALOX12_pos	29	-1.17238	0.0720013	0.114535	ALOX12	Arachidonate 12-lipoxygenase	Eicosanoid metabolism
R_ALOX15_pos	34	-0.743605	0.151737	0.207652	ALOX15	Arachidonate 15-lipoxygenase	Eicosanoid metabolism
R_ALOX52_pos	35	-0.609991	0.173352	0.230963	ALOX52	Arachidonate 5-lipoxygenase	Eicosanoid metabolism
R_ALOX5_pos	21	-1.39059	0.0158711	0.033564	ALOX5	Arachidonate 5-lipoxygenase	Eicosanoid metabolism
R_ALR2_pos	96	1.18395	0.00276143	0.0101701	ALR2	Aldose reductase (methylglyoxal)	Pyruvate metabolism
R_ALR3_pos	96	1.18395	0.00276143	0.0101701	ALR3	Aldose reductase (acetol)	Pyruvate metabolism
R_ALR_pos	23	-1.24556	0.0241554	0.0462895	ALR	Aldose reductase	Pyruvate metabolism
R_AM19CSALThr_pos	13	-1.67768	0.00205831	0.00867112	AM19CSALThr	Alternative pathway for formation of AM19 from AM1 in hepatocytes	Drug metabolism
R_AM19CShr_pos	17	-1.6157	0.00619195	0.0169998	AM19CShr	Oxidation of AM9 to AM19 (cyclosporine) in hepatocytes	Drug metabolism
R_AM19CSitr_pos	17	-1.63196	0.00619195	0.0169998	AM19CSitr	AM19CSitr	Drug metabolism
R_AM19CSteb_pos	10	-1.76918	0.00078817	0.00513616	AM19CSteb	Efflux of AM19-cyclosporine into bile	Drug metabolism
R_AM1A4NCShc_pos	19	-1.51818	0.0100931	0.0241208	AM1A4NCShc	Demethylation of AM1A to AM1A4N in hepatocytes	Drug metabolism
R_AM1A4NCSteb_pos	19	-1.51818	0.0100931	0.0241208	AM1A4NCSteb	Efflux of AM1A4N-cyclosporine into bile	Drug metabolism
R_AM1ACCShr_pos	20	-1.5692	0.0127184	0.0283932	AM1ACCShr	Oxidation of AM1c to AM1Ac in hepatocytes (alternative mechanism)	Drug metabolism
R_AM1ACCSitr_neg	20	-1.5692	0.0127184	0.0283932	AM1ACCSitr	AM1ACCSitr	Drug metabolism
R_AM1ACCStev_pos	20	-1.5692	0.0127184	0.0283932	AM1ACCStev	Efflux of AM1Ac-cyclosporine into hepatic vein	Drug metabolism
R_AM1ACShr_pos	20	-1.50984	0.0127184	0.0283932	AM1ACShr	Formation of AM1A-cyclosporine in hepatocytes	Drug metabolism
R_AM1ACSitr_pos	20	-1.50984	0.0127184	0.0283932	AM1ACSitr	AM1ACSitr	Drug metabolism
R_AM1ACSteb_pos	10	-1.76918	0.00078817	0.00513616	AM1ACSteb	Efflux of AM1A-cyclosporine into bile	Drug metabolism
R_AM1ACStep_neg	10	-1.76952	0.00078817	0.00513616	AM1ACStep	Efflux of AM1A (cyclosporine) into portal blood	Drug metabolism
R_AM1ACStep_pos	20	-1.50984	0.0127184	0.0283932	AM1ACStep	Efflux of AM1A (cyclosporine) into portal blood	Drug metabolism
R_AM1ALCShr_pos	16	-1.56495	0.00478572	0.014183	AM1ALCShr	Formation of AM1AL-cyclosporine in hepatocytes	Drug metabolism
R_AM1ALCSitr_pos	20	-1.50984	0.0127184	0.0283932	AM1ALCSitr	AM1ALCSitr	Drug metabolism
R_AM1ALCSteb_pos	10	-1.76918	0.00078817	0.00513616	AM1ALCSteb	Efflux of AM1AL-cyclosporine into bile	Drug metabolism
R_AM1ALCStep_neg	10	-1.76918	0.00078817	0.00513616	AM1ALCStep	Efflux of AM1AL (cyclosporine) into portal blood	Drug metabolism
R_AM1ALCStep_pos	16	-1.56495	0.00478572	0.014183	AM1ALCStep	Efflux of AM1AL (cyclosporine) into portal blood	Drug metabolism
R_AM1C4N9CShc_pos	16	-1.58695	0.00478572	0.014183	AM1C4N9CShc	Demethylation of AM1c9 to AM1c4N9 in hepatocytes (alternative mechanism)	Drug metabolism
R_AM1C4N9CSteb_pos	16	-1.58695	0.00478572	0.014183	AM1C4N9CSteb	Efflux of AM1c4N9-cyclosporine into bile	Drug metabolism
R_AM1C9CShr_pos	18	-1.58931	0.00794974	0.0203633	AM1C9CShr	Oxidation of AM1c to AM1c9 in hepatocytes (alternative mechanism)	Drug metabolism
R_AM1C9CSitr_pos	18	-1.58931	0.00794974	0.0203633	AM1C9CSitr	AM1C9CSitr	Drug metabolism
R_AM1C9CSteb_pos	10	-1.76918	0.00078817	0.00513616	AM1C9CSteb	Efflux of AM1c9-cyclosporine into bile	Drug metabolism
R_AM1C9CStev_neg	10	-1.76952	0.00078817	0.00513616	AM1C9CStev	Efflux of AM1c9-cyclosporine into hepatic vein	Drug metabolism
R_AM1C9CStev_pos	18	-1.58931	0.00794974	0.0203633	AM1C9CStev	Efflux of AM1c9-cyclosporine into hepatic vein	Drug metabolism
R_AM1CCShr_pos	17	-1.59668	0.00619195	0.0169998	AM1CCShr	Oxidation of cyclosporine to AM1c in hepatocytes	Drug metabolism
R_AM1CCSitr_neg	17	-1.57689	0.00619195	0.0169998	AM1CCSitr	AM1CCSitr	Drug metabolism
R_AM1CCSitr_pos	17	-1.59668	0.00619195	0.0169998	AM1CCSitr	AM1CCSitr	Drug metabolism
R_AM1CCSteb_pos	10	-1.76918	0.00078817	0.00513616	AM1CCSteb	Efflux of AM1c-cyclosporine into bile	Drug metabolism
R_AM1CCStev_neg	10	-1.76918	0.00078817	0.00513616	AM1CCStev	Efflux of AM1c-cyclosporine into hepatic vein	Drug metabolism
R_AM1CCStev_pos	17	-1.59668	0.00619195	0.0169998	AM1CCStev	Efflux of AM1c-cyclosporine into hepatic vein	Drug metabolism
R_AM1CGLChr_pos	12	-1.64634	0.00151964	0.0075044	AM1CGLChr	Glucuronidation of AM1c in hepatocytes	Drug metabolism
R_AM1CGLCitr_neg	12	-1.64634	0.00151964	0.0075044	AM1CGLCitr	AM1CGLCitr	Drug metabolism
R_AM1CGLCteb_pos	12	-1.64634	0.00151964	0.0075044	AM1CGLCteb	Efflux of AM1c-glucuronide into bile	Drug metabolism
R_AM1CSAhr_pos	12	-1.67951	0.00151964	0.0075044	AM1CSAhr	Oxidation of cyclosporine to AM1 in hepatocytes	Drug metabolism
R_AM1CSAitr_neg	12	-1.67951	0.00151964	0.0075044	AM1CSAitr	AM1CSAitr	Drug metabolism
R_AM1CSAitr_pos	12	-1.67951	0.00151964	0.0075044	AM1CSAitr	AM1CSAitr	Drug metabolism
R_AM1CSAtep_neg	10	-1.76979	0.00078817	0.00513616	AM1CSAtep	Efflux of AM1 (cyclosporine) into portal blood	Drug metabolism
R_AM1CSAtep_pos	12	-1.67951	0.00151964	0.0075044	AM1CSAtep	Efflux of AM1 (cyclosporine) into portal blood	Drug metabolism
R_AM4N9CShc_pos	18	-1.58628	0.00794974	0.0203633	AM4N9CShc	Demethylation of AM9 to AM4N9 in hepatocytes	Drug metabolism
R_AM4N9CShr_pos	18	-1.56828	0.00794974	0.0203633	AM4N9CShr	Oxidation of AM4N to AM4N9 in hepatocytes	Drug metabolism
R_AM4N9CSitr_pos	18	-1.56828	0.00794974	0.0203633	AM4N9CSitr	AM4N9CSitr	Drug metabolism
R_AM4N9CStev_neg	10	-1.76918	0.00078817	0.00513616	AM4N9CStev	Efflux of AM4N9-cyclosporine into hepatic vein	Drug metabolism
R_AM4N9CStev_pos	19	-1.57461	0.0100931	0.0241208	AM4N9CStev	Efflux of AM4N9-cyclosporine into hepatic vein	Drug metabolism
R_AM4NC9CSteb_pos	10	-1.76952	0.00078817	0.00513616	AM4NC9CSteb	Efflux of AM4N9-cyclosporine into bile	Drug metabolism
R_AM4NCShr_pos	22	-1.48574	0.0196645	0.0392806	AM4NCShr	Demethylation of cyclosporine to AM4N in hepatocytes	Drug metabolism
R_AM4NCSitr_pos	18	-1.56828	0.00794974	0.0203633	AM4NCSitr	AM4NCSitr	Drug metabolism
R_AM4NCSteb_pos	10	-1.76952	0.00078817	0.00513616	AM4NCSteb	Efflux of AM4N-cyclosporine into bile	Drug metabolism
R_AM4NCStep_neg	10	-1.76918	0.00078817	0.00513616	AM4NCStep	Efflux of AM4N (cyclosporine) into portal blood	Drug metabolism
R_AM4NCStep_pos	22	-1.48574	0.0196645	0.0392806	AM4NCStep	Efflux of AM4N (cyclosporine) into portal blood	Drug metabolism
R_AM6SAD_pos	19	-1.57082	0.0100931	0.0241208	AM6SAD	Aminomuconate-semialdehyde dehydrogenase	Tryptophan metabolism
R_AM9CSAhr_pos	12	-1.67951	0.00151964	0.0075044	AM9CSAhr	Oxidation of cyclosporine to AM9 in hepatocytes	Drug metabolism
R_AM9CSAitr_neg	17	-1.59668	0.00619195	0.0169998	AM9CSAitr	AM9CSAitr	Drug metabolism
R_AM9CSAitr_pos	12	-1.67951	0.00151964	0.0075044	AM9CSAitr	AM9CSAitr	Drug metabolism
R_AM9CSAteb_pos	10	-1.76918	0.00078817	0.00513616	AM9CSAteb	Efflux of AM9-cyclosporine into bile	Drug metabolism
R_AM9CSAtep_neg	10	-1.76792	0.00078817	0.00513616	AM9CSAtep	Efflux of AM9 (cyclosporine) into portal blood	Drug metabolism
R_AM9CSAtep_pos	12	-1.67951	0.00151964	0.0075044	AM9CSAtep	Efflux of AM9 (cyclosporine) into portal blood	Drug metabolism
R_AMACR2p_pos	12	-1.68525	0.00151964	0.0075044	AMACR2p	Alpha-methylacyl-CoA racemase (reductase)	Bile acid synthesis
R_AMACRp_pos	16	-1.47754	0.00478572	0.014183	AMACRp	Alpha-methylacyl-CoA racemase	Bile acid synthesis
R_AMANK_pos	29	-0.929876	0.0720013	0.114535	AMANK	N-acetyl-D-mannosamine kinase	Aminosugar metabolism
R_AMCOXO_pos	19	-1.57082	0.0100931	0.0241208	AMCOXO	2-aminomuconate reductase	Tryptophan metabolism
R_AMETAMte_neg	22	-1.45514	0.0196645	0.0392806	AMETAMte	Assumed Passive Diffusion into Extracellular Space	Transport, extracellular
R_AMETAMte_pos	17	-1.40489	0.00619195	0.0169998	AMETAMte	Assumed Passive Diffusion into Extracellular Space	Transport, extracellular
R_AMETr_neg	18	-1.60623	0.00794974	0.0203633	AMETr	S-Adenosyl-L-methionine intracellular diffusion	Transport, endoplasmic reticular
R_AMETr_pos	19	-1.38679	0.0100931	0.0241208	AMETr	S-Adenosyl-L-methionine intracellular diffusion	Transport, endoplasmic reticular
R_AMETt2m_neg	36	-0.988199	0.197116	0.255164	AMETt2m	S-Adenosyl-L-methionine reversible transport, mitochondrial	Transport, mitochondrial
R_AMETt2m_pos	36	-0.988199	0.197116	0.255164	AMETt2m	S-Adenosyl-L-methionine reversible transport, mitochondrial	Transport, mitochondrial
R_AMETt_neg	10	-1.69969	0.00078817	0.00513616	AMETt	Transport of S-Adenosyl-L-Methionine, Paracellular Transport	Transport, extracellular
R_AMETt_pos	24	-1.25481	0.0294798	0.0541191	AMETt	Transport of S-Adenosyl-L-Methionine, Paracellular Transport	Transport, extracellular
R_AMETtm_neg	36	-0.988199	0.197116	0.255164	AMETtm	S Adenosyl L methionine reversible transport mitochondrial	Transport, mitochondrial
R_AMETtm_pos	36	-0.988199	0.197116	0.255164	AMETtm	S Adenosyl L methionine reversible transport mitochondrial	Transport, mitochondrial
R_AMPDA_pos	66	0.181385	0.467855	0.519407	AMPDA	Adenosine monophosphate deaminase	Nucleotide interconversion
R_AMPTASECG_pos	77	0.696296	0.132118	0.185317	AMPTASECG	Alanyl aminopeptidase (cys-gly)	Glutathione metabolism
R_AMPTASECGe_pos	85	0.875242	0.0357001	0.0633743	AMPTASECGe	Alanyl aminopeptidase (cys-gly) (e)	Glutathione metabolism
R_AMPTASEPG_neg	33	-0.718838	0.132118	0.185317	AMPTASEPG	Aminopeptidase (pro-gly)	Transport, extracellular
R_AMPTASEPG_pos	57	0.0983026	0.91769	0.928075	AMPTASEPG	Aminopeptidase (pro-gly)	Transport, extracellular
R_AMPtn_pos	17	-1.44975	0.00619195	0.0169998	AMPtn	AMP transport via diffusion cytosol to nucleus	Transport, nuclear
R_AMPtp_neg	24	-1.43869	0.0294798	0.0541191	AMPtp	AMP transporter, peroxisome	Transport, peroxisomal
R_AMPtp_pos	24	-1.43869	0.0294798	0.0541191	AMPtp	AMP transporter, peroxisome	Transport, peroxisomal
R_AMY1e_pos	15	-1.64109	0.00365166	0.011969	AMY1e	Alpha-amylase, extracellular (strch1 -> strch2)	Starch and sucrose metabolism
R_AMY2e_pos	15	-1.64109	0.00365166	0.011969	AMY2e	Alpha-amylase, extracellular (glygn2 -> glygn4)	Starch and sucrose metabolism
R_AND19ONEc_pos	15	-1.59975	0.00365166	0.011969	AND19ONEc	Hydroxylation of Androst-4-Ene-3, 17-Dione	Steroid metabolism
R_AND19ONEt_pos	15	-1.59975	0.00365166	0.011969	AND19ONEt	Secretion of 19-Hydroxyandrost-4-Ene-3, 17-Dione	Transport, extracellular
R_ANDRSTANDRte_pos	17	-1.51448	0.00619195	0.0169998	ANDRSTANDRte	Transport of 5Alpha-Androstane-3, 17-Dione, Extracellular	Transport, extracellular
R_ANDRSTANDRtr_pos	44	-0.433855	0.467855	0.519407	ANDRSTANDRtr	Transport of 5Alpha-Androstane-3, 17-Dione, Endoplasmatic Reticulum	Transport, endoplasmic reticular
R_ANDRSTNDNte_pos	16	-1.5338	0.00478572	0.014183	ANDRSTNDNte	Transport of Androst-4-Ene-3, 17-Dione, Extracellular	Transport, extracellular
R_ANDRSTRNGLCte_pos	19	-1.38655	0.0100931	0.0241208	ANDRSTRNGLCte	Glucuronidated compound transport	Transport, extracellular
R_ANDRSTRNGLCtr_neg	19	-1.38655	0.0100931	0.0241208	ANDRSTRNGLCtr	Glucuronidated compound transport (ER)	Transport, endoplasmic reticular
R_ANDRSTRNte_neg	23	-1.32831	0.0241554	0.0462895	ANDRSTRNte	Androsterone transport	Transport, extracellular
R_ANDRSTRNte_pos	16	-1.49914	0.00478572	0.014183	ANDRSTRNte	Androsterone transport	Transport, extracellular
R_ANDRSTRNtr_neg	44	-0.433855	0.467855	0.519407	ANDRSTRNtr	Androsterone intracellular transport	Transport, endoplasmic reticular
R_ANDRSTRNtr_pos	17	-1.44107	0.00619195	0.0169998	ANDRSTRNtr	Androsterone intracellular transport	Transport, endoplasmic reticular
R_ANTHte_neg	30	-1.06798	0.0845213	0.129511	ANTHte	Transport of anthranilate	Transport, extracellular
R_ANTIPYRENEte_pos	22	-0.674997	0.0196645	0.0392806	ANTIPYRENEte	Xenobiotic transport	Transport, extracellular
R_AOBUTDsm_pos	30	-0.894624	0.0845213	0.129511	AOBUTDsm	L-2-amino-3-oxobutanoate decarboxylation, mitochondrial (spontaneous)	Glycine, serine, alanine, and threonine metabolism
R_APAT2rm_neg	19	-1.37416	0.0100931	0.0241208	APAT2rm	3-Aminopropanoate:2-oxoglutarate aminotransferase (m)	Beta-Alanine metabolism
R_APAT2rm_pos	56	-0.041735	0.972539	0.977296	APAT2rm	3-Aminopropanoate:2-oxoglutarate aminotransferase (m)	Beta-Alanine metabolism
R_APNNOXte_neg	23	-1.47187	0.0241554	0.0462895	APNNOXte	Xenobiotic transport	Transport, extracellular
R_APNPT_pos	10	-1.76544	0.00078817	0.00513616	APNPT	ATP:pantetheine 4-phosphotransferase	CoA synthesis
R_APOCF_pos	55	0.0550457	1	1	APOCF	Apocarboxylase formation	Biotin metabolism
R_APOCFm_pos	74	0.614463	0.197116	0.255164	APOCFm	Apocarboxylase formation, mitochondrial	Biotin metabolism
R_APOC_LYS_BTNP_pos	55	0.0550457	1	1	APOC_LYS_BTNP	Proteolysis of apoC-Lys-btn	Biotin metabolism
R_APOC_LYS_BTNPm_pos	74	0.614463	0.197116	0.255164	APOC_LYS_BTNPm	Proteolysis of apoC-Lys-btn, mitochondrial	Biotin metabolism
R_APPNNte_pos	23	-1.47187	0.0241554	0.0462895	APPNNte	Xenobiotic transport	Transport, extracellular
R_APRGSTRNABCt_pos	16	-1.57846	0.00478572	0.014183	APRGSTRNABCt	Hydroxyprogesterone Transport, Active	Transport, extracellular
R_APRGSTRNt1e_neg	73	1.03606	0.223024	0.28101	APRGSTRNt1e	Hydroxyprogesterone Transport, Antiport	Transport, extracellular
R_APRGSTRNt1e_pos	79	0.589243	0.0986176	0.146558	APRGSTRNt1e	Hydroxyprogesterone Transport, Antiport	Transport, extracellular
R_APRGSTRNte_neg	79	0.589243	0.0986176	0.146558	APRGSTRNte	Hydroxyprogesterone transport	Transport, extracellular
R_APRGSTRNte_pos	73	1.03606	0.223024	0.28101	APRGSTRNte	Hydroxyprogesterone transport	Transport, extracellular
R_APRTO2_pos	6	-1.96488	0.000170109	0.00267261	APRTO2	N acetylputrescine oxygen oxireductase deaminating	Arginine and proline metabolism
R_AQCOBALt_pos	16	-1.68444	0.00478572	0.014183	AQCOBALt	Aquacob(III)alamin uptake	Transport, extracellular
R_ARABR_pos	17	-1.68312	0.00619195	0.0169998	ARABR	Arabinose reductase	Pentose phosphate pathway
R_ARAB_Lt_pos	17	-1.68312	0.00619195	0.0169998	ARAB_Lt	L arabinoase extracellular transport	Transport, extracellular
[truncated: 12,572 more rows]

## Sheet: Sucrose+JNK_D2vsSucrose (Liver)
reaction_id	wilcoxon_statistic	cohens_d	p_value	adjusted_p_value	reaction_no_direction	reaction_name	subsytem
[truncated: 13,763 more rows]

[truncated: 9 more sheets: SucrosevsControl (vWAT), Sucrose+JNK_D1vsSucrose (vWAT), Sucrose+JNK_D2vsSucrose (vWAT), SucrosevsControl (SkM), Sucrose+JNK_D1vsSucrose (SkM), Sucrose+JNK_D2vsSucrose (SkM), SucrosevsControl (Brain), Sucrose+JNK_D1vsSucrose (Brain), Sucrose+JNK_D2vsSucrose (Brain)]
